# Supplementary material
Source: ML conference proceedings conference paper supplement (https://openreview.net/forum?id=7kiL7mNrxG)
Supplement: supplementary_material [file attributes.xlsx]

## Sheet: final_appr
Cat	Attributes	Subcategory	Lemma (ori)	Synonym (ori)	Lemma (kim)	Synonym (ori)
appearance	morphology	General Condition	normal	normal	normal	normal
appearance	morphology	Shape and Structure	linear	linear, linearly, platelike, linear structures, linearly oriented	linear, platelike	linear, linearly, linearly oriented, platelike
appearance	morphology	Texture and Density	patchy	patchy		patchy
appearance	morphology	Texture and Density	nodular	nodular, reticular nodular	nodular	nodular
appearance	morphology	Texture and Density	calcify	calcified, densely calcified, heavily calcified	calcified, calcification	calcified
appearance	morphology	Texture and Density	streaky	streak, streaky, streaks	streak, streaky, streaks	streak, streaky, streaks
appearance	morphology	Shape and Structure	tortuous	tortuous, tortuosity, mild tortuosity, slightly tortuous	tortuous, tortuosity	tortuous, tortuosity
appearance	morphology	General Condition	stable	stable	stable, unchanged, constant, grossly stable	stable, unchanged, constant, grossly stable
appearance	morphology	Shape and Structure	round	round, rounded	round, rounded	round, rounded
appearance	morphology	Texture and Density	heterogeneous	heterogeneous, heterogenous	heterogeneous, heterogenous, inhomogeneous	heterogeneous, heterogenous, inhomogeneous
appearance	morphology	Texture and Density	loculated	loculated, partly loculated	loculated	loculated
appearance	morphology	Texture and Density	hazy	hazy	hazy	hazy
appearance	morphology	Texture and Density	dense	denser, dense, densely	denser, dense	denser, dense, densely
appearance	morphology	Shape and Structure	prominent	prominent, prominence, marked, frank	prominent, prominence, frank, exuberant, marked	prominent, prominence, marked
appearance	morphology	Shape and Structure	widen	widened, wide	widened, wide, extensive	widened, wide
appearance	morphology	Shape and Structure	enlargement	enlarged, enlargement	enlarged, enlargement, dilated	enlarged, enlargement
appearance	morphology	Texture and Density	faint	faint, vague	faint, vague	faint, vague
appearance	morphology	Shape and Structure	coil	coiled, looped, curled up, curling, curled, kinking, kinked	coiled, looped, curled up, curling, curled, kinking	coiled, looped, curled up, curling, curled, kinking
appearance	morphology	Shape and Structure	flatten	flattened, flattening	flattened, flattening	flattened, flattening
appearance	morphology	Texture and Density	subtle	subtle	subtle	subtle
appearance	morphology	Shape and Structure	thicken	thickening, thickened	thickening, thickened	thickening, thickened
appearance	morphology	Texture and Density	clear	clear	clear	clear
appearance	morphology	Texture and Density	indistinct	indistinct, mildly indistinct	indistinct	indistinct
appearance	morphology	General Condition	unremarkable	unremarkable	unremarkable	unremarkable
appearance	morphology	Shape and Structure	ovoid	oval, elliptical, ovoid	oval, elliptical, ovoid, spherical, globular	oval, elliptical, ovoid
appearance	morphology	Shape and Structure	compressive	compressive	compressive	compressive
appearance	morphology	Texture and Density	interstitial	interstitial		interstitial
appearance	morphology	Shape and Structure	irregular	irregular, irregularly, extremely irregular	irregular	irregular, irregularly
appearance	morphology	Texture and Density	reticular	reticular, reticulated, linear reticular	reticular, reticulated	reticular, reticulated
appearance	morphology	Texture and Density	coarse	coarse, coarseness	coarse, coarseness	coarse, coarseness
appearance	morphology	Texture and Density	confluent	confluent, coalescent	confluent, coalescent	confluent, coalescent
appearance	morphology	Shape and Structure	intact	intact, grossly intact	intact, grossly intact	intact, grossly intact
appearance	morphology	Shape and Structure	triangular	triangular	triangular	triangular
appearance	morphology	Shape and Structure	spherical	spherical, globular		spherical, globular
appearance	morphology	Shape and Structure	hyperinflated	hyperinflated, hyperexpanded, hyperexpansion, hypoinflated	hyperinflated, hyperexpanded, hyperexpansion	hyperinflated, hyperexpanded, hyperexpansion
appearance	morphology	Shape and Structure	asymmetric	asymmetric,asymmetrically, asymmetrically distributed, asymmetrical pattern, asymmetric pattern	asymmetric	asymmetric, asymmetric pattern
appearance	morphology	General Condition	similar	similar	similar	similar
appearance	morphology	Shape and Structure	unfolded	unfolded	unfolded	unfolded
appearance	morphology	Texture and Density	coarsen	coarsening, coarsened	coarsening, coarsened	coarsening, coarsened
appearance	morphology	Shape and Structure	convex	convexity, convex	convexity, convex	convexity, convex
appearance	morphology	Shape and Structure	bulge	bulging, bulbous	bulging, bulbous	bulging, bulbous
appearance	morphology	Shape and Structure	well expand	well expanded	well expanded	well expanded
appearance	morphology	Shape and Structure	wedge	wedge, wedged, wedging, wedge shaped, anterior wedge	wedge, wedged, wedging, wedge shaped	wedge, wedged, wedging, wedge shaped
appearance	morphology	Shape and Structure	spiculated	spiculated	spiculated	spiculated
appearance	morphology	Texture and Density	sclerotic	sclerotic	sclerotic	sclerotic
appearance	morphology	Shape and Structure	sharp	sharp	sharp	sharp
appearance	morphology	General Condition	abnormal	abnormal	abnormal	abnormal
appearance	morphology	Texture and Density	punctate	punctate	punctate	punctate
appearance	morphology	Texture and Density	fibrotic	fibrotic	fibrotic	fibrotic
appearance	morphology	Shape and Structure	displace	displaced	displaced	displaced
appearance	morphology	Texture and Density	fine	fine	fine	fine
appearance	morphology	Shape and Structure	stellate	stellate	stellate	stellate
appearance	morphology	Shape and Structure	configuration	configuration	configuration	configuration
appearance	morphology	Shape and Structure	curvilinear	curvilinear	curvilinear	curvilinear
appearance	morphology	General Condition	normal course	normal course	normal course	normal course
appearance	morphology	Shape and Structure	sliver	sliver	left ventricular configuration	left ventricular configuration
appearance	morphology	Shape and Structure	vertical	vertical, vertically, vertically oriented	sliver	sliver
appearance	morphology	Texture and Density	demineralize	demineralized	vertical, vertically oriented	vertical
appearance	morphology	Shape and Structure	hypertrophic	hypertrophic	demineralized	demineralized
appearance	morphology	Texture and Density	fibronodular	fibronodular	hypertrophic	hypertrophic
appearance	morphology	Shape and Structure	luminal narrow	luminal narrowing	fibronodular	fibronodular
appearance	morphology	Texture and Density	infiltrative	infiltrative	luminal narrowing	luminal narrowing
appearance	morphology	Texture and Density	scar	scarring	infiltrative	infiltrative
appearance	morphology	Shape and Structure	elevate	elevated	scarring	scarring
appearance	morphology	Shape and Structure	distend	distended	elevated	elevated
appearance	morphology	General Condition	better define	better defined	distended	distended
appearance	morphology	Shape and Structure	bullous	bullous	better defined	better defined
appearance	morphology	Shape and Structure	curve	curved	bullous	bullous
appearance	morphology	Shape and Structure	atelectatic	atelectatic	curved, kinked	curved
appearance	morphology	Texture and Density	hyperlucency	hyperlucency	atelectatic
appearance	morphology	Texture and Density	fluid filled	fluid filled	hyperlucency	hyperlucency
appearance	morphology	Shape and Structure	circumferential	circumferential		fluid filled
appearance	morphology	Shape and Structure	deviation	deviation	circumferential	circumferential
appearance	morphology	Shape and Structure	double contour	double contour	deviation	deviation
appearance	morphology	Texture and Density	engorge	engorged	double contour	double contour
appearance	morphology	Texture and Density	lucency	lucency, central lucency, linear lucency, linear areas of lucency, central rounded lucency	engorged	engorged
appearance	morphology	Texture and Density	complex	complex		central rounded lucency
appearance	morphology	Shape and Structure	surround	surrounding	complex	complex
appearance	morphology	Texture and Density	band	band	surrounding	surrounding
appearance	morphology	Shape and Structure	horizontal	horizontal, horizontally oriented	band	band
appearance	morphology	Texture and Density	mixed	mixed	horizontal
appearance	morphology	Texture and Density	homogeneous	heterogeneous, heterogenous, inhomogeneous		rightward convex
appearance	morphology	Texture and Density	thin	thin	mixed	mixed
appearance	morphology	Texture and Density	crescentic	crescentic	homogeneous	homogeneous
appearance	morphology	Texture and Density	flow	flowing	thin	thin
appearance	morphology	Texture and Density	micro	micro	crescentic	crescentic
appearance	morphology	Shape and Structure	lenticular	lenticular	flowing	flowing
appearance	morphology	Shape and Structure	exuberant	exuberant	micro	micro
appearance	morphology	Texture and Density	geographic	geographic, geographically, geographically marginated	lenticular	lenticular
appearance	morphology	Texture and Density	alveolar pattern	alveolar pattern		exuberant
appearance	morphology	Shape and Structure	circular	circular		rightward deviation
appearance	morphology	Shape and Structure	open circle	open circle	geographic, geographically, geographically marginated	geographic, geographically, geographically marginated
appearance	morphology	Shape and Structure	elongation	elongation	alveolar pattern	alveolar pattern
appearance	morphology	Shape and Structure	kyphotic angulation	kyphotic angulation		circular
appearance	morphology	Shape and Structure	taper	taper, tapered, tapered configuration	open circle	open circle
appearance	morphology	Shape and Structure	lateral peak	lateral peaking	elongation	elongation
appearance	morphology	Texture and Density	ground glass	ground glass	kyphotic angulation	kyphotic angulation
appearance	morphology	Shape and Structure	symmetrical	symmetrical, symmetrically, symmetrically expanded		sharp
appearance	morphology	Shape and Structure	deep	deep	tapered	taper, tapered
appearance	morphology	Shape and Structure	even	even	lateral peaking	lateral peaking
appearance	morphology	Shape and Structure	misalign	misaligned	ground glass	ground glass
appearance	morphology	Shape and Structure	distortion	distortion, distorts	symmetrical	symmetrical, symmetrically
appearance	morphology	Shape and Structure	tent	tenting		deep
appearance	morphology	Texture and Density	alveolar pattern	alveolar pattern	even	even
appearance	morphology	Shape and Structure	fragment	fragmented	misaligned	misaligned
appearance	morphology	Shape and Structure	biconcave	biconcave	distortion, distorts	distortion, distorts
appearance	morphology	Shape and Structure	cavitary	cavitary	tenting	tenting
appearance	morphology	Shape and Structure	lobulated	lobulated, lobular		alveolar
appearance	morphology	Shape and Structure	leftward	leftward	fragmented	fragmented
appearance	morphology	Shape and Structure	nondisplaced	nondisplaced	biconcave	biconcave
appearance	morphology	Texture and Density	congest	congested	cavitary	cavitary
appearance	morphology	Shape and Structure	rightward	rightward, rightward convex, rightward deviation	lobulated, lobular	lobulated, lobular
appearance	morphology	Texture and Density	consolidative	consolidative	leftward	leftward
appearance	morphology	Texture and Density	multiloculated	multiloculated	nondisplaced	nondisplaced
appearance	morphology	Shape and Structure	dilated	dilated, not dilated	congested	congested
appearance	morphology	General Condition	atypical	atypical	rightward	rightward
appearance	morphology	Shape and Structure	blunt	blunt, blunted, blunting	consolidative	consolidative
appearance	morphology	Shape and Structure	margin	margin, marginated, irregularly marginated	multiloculated	multiloculated
appearance	morphology	Shape and Structure	discrete	discrete		dilated
appearance	morphology	Shape and Structure	sharp lower margin	sharp lower margin		atypical
appearance	morphology	Texture and Density	slightly deep	slightly deep
appearance	morphology	Shape and Structure	overdistended	overdistended
appearance	distribution	Extent	focal	focal, focus		blunt, blunted, blunting
appearance	distribution	Pattern	diffuse	diffuse, disseminated, diffusely		margin, marginated
appearance	distribution	Extent	multifocal	multifocal		lucency
appearance	distribution	Extent	widespread	widespread		discrete
appearance	distribution	Pattern	patchy	patchy
appearance	distribution	Pattern	scatter	scattered	focal, focus	focal, focus
appearance	distribution	Extent	subsegmental	subsegmental	diffuse, disseminated	diffuse, disseminated, diffusely
appearance	distribution	Extent	peripheral	peripheral	multifocal	multifocal
appearance	distribution	Extent	interstitial	interstitial	widespread	widespread
appearance	distribution	Other description	generalize	generalized	patchy
appearance	distribution	Extent	partial	partial, residual	scattered	scattered
appearance	distribution	Pattern	evenly	evenly, evenly distributed	subsegmental	subsegmental
appearance	distribution	Extent	perifocal	perifocal	peripheral	peripheral
appearance	distribution	Extent	more distal aspect	more distal aspect	interstitial	interstitial
appearance	distribution	Extent	adjacent	adjacent	generalized	generalized
appearance	distribution	Pattern	gradient	gradient	partial	partial
appearance	distribution	Pattern	redistribution pattern	redistribution pattern	evenly	evenly, evenly distributed
appearance	distribution	Pattern	dependent	dependent	perifocal	perifocal
appearance	distribution	Pattern	disseminate	disseminate, disseminated, widely disseminated	more distal aspect	more distal aspect
appearance	distribution	Pattern	cephalization	cephalization	adjacent	adjacent
appearance	distribution	Extent	local	local	gradient	gradient
appearance	distribution	Other description	different	different, different manner	redistribution pattern	redistribution pattern
appearance	distribution	Extent	horizontal	horizontal	dependent	dependent
appearance	distribution	Extent	segmental	segmental	widely disseminated	disseminate, disseminated, widely disseminated
appearance	measurement	Size	large	larger, large		cephalization
appearance	measurement	Size	enlarge	enlargement, enlarged, expanded		local
appearance	measurement	Size	tiny	tiny, miniscule		different, different manner
appearance	measurement	Size	small to moderate	small to moderate
appearance	measurement	Size	moderate	moderate
appearance	measurement	Size	750 cc	750 cc	small, low, smaller, lower	small, low, smaller, lower
appearance	measurement	Size	2 kg	2 kg	larger, large	larger, large
appearance	measurement	Size	3l	3l	enlargement, enlarged, expanded	enlargement, enlarged, expanded
appearance	measurement	Size	very small	very small, very low	normal	normal
appearance	measurement	Size	large scale	large scale	borderline	borderline
appearance	measurement	Size	low	small, low, smaller, lower, minor	tiny, miniscule	tiny, miniscule
appearance	measurement	Size	half	half	decrease, decreasing, diminished, decreased, reduced	decrease, decreasing, diminished, decreased, reduced
appearance	measurement	Size	various size	various sizes	increased	increase, increased
appearance	measurement	Quantity	multiple	multiple	massive
appearance	measurement	Quantity	two	2, two	top normal, upper limits of normal, upper limits normal
appearance	measurement	Quantity	single	one, 1, single		large scale
appearance	measurement	Quantity	three	3, three		low in volume
appearance	measurement	Quantity	several	several	small to moderate	small to moderate
appearance	measurement	Quantity	innumerable	innumerable, numerous	moderate	moderate
appearance	measurement	Quantity	two lead	two leads, two lead, dual lead	minimal	minimal
appearance	measurement	Quantity	dual	dual
appearance	measurement	Quantity	9	9	small amount
appearance	measurement	Quantity	five	five		small, smaller
appearance	measurement	Quantity	twice	twice		diameter
appearance	measurement	Quantity	25	25		long
appearance	measurement	Quantity	100	100	various sizes	various sizes
appearance	measurement	Quantity	dual channel	dual channel		width
appearance	measurement	Quantity	scores of	scores of	trace	trace
appearance	measurement	Quantity	x2	x2
appearance	measurement	Quantity	5 unit	5 units	sub cm, subcentimeter	sub cm, subcentrimeter
appearance	measurement	Quantity	92	92
appearance	measurement	Quantity	4	4
appearance	measurement	Quantity	72	72
appearance	measurement	Quantity	2 additional	2 additional
appearance	measurement	Quantity	1 lead	1 lead, lead
appearance	measurement	Quantity	x4	x4
appearance	measurement	Quantity	150s	150s
appearance	measurement	Quantity	80s	80s
appearance	measurement	Quantity	small quantity	small amount, small quantity
appearance	measurement	Quantity	few	few
appearance	measurement	Other description	massive	massive
appearance	measurement	Other description	minimal	minimal
appearance	measurement	Other description	amount	amount
appearance	measurement	Other description	trace	trace
appearance	measurement	Other description	second	second
appearance	measurement	Other description	additional	additional
appearance	measurement	Other description	extensive	extensive
appearance	measurement	Other description	normal	normal
appearance	measurement	Other description	borderline	borderline
appearance	measurement	Other description	decrease	decrease, decreasing, diminished, decreased, reduced
appearance	measurement	Other description	increase	increase, increased
appearance	measurement	Other description	top normal	top normal, upper limits of normal, upper limits normal, upper range of normal
appearance	measurement	Other description	large amount	large amount, abundant
appearance	measurement	Other description	at least	at least
appearance	measurement	Other description	whole	whole
appearance	measurement	Other description	some	some
appearance	measurement	Other description	no larger	no larger, not large, not enlarged
appearance	measurement	Other description	extremely low	extremely low
appearance	measurement	Dimension	baseline Cr 4	baseline cr 4
appearance	measurement	Dimension	large caliber	large caliber
appearance	measurement	Dimension	diameter	diameter
appearance	measurement	Dimension	long	long
appearance	measurement	Dimension	width	width
appearance	measurement	Dimension	dimension	2 cm, 3 cm, 4 cm, 8 cm, 5 cm, 8 mm, 6 cm, 25 cm, 1 cm, 35 cm, 9 mm, 15 cm, 15 mm, 45 cm, 13 mm, 36 cm, 29 cm, 24 cm, 6 mm, 43 cm, 28 cm, 7 cm, 1 to 2 cm, 52 cm, 3-cm, 16 mm, 2 cm, 42 cm, 12-cm, 65 cm, up to 3 mm, 17 cm, 7 mm, 33 cm, 3-cm, 37 cm, 16 cm, 56 cm, 46 cm, 09-cm, 35 cm, 7 cm, 34 cm, 45 cm, 5 cm, 43 cm, 54 cm, 2 cm, 51 cm, 36 cm, 4 cm, 39 cm, approximately 5 cm, 33 cm, 53 cm, 6 cm, 46 cm…
appearance	measurement	Dimension	sub cm	sub cm, subcentrimeter, subcentimeter
appearance	measurement	Dimension	a few centimeter	a few centimeter
appearance	measurement	Size	moderately enlarged	moderately enlarged, mild enlargement, mildly enlarged, moderate enlargement, mild to moderately enlarged
appearance	measurement	Size	massively enlarged	massively enlarged, substantial enlargement, markedly enlarged, severely enlarged
appearance	measurement	Size	low in volume	low in volume
appearance	measurement	Size	minimally lower	minimally lower
appearance	measurement	Other description	slightly low	slightly low
appearance	measurement	Size	minimally enlarged	minimally enlarged, slightly enlarged
appearance	measurement	Size	very large	very large
appearance	measurement	Size	large bore	large bore
appearance	measurement	Size	borderline enlarged	borderline enlarged
appearance	measurement	Dimension	low 80s	low 80s
appearance	measurement	Other description	high	high
level	severity	Mild Severity	mild	milder, mild, mildly
level	severity	Moderate Severity	moderate	moderate, moderately
level	severity	Minimal Severity	minimal	minimal, slight, little, minimally
level	severity	Significant Severity	severe	severe, severely
level	severity	Minimal Severity	slight	slight, little, slightly
level	severity	Significant Severity	substantial	substantial, significant, substantially
level	severity	Mild Severity	mildly enlarge	mildly enlarged
level	severity	Moderate Severity	mild to moderate	mild to moderate, mildly to moderately, mild to moderately
level	severity	Minimal Severity	trace	trace
level	severity	Moderate Severity	small to moderate	small to moderate
level	severity	Moderate Severity	moderately enlarge	moderately enlarged
level	severity	Moderate Severity	moderate to severe	moderate to severe, mod/severe, moderately to severely
level	severity	Significant Severity	marked	marked, prominent, markedly
level	severity	Significant Severity	extensive	extensive
level	severity	Moderate Severity	moderately severe	moderately severe
level	severity	Moderate Severity	moderate to large	moderate to large, moderate to massive, moderate to extensive
level	severity	Extreme Severity	massive	massive
level	severity	Mild Severity	very mild	very mild
level	severity	Moderate Severity	borderline	borderline
level	severity	Minimal Severity	slightly decrease	slightly decreased
level	severity	Extreme Severity	most severe	most severe
level	severity	Significant Severity	high	high
level	severity	Significant Severity	severely	severely
level	severity	Moderate Severity	bad	bad, worst, worse
level	severity	Minimal Severity	minimally increase	minimally increased
level	severity	Moderate Severity	severely enlarge	severely enlarged
level	severity	Mild Severity	mild residual	mild residual
level	severity	Moderate Severity	moderate to moderately large	moderate to moderately large
level	severity	Significant Severity	more severe	more severe
level	severity	Minimal Severity	very slight	very slight
level	severity	Significant Severity	substantially decrease	substantially decreased
level	severity	Minimal Severity	slightly increase	slightly increased
level	severity	Moderate Severity	poor	poor
level	severity	Extreme Severity	extremely low	extremely low
level	severity	Moderate Severity	not substantial	not substantial
level	severity	Mild Severity	less severe	less severe
level	severity	Minimal Severity	early	early
level	severity	Significant Severity	substantially increase	substantially increased
level	severity	Minimal Severity	slightly enlarge	slightly enlarged
level	severity	Extreme Severity	profound	heavy, profound
level	severity	Extreme Severity	stage 4	stage iv
level	severity	Minimal Severity	well	well
level	severity	Moderate Severity	mild to moderately severe	mild to moderately severe
level	severity	Mild Severity	slightly more	slightly more
level	severity	Extreme Severity	near total	near total
level	severity	Moderate Severity	benign	benign
level	severity	Extreme Severity	almost complete	almost complete
level	severity	Mild Severity	small left	small left
level	severity	Minimal Severity	slightly widen	slightly widened
level	severity	Minimal Severity	minimal residual	minimal residual
level	severity	Mild Severity	less	less
level	severity	Minimal Severity	minimally congest	minimally congested
level	severity	Minimal Severity	minimally thicken	minimally thickened
level	severity	Minimal Severity	slightly worsen	slightly worsened
level	severity	Moderate Severity	considerable degree	considerable degree
level	severity	Moderate Severity	slow	slow
level	severity	Significant Severity	substantially less	substantially less
level	severity	Significant Severity	severely low	severely low
level	severity	Minimal Severity	minimally prominent	minimally prominent
level	severity	Mild Severity	no significant	no significant
level	severity	Significant Severity	severity in extent	severity in extent
level	severity	Extreme Severity	extremely poor	extremely poor
level	severity	Minimal Severity	slightly smaller	slightly smaller, minimally smaller
level	severity	Mild Severity	mild right	mild right
level	severity	Moderate Severity	no large	no large
level	severity	Moderate Severity	moderately to severely increase	moderately to severely increased
level	severity	Significant Severity	considerable	considerable
level	severity	Mild Severity	mildly larger	mildly larger
level	severity	Minimal Severity	slight prominence	slight prominence
level	severity	Mild Severity	mildly low	mildly low
level	severity	Minimal Severity	slightly larger	slightly larger
level	severity	Mild Severity	mildly calcify	mildly calcified
level	severity	Moderate Severity	vary degree	varying degrees
level	severity	Minimal Severity	slightly hyperinflated	slightly hyperinflated
level	severity	Minimal Severity	miniscule	miniscule
level	severity	Minimal Severity	slightly less dense	slightly less dense
level	severity	Extreme Severity	very reduce	very reduced
level	severity	Significant Severity	severely increase	severely increasing
level	severity	Moderate Severity	moderately decrease	moderately decreased
level	severity	Moderate Severity	limited	limited
level	severity	Mild Severity	mildly engorge	mildly engorged
level	severity	Extreme Severity	markedly dilate	markedly dilated
level	severity	Mild Severity	mildly prominent	mildly prominent
level	severity	Moderate Severity	borderline enlarge	borderline enlarged
level	severity	Minimal Severity	slightly overdistended	slightly overdistended
level	severity	Extreme Severity	extremely large	extremely large
level	severity	Extreme Severity	very severe	very severe
level	severity	Minimal Severity	minimally less	minimally less
level	severity	Minimal Severity	minimally decrease	minimally decreased
level	severity	Mild Severity	less consolidated	less consolidated
level	severity	Minimal Severity	early acute	early acute
level	severity	Extreme Severity	complete	complete, completely
level	severity	Mild Severity	gentle	gentle
level	comparision	Laterality	left greater than right	left greater than right
level	comparision	Laterality	right greater than left	right greater than left
level	comparision	Laterality	right more than left	right more than left
level	comparision	Laterality	larger on the left side	larger on the left side
level	comparision	Laterality	more prominent on the left	more prominent on the left
level	comparision	Laterality	more prominent on the right	more prominent on the right
level	comparision	Laterality	larger on the right side	larger on the right side
level	comparision	Other description	slightly larger	slightly larger
level	comparision	Laterality	larger on the right	larger on the right
level	comparision	Laterality	right worse than left	right worse than left
level	comparision	Laterality	left more than right	left more than right
level	comparision	Other description	slightly smaller	slightly smaller
level	comparision	Other description	slightly better	slightly better
level	comparision	Other description	better	better
level	comparision	Other description	slightly increase	slightly increased
level	comparision	Laterality	greater on the right	greater on the right
level	comparision	Laterality	more pronounce on the left	more pronounced on the left
level	comparision	Other description	greater than expect	greater than expected
level	comparision	Other description	less prominent	less prominent
level	comparision	Other description	slight decrease	slight decrease
level	comparision	Laterality	more so in the left	more so in the left
level	comparision	Other description	slightly decrease	slightly decreased
level	comparision	Laterality	worse on the right than the left	worse on the right than the left
level	comparision	Other description	now extends	now extends
level	comparision	Laterality	lesser extent in the left low lobe	lesser extent in the left lower lobe
level	comparision	Laterality	more than on the left	more than on the left
level	comparision	Laterality	slightly larger on the left than on the right	slightly larger on the left than on the right
level	comparision	Laterality	greater on the right than left	greater on the right than left
level	comparision	Laterality	lower lung right greater than left	lower lung right greater than left
level	comparision	Laterality	more extensive on the right than left	more extensive on the right than left
level	comparision	Laterality	greater on the right than the left	greater on the right than the left
level	comparision	Laterality	greater on the left	greater on the left
level	comparision	Laterality	in relation to the left lung	in relation to the left lung
level	comparision	Laterality	more medially place	more medially placed
level	comparision	Laterality	more severe on the right	more severe on the right
level	comparision	Laterality	more marked than on the left side	more marked than on the left side
level	comparision	Other description	more	more
level	comparision	Laterality	lesser extent than on the right	lesser extent than on the right
level	comparision	Laterality	more dense on the left	more dense on the left
level	comparision	Other description	slightly more prominent	slightly more prominent
level	comparision	Laterality	compare to the right	compared to the right
level	comparision	Other description	substantially low	substantially lower
level	comparision	Other description	more dense	more dense
level	comparision	Laterality	left much greater than right	left much greater than right
level	comparision	Laterality	asymmetric with the opposite side	asymmetric with the opposite side
level	comparision	Laterality	more prominent in the retrocardiac area than at the right lung base	more prominent in the retrocardiac area than at the right lung base
level	comparision	Laterality	worse on the right	worse on the right
level	comparision	Laterality	compare to the right lung	compared to the right lung
level	comparision	Laterality	more pronounce on the left than the right	more pronounced on the left than the right
level	comparision	Other description	slightly less conspicuous	slightly less conspicuous
level	comparision	Other description	less severe than some	less severe than some
level	comparision	Laterality	more on the left	more on the left
level	comparision	Other description	slightly less	slightly less
level	comparision	Other description	marginally bigger	marginally bigger
level	comparision	Other description	different	different, different manner
level	comparision	Other description	decrease	decrease, decreasing, diminished, decreased, reduced
level	comparision	Other description	increase	increase, increased
temporal	emerge	Acute/Sudden Onset	new	newly, new, newly occurred, not present on the previous examination
temporal	emerge	Acute/Sudden Onset	acute	acute
temporal	emerge	Chronic/Long-term Onset	chronic	chronic, long standing, longstanding
temporal	emerge	Progressive Onset	develop	evolution, developed, evolving, developing, development
temporal	emerge	Chronic/Long-term Onset	old	old, remote
temporal	emerge	Chronic/Long-term Onset	recurrent	recurrent, recurred, recurrence, return, reappearance
temporal	emerge	Progressive Onset	recent	recent
temporal	emerge	Acute/Sudden Onset	early	early, early developing, beginning, very early
temporal	emerge	Progressive Onset	interval	interval
temporal	emerge	Progressive Onset	interval development	interval development, interval appearance
temporal	emerge	Acute/Sudden Onset	sudden onset	sudden onset, sudden
temporal	emerge	Chronic/Long-term Onset	degenerative	degenerative
temporal	emerge	Progressive Onset	interval appearance	interval appearance, interval placement
temporal	emerge	Acute/Sudden Onset	flash	flash
temporal	emerge	Acute/Sudden Onset	now	now
temporal	emerge	Progressive Onset	prior	prior, previous
temporal	emerge	Chronic/Long-term Onset	vary age	varying age
temporal	emerge	Chronic/Long-term Onset	underlie	underlying
temporal	emerge	Acute/Sudden Onset	emergent	emergent
temporal	emerge	Progressive Onset	short interval development	short interval development
temporal	emerge	Progressive Onset	since the last exam	since the last exam, since the previous exam
temporal	emerge	Acute/Sudden Onset	subacute	subacute
temporal	emerge	Progressive Onset	three month ago	three month ago
temporal	emerge	Acute/Sudden Onset	rapid onset	rapid onset, rapidly evolving
temporal	emerge	Acute/Sudden Onset	rapid	rapid
temporal	emerge	Acute/Sudden Onset	newly place	newly placed
temporal	emerge	Progressive Onset	six days ago	six days ago
temporal	emerge	Progressive Onset	since	since
temporal	emerge	Progressive Onset	this morning	this morning
temporal	emerge	Chronic/Long-term Onset	congenital	congenital
temporal	emerge	Progressive Onset	since mid	since mid
temporal	emerge	Progressive Onset	post procedure	post procedure
temporal	emerge	Acute/Sudden Onset	new acute	new acute
temporal	emerge	Acute/Sudden Onset	active	active
temporal	emerge	Progressive Onset	not evident on the prior study	not evident on the prior study
temporal	emerge	Progressive Onset	already at that time	already at that time
temporal	emerge	Progressive Onset	developed over the past 24 hr	developed over the past 24 hr
temporal	emerge	Progressive Onset	3 days	3 days
temporal	emerge	Progressive Onset	blossoming	blossoming
temporal	emerge	Progressive Onset	past two days	past two days
temporal	emerge	Acute/Sudden Onset	early acute	early acute
temporal	emerge	Progressive Onset	2 days ago	2 days ago
temporal	improved	Moderate Improvement	improve	improving, better, improvement, improve, regression, improved, regressed, resolve, improve
temporal	improved	Moderate Improvement	decrease	decreased, decreasing, reduction, diminished, decrease, reduce, interval decrease
temporal	improved	Moderate Improvement	interval improvement	interval improved, interval improvement
temporal	improved	Minimal Improvement	slightly improve	somewhat better, slightly improved, somewhat improved, slight improvement, slight interval improvement
temporal	improved	Minimal Improvement	minimally improve	minimally improving, minimally improved, minimally better
temporal	improved	Minimal Improvement	slightly decrease	slightly decreased, minimally decreased
temporal	improved	Moderate Improvement	resolving	resolving
temporal	improved	Significant Improvement	markedly improve	markedly improve, marked improvement, marked interval improvement
temporal	improved	Moderate Improvement	clearing	clearing, interval clearing
temporal	improved	Moderate Improvement	improve aeration	improved aeration, better aerated
temporal	improved	Moderate Improvement	decrease in size	decrease in size
temporal	improved	Mild Improvement	mildly improve	mildly improve, much improved
temporal	improved	Mild Improvement	less	less
temporal	improved	Mild Improvement	some improvement	some improvement
temporal	improved	Mild Improvement	slight decrease	slight decrease
temporal	improved	Mild Improvement	less prominent	less prominent, less conspicuous, less pronounced, not as pronounced
temporal	improved	Significant Improvement	significant improvement	substantial improvement, significant improvement, greatly improved, significantly improved, substantially improved, improved substantially, very significant improvement, considerable improvement, substantial interval improvement
temporal	improved	Significant Improvement	substantial decrease	decreased substantially, substantial decrease, significantly decrease, substantially decreased
temporal	improved	Moderate Improvement	increase	increased
temporal	improved	Moderate Improvement	better determine	better determined, better defined
temporal	improved	Minimal Improvement	minimal improvement	minimal improvement
temporal	improved	Mild Improvement	less dense	less dense, less radiodense
temporal	improved	Minimal Improvement	decrease slightly	decreased slightly, diminished slightly
temporal	improved	Minimal Improvement	mild regression	mild regression
temporal	improved	Moderate Improvement	continued improvement	continued improvement
temporal	improved	Mild Improvement	probably improve	probably improved
temporal	improved	Minimal Improvement	very minimally decrease	very minimally decreased
temporal	improved	Minimal Improvement	arse for improvement	assess for improvement
temporal	improved	Mild Improvement	slight clearing	slight clearing, some clearing
temporal	improved	Minimal Improvement	barely perceptible	barely perceptible
temporal	improved	Moderate Improvement	improve position	improved position
temporal	improved	Moderate Improvement	better appreciate	better appreciated
temporal	improved	Minimal Improvement	slightly less prominent/small	slightly less prominent/small
temporal	improved	Mild Improvement	mild interval decrease	mild interval decrease
temporal	improved	Extreme Improvement	reexpansion	reexpansion
temporal	improved	Mild Improvement	mild	mild
temporal	improved	Extreme Improvement	very significant improvement	very significant improvement
temporal	improved	Mild Improvement	less prominent than on the previous study	less prominent than on the previous study
temporal	improved	Mild Improvement	less than prior exam	less than prior exam
temporal	improved	Moderate Improvement	better inspiration	better inspiration
temporal	improved	Moderate Improvement	continued improvement/resolution	continued improvement/resolution
temporal	improved	Moderate Improvement	some degree of improvement	some degree of improvement
temporal	improved	Moderate Improvement	partial aeration	partial aeration, more aerated
temporal	improved	Minimal Improvement	slightly less confluent	slightly less confluent
temporal	improved	Mild Improvement	mildly decrease	mildly decreased
temporal	improved	Mild Improvement	mild improvement	mild improvement
temporal	improved	Minimal Improvement	slightly smaller than the prior exam	slightly smaller than the prior exam
temporal	improved	Moderate Improvement	potentially reflect improve ventilation OR higher respiratory pressure	potentially reflecting improved ventilation or higher respiratory pressures
temporal	improved	Minimal Improvement	stable to slightly improve	stable to slightly improved
temporal	improved	Significant Improvement	rapid improvement	rapid improvement
temporal	improved	Moderate Improvement	better expand	better expanded
temporal	improved	Moderate Improvement	general improvement	general improvement
temporal	improved	Moderate Improvement	interval mild improvement	interval mild improvement
temporal	improved	Significant Improvement	further marked reduction	further marked reduction
temporal	improved	Moderate Improvement	decrease in extent and density	decreased in extent and density
temporal	improved	Moderate Improvement	satisfactory	satisfactory
temporal	improved	Moderate Improvement	improve ventilation	improved ventilation
temporal	improved	Moderate Improvement	asymmetrically resolve	asymmetrically resolving
temporal	improved	Moderate Improvement	slowly resolve	slowly resolving
temporal	improved	Moderate Improvement	partially clear	partially cleared, more clear
temporal	improved	Minimal Improvement	potentially minimally improve	potentially minimally improved
temporal	improved	Significant Improvement	further improvement	further improvement
temporal	improved	Significant Improvement	marked regression	marked regression
temporal	improved	Extreme Improvement	progressive decrease	progressive decrease
temporal	improved	Moderate Improvement	heal	healing
temporal	improved	Extreme Improvement	heal	heal, healed, stages of healing
temporal	improved	Minimal Improvement	minimal decrease	minimal decrease
temporal	improved	Moderate Improvement	progression	progression
temporal	improved	Minimal Improvement	minimally less extensive	minimally less extensive
temporal	improved	Extreme Improvement	resolve	resolves, resolution, resolved, resolve, interval resolution, completely resolved, complete resolution
temporal	improved	Extreme Improvement	remove	withdrawn, removed, removal, interval removal, withdrawn completely, eliminate, eliminated, disappeared
temporal	improved	Extreme Improvement	clear	clearance, cleared, cleared up, complete clearing, now clear
temporal	improved	Extreme Improvement	near completely resolve	almost completely resolved, near completely resolved, nearly completely resolved, almost complete resolution
temporal	improved	Extreme Improvement	no longer visualize	no longer seen, no longer visualized, no longer, no longer present, no longer clearly visible, not longer visualized, no longer apparent, no longer any, no longer visible, not clearly seen, no longer appreciated
temporal	improved	Extreme Improvement	near complete	almost complete, near complete, complete, almost completely, almost entirely cleared, substantial clearing
temporal	improved	Extreme Improvement	removal of	removal of
temporal	improved	Extreme Improvement	almost all	almost all
temporal	improved	Extreme Improvement	free	free
temporal	improved	Extreme Improvement	more fully	more fully
temporal	improved	Extreme Improvement	completely reverse	completely reversed
temporal	improved	Extreme Improvement	no remain	no remaining, no longer dilated, not congested anymore
temporal	improved	Extreme Improvement	no evidence	no evidence
temporal	improved	Extreme Improvement	evacuate	evacuated
temporal	improved	Extreme Improvement	complete resolution	complete resolution, absorbed completely
temporal	improved	Extreme Improvement	normalize	normalized, now appears normal
temporal	no change	No Change	unchanged	unaltered, unchanged, constant, unchanged from prior, persistent unchanged, remains unchanged, unchanged from previous examination, no change, no changes, no relevant change, no relevant changes, not change, not changed, no significant interval change, no interval changes, no interval change, no other change, without change, no gross interval change
temporal	no change	Minimal Variation	not significantly change	not substantially changed, not appreciably changed, without appreciable change, not changed appreciably, no appreciable change, no significant superimposed change, no major change, not really changed much, not significantly changed, no significant change, no substantial change, no significant interval change, not significantly different, no substantial difference, grossly unchanged, relatively un…
temporal	no change	Minimal Variation	little change	little changed, little change, minimally changed, minimal change, minimal interval change, little overall change
temporal	no change	No Change	stable	stable, stability, stably
temporal	no change	No Change	again	again, still, again noted, again seen, again visualized, still present, redemonstrated, as seen previously, again appreciated, as on the prior occasion
temporal	no change	No Change	persistent	consistent, consistently, constant, remain present, continued, continues, continue, persisting, persists, persisted, persist, remain, remains, persistent, persistence, persistently, remain present, consistently, continued, continues, continue, persisting, persists, persisted, persist, remain, remains, persistent, persistence, persistently, still persists
temporal	no change	No Change	similar	relatively similar, similar to that seen on, similar as it was before, as before, grossly similar, similar, similar to priors, similar in size from the previous study, similar study of the prior day, similar to prior study, similar to multiple prior exams, similar compared to the study from, similar prior exams, similar to the previous exam, similar to the prior exam, similar to prior examination…
temporal	no change	No Change	no new	no additional newly appeared, no new areas, no new area, no new gross, no new, no newly, no newly occurred, no newly appeared
temporal	no change	No Change	unchanged position	unchanged positions, unaltered position, unchanged position, same position, unchanged in position, remain in place, constant position, not migrated
temporal	no change	No Change	longstanding	longstanding
temporal	no change	Minimal Variation	probably unchanged	likely unchanged, probably unchanged
temporal	no change	No Change	not improve	not improved, not appreciably improved, not improved appreciably, not abated
temporal	no change	No Change	standard position	standard position, standard placement
temporal	no change	Minimal Variation	not acutely change	no acute change, no acute changes, probably not acutely changed, not acutely changed, no acute new, without acute findings, no acute
temporal	no change	No Change	similar position	similar position, remain in place, stable position, without significant change in position
temporal	no change	No Change	not recur	not recurred
temporal	no change	Minimal Variation	no definite	no definite
temporal	no change	No Change	not worsen	not worsened, no interval worsening, no progression, not progressed, no interval progression, no interval development
temporal	no change	No Change	expect	expected
temporal	no change	No Change	the same	the same, essentially the same, remains the same, same, identical
temporal	no change	No Change	no reaccumulation	no reaccumulation
temporal	no change	Minimal Variation	no substantial interval increase	no substantial interval increase, no evidence of significantly increased
temporal	no change	No Change	previously note	as previously noted, as seen on prior radiographs, also seen on the prior study, as on prior study, seen already on previous examination, previously seen, as seen previously, seen on the multiple previous studies, similar to the previous exam, consistent with a previous study, existed already earlier, existed already at that time, as seen on the prior radiograph, as seen on the prior chest radiog…
temporal	no change	No Change	not their overall extent	not their overall extent
temporal	no change	No Change	no decrease	no decrease
temporal	no change	No Change	unchanged extent	unchanged extent
temporal	no change	No Change	no progression	no progression, no appreciable progression, not progressed, no interval progression
temporal	no change	Minimal Variation	change in distribution but not in overall severity	changed in distribution but not in overall severity
temporal	no change	Minimal Variation	wax and wane	waxing and waning
temporal	no change	Minimal Variation	termination not unchanged	termination not unchanged
temporal	no change	No Change	unchanged in size	unchanged in size
temporal	no change	Minimal Variation	neither increase nor decrease	neither increased nor decreased
temporal	no change	Minimal Variation	without significant change	without significant change
temporal	no change	Minimal Variation	probable stability	probable stability
temporal	reposition	Repositioning	pull back	withdrawn, retracted, pullback, pulled back, retracting, retraction, pulled
temporal	reposition	Repositioning	reposition	repositioning, repositioned, reposition, readjustment
temporal	reposition	Repositioning	advanced	advanced
temporal	reposition	Repositioning	replace	replaced
temporal	reposition	Repositioning	pull back slightly	pulled back somewhat, pulled back slightly, partially withdrawn
temporal	reposition	Repositioning	placement	placement, interval placement
temporal	reposition	Repositioning	course cephalad	coursing cephalad
temporal	reposition	Repositioning	now terminates	now terminates
temporal	reposition	Repositioning	slightly more proximally	slightly more proximally
temporal	reposition	Repositioning	displace	displaced
temporal	reposition	Repositioning	newly position	newly positioned
temporal	reposition	Repositioning	loop back	loops back
temporal	reposition	Repositioning	more inferior	more inferior
temporal	reposition	Repositioning	inferior migration	inferior migration
temporal	reposition	Repositioning	more superiorly locate	more superiorly located
temporal	reposition	Repositioning	migrate	migrated
temporal	reposition	Removal	remove	removed
temporal	reposition	Repositioning	migrate outward	migrated outward
temporal	reposition	Repositioning	slightly low	slightly lower, terminating somewhat lower
temporal	reposition	Repositioning	minimally advanced	minimally advanced
temporal	reposition	Repositioning	slightly change position	slightly changed position, changed in position slightly
temporal	reposition	Removal	removal/repositioning	removal/repositioning
temporal	reposition	Repositioning	terminate somewhat low	terminating somewhat lower
temporal	reposition	Repositioning	direct posteriorly	directed posteriorly
temporal	reposition	Repositioning	unusually posteriorly	unusually posteriorly
temporal	reposition	Repositioning	receive	received
temporal	worsened	Moderate Worsening	increase	increased, increase, increasing, interval increase
temporal	worsened	Moderate Worsening	worsen	worsening, worsened, interval worsening, worse, has worsened, worsened in the interval, exaggerated, exacerbation, have worsen
temporal	worsened	Moderate Worsening	progression	progression, progressed, progressing, progressive, interval progression
temporal	worsened	Minimal Worsening	slightly increase	slightly increasing, slightly increased, somewhat increased, minimally increased, increased slightly, increasing slightly, slight increase, mildly increasing, mildly increased, slight interval increase, potentially slightly increased
temporal	worsened	Minimal Worsening	slightly worse	slightly worsening, slightly worsened, slightly worse, minimally worsened, minimally worse, worsened slightly, slight worsening, slight interval worsening, slightly exaggerated, slight deterioration
temporal	worsened	Moderate Worsening	decrease	decreasing, decreased
temporal	worsened	Minimal Worsening	slightly worsen	slightly worsening, slightly worsened
temporal	worsened	Significant Worsening	more prominent	more prominent, more conspicuous, more pronounced, more apparent, more evident, more marked, even more conspicuous
temporal	worsened	Minimal Worsening	slightly larger	slightly bigger, slightly larger
temporal	worsened	Moderate Worsening	more	more
temporal	worsened	Moderate Worsening	enlargement	enlarging, enlarged, enlargement
temporal	worsened	Moderate Worsening	larger	larger, bigger, larger today, bigger today
temporal	worsened	Moderate Worsening	grow	grow, grown
temporal	worsened	Moderate Worsening	greater	greater
temporal	worsened	Minimal Worsening	slightly progress	slightly progressed, slightly progressive, progressed slightly
temporal	worsened	Mild Worsening	slightly more prominent	slightly more pronounced, slightly more conspicuous, slightly more apparent, mildly progressed
temporal	worsened	Significant Worsening	worsen appreciably	worsened appreciably, substantially worse, markedly worsened
temporal	worsened	Moderate Worsening	volume loss	volume loss
temporal	worsened	Significant Worsening	substantially increase	substantially increased, markedly increased, substantial increase
temporal	worsened	Minimal Worsening	slightly decrease	slightly decreased
temporal	worsened	Moderate Worsening	rapid change	rapid change, rapidity of interval change
temporal	worsened	Moderate Worsening	more engorge	more engorged
temporal	worsened	Moderate Worsening	more dense	more denser, more dense
temporal	worsened	Mild Worsening	less	less
temporal	worsened	Moderate Worsening	increase in size	increased in size, worsening size
temporal	worsened	Significant Worsening	extensive	extensive
temporal	worsened	Moderate Worsening	worsen in the interval	worsened in the interval
temporal	worsened	Moderate Worsening	worsen compare to the most recent prior study	worsened compared to the most recent prior study
temporal	worsened	Moderate Worsening	worse or new	worse or new
temporal	worsened	Moderate Worsening	worse compare to the most recent prior study	worse compared to the most recent prior study
temporal	worsened	Moderate Worsening	worrisome for progression	worrisome for progression
temporal	worsened	Significant Worsening	substantially progress	substantially progressed, progressed substantially
temporal	worsened	Moderate Worsening	slowly progress	slowly progressing, progressed slowly, progressed slightly
temporal	worsened	Mild Worsening	slightly more displace	slightly more displaced
temporal	worsened	Mild Worsening	slightly more congest	slightly more congested
temporal	worsened	Mild Worsening	slightly more	slightly more, slightly lower, minimally lower
temporal	worsened	Moderate Worsening	change	change, shifting
temporal	worsened	Minimal Worsening	slightly change	slightly changed
temporal	worsened	Mild Worsening	slight enlargement	slight enlargement
temporal	worsened	Mild Worsening	slight deterioration	slight deterioration
temporal	worsened	Mild Worsening	similar to mildly worsen	similar to mildly worsened
temporal	worsened	Significant Worsening	rapidly worsen	rapidly worsened
temporal	worsened	Significant Worsening	rapid progressive	rapid progressive
temporal	worsened	Extreme Worsening	progress to complete collapse	progressed to complete collapse
temporal	worsened	Moderate Worsening	new/progressing	new/progressing
temporal	worsened	Moderate Worsening	more visible	more visible
temporal	worsened	Moderate Worsening	more vague	more vague
temporal	worsened	Moderate Worsening	more than the prior day	more than the prior day
temporal	worsened	Moderate Worsening	more severe	more severe
temporal	worsened	Moderate Worsening	more pronounce today	more pronounced today
temporal	worsened	Moderate Worsening	more numerous	more numerous
temporal	worsened	Moderate Worsening	more indistinct	more indistinct
temporal	worsened	Moderate Worsening	more distend today	more distended today
temporal	worsened	Moderate Worsening	more confluent	more confluent
temporal	worsened	Mild Worsening	minimally more extensive	minimally more extensive
temporal	worsened	Minimal Worsening	minimally larger	minimally larger
temporal	worsened	Minimal Worsening	minimal	minimally, minimal
temporal	worsened	Significant Worsening	marked enlargement	marked enlargement
temporal	worsened	Moderate Worsening	low than on the prior study	lower than on the prior study
temporal	worsened	Moderate Worsening	likely increase	likely increase
temporal	worsened	Moderate Worsening	less well see	less well seen
temporal	worsened	Moderate Worsening	larger than on the prior exam	larger than on the prior exam
temporal	worsened	Significant Worsening	involve more substantial amount	involving more substantial amount
temporal	worsened	Moderate Worsening	interval development	interval development, developed
temporal	worsened	Moderate Worsening	increase slowly	increasing slowly
temporal	worsened	Moderate Worsening	increase positive pressure	increasing positive pressure
temporal	worsened	Moderate Worsening	increase in volume	increased in volume
temporal	worsened	Moderate Worsening	increase in size from prior	increased in size from prior
temporal	worsened	Moderate Worsening	increase in extension	increased in extension
temporal	worsened	Moderate Worsening	gradually progress	gradually progressing
temporal	worsened	Moderate Worsening	gradual increase	gradual increase
temporal	worsened	Significant Worsening	further enlargement	further enlargement
temporal	worsened	Significant Worsening	further elevation	further elevation
temporal	worsened	Moderate Worsening	evolve	evolving
temporal	worsened	Moderate Worsening	disproportional increase	disproportional increase
temporal	worsened	Moderate Worsening	denser than on the previous image	denser than on the previous image
temporal	worsened	Moderate Worsening	denser than before	denser than before
temporal	worsened	Mild Worsening	denser	denser
temporal	worsened	Moderate Worsening	continue to worsen	continues to worsen
temporal	worsened	Moderate Worsening	continue to develop	continues to develop
temporal	worsened	Moderate Worsening	change configuration	changed configuration
temporal	worsened	Significant Worsening	acutely distend	acutely distended
temporal	worsened	Mild Worsening	a little bit more than	a little bit more than
other info.	other source	Image	CT	ct, ct scanning, ct scan, ct examination
other info.	other source	Image	chest CT	chest ct, ct chest, recent chest ct, concurrent chest ct, prior ct chest, chest ct scans, most recent chest ct
other info.	other source	Image	CT torso	ct torso, ct torso examination, torso ct, ct of the torso
other info.	other source	Image	prior CT	prior ct, recent ct
other info.	other source	Image	cta	cta
other info.	other source	Image	chest cta	chest cta, cta of the chest
other info.	other source	Image	prior chest CT	prior chest ct, prior chest cts
other info.	other source	Image	abdominal CT	abdominal ct, ct abd, ct abdomen
other info.	other source	Image	abdomen/pelvis CT	abdomen/pelvis ct,, ct abdomen/pelvis, ct abdomen and pelvis
other info.	other source	Image	pet CT	pet ct, pet/ct, ct component of pet/ct, pet scan
other info.	other source	Signal	echocardiography	echocardiography
other info.	other source	Image	previous fluoroscopy	previous fluoroscopy
other info.	other source	Image	high re CT	high res ct
other info.	other source	Image	barium examination	barium examination
other info.	other source	Signal	EKG	ekg
other info.	other source	Image	neck CT	neck ct, ct of the neck
other info.	other source	External Source	after thoracentesis	after thoracentesis
other info.	other source	Image	CT scout	ct scout, scout film from prior ct
other info.	other source	External Source	dedicate exam	dedicated exam
other info.	other source	Image	scout radiograph from a torso CT	scout radiograph from a torso ct
other info.	other source	External Source	bal	BAL
other info.	other source	External Source	bronchoscopy	bronchoscopy
other info.	other source	Image	ultrasound	ultrasound
other info.	other source	Image	dedicate clavicular film	dedicated clavicular films
other info.	other source	External Source	medical record	medical record
other info.	other source	Image	prior abdominal radiograph	prior abdominal radiograph, abdominal radiograph
other info.	other source	Signal	vbg	vbg
other info.	other source	Image	shoulder radiograph	shoulder radiographs
other info.	other source	Image	cta torso	cta torso
other info.	other source	External Source	pathology	pathology
other info.	other source	External Source	transbronchial biopsy	transbronchial biopsy
other info.	other source	External Source	outside hospital	outside hospital
other info.	other source	External Source	outside institution	outside institution
other info.	technical limitation	Field of View Limitations	out of view	out of view, out of field of view, off the film, distal end is beyond the view of radiograph, excluded from the field of view, terminates outside the field of view, incompletely imaged, partially imaged, not included in the image, extending off film, tip out of the field of view, tip projects off the inferior borders of the film, right costophrenic angle is excluded from the field of view, extend…
other info.	technical limitation	Evaluation Limitations	limited assessment	limiting evaluation, limits assessment, difficult to assess, evaluation is limited, limited assessment, cannot be assessed, suboptimally assessed, not well evaluated, difficult to discern, difficult to visualize, interpretation difficult, not well appreciated on the current study, radiographically indeterminate, difficult to detect pneumothorax, below the threshold of detection on chest radiograp…
other info.	technical limitation	Patient-related Limitations	patient positioning	limited due to patients body habitus, poor inspiratory effort, patient positioning, patients positioning, patient is rotated with respect to the film, accounting for patient factors, differences in positioning, limited by patients rotation, differences in patient position, significant patient rotation, scoliosis, patient in upright position, patient in supine position, overlying, slight leftward …
other info.	technical limitation	Technical Limitations	single frontal view	single frontal view, nondedicated exam, portable examination, supine radiograph, lordotic technique, motion artifact, underpenetration, rotated positioning, ap view, technically limited examination, supine technique, conventional radiographs, single view, difference in technique, low lung volumes, underpenetrated technique, limitations of the study technique, ap projection, motion
other info.	past hx	past hx	past hx expression	known, recent, chronic, recurrent, prior, history of, longstanding, previous, multiple prior, three months ago, six days ago, past 24 hr, 3 days ago, past two days, 2 days ago, status post, secondary to, diagnosed, clinical history, treated for, post, s/p
