# Supplementary material
Source: ML conference proceedings conference paper supplement (https://openreview.net/forum?id=7kiL7mNrxG)
Supplement: supplementary_material [file entity.xlsx]

## Sheet: entity
raw_data	GT Entity (low-level)	Cat (normalized obs.)	super category	Final_cat	ontology_norm	UMLS_ent	0_spacy_ent_umls	radlex_ent	radlex_ent_code
2-vessel cabg	2-vessel cabg	cabg	Procedures and Surgeries	OTH	coronary artery bypass surgery	coronary artery bypass surgery	C0010055
2-vessel coronary artery bypass surgery	2-vessel coronary artery bypass surgery	2-vessel coronary artery bypass surgery	Procedures and Surgeries	OTH	Coronary Artery Bypass Surgery	Coronary Artery Bypass Surgery	C0010055
3-channel pacer device	3-channel pacer device	3-channel pacer device	Medical Devices	OTH	pacemakers	pacemakers	C0810633	pacemaker	RID5436
40-pack-year smoking	40-pack-year smoking	40-pack-year smoking	Symptoms and Signs	Patient Info.	Smoking	Smoking	C0037369
4v cabg	4v cabg	cabg	Procedures and Surgeries	OTH	coronary artery bypass surgery	coronary artery bypass surgery	C0010055
4v coronary artery bypass surgery	4v coronary artery bypass surgery	4v coronary artery bypass surgery	Procedures and Surgeries	OTH	Coronary Artery Bypass Surgery	Coronary Artery Bypass Surgery	C0010055
a fib	a fib	atrial fibrillation	Diseases and Disorders	NCD	Atrial Fibrillation	Atrial Fibrillation	C0004238
a-fib	a-fib	atrial fibrillation	Diseases and Disorders	NCD	Atrial Fibrillation	Atrial Fibrillation	C0004238
a-flutter	a-flutter	atrial flutter	Diseases and Disorders	NCD	Atrial Flutter	Atrial Flutter	C0004239
abandoned leads	abandoned leads	abandoned leads	Medical Devices	OTH	Leads (device)	Leads (device)	C0181586	lead	RID11924
abd pain	abd pain	abdominal pain	Symptoms and Signs	Patient Info.	Abdominal Pain	Abdominal Pain	C0000737	pain	RID28803
lower abd pain	abd pain	abdominal pain	Symptoms and Signs	Patient Info.	Abdominal Pain	Abdominal Pain	C0000737	abdomen, pain	RID56, RID28803
abdomen drains	abdomen drains	abdomen drain	Medical Devices	OTH	abdomen, surgical drain	Drain device	C0180499	abdomen, surgical drain	RID56, RID5610
abdominal and back pain	abdominal and back pain	abdominal and back pain	Symptoms and Signs	Patient Info.	Back Pain	Back Pain	C0004604	back, pain	RID30781, RID28803
abdominal dialysis	abdominal dialysis	abdominal dialysis	Procedures and Surgeries	OTH
abdominal distention	abdominal distention	abdominal distention	Symptoms and Signs	Patient Info.	Abdominal (qualifier value)	Abdominal (qualifier value)	C5200941
abdominal drain tube	abdominal drain tube	abdominal drain tube	Medical Devices	OTH	Tube drain	Tube drain	C0184114	drainage, tube	RID10417, RID5555
abdominal drains	abdominal drains	abdominal drain	Medical Devices	OTH
abdominal pain	abdominal pain	abdominal pain	Symptoms and Signs	Patient Info.	Abdominal Pain	Abdominal Pain	C0000737	abdomen, pain	RID56, RID28803
lower abdominal pain	abdominal pain	abdominal pain	Symptoms and Signs	Patient Info.	Abdominal Pain	Abdominal Pain	C0000737	abdomen, pain	RID56, RID28803
abdominal pressure	abdominal pressure	abdominal pressure	Symptoms and Signs	Patient Info.	Abdominal pressure	Abdominal pressure	C0429218
abdominal stent	abdominal stent	abdominal stent	Medical Devices	OTH	Stent, device	Stent, device	C0038257	stent	RID5598
abdominal surgeries	abdominal surgeries	abdominal surgery	Procedures and Surgeries	OTH	Abdominal Surgery Patient	Abdominal Surgery Patient	C5206630
abdominal surgery	abdominal surgery	abdominal surgery	Procedures and Surgeries	OTH	Abdominal Surgery Patient	Abdominal Surgery Patient	C5206630
abdominal swelling	abdominal swelling	abdominal swelling	Symptoms and Signs	Patient Info.	Swelling	Swelling	C0038999
abdominal tenderness	abdominal tenderness	abdominal tenderness	Diagnostic Observations	COF	Abdominal tenderness	Abdominal tenderness	C0232498
abnormal anatomy	abnormal anatomy	abnormal anatomy	Anatomical Entities	LF
abnormal appearance	abnormal appearance	abnormal appearance	Diagnostic Observations	LF	Appearance	Appearance	C0700364	appearance	RID49903
abnormal breath sounds	abnormal breath sounds	abnormal breath sound	Diagnostic Observations	COF	Abnormal breath sounds	Abnormal breath sounds	C0231856	abnormal	RID28453
abnormal contour of the right upper mediastinum	abnormal contour	abnormal contour	Diagnostic Observations	LF	contour	Contour form	C0876954	abnormal, contour	RID28453, RID5957
abnormal contours	abnormal contours	abnormal contour	Diagnostic Observations	LF	abnormal, contour	abnormal, Contour form	C0205161, C0876954	abnormal, contour	RID28453, RID5957
abnormal lung exam	abnormal lung exam	abnormal lung exam	Diagnostic Observations	COF	Exam	Exam	C4284036	abnormal	RID28453
abnormalities	abnormalities	abnormality	Diagnostic Observations	LF	Abnormality	Abnormality	C1704258	abnormal	RID28453
acute abnormalities	abnormalities	abnormality	Diagnostic Observations	LF	Abnormality	Abnormality	C1704258	abnormal	RID28453
acute cardiopulmonary abnormalities	abnormalities	abnormality	Diagnostic Observations	LF	Abnormality	Abnormality	C1704258	abnormal	RID28453
basal pulmonary abnormalities	abnormalities	abnormality	Diagnostic Observations	LF	Abnormality	Abnormality	C1704258	abnormal	RID28453
bony abnormalities	abnormalities	abnormality	Diagnostic Observations	LF	Abnormality	Abnormality	C1704258	abnormal	RID28453
cardiopulmonary abnormalities	abnormalities	abnormality	Diagnostic Observations	LF	Abnormality	Abnormality	C1704258	abnormal	RID28453
cardiovascular abnormalities	abnormalities	abnormality	Diagnostic Observations	LF	Abnormality	Abnormality	C1704258	abnormal	RID28453
chest abnormalities	abnormalities	abnormality	Diagnostic Observations	LF	Abnormality	Abnormality	C1704258	abnormal	RID28453
chronic abnormalities	abnormalities	abnormality	Diagnostic Observations	LF	Abnormality	Abnormality	C1704258	abnormal	RID28453
configurational abnormalities	abnormalities	abnormality	Diagnostic Observations	LF	Abnormality	Abnormality	C1704258	abnormal	RID28453
diffuse abnormalities	abnormalities	abnormality	Diagnostic Observations	LF	Abnormality	Abnormality	C1704258	abnormal	RID28453
esophageal abnormalities	abnormalities	abnormality	Diagnostic Observations	LF	Abnormality	Abnormality	C1704258	abnormal	RID28453
focal lung abnormalities	abnormalities	abnormality	Diagnostic Observations	LF	Abnormality	Abnormality	C1704258	abnormal	RID28453
hilar abnormalities	abnormalities	abnormality	Diagnostic Observations	LF	Abnormality	Abnormality	C1704258	abnormal	RID28453
intrathoracic abnormalities	abnormalities	abnormality	Diagnostic Observations	LF	Abnormality	Abnormality	C1704258	abnormal	RID28453
lung abnormalities	abnormalities	abnormality	Diagnostic Observations	LF	Abnormality	Abnormality	C1704258	abnormal	RID28453
mediastinal abnormalities	abnormalities	abnormality	Diagnostic Observations	LF	Abnormality	Abnormality	C1704258	abnormal	RID28453
parenchymal abnormalities	abnormalities	abnormality	Diagnostic Observations	LF	Abnormality	Abnormality	C1704258	abnormal	RID28453
pleural abnormalities	abnormalities	abnormality	Diagnostic Observations	LF	Abnormality	Abnormality	C1704258	abnormal	RID28453
pleural parenchymal abnormalities	abnormalities	abnormality	Diagnostic Observations	LF	Abnormality	Abnormality	C1704258	abnormal	RID28453
pleuroparenchymal abnormalities	abnormalities	abnormality	Diagnostic Observations	LF	Abnormality	Abnormality	C1704258	abnormal	RID28453
post-obstructive abnormalities	abnormalities	abnormality	Diagnostic Observations	LF	Abnormality	Abnormality	C1704258	abnormal	RID28453
pulmonary abnormalities	abnormalities	abnormality	Diagnostic Observations	LF	Abnormality	Abnormality	C1704258	abnormal	RID28453
pulmonary parenchymal abnormalities	abnormalities	abnormality	Diagnostic Observations	LF	Abnormality	Abnormality	C1704258	abnormal	RID28453
rib abnormalities	abnormalities	abnormality	Diagnostic Observations	LF	Abnormality	Abnormality	C1704258	abnormal	RID28453
subhilar and parenchymal abnormalities	abnormalities	abnormality	Diagnostic Observations	LF	Abnormality	Abnormality	C1704258	abnormal	RID28453
vascular abnormalities	abnormalities	abnormality	Diagnostic Observations	LF	Abnormality	Abnormality	C1704258	abnormal	RID28453
abnormality	abnormality	abnormality	Diagnostic Observations	LF	Abnormality	Abnormality	C1704258	intrathoracic	RID11153
abnormality of the heart	abnormality	abnormality	Diagnostic Observations	LF	Abnormality	Abnormality	C1704258	abnormal	RID28453
abnormality of the lung parenchyma	abnormality	abnormality	Diagnostic Observations	LF	Abnormality	Abnormality	C1704258	abnormal	RID28453
abnormality of the mediastinum	abnormality	abnormality	Diagnostic Observations	LF	Abnormality	Abnormality	C1704258	abnormal	RID28453
abnormality of the pleura	abnormality	abnormality	Diagnostic Observations	LF	Abnormality	Abnormality	C1704258	abnormal	RID28453
acute abnormality	abnormality	abnormality	Diagnostic Observations	LF	Abnormality	Abnormality	C1704258	abnormal	RID28453
acute cardiopulmonary abnormality	abnormality	abnormality	Diagnostic Observations	LF	Abnormality	Abnormality	C1704258	abnormal	RID28453
bony abnormality	abnormality	abnormality	Diagnostic Observations	LF	Abnormality	Abnormality	C1704258	abnormal	RID28453
cardiopulmonary abnormality	abnormality	abnormality	Diagnostic Observations	LF	Abnormality	Abnormality	C1704258	abnormal	RID28453
chest abnormality	abnormality	abnormality	Diagnostic Observations	LF	Abnormality	Abnormality	C1704258	intrathoracic	RID11153
chronic abnormality	abnormality	abnormality	Diagnostic Observations	LF	Abnormality	Abnormality	C1704258	abnormal	RID28453
focal pulmonary abnormality	abnormality	abnormality	Diagnostic Observations	LF	Abnormality	Abnormality	C1704258	abnormal	RID28453
hilar abnormality	abnormality	abnormality	Diagnostic Observations	LF	Abnormality	Abnormality	C1704258	abnormal	RID28453
infiltrative abnormality	abnormality	abnormality	Diagnostic Observations	LF	Abnormality	Abnormality	C1704258	abnormal	RID28453
infiltrative pulmonary abnormality	abnormality	abnormality	Diagnostic Observations	LF	Abnormality	Abnormality	C1704258	abnormal	RID28453
intrathoracic abnormality	abnormality	abnormality	Diagnostic Observations	LF	Abnormality	Abnormality	C1704258	abnormal	RID28453
intrinsic diaphragmatic abnormality	abnormality	abnormality	Diagnostic Observations	LF	Abnormality	Abnormality	C1704258	intrathoracic	RID11153
left pleural abnormality	abnormality	abnormality	Diagnostic Observations	LF	Abnormality	Abnormality	C1704258	abnormal	RID28453
lung parenchymal abnormality	abnormality	abnormality	Diagnostic Observations	LF	Abnormality	Abnormality	C1704258	abnormal	RID28453
mediastinal abnormality	abnormality	abnormality	Diagnostic Observations	LF	Abnormality	Abnormality	C1704258	abnormal	RID28453
parenchymal abnormality	abnormality	abnormality	Diagnostic Observations	LF	Abnormality	Abnormality	C1704258	abnormal	RID28453
pleural abnormality	abnormality	abnormality	Diagnostic Observations	LF	Abnormality	Abnormality	C1704258	abnormal	RID28453
pleural perfusion of abnormality	abnormality	abnormality	Diagnostic Observations	LF	Abnormality	Abnormality	C1704258	abnormal	RID28453
preibronchial abnormality	abnormality	abnormality	Diagnostic Observations	LF	Abnormality	Abnormality	C1704258	abnormal	RID28453
pulmonary abnormality	abnormality	abnormality	Diagnostic Observations	LF	Abnormality	Abnormality	C1704258	abnormal	RID28453
reticular abnormality	abnormality	abnormality	Diagnostic Observations	LF	Abnormality	Abnormality	C1704258	abnormal	RID28453
retrocardiac abnormality	abnormality	abnormality	Diagnostic Observations	LF	Abnormality	Abnormality	C1704258	abnormal	RID28453
upper abdominal abnormality	abnormality	abnormality	Diagnostic Observations	LF	Abnormality	Abnormality	C1704258	abnormal	RID28453
vascular abnormality	abnormality	abnormality	Diagnostic Observations	LF	Abnormality	Abnormality	C1704258	abnormal	RID28453
abscess	abscess	abscess	Diseases and Disorders	CF	Abscess	Abscess	C0000833	abscess	RID3711
abscess formation	abscess	abscess	Diseases and Disorders	CF	Abscess	Abscess	C0000833	abscess	RID3711
left forearm abscess	abscess	abscess	Diseases and Disorders	CF	Abscess	Abscess	C0000833	abscess	RID3711
lung abscess	abscess	abscess	Diseases and Disorders	CF	Abscess	Abscess	C0000833	abscess	RID3711
ac joint	ac joint	acromioclavicular joint	Anatomical Entities	LF	Joint Device	Joint Device	C1706309	acromioclavicular joint	RID1895
ac line	ac line	antecubital fossa line	Medical Devices	OTH	lead line	lead line	C0544864	lead	RID11924
ac line placement	ac line	antecubital fossa line	Medical Devices	OTH	lead line	lead line	C0544864	lead	RID11924
acetabular surgery	acetabular surgery	acetabular surgery	Procedures and Surgeries	OTH	Acetabular erosions	Acetabular erosions	C5539737
achalasia	achalasia	achalasia	Diseases and Disorders	CF	Achalasia	Achalasia	C1321756
acidosis	acidosis	acidosis	Diseases and Disorders	COF	Acidosis	Acidosis	C0001122
actinomycosis	actinomycosis	actinomycosis	Diseases and Disorders	CF	Actinomycosis	Actinomycosis	C0001261
active infection	active infection	active infection	Diseases and Disorders	CF	Infection	Infection	C3714514	infection	RID3710
active tb	active tb	active tuberculosis	Diseases and Disorders	CF	Active tuberculosis	Active tuberculosis	C0151332	tuberculosis	RID29116
active tuberculosis	active tuberculosis	active tuberculosis	Diseases and Disorders	CF	Active tuberculosis	Active tuberculosis	C0151332	tuberculosis	RID29116
acute ams	acute ams	acute altered mental status	Symptoms and Signs	Patient Info.	ABLEPHARON-MACROSTOMIA SYNDROME	ABLEPHARON-MACROSTOMIA SYNDROME	C1860224
acute appendicitis	acute appendicitis	acute appendicitis	Diseases and Disorders	NCD	Acute perforated appendicitis	Acute perforated appendicitis	C0564755
acute change in mental status	acute change in mental status	acute change in mental status	Symptoms and Signs	Patient Info.	Mental Status Change	Mental Status Change	C0856054	change	RID49896
acute decompensation	acute decompensation	decompensation	Diseases and Disorders	CF	Decompensation	Decompensation	C0231187
acute disease	acute disease	acute disease	Diseases and Disorders	CF	Acute Disease	Acute Disease	C0001314
acute exacerbation	acute exacerbation	acute exacerbation	Diagnostic Observations	CF	exacerbation acute	exacerbation acute	C0743630
acute kidney insufficiency	acute kidney insufficiency	acute kidney insufficiency	Diseases and Disorders	NCD	Acute Kidney Insufficiency	Acute Kidney Insufficiency	C1565662
acute mental status change	acute mental status change	acute mental status change	Symptoms and Signs	Patient Info.	Mental Status Change	Mental Status Change	C0856054	change	RID49896
acute myelocytic leukemia	acute myelocytic leukemia	acute myelocytic leukemia	Diseases and Disorders	NCD	Leukemia, Myelocytic, Acute	Leukemia, Myelocytic, Acute	C0023467
acute myocardial infarction	acute myocardial infarction	acute myocardial infarction	Diseases and Disorders	NCD	Acute myocardial infarction	Acute myocardial infarction	C0155626	myocardial infarction	RID3236
acute renal failure	acute renal failure	acute renal failure	Diseases and Disorders	NCD	Kidney Failure	Kidney Failure	C0035078
acute respiratory distress	acute respiratory distress	acute respiratory distress	Diseases and Disorders	CF	Acute respiratory distress	Acute respiratory distress	C0748355
acute respiratory failure	acute respiratory failure	acute respiratory failure	Diseases and Disorders	CF	Acute respiratory failure	Acute respiratory failure	C0264490
additional tubing	additional tubing	additional tubing	Medical Devices	OTH	Tubing	Tubing	C0184165
adenocarcinoma	adenocarcinoma	adenocarcinoma	Diseases and Disorders	CF	Adenocarcinoma	Adenocarcinoma	C0001418	adenocarcinoma	RID4226
adenocarcinoma of the esophagus	adenocarcinoma	adenocarcinoma	Diseases and Disorders	CF	Adenocarcinoma	Adenocarcinoma	C0001418	adenocarcinoma	RID4226
adenocarcinoma of the lungs	adenocarcinoma of the lungs	adenocarcinoma	Diseases and Disorders	CF	Adenocarcinoma	Adenocarcinoma	C0001418	adenocarcinoma	RID4226
adenopathy	adenopathy	adenopathy	Diseases and Disorders	CF	adenopathy
central adenopathy	adenopathy	adenopathy	Diseases and Disorders	CF	adenopathy
hilar adenopathy	adenopathy	adenopathy	Diseases and Disorders	CF	adenopathy
mediastinal adenopathy	adenopathy	adenopathy	Diseases and Disorders	CF	adenopathy
mediastinal right-sided adenopathy	adenopathy	adenopathy	Diseases and Disorders	CF	adenopathy
right hilar adenopathy	adenopathy	adenopathy	Diseases and Disorders	CF	adenopathy
right mediastinal adenopathy	adenopathy	adenopathy	Diseases and Disorders	CF	adenopathy
advanced heart failure	advanced heart failure	heart failure	Diseases and Disorders	CF	Heart failure	Heart failure	C0018801	heart failure	RID34795
advanced lung cancer	advanced lung cancer	advanced lung cancer	Diseases and Disorders	CF	advanced lung cancer	advanced lung cancer	C4524268
adventitial breath sounds	adventitial breath sounds	adventitial breath sound	Diagnostic Observations	COF	Abnormal breath sounds	Abnormal breath sounds	C0231856
aeration	aeration	aeration	Diagnostic Observations	PF	aeration	aeration	C2215609
aeration of lungs	aeration	aeration	Diagnostic Observations	PF	aeration	aeration	C2215609
aeration of the apices	aeration	aeration	Diagnostic Observations	PF	aeration	aeration	C2215609
aeration of the lung bases	aeration	aeration	Diagnostic Observations	PF	aeration	aeration	C2215609
aeration of the lungs	aeration	aeration	Diagnostic Observations	PF	aeration	aeration	C2215609
aeration of the right lung	aeration	aeration	Diagnostic Observations	PF	aeration	aeration	C2215609
base aeration	aeration	aeration	Diagnostic Observations	PF	aeration	aeration	C2215609
basilar aeration	aeration	aeration	Diagnostic Observations	PF	aeration	aeration	C2215609
bibasilar aeration	aeration	aeration	Diagnostic Observations	PF	aeration	aeration	C2215609
lung aeration	aeration	aeration	Diagnostic Observations	PF	aeration	aeration	C2215609
pulmonary aeration	aeration	aeration	Diagnostic Observations	PF	aeration	aeration	C2215609
af	af	atrial fibrillation	Diseases and Disorders	NCD	Atrial Fibrillation	Atrial Fibrillation	C0004238
afebrile	afebrile	atrial fibrillation	Diseases and Disorders	NCD	Atrial Fibrillation	Atrial Fibrillation	C0004238
affected areas	affected areas	affected area	Diagnostic Observations	PF	Affected Area	Affected Area	C1879646
afib	afib	atrial fibrillation	Diseases and Disorders	NCD	Atrial Fibrillation	Atrial Fibrillation	C0004238
afib rvr	afib rvr	afib rvr	Diseases and Disorders	NCD	Atrial Fibrillation	Atrial Fibrillation	C0004238
afib with rvr	afib with rvr	atrial fibrillation with rapid ventricular response	Diseases and Disorders	NCD	Atrial Fibrillation	Atrial Fibrillation	C0004238
aflutter	aflutter	atrial flutter	Diseases and Disorders	NCD	Atrial Flutter	Atrial Flutter	C0004239
aggressive diuresis	aggressive diuresis	aggressive diuresis	Treatment and Medications	Patient Info.
agitated	agitated	agitate	Symptoms and Signs	Patient Info.	Agitation	Agitation	C0085631
agitation	agitation	agitation	Symptoms and Signs	Patient Info.	Agitation	Agitation	C0085631
aicd	aicd	AICD	Medical Devices	OTH
aicd device	aicd	AICD	Medical Devices	OTH	Automatic Implantable Cardioverter-Defibrillators	Automatic Implantable Cardioverter-Defibrillators	C0972395
aicd firing	aicd firing	AICD firing	Procedures and Surgeries	OTH
aicd and its leads	aicd lead	AICD lead	Medical Devices	OTH	Leads (device)	Leads (device)	C0181586	lead	RID11924
aicd device leads	aicd lead	AICD lead	Medical Devices	OTH	Leads (device)	Leads (device)	C0181586	lead	RID11924
aicd lead	aicd lead	AICD lead	Medical Devices	OTH	Leads (device)	Leads (device)	C0181586	lead	RID11924
aicd/pacemaker device	aicd/pacemaker device	aicd/pacemaker device	Medical Devices	OTH	pacemakers	pacemakers	C0810633	pacemaker	RID5436
aids	aids	AIDS	Diseases and Disorders	NCD	Acquired Immunodeficiency Syndrome	Acquired Immunodeficiency Syndrome	C0001175
air	air	air	Diagnostic Observations	PF	air	air	C3536832
air in the pleural cavity	air	air	Diagnostic Observations	PF	air	air	C3536832
air under the right hemidiaphragm	air	air	Diagnostic Observations	PF	air	air	C3536832
air within the fundus	air	air	Diagnostic Observations	PF	air	air	C3536832
air within the neoesophagus	air	air	Diagnostic Observations	PF	air	air	C3536832
deep cervical air	air	air	Diagnostic Observations	PF	air	air	C3536832
intraabdominal air	air	air	Diagnostic Observations	PF	air	air	C3536832
loculated air	air	air	Diagnostic Observations	PF	air	air	C3536832
mediastinal air	air	air	Diagnostic Observations	PF	air	air	C3536832
pleural air	air	air	Diagnostic Observations	PF	air	air	C3536832
subcutaneous air	air	air	Diagnostic Observations	PF	air	air	C3536832
subdiaphragmatic air	air	air	Diagnostic Observations	PF	air	air	C3536832
subq air	air	air	Diagnostic Observations	PF	air	air	C3536832
air and fluid collection	air and fluid collection	air-fluid collection	Diagnostic Observations	PF	Pleural fluid, Collection (action)	Pleural fluid, Collection (action)	C0225778, C1516698	fluid	RID1547
anterior air and fluid collection	air and fluid collection	air-fluid collection	Diagnostic Observations	PF	Pleural fluid, Collection (action)	Pleural fluid, Collection (action)	C0225778, C1516698	fluid	RID1547
air bronchogram	air bronchogram	air bronchogram	Diagnostic Observations	PF	Air bronchogram on radiograph (finding)	Air bronchogram on radiograph (finding)	C3669021	air bronchogram sign	RID34999
air bronchograms	air bronchograms	air bronchogram	Diagnostic Observations	PF	Air bronchogram on radiograph (finding)	Air bronchogram on radiograph (finding)	C3669021	air bronchogram sign	RID34999
air bubble	air bubble	air bubble	Diagnostic Observations	PF	air bubble	air bubble	C0001863
gastric air bubble	air bubble	air bubble	Diagnostic Observations	PF	air bubble	air bubble	C0001863
air collection	air collection	air collection	Diagnostic Observations	PF	Collection (action)	Collection (action)	C1516698
pleural air collection	air collection	air collection	Diagnostic Observations	PF	Collection (action)	Collection (action)	C1516698
soft tissue air collection	air collection	air collection	Diagnostic Observations	PF	Collection (action)	Collection (action)	C1516698
air collections	air collections	air collection	Diagnostic Observations	PF	Collection (action)	Collection (action)	C1516698
loculated air collections	air collections	air collection	Diagnostic Observations	PF	Collection (action)	Collection (action)	C1516698
soft tissue air collections	air collections	air collection	Diagnostic Observations	PF	Collection (action)	Collection (action)	C1516698
subcutaneous air collections	air collections	air collection	Diagnostic Observations	PF	Collection (action)	Collection (action)	C1516698
air component	air component	air component	Diagnostic Observations	PF	Component object	Component object	C0449432
air component of the hydropneumothorax	air component of the hydropneumothorax	air component of the hydropneumothorax	Diseases and Disorders	PF	Component object	Component object	C0449432
air distended bowel	air distended bowel	air distended bowel	Diagnostic Observations	LF	distended	Distended	C4082695	distended	RID5787
air fluid level	air fluid level	air-fluid level	Diagnostic Observations	PF	Pleural fluid, Levels (qualifier value)	Pleural fluid, Levels (qualifier value)	C0225778, C0441889	fluid	RID1547
air fluid levels	air fluid levels	air-fluid level	Diagnostic Observations	PF	Pleural fluid, Levels (qualifier value)	Pleural fluid, Levels (qualifier value)	C0225778, C0441889	fluid	RID1547
air inclusion	air inclusion	air inclusion	Diagnostic Observations	PF	Inclusion	Inclusion	C1512693
air inclusions	air inclusions	air inclusion	Diagnostic Observations	PF	Inclusion	Inclusion	C1512693
soft tissue air inclusions	air inclusions	air inclusion	Diagnostic Observations	PF	Inclusion	Inclusion	C1512693
air leak	air leak	air leak	Diagnostic Observations	COF	Testers, Endoscope, Air Leak	Testers, Endoscope, Air Leak	C2363548
air-fluid collection	air-fluid collection	air-fluid collection	Diagnostic Observations	PF	Pleural fluid, Collection (action)	Pleural fluid, Collection (action)	C0225778, C1516698	fluid	RID1547
air-fluid level	air-fluid level	air-fluid level	Diagnostic Observations	PF	Pleural fluid, Levels (qualifier value)	Pleural fluid, Levels (qualifier value)	C0225778, C0441889	fluid	RID1547
air-fluid levels	air-fluid levels	air-fluid level	Diagnostic Observations	PF	Pleural fluid, Levels (qualifier value)	Pleural fluid, Levels (qualifier value)	C0225778, C0441889	fluid	RID1547
airfluid level	airfluid level	air-fluid level	Diagnostic Observations	PF	Pleural fluid, Levels (qualifier value)	Pleural fluid, Levels (qualifier value)	C0225778, C0441889	fluid	RID1547
airless	airless	airless	Diagnostic Observations	PF	Rats, Hairless	Rats, Hairless	C1956050
airspace	airspace	airspace	Anatomical Entities	LF				airspace	RID28538
retrosternal airspace	airspace	airspace	Anatomical Entities	LF				airspace	RID28538
airspace disease	airspace disease	airspace disease	Diseases and Disorders	CF	airway disease	airway disease	C0699949	airway	RID1245
airway	airway	airway	Anatomical Entities	LF	Airway structure	Airway structure	C0458827	airway	RID1245
airway to the left lower lobe bronchus	airway	airway	Anatomical Entities	LF	Airway structure	Airway structure	C0458827	airway	RID1245
airway disease	airway disease	airway disease	Diseases and Disorders	CF	airway disease	airway disease	C0699949
airway obstruction	airway obstruction	airway obstruction	Diseases and Disorders	CF	Airway Obstruction	Airway Obstruction	C0001883	obstruction	RID4962
airway stent	airway stent	airway stent	Medical Devices	OTH	Airway structure	Airway structure	C0458827	airway	RID1245
airways	airways	airways	Anatomical Entities	LF	Airway structure	Airway structure	C0458827	airway	RID1245
dilated airways	airways	airways	Anatomical Entities	LF	Airway structure	Airway structure	C0458827	airway	RID1245
alcohol abuse	alcohol abuse	alcohol abuse	Diseases and Disorders	Patient Info.	Alcohol abuse	Alcohol abuse	C0085762
alcoholic cirrhosis	alcoholic cirrhosis	alcoholic cirrhosis	Diseases and Disorders	NCD	Alcoholic Cirrhosis with Ascites	Alcoholic Cirrhosis with Ascites	C3509286
alignment of sternal wires	alignment of sternal wires	alignment	Procedures and Surgeries	OTH	alignment	alignment	C1706765
alignment of the pacemaker wires	alignment of the pacemaker wires	alignment of the pacemaker wire	Medical Devices	OTH	alignment	alignment	C1706765
alignment of the sternal wires	alignment of the sternal wires	alignment of the sternal wire	Medical Devices	OTH	alignment	alignment	C1706765
allergic asthma	allergic asthma	allergic asthma	Diseases and Disorders	NCD	Allergic asthma	Allergic asthma	C0155877
allergic reaction	allergic reaction	allergic reaction	Diseases and Disorders	NCD	Allergic Reaction	Allergic Reaction	C1527304
allogenic transplant	allogenic transplant	allogenic transplant	Procedures and Surgeries	OTH	Allograft surgical material	Allograft surgical material	C0450127
allograft	allograft	allograft	Medical Devices	OTH	Skin allograft	Skin allograft	C0440814
alterations	alterations	alteration	Diagnostic Observations	LF	Alteration	Alteration	C1515926
lung parenchymal alterations	alterations	alteration	Diagnostic Observations	LF	Alteration	Alteration	C1515926
parenchymal alterations	alterations	alteration	Diagnostic Observations	LF	Alteration	Alteration	C1515926
altered mental status	altered mental status	altered mental status	Symptoms and Signs	Patient Info.	Mental Status Change	Mental Status Change	C0856054
alveolar edema	alveolar edema	alveolar edema	Diseases and Disorders	CF	Edema	Edema	C0013604	edema	RID4865
amio-induced lung injury	amio-induced lung injury	amiodarone injury	Diseases and Disorders	CF	Lung Injury	Lung Injury	C0273115
amiodarone lung toxicity	amiodarone lung toxicity	amiodarone toxicity	Diseases and Disorders	CF	Toxicity aspects	Toxicity aspects	C0040539
amiodarone therapy	amiodarone therapy	amiodarone therapy	Treatment and Medications	Patient Info.	gene therapy	gene therapy	C0017296
amiodarone toxicity	amiodarone toxicity	amiodarone toxicity	Diseases and Disorders	CF	Toxicity aspects	Toxicity aspects	C0040539
amiodarone toxicity screening	amiodarone toxicity screening	amiodarone toxicity screening	Procedures and Surgeries	Patient Info.	Screening procedure	Screening procedure	C0220908	screening	RID28817
amiodarone-induced lung toxicity	amiodarone-induced lung toxicity	amiodarone toxicity	Diseases and Disorders	CF	Toxicity aspects	Toxicity aspects	C0040539
amiodarone-induced pulmonary toxicity	amiodarone-induced pulmonary toxicity	amiodarone toxicity	Diseases and Disorders	CF	Toxicity aspects	Toxicity aspects	C0040539
aml	aml	acute myelocytic leukemia	Diseases and Disorders	NCD	Leukemia, Myelocytic, Acute	Leukemia, Myelocytic, Acute	C0023467
ams	ams	altered mental status	Symptoms and Signs	Patient Info.	ABLEPHARON-MACROSTOMIA SYNDROME	ABLEPHARON-MACROSTOMIA SYNDROME	C1860224
anaphylaxis	anaphylaxis	anaphylaxis	Diseases and Disorders	NCD	anaphylaxis	anaphylaxis	C0002792
anastomotic stricture	anastomotic stricture	anastomotic stricture	Diseases and Disorders	PF	Esophageal anastomotic stricture	Esophageal anastomotic stricture	C0341583	stricture	RID5022
anatomic distortion of the chest cage	anatomic distortion	distortion	Diagnostic Observations	LF	Distention	Distention	C3714614
anatomic stricture	anatomic stricture	anatomic stricture	Diseases and Disorders	PF	anatomic	anatomic	C0220784	stricture	RID5022
anchor	anchor	anchor	Medical Devices	OTH	Anchor	Anchor	C3854239
anchors	anchors	anchor	Medical Devices	OTH	ANCHOR Health-Related Symptom Index	ANCHOR Health-Related Symptom Index	C5553006
anemia	anemia	anemia	Diseases and Disorders	NCD	Anemia	Anemia	C0002871
anemic	anemic	anemic	Diagnostic Observations	COF	Anemic pallor	Anemic pallor	C4025811
aneurysm	aneurysm	aneurysm	Diseases and Disorders	PF	Aneurysm	Aneurysm	C0002940	aneurysm	RID3321
aortic aneurysm	aneurysm	aneurysm	Diseases and Disorders	PF	Aneurysm	Aneurysm	C0002940	aneurysm	RID3321
focal aneurysm	aneurysm	aneurysm	Diseases and Disorders	PF	Aneurysm	Aneurysm	C0002940	aneurysm	RID3321
angio	angio	angio	Procedures and Surgeries	OTH	Angio	Angio	C4071827
ankylosing spondylitis	ankylosing spondylitis	ankylosing spondylitis	Diseases and Disorders	CF	Ankylosing spondylitis	Ankylosing spondylitis	C0038013	ankylosing spondylitis	RID3604
anorexia	anorexia	anorexia	Symptoms and Signs	Patient Info.	Anorexia	Anorexia	C0003123
anterior cervical fusion	anterior cervical fusion	anterior cervical fusion	Procedures and Surgeries	OTH	anterior, fusion	Cervical	C0205064	anterior, fusion	RID5818, RID3800
anterior cervical spine fusion device	anterior cervical spine fusion device	anterior cervical spine fusion device	Medical Devices	OTH	medical devices	medical devices	C0025080	anterior, fusion	RID5818, RID3800
anterior fusion hardware	anterior fusion hardware	anterior fusion hardware	Medical Devices	OTH	anterior, fusion	Anterior	C0205094	anterior, fusion	RID5818, RID3800
anterior spinal fixation	anterior spinal fixation	anterior spinal fixation	Procedures and Surgeries	OTH	Structure of anterior spinal artery	Psychological fixation	C0728733
anterior wedge compression deformity	anterior wedge compression deformity	anterior wedge compression deformity	Diagnostic Observations	PF	Deformity	Deformity	C0302142	deformity	RID39218
anterior wedging	anterior wedging	anterior wedging	Diagnostic Observations	PF	Anterior	Anterior	C0205094	anterior	RID5818
antibiotic therapy	antibiotic therapy	antibiotic therapy	Treatment and Medications	Patient Info.	Antibiotic therapy	Antibiotic therapy	C0338237	antibiotic	RID49438
antibiotics	antibiotics	antibiotic	Treatment and Medications	OTH	Antibiotic throat preparations	Antibiotic throat preparations	C3540706	antibiotic	RID49438
antrectomy	antrectomy	antrectomy	Procedures and Surgeries	OTH	Gastric Antrectomy	Gastric Antrectomy	C0565315	antrectomy	RID1609
anuria	anuria	anuria	Symptoms and Signs	Patient Info.	Anuria	Anuria	C0003460
anuric esrd	anuric esrd	anuric end stage renal disease	Diseases and Disorders	NCD	chronic kidney disease	chronic kidney disease	C0022661
anxiety	anxiety	anxiety	Diseases and Disorders	Patient Info.	Anxiety	Anxiety	C0003467
aorta	aorta	aorta	Anatomical Entities	LF	Aorta	Aorta	C0003483	aorta	RID480
calcified aorta	aorta	aorta	Anatomical Entities	LF	Aorta	Aorta	C0003483	aorta	RID480
tortuous aorta	aorta	aorta	Anatomical Entities	LF	Aorta	Aorta	C0003483	aorta	RID480
aortic arch	aortic arch	aortic arch	Anatomical Entities	LF	Aortic arch structure	Aortic arch structure	C0003489	aortic arch	RID581
calcified aortic arch	aortic arch	aortic arch	Anatomical Entities	LF	Aortic arch structure	Aortic arch structure	C0003489	aortic arch	RID581
dilated aortic arch	aortic arch	aortic arch	Anatomical Entities	LF	Aortic arch structure	Aortic arch structure	C0003489	aortic arch	RID581
aortic dissection	aortic dissection	aortic dissection	Diseases and Disorders	CF	Dissection of aorta	Dissection of aorta	C0340643	aortic dissection	RID3320
aortic knob	aortic knob	aortic knob	Anatomical Entities	LF	x-ray of chest: prominent aortic knob	x-ray of chest: prominent aortic knob	C2073637
aortic prosthesis	aortic prosthesis	aortic prosthesis	Medical Devices	OTH	Aortic valve prosthesis	Aortic valve prosthesis	C0182431	aortic valve, prosthesis	RID1394, RID28823
aortic replacement	aortic replacement	aortic replacement	Procedures and Surgeries	OTH	replacement of aortic valve (procedure)	replacement of aortic valve (procedure)	C0003506	aortic valve, device replacement	RID1394, RID49857
aortic valve	aortic valve	aortic valve	Anatomical Entities	LF	Aortic valve structure	Aortic valve structure	C0003501	aortic valve	RID1394
aortic valve prosthesis	aortic valve prosthesis	aortic valve prosthesis	Medical Devices	OTH	Aortic valve prosthesis	Aortic valve prosthesis	C0182431	aortic valve, prosthesis	RID1394, RID28823
aortic valve repair	aortic valve repair	aortic valve repair	Procedures and Surgeries	OTH	aortic valve, repair	heart - aortic valve: repair	C0869750	aortic valve, repair	RID1394, RID10407
aortic valve replacement	aortic valve replacement	aortic valve replacement	Procedures and Surgeries	OTH	replacement of aortic valve (procedure)	replacement of aortic valve (procedure)	C0003506	aortic valve, device replacement	RID1394, RID49857
aortic valve replacement bioprosthetic	aortic valve replacement bioprosthetic	aortic valve replacement bioprosthetic	Procedures and Surgeries	OTH	replacement of aortic valve (procedure)	replacement of aortic valve (procedure)	C0003506	aortic valve, device replacement	RID1394, RID49857
aortic valve surgery	aortic valve surgery	aortic valve surgery	Procedures and Surgeries	OTH	Aortic Valve Surgery	Aortic Valve Surgery	C4763855
aortopulmonary window	aortopulmonary window	aortopulmonary window	Anatomical Entities	LF	aortopulmonary window	construction of aortopulmonary window	C0397548	aortopulmonary window	RID1444
ap diameter	ap diameter	ap diameter	Diagnostic Observations	LF	diameter (qualifier value)	diameter (qualifier value)	C1301886	diameter	RID13432
ap portable upright view	ap portable upright view	view	Procedures and Surgeries	OTH	View	View	C0449911
ap portable upright view	ap portable upright view	view	Procedures and Surgeries	OTH	View	View	C0449911
ap window	ap window	ap window	Anatomical Entities	LF	aortopulmonary window	construction of aortopulmonary window	C0397548	aortopulmonary window	RID1444
apex	apex	apex	Anatomical Entities	LF	apical	Apical	C0205111	apical	RID5833
apical lung	apical lung	apical lung	Anatomical Entities	LF	apical	Apical	C0205111	apical	RID5833
apical lung regions	apical lung	apical lung	Anatomical Entities	LF	apical	Apical	C0205111	apical	RID5833
apices	apices	apex	Anatomical Entities	LF	apical	Apical	C0205111	apical	RID5833
apices of the lungs	apices of the lungs	apices of the lung	Anatomical Entities	LF	apical	Apical	C0205111	apical	RID5833
apparatus	apparatus	apparatus	Medical Devices	OTH	manufactured apparatus	manufactured apparatus	C0243111
appearance	appearance	appearance	Diagnostic Observations	LF	Appearance	Appearance	C0700364	appearance	RID49903
appearance after surgery	appearance	appearance	Diagnostic Observations	LF	Appearance	Appearance	C0700364	appearance	RID49903
appearance of the chest	appearance	appearance	Diagnostic Observations	LF	Appearance	Appearance	C0700364	appearance	RID49903
appearance of the heart	appearance	appearance	Diagnostic Observations	LF	Appearance	Appearance	C0700364	appearance	RID49903
appearance of the left postoperative lung	appearance	appearance	Diagnostic Observations	LF	Appearance	Appearance	C0700364	appearance	RID49903
appearance of the lungs	appearance	appearance	Diagnostic Observations	LF	Appearance	Appearance	C0700364	appearance	RID49903
appearance of the mediastinum	appearance	appearance	Diagnostic Observations	LF	Appearance	Appearance	C0700364	appearance	RID49903
appearance of the right lower lung	appearance	appearance	Diagnostic Observations	LF	Appearance	Appearance	C0700364	appearance	RID49903
appearance of the right lung	appearance	appearance	Diagnostic Observations	LF	Appearance	Appearance	C0700364	appearance	RID49903
asymmetric appearance	appearance	appearance	Diagnostic Observations	LF	Appearance	Appearance	C0700364	appearance	RID49903
chest appearance	appearance	appearance	Diagnostic Observations	LF	Appearance	Appearance	C0700364	appearance	RID49903
hazy appearance	appearance	appearance	Diagnostic Observations	LF	Appearance	Appearance	C0700364	appearance	RID49903
heart appearance	appearance	appearance	Diagnostic Observations	LF	Appearance	Appearance	C0700364	appearance	RID49903
hyperdense appearance	appearance	appearance	Diagnostic Observations	LF	Appearance	Appearance	C0700364	appearance	RID49903
lung appearance	appearance	appearance	Diagnostic Observations	LF	Appearance	Appearance	C0700364	appearance	RID49903
pulmonary appearance	appearance	appearance	Diagnostic Observations	LF	Appearance	Appearance	C0700364	appearance	RID49903
radiographic appearance	appearance	appearance	Diagnostic Observations	LF	Appearance	Appearance	C0700364	appearance	RID49903
radiographic appearance of the thoracic organs	appearance	appearance	Diagnostic Observations	LF	Appearance	Appearance	C0700364	appearance	RID49903
appearance and fullness	appearance and fullness	appearance and fullness	Diagnostic Observations	LF	Appearance	Appearance	C0700364	appearance	RID49903
ill-defined appearance and fullness	appearance and fullness	appearance and fullness	Diagnostic Observations	LF	Appearance	Appearance	C0700364	appearance	RID49903
appearances	appearances	appearance	Diagnostic Observations	LF	Appearance	Appearance	C0700364	appearance	RID49903
appendicitis	appendicitis	appendicitis	Diseases and Disorders	NCD	Appendicitis	Appendicitis	C0003615
architectural distortion	architectural distortion	architectural distortion	Diagnostic Observations	LF	Architectural Distortion	Architectural Distortion	C2826609	architectural distortion	RID34261
parenchymal architectural distortion	architectural distortion	architectural distortion	Diagnostic Observations	LF	Architectural Distortion	Architectural Distortion	C2826609	architectural distortion	RID34261
ards	ards	acute respiratory distress syndrome	Diseases and Disorders	CF	Respiratory Distress Syndrome, Adult	Respiratory Distress Syndrome, Adult	C0035222
area	area	area	Diagnostic Observations	LF	Area	area	C0205146
retrocardiac area	area	area	Diagnostic Observations	LF	Area	area	C0205146
areas	areas	area	Diagnostic Observations	LF	Area	area	C0205146
areas of increased translucency	areas	area	Diagnostic Observations	LF	Area	area	C0205146
coalescent areas	areas	area	Diagnostic Observations	LF	Area	area	C0205146
areas of fibrosis	areas of fibrosis	fibrosis	Diseases and Disorders	PF	Fibrosis	Fibrosis	C0016059	fibrosis	RID3820
areas of fibrosis	areas of fibrosis	fibrosis	Diseases and Disorders	PF	Fibrosis	Fibrosis	C0016059	fibrosis	RID3820
perihilar areas of fibrosis	areas of fibrosis	fibrosis	Diseases and Disorders	PF	Fibrosis	Fibrosis	C0016059	fibrosis	RID3820
argatroban	argatroban	argatroban	Treatment and Medications	OTH	argatroban	argatroban	C0048470
arms	arms	arm	Anatomical Entities	LF	arm			arm	RID1968
arrest	arrest	arrest	Diseases and Disorders	NCD	Cardiac Arrest	Cardiac Arrest	C0018790
arrests	arrests	arrest	Diseases and Disorders	NCD	Cardiac Arrest	Cardiac Arrest	C0018790
arrhythmias	arrhythmias	arrhythmia	Diseases and Disorders	NCD	Cardiac Arrhythmia	Cardiac Arrhythmia	C0003811
arterial location	arterial location	arterial location	Diagnostic Observations	LF	Location	Location	C0450429	location	RID39038
acromioclavicular arthropathy	arthropathy	arthropathy	Diseases and Disorders	PF	Arthropathy	Arthropathy	C0022408	right, acromioclavicular joint, joint disorder	RID5825, RID1895, RID5393
arthropathy	arthropathy	arthropathy	Diseases and Disorders	PF	Arthropathy	Arthropathy	C0022408	right, acromioclavicular joint, joint disorder	RID5825, RID1895, RID5393
right ac joint arthropathy	arthropathy	arthropathy	Diseases and Disorders	PF	Arthropathy	Arthropathy	C0022408	right, acromioclavicular joint, joint disorder	RID5825, RID1895, RID5393
artifact	artifact	artifact	Procedures and Surgeries	OTH	image artifact	image artifact	C2984794	artifact	RID11296
artificial mitral and aortic valves	artificial mitral and aortic valves	artificial mitral and aortic valve	Medical Devices	OTH	Aortic valve structure	Aortic valve structure	C0003501	aortic valve, mitral valve	RID1394, RID1395
as	as	aortic stenosis	Diseases and Disorders	NCD	Aortic Valve Stenosis	Aortic Valve Stenosis	C0003507	aortic stenosis	RID34590
as/ms	as/ms	aortic stenosis/mitral stenosis	Diseases and Disorders	NCD	Aortic Valve Stenosis	Aortic Valve Stenosis	C0003507	aortic stenosis	RID34590
asbestos related lung disease	asbestos related lung disease	asbestos related lung disease	Diseases and Disorders	CF	Lung diseases	Lung diseases	C0024115
asbestos-related pleural calcifications	asbestos-related pleural calcifications	asbestos-related pleural calcification	Diagnostic Observations	CF	Physiologic calcification	Physiologic calcification	C0006660
ascites	ascites	ascites	Diagnostic Observations	COF	Ascites	Ascites	C0003962
aspergilloma	aspergilloma	aspergilloma	Diseases and Disorders	CF	Aspergilloma	Aspergilloma	C0276651
aspiration	aspiration	aspiration	Diagnostic Observations	CF	Pulmonary aspiration	Pulmonary aspiration	C0700198	focal	RID5702
focal aspiration	aspiration	aspiration	Diagnostic Observations	CF	Pulmonary aspiration	Pulmonary aspiration	C0700198	focal	RID5702
aspiration event	aspiration event	aspiration event	Events and Incidents	Patient Info.	Event	Event	C0441471
aspiration pna	aspiration pna	aspiration pneumonia	Diseases and Disorders	CF	Aspiration Pneumonia	Aspiration Pneumonia	C0032290	pneumonia	RID5350
aspiration pneumonia	aspiration pneumonia	aspiration pneumonia	Diseases and Disorders	CF	Aspiration Pneumonia	Aspiration Pneumonia	C0032290	pneumonia	RID5350
aspiration pneumonitis	aspiration pneumonitis	aspiration pneumonitis	Diseases and Disorders	CF	Aspiration pneumonitis	Aspiration pneumonitis	C1761609	pneumonitis	RID3541
aspiration risk	aspiration risk	aspiration risk	Symptoms and Signs	Patient Info.	Risk	Risk	C0035647
asthma	asthma	asthma	Diseases and Disorders	NCD	Asthma	Asthma	C0004096	asthma	RID5327
severe asthma	asthma	asthma	Diseases and Disorders	NCD	Asthma	Asthma	C0004096	asthma	RID5327
asthma exacerbation	asthma exacerbation	asthma exacerbation	Diseases and Disorders	NCD	Exacerbation of asthma	Exacerbation of asthma	C0349790
asthma flare	asthma flare	asthma flare	Diseases and Disorders	NCD	Asthma	Asthma	C0004096
asthma flareup	asthma flareup	asthma flareup	Diseases and Disorders	NCD	Symptom Flare Up	Symptom Flare Up	C4042866	asthma	RID5327
asymmetry	asymmetry	asymmetry	Diagnostic Observations	LF	asymmetry (qualifier value)	asymmetry (qualifier value)	C0332514	asymmetry	RID34265
asymmetry of the ribcage	asymmetry	asymmetry	Diagnostic Observations	LF	asymmetry (qualifier value)	asymmetry (qualifier value)	C0332514	asymmetry	RID34265
ataxia	ataxia	ataxia	Symptoms and Signs	Patient Info.	Ataxia	Ataxia	C0004134
atelectases	atelectases	atelectasis	Diseases and Disorders	PF	Atelectasis	Atelectasis	C0004144	atelectasis	RID28493
atelectasis	atelectasis	atelectasis	Diseases and Disorders	PF	Atelectasis	Atelectasis	C0004144	atelectasis	RID28493
band-like linear atelectasis	atelectasis	atelectasis	Diseases and Disorders	PF	Atelectasis	Atelectasis	C0004144	atelectasis	RID28493
basal atelectasis	atelectasis	atelectasis	Diseases and Disorders	PF	Atelectasis	Atelectasis	C0004144	atelectasis	RID28493
basilar atelectasis	atelectasis	atelectasis	Diseases and Disorders	PF	Atelectasis	Atelectasis	C0004144	atelectasis	RID28493
bibasal atelectasis	atelectasis	atelectasis	Diseases and Disorders	PF	Atelectasis	Atelectasis	C0004144	atelectasis	RID28493
bibasilar atelectasis	atelectasis	atelectasis	Diseases and Disorders	PF	Atelectasis	Atelectasis	C0004144	atelectasis	RID28493
bibasilar retrocardiac atelectasis	atelectasis	atelectasis	Diseases and Disorders	PF	Atelectasis	Atelectasis	C0004144	atelectasis	RID28493
bilateral atelectasis	atelectasis	atelectasis	Diseases and Disorders	PF	Atelectasis	Atelectasis	C0004144	atelectasis	RID28493
compression atelectasis	atelectasis	atelectasis	Diseases and Disorders	PF	Atelectasis	Atelectasis	C0004144	atelectasis	RID28493
compressive atelectasis	atelectasis	atelectasis	Diseases and Disorders	PF	Atelectasis	Atelectasis	C0004144	atelectasis	RID28493
compressive lower lobe atelectasis	atelectasis	atelectasis	Diseases and Disorders	PF	Atelectasis	Atelectasis	C0004144	atelectasis	RID28493
intracardiac atelectasis	atelectasis	atelectasis	Diseases and Disorders	PF	Atelectasis	Atelectasis	C0004144	atelectasis	RID28493
left basal atelectasis	atelectasis	atelectasis	Diseases and Disorders	PF	Atelectasis	Atelectasis	C0004144	atelectasis	RID28493
left basilar atelectasis	atelectasis	atelectasis	Diseases and Disorders	PF	Atelectasis	Atelectasis	C0004144	atelectasis	RID28493
left basilar linear atelectasis	atelectasis	atelectasis	Diseases and Disorders	PF	Atelectasis	Atelectasis	C0004144	atelectasis	RID28493
left lower lobe atelectasis	atelectasis	atelectasis	Diseases and Disorders	PF	Atelectasis	Atelectasis	C0004144	atelectasis	RID28493
left lower lung atelectasis	atelectasis	atelectasis	Diseases and Disorders	PF	Atelectasis	Atelectasis	C0004144	atelectasis	RID28493
left lung base atelectasis	atelectasis	atelectasis	Diseases and Disorders	PF	Atelectasis	Atelectasis	C0004144	atelectasis	RID28493
left retrocardiac atelectasis	atelectasis	atelectasis	Diseases and Disorders	PF	Atelectasis	Atelectasis	C0004144	atelectasis	RID28493
linear atelectasis	atelectasis	atelectasis	Diseases and Disorders	PF	Atelectasis	Atelectasis	C0004144	atelectasis	RID28493
lingular atelectasis	atelectasis	atelectasis	Diseases and Disorders	PF	Atelectasis	Atelectasis	C0004144	atelectasis	RID28493
lower lobe atelectasis	atelectasis	atelectasis	Diseases and Disorders	PF	Atelectasis	Atelectasis	C0004144	atelectasis	RID28493
lung atelectasis	atelectasis	atelectasis	Diseases and Disorders	PF	Atelectasis	Atelectasis	C0004144	atelectasis	RID28493
major atelectasis	atelectasis	atelectasis	Diseases and Disorders	PF	Atelectasis	Atelectasis	C0004144	atelectasis	RID28493
parenchymal atelectasis	atelectasis	atelectasis	Diseases and Disorders	PF	Atelectasis	Atelectasis	C0004144	atelectasis	RID28493
platelike atelectasis	atelectasis	atelectasis	Diseases and Disorders	PF	Atelectasis	Atelectasis	C0004144	atelectasis	RID28493
retrocardiac atelectasis	atelectasis	atelectasis	Diseases and Disorders	PF	Atelectasis	Atelectasis	C0004144	atelectasis	RID28493
right basal atelectasis	atelectasis	atelectasis	Diseases and Disorders	PF	Atelectasis	Atelectasis	C0004144	atelectasis	RID28493
right basilar atelectasis	atelectasis	atelectasis	Diseases and Disorders	PF	Atelectasis	Atelectasis	C0004144	atelectasis	RID28493
right basilar linear atelectasis	atelectasis	atelectasis	Diseases and Disorders	PF	Atelectasis	Atelectasis	C0004144	atelectasis	RID28493
right lower lobe atelectasis	atelectasis	atelectasis	Diseases and Disorders	PF	Atelectasis	Atelectasis	C0004144	atelectasis	RID28493
right upper lobe atelectasis	atelectasis	atelectasis	Diseases and Disorders	PF	Atelectasis	Atelectasis	C0004144	atelectasis	RID28493
round atelectasis	atelectasis	atelectasis	Diseases and Disorders	PF	Atelectasis	Atelectasis	C0004144	atelectasis	RID28493
rounded atelectasis	atelectasis	atelectasis	Diseases and Disorders	PF	Atelectasis	Atelectasis	C0004144	atelectasis	RID28493
atelectasis/collapse	atelectasis/collapse	atelectasis	Diseases and Disorders	PF	Atelectasis	Atelectasis	C0004144	atelectasis	RID28493
atelectasis/scar	atelectasis/scar	atelectasis/scar	Diagnostic Observations	PF	Atelectasis	Atelectasis	C0004144	atelectasis	RID28493
linear atelectasis/scar	atelectasis/scar	atelectasis/scar	Diagnostic Observations	PF	Atelectasis	Atelectasis	C0004144	atelectasis	RID28493
atelectasis/scarring	atelectasis/scarring	scarring	Diagnostic Observations	PF	cicatrix	cicatrix	C2004491	scar	RID3829
atelectatic band	atelectatic band	atelectatic band	Diagnostic Observations	PF	Atelectasis	Atelectasis	C0004144
atelectatic change	atelectatic change	atelectatic change	Diagnostic Observations	PF	Change -- procedure	Change -- procedure	C4319952	change	RID49896
atelectatic changes	atelectatic changes	atelectatic change	Diagnostic Observations	PF	Change -- procedure	Change -- procedure	C4319952	change	RID49896
atherosclerosis	atherosclerosis	atherosclerosis	Diseases and Disorders	PF	Atherosclerosis	Atherosclerosis	C0004153	atherosclerosis	RID39049
atherosclerotic calcification	atherosclerotic calcification	atherosclerotic calcification	Diagnostic Observations	PF	calcification	calcification	C1533591
atherosclerotic calcification of the aortic arch	atherosclerotic calcification	atherosclerotic calcification	Diagnostic Observations	PF	calcification	calcification	C1533591
atherosclerotic calcifications	atherosclerotic calcifications	atherosclerotic calcification	Diagnostic Observations	PF	calcification	calcification	C1533591
atherosclerotic disease	atherosclerotic disease	atherosclerotic disease	Diseases and Disorders	PF	atherosclerotic occlusive disease	atherosclerotic occlusive disease	C0543822
calcified atherosclerotic disease	atherosclerotic disease	atherosclerotic disease	Diseases and Disorders	PF	atherosclerotic occlusive disease	atherosclerotic occlusive disease	C0543822
atrial fibrillation	atrial fibrillation	atrial fibrillation	Diseases and Disorders	NCD	Atrial Fibrillation	Atrial Fibrillation	C0004238
atrial flutter	atrial flutter	atrial flutter	Diseases and Disorders	NCD	Atrial Flutter	Atrial Flutter	C0004239
atrial lead	atrial lead	atrial lead	Medical Devices	OTH	Atrial Lead	Atrial Lead	C2825198	lead	RID11924
atrial valve prosthesis	atrial valve prosthesis	atrial valve prosthesis	Medical Devices	OTH	Heart Valve Prosthesis	Heart Valve Prosthesis	C0018825	valve, prosthesis	RID5549, RID28823
atrial, biventricular icd	atrial, biventricular icd	atrio-biventricular icd	Medical Devices	OTH	Atrio-Biventricular Pacing	Atrio-Biventricular Pacing	C2936372
atrio-biventricular icd leads	atrio-biventricular icd leads	atrio-biventricular icd lead	Medical Devices	OTH	Atrio-Biventricular Pacing	Atrio-Biventricular Pacing	C2936372	lead	RID11924
atriobiventricular icd leads	atriobiventricular icd leads	atrio-biventricular icd lead	Medical Devices	OTH	Atrio-Biventricular Pacing	Atrio-Biventricular Pacing	C2936372	lead	RID11924
atrioventricular icd leads	atrioventricular icd leads	atrio-biventricular icd lead	Medical Devices	OTH	Atrio-Biventricular Pacing	Atrio-Biventricular Pacing	C2936372	lead	RID11924
atrioventricular implant	atrioventricular implant	atrioventricular implant	Medical Devices	OTH	Atrioventricular valve	Atrioventricular valve	C0225924	implant	RID28790
attenuation	attenuation	attenuation	Diagnostic Observations	LF	Attenuation	Attenuation	C0599946
atypical infection	atypical infection	atypical infection	Diseases and Disorders	CF	Atypical	Atypical	C0205182	atypical, infection	RID27, RID3710
atypical interstitial pneumonia	atypical interstitial pneumonia	atypical interstitial pneumonia	Diseases and Disorders	CF	Pneumonia	Pneumonia	C0032285	pneumonia	RID5350
atypical mycobacterial infection	atypical mycobacterial infection	atypical mycobacterial infection	Diseases and Disorders	CF	Mycobacterium Infections	Mycobacterium Infections	C0026918
atypical mycobacterical infection	atypical mycobacterical infection	atypical mycobacterial infection	Diseases and Disorders	CF	Mycobacterium Infections	Mycobacterium Infections	C0026918
atypical pneumonia	atypical pneumonia	atypical pneumonia	Diseases and Disorders	CF	Pneumonia	Pneumonia	C0032285	pneumonia	RID5350
autoimmune hepatitis	autoimmune hepatitis	autoimmune hepatitis	Diseases and Disorders	NCD	Autoimmune hepatitis	Autoimmune hepatitis	C4721555
av block	av block	Av block	Diseases and Disorders	NCD	Atrioventricular Block	Atrioventricular Block	C0004245
avf	avf	arteriovenous fistula	Medical Devices	OTH	aVF	aVF	C0449215
avr	avr	aortic valve replacement	Procedures and Surgeries	OTH	replacement of aortic valve (procedure)	replacement of aortic valve (procedure)	C0003506	aortic valve, device replacement	RID1394, RID49857
avr mv	avr mv	aortic valve replacement mitral valve	Procedures and Surgeries	OTH	replacement of aortic valve (procedure)	replacement of aortic valve (procedure)	C0003506	aortic valve, device replacement, mitral valve	RID1394, RID49857, RID1395
avr/cabg	avr/cabg	avr/cabg	Procedures and Surgeries	OTH
avr/coronary artery bypass surgery	avr/coronary artery bypass surgery	aortic valve replacement/coronary artery bypass surgery	Procedures and Surgeries	OTH	replacement of aortic valve (procedure), Coronary Artery Bypass Surgery	replacement of aortic valve (procedure), Coronary Artery Bypass Surgery	C0003506, C0010055	aortic valve, device replacement	RID1394, RID49857
axillary abscess	axillary abscess	axillary abscess	Diseases and Disorders	NCD	Abscess	Abscess	C0000833	abscess	RID3711
azygos vein	azygos vein	azygos vein	Anatomical Entities	LF	Structure of azygous vein	Structure of azygous vein	C0004526	azygos vein	RID1169
azygous fissure	azygous fissure	azygos fissure	Anatomical Entities	LF	Fissure	Fissure	C0332469	pulmonary fissure	RID43257
azygous lobe	azygous lobe	azygos lobe	Anatomical Entities	LF	Azygos lobe of lung	Azygos lobe of lung	C0265794	lobe	RID5967
azygous vein	azygous vein	azygos vein	Anatomical Entities	LF	Structure of azygous vein	Structure of azygous vein	C0004526	azygos vein	RID1169
b lines	b lines	kerley b line	Diagnostic Observations	PF	Kerley B lines	x-ray of chest: pulmonary veins kerley's b lines (linear + pleura)	C2073664	Kerley B lines	RID43275
back pain	back pain	back pain	Symptoms and Signs	Patient Info.	Back Pain	Back Pain	C0004604	back, pain	RID30781, RID28803
back surgery	back surgery	back surgery	Procedures and Surgeries	OTH	back surgery	back surgery	C0741419	back	RID30781
bacteremia	bacteremia	bacteremia	Diseases and Disorders	COF	Bacteremia	Bacteremia	C0004610
bacterial pneumonia	bacterial pneumonia	bacterial pneumonia	Diseases and Disorders	CF	Pneumonia	Pneumonia	C0032285	pneumonia	RID5350
bactrim	bactrim	bactrim	Treatment and Medications	OTH	Bactrim	Bactrim	C0591139
bandemia	bandemia	bandemia	Diagnostic Observations	COF	Bandemia	Bandemia	C0741439
barium meal	barium meal	barium meal	Procedures and Surgeries	OTH	Barium meal	Barium meal	C0412103	barium	RID11872
basal parts	basal parts	base	Anatomical Entities	LF	Basal	Basal	C0205112
basal pleural tube	basal pleural tube	basal pleural tube	Medical Devices	OTH	tube	tube	C1561954	tube	RID5555
bb marker	bb marker	BB marker	Medical Devices	OTH	Marker	Marker	C5445211	marker	RID49905
below knee amputation	below knee amputation	below knee amputation	Procedures and Surgeries	OTH	Amputation	Amputation	C0002688
below-knee amputation	below-knee amputation	below-knee amputation	Procedures and Surgeries	OTH	Amputation	Amputation	C0002688
below-the-knee amputation	below-the-knee amputation	below-the-knee amputation	Procedures and Surgeries	OTH	Amputation	Amputation	C0002688
bentall procedure	bentall procedure	bentall procedure	Procedures and Surgeries	OTH	Interventional procedure	Interventional procedure	C0184661
bibasilar rales	bibasilar rales	bibasilar rale	Diagnostic Observations	COF	Basilar Rales	Basilar Rales	C0240859
bilateral chest tubes	bilateral chest tubes	bilateral chest tube	Medical Devices	OTH	Chest Tubes	Chest Tubes	C0008034	thoracostomy tube	RID5573
bilateral crackles	bilateral crackles	bilateral crackle	Diagnostic Observations	COF	Bilateral	Bilateral	C0238767
bilateral shoulder arthroplasties	bilateral shoulder arthroplasties	bilateral shoulder arthroplasty	Procedures and Surgeries	OTH	Shoulder - bilateral	Arthroplasty, Replacement, Shoulder	C0186657
biliary stent	biliary stent	biliary stent	Medical Devices	OTH	Biliary Stent Devices	Biliary Stent Devices	C0183512	biliary system, stent	RID28753, RID5598
billroth ii	billroth ii	billroth ii	Procedures and Surgeries	OTH	Billroth II Procedure	Billroth II Procedure	C0192444
bioprosthetic aortic valve replacement	bioprosthetic aortic valve replacement	bioprosthetic aortic valve replacement	Procedures and Surgeries	OTH	replacement of aortic valve (procedure)	replacement of aortic valve (procedure)	C0003506	aortic valve, device replacement	RID1394, RID49857
biopsies	biopsies	biopsy	Procedures and Surgeries	OTH	Biopsy	Biopsy	C0005558	biopsy	RID38611
biopsy	biopsy	biopsy	Procedures and Surgeries	OTH	Biopsy	Biopsy	C0005558	biopsy	RID38611
bipap	bipap	Bilevel positive airway pressure	Medical Devices	OTH	Biphasic Continuous Positive Airway Pressure	Biphasic Continuous Positive Airway Pressure	C1956423
bipolar disease	bipolar disease	bipolar disease	Diseases and Disorders	NCD	Disease	Disease	C0012634
biv icd	biv icd	biventricular icd	Medical Devices	OTH	BiV ICD	BiV ICD	C1719275
biventricular decompensation	biventricular decompensation	biventricular decompensation	Diseases and Disorders	COF	Decompensation	Decompensation	C0231187
biventricular failure	biventricular failure	biventricular failure	Diseases and Disorders	CF	Biventricular congestive heart failure	Biventricular congestive heart failure	C0685095
biventricular heart failure	biventricular heart failure	heart failure	Diseases and Disorders	CF	Heart failure	Heart failure	C0018801	heart failure	RID34795
biventricular icd placement	biventricular icd	biventricular icd	Medical Devices	OTH	Placement	Placement	C1524072
biventricular icd implant	biventricular icd implant	biventricular icd implant	Medical Devices	OTH	Drug Implant	Type II Mucolipidosis	C0020725	implant	RID28790
biventricular leads	biventricular leads	biventricular lead	Medical Devices	OTH	Atrio-Biventricular Pacing	Atrio-Biventricular Pacing	C2936372	lead	RID11924
biventricular pacer defibrillator	biventricular pacer defibrillator	biventricular pacer defibrillator	Medical Devices	OTH	Defibrillators	Defibrillators	C0180307
biventricular pacer/icd	biventricular pacer/icd	biventricular pacer/icd	Medical Devices	OTH	pacemakers	pacemakers	C0810633	pacemaker	RID5436
biventricular pacer/icd leads	biventricular pacer/icd leads	biventricular pacer/icd lead	Medical Devices	OTH	pacemakers	pacemakers	C0810633	pacemaker	RID5436
biventricular pacing lead	biventricular pacing lead	biventricular pacing lead	Medical Devices	OTH	pacemakers	pacemakers	C0810633	pacemaker	RID5436
biventricular pacing leads	biventricular pacing leads	biventricular pacing lead	Medical Devices	OTH	pacemakers	pacemakers	C0810633	pacemaker	RID5436
bivicd implant	bivicd implant	biventricular icd implant	Medical Devices	OTH	Drug Implant	Drug Implant	C1704229	implant	RID28790
bka	bka	below-knee amputation	Procedures and Surgeries	OTH
bleed	bleed	bleed	Symptoms and Signs	Patient Info.	Hemorrhage	Hemorrhage	C0019080	blood	RID1543
bleeding	bleeding	bleeding	Symptoms and Signs	Patient Info.
blood aspiration	blood aspiration	blood aspiration	Procedures and Surgeries	Patient Info.	Pulmonary aspiration of blood	Pulmonary aspiration of blood	C0232077	blood	RID1543
blood cultures	blood cultures	blood culture	Diagnostic Observations	COF	Blood culture	Blood culture	C0200949	blood	RID1543
blood loss	blood loss	blood loss	Symptoms and Signs	Patient Info.	Blood Loss	Blood Loss	C3163616	blood	RID1543
blood pressure	blood pressure	blood pressure	Diagnostic Observations	COF	Blood Pressure	Blood Pressure	C0005823	blood, pressure	RID1543, RID13034
blood sugar	blood sugar	blood sugar	Diagnostic Observations	COF	blood glucose	blood glucose	C0005802
blood sugars	blood sugars	blood sugar	Diagnostic Observations	COF	blood glucose	blood glucose	C0005802
blood tinged sputum	blood tinged sputum	blood tinged sputum	Symptoms and Signs	Patient Info.	Sputum	Sputum	C0038056
blood transfusion	blood transfusion	blood transfusion	Procedures and Surgeries	OTH	Blood Transfusion	Blood Transfusion	C0005841	blood	RID1543
blood-tinged sputum	blood-tinged sputum	blood-tinged sputum	Symptoms and Signs	Patient Info.	Sputum	Sputum	C0038056
bloody sputum	bloody sputum	bloody sputum	Symptoms and Signs	Patient Info.	Sputum	Sputum	C0038056
bloody stools	bloody stools	bloody stool	Symptoms and Signs	Patient Info.	EPIC-26 - Bloody Stools	EPIC-26 - Bloody Stools	C4287870
blunting	blunting	blunting	Diagnostic Observations	LF	blunted	blunted	C1997138	blunt injury	RID4635
blunting of costophrenic angles	blunting	blunting	Diagnostic Observations	LF	blunted	blunted	C1997138	blunt injury	RID4635
blunting of costovertebral angles	blunting	blunting	Diagnostic Observations	LF	blunted	blunted	C1997138	blunt injury	RID4635
blunting of cp angles	blunting	blunting	Diagnostic Observations	LF	blunted	blunted	C1997138	blunt injury	RID4635
blunting of lateral pleural sinus	blunting	blunting	Diagnostic Observations	LF	blunted	blunted	C1997138	blunt injury	RID4635
blunting of left costophrenic angle	blunting	blunting	Diagnostic Observations	LF	blunted	blunted	C1997138	blunt injury	RID4635
blunting of the costophrenic angle	blunting	blunting	Diagnostic Observations	LF	blunted	blunted	C1997138	blunt injury	RID4635
blunting of the costophrenic angles	blunting	blunting	Diagnostic Observations	LF	blunted	blunted	C1997138	blunt injury	RID4635
blunting of the costophrenic sinuses	blunting	blunting	Diagnostic Observations	LF	blunted	blunted	C1997138	blunt injury	RID4635
blunting of the left costophrenic angle	blunting	blunting	Diagnostic Observations	LF	blunted	blunted	C1997138	blunt injury	RID4635
blunting of the left costophrenic sinus	blunting	blunting	Diagnostic Observations	LF	blunted	blunted	C1997138	blunt injury	RID4635
blunting of the left lateral and posterior pleural sinus	blunting	blunting	Diagnostic Observations	LF	blunted	blunted	C1997138	blunt injury	RID4635
blunting of the left lateral pleural sinus	blunting	blunting	Diagnostic Observations	LF	blunted	blunted	C1997138	blunt injury	RID4635
blunting of the left posterior costophrenic angle	blunting	blunting	Diagnostic Observations	LF	blunted	blunted	C1997138	blunt injury	RID4635
blunting of the left posterior costophrenic sulcus	blunting	blunting	Diagnostic Observations	LF	blunted	blunted	C1997138	blunt injury	RID4635
blunting of the pleural sinus	blunting	blunting	Diagnostic Observations	LF	blunted	blunted	C1997138	blunt injury	RID4635
blunting of the pleural sinuses	blunting	blunting	Diagnostic Observations	LF	blunted	blunted	C1997138	blunt injury	RID4635
blunting of the posterior costophrenic angle	blunting	blunting	Diagnostic Observations	LF	blunted	blunted	C1997138	blunt injury	RID4635
blunting of the posterior costophrenic angles	blunting	blunting	Diagnostic Observations	LF	blunted	blunted	C1997138	blunt injury	RID4635
blunting of the right costophrenic angle	blunting	blunting	Diagnostic Observations	LF	blunted	blunted	C1997138	blunt injury	RID4635
blunting of the right costophrenic sinus	blunting	blunting	Diagnostic Observations	LF	blunted	blunted	C1997138	blunt injury	RID4635
blunting of the right costophrenic sulcus	blunting	blunting	Diagnostic Observations	LF	blunted	blunted	C1997138	blunt injury	RID4635
blunting of the right cp angle	blunting	blunting	Diagnostic Observations	LF	blunted	blunted	C1997138	blunt injury	RID4635
blunting of the right posterior pleural sulcus	blunting	blunting	Diagnostic Observations	LF	blunted	blunted	C1997138	blunt injury	RID4635
costophrenic angle blunting	blunting	blunting	Diagnostic Observations	LF	blunted	blunted	C1997138	blunt injury	RID4635
cp angle blunting	blunting	blunting	Diagnostic Observations	LF	blunted	blunted	C1997138	blunt injury	RID4635
left costophrenic angle blunting	blunting	blunting	Diagnostic Observations	LF	blunted	blunted	C1997138	blunt injury	RID4635
pleural blunting	blunting	blunting	Diagnostic Observations	LF	blunted	blunted	C1997138	blunt injury	RID4635
blurring	blurring	blurring	Diagnostic Observations	LF	visual blurring	visual blurring	C1847840
vascular blurring	blurring	blurring	Diagnostic Observations	LF	visual blurring	visual blurring	C1847840
bm frequency	bm frequency	bm frequency	Symptoms and Signs	Patient Info.	With frequency	With frequency	C0376249
bochdalek hernia	bochdalek hernia	bochdalek hernia	Diseases and Disorders	CF	Congenital hernia of foramen of Bochdalek	Congenital hernia of foramen of Bochdalek	C0265700	hernia	RID4895
small bochdalek hernia	bochdalek hernia	bochdalek hernia	Diseases and Disorders	CF	Congenital hernia of foramen of Bochdalek	Congenital hernia of foramen of Bochdalek	C0265700	hernia	RID4895
body aches	body aches	body ache	Symptoms and Signs	Patient Info.	BODY ACHE	BODY ACHE	C0741585
body pain	body pain	body pain	Symptoms and Signs	Patient Info.	BODY ACHE	BODY ACHE	C0741585
bone island	bone island	bone island	Diagnostic Observations	CF	Bone island	Bone island	C0265512	bone region	RID6098
bone structure	bone structure	bone structure	Anatomical Entities	LF	Skeletal bone	Skeletal bone	C0262950	bone region	RID6098
bones	bones	bone	Anatomical Entities	LF	Skeletal bone	Skeletal bone	C0262950	bone region	RID6098
sclerotic bones	bones	bone	Anatomical Entities	LF	Skeletal bone	Skeletal bone	C0262950	bone region	RID6098
bony coalition	bony coalition	bony coalition	Diseases and Disorders	PF
bony structure	bony structure	bone structure	Anatomical Entities	LF	Skeletal bone	Skeletal bone	C0262950	bone region	RID6098
bony structures	bony structures	bone structure	Anatomical Entities	LF	Skeletal bone	Skeletal bone	C0262950	bone region	RID6098
bony thorax	bony thorax	bony thorax	Anatomical Entities	LF
border	border	border	Diagnostic Observations	LF	border (boundary)	border (boundary)	C2828371	border	RID5951
heart border	border	border	Diagnostic Observations	LF	border (boundary)	border (boundary)	C2828371	border	RID5951
left cardiac border	border	border	Diagnostic Observations	LF	border (boundary)	border (boundary)	C2828371	border	RID5951
left heart border	border	border	Diagnostic Observations	LF	border (boundary)	border (boundary)	C2828371	border	RID5951
mediastinal border	border	border	Diagnostic Observations	LF	border (boundary)	border (boundary)	C2828371	border	RID5951
right heart border	border	border	Diagnostic Observations	LF	border (boundary)	border (boundary)	C2828371	border	RID5951
borders	borders	border	Diagnostic Observations	LF	border (boundary)	border (boundary)	C2828371	border	RID5951
cardio mediastinal borders	borders	border	Diagnostic Observations	LF	border (boundary)	border (boundary)	C2828371	border	RID5951
cardiomediastinal borders	borders	border	Diagnostic Observations	LF	border (boundary)	border (boundary)	C2828371	border	RID5951
heart borders	borders	border	Diagnostic Observations	LF	border (boundary)	border (boundary)	C2828371	border	RID5951
hilar borders	borders	border	Diagnostic Observations	LF	border (boundary)	border (boundary)	C2828371	border	RID5951
left-sided cardiomediastinal borders	borders	border	Diagnostic Observations	LF	border (boundary)	border (boundary)	C2828371	border	RID5951
mediastinal borders	borders	border	Diagnostic Observations	LF	border (boundary)	border (boundary)	C2828371	border	RID5951
both lungs	both lungs	both lung	Anatomical Entities	LF	Lung	Lung	C0024109
bowel	bowel	bowel	Anatomical Entities	LF	Distended	Distended	C4082695	distended	RID5787
distended bowel	bowel	bowel	Anatomical Entities	LF
bp dropping	bp dropping	blood pressure drop	Diagnostic Observations	COF	Blood Pressure	Blood Pressure	C0005823	blood, pressure	RID1543, RID13034
brachiocephalic stent	brachiocephalic stent	brachiocephalic stent	Medical Devices	OTH	Stent, device	Stent, device	C0038257	brachiocephalic vein, stent	RID1011, RID5598
brachiocephalic stents	brachiocephalic stents	brachiocephalic stent	Medical Devices	OTH	Stent, device	Stent, device	C0038257	brachiocephalic vein, stent	RID1011, RID5598
brachiocephalic vein stent	brachiocephalic vein stent	brachiocephalic vein stent	Medical Devices	OTH	Stent, device	Stent, device	C0038257	brachiocephalic vein, stent	RID1011, RID5598
brachiocephalic venous stent	brachiocephalic venous stent	brachiocephalic venous stent	Medical Devices	OTH	Venous stent	Venous stent	C2919452	stent	RID5598
brachiocephalic/svc stent	brachiocephalic/svc stent	brachiocephalic/svc stent	Medical Devices	OTH	Structure of brachiocephalic vein	Structure of brachiocephalic vein	C0006095	stent	RID5598
bradycardia	bradycardia	bradycardia	Diagnostic Observations	COF	Bradycardia	Bradycardia	C0428977
brain metastases	brain metastases	brain metastasis	Diseases and Disorders	NCD	metastasis	metastasis	C4255448	metastasis	RID5231
brain mets	brain mets	brain metastasis	Diseases and Disorders	NCD	Brain	Brain	C0006104
bravo ph capsule	bravo ph capsule	bravo pH capsule	Medical Devices	OTH	capsule	Bravo (Serotype)	C0443160	capsule	RID34943
brbpr	brbpr	brbpr	Symptoms and Signs	Patient Info.	Hematochezia	Hematochezia	C0018932
breast cancer	breast cancer	breast cancer	Diseases and Disorders	NCD	Breast Carcinoma	Breast Carcinoma	C0678222
breath sounds	breath sounds	breath sound	Diagnostic Observations	COF	Abnormal breath sounds	Abnormal breath sounds	C0231856
breath-hold	breath-hold	breath-hold	Procedures and Surgeries	Patient Info.	Breath-holding spell	Breath-holding spell	C0476287
bridging	bridging	bridging	Diagnostic Observations	LF	Bridging fibrosis	Bridging fibrosis	C0334160
anterior bridging osteophytes	bridging osteophytes	bridging osteophyte	Diagnostic Observations	PF	anterior, osteophyte	Osteophyte	C1956089	anterior, osteophyte	RID5818, RID5076
bridging osteophytes	bridging osteophytes	bridging osteophytes	Diagnostic Observations	PF
broken sternal wires	broken sternal wires	broken sternal wire	Medical Devices	OTH	wire device	wire device	C4522306	wire	RID5453
broken wires	broken wires	broken wire	Medical Devices	OTH	wire device	wire device	C4522306	wire	RID5453
bronch	bronch	bronchoscopy	Procedures and Surgeries	OTH	Bronchoscopy	Bronchoscopy	C0006290
bronchial aspiration biopsies	bronchial aspiration biopsies	bronchial aspiration biopsy	Procedures and Surgeries	OTH	Biopsy	Biopsy	C0005558
bronchial infection	bronchial infection	bronchial infection	Diseases and Disorders	CF	Infection	Infection	C3714514	infection	RID3710
bronchial obstruction	bronchial obstruction	bronchial obstruction	Diseases and Disorders	PF	Bronchial Obstruction	Bronchial Obstruction	C0221725	obstruction	RID4962
bronchial wall	bronchial wall	bronchial wall	Anatomical Entities	LF
bronchial walls	bronchial walls	bronchial wall	Anatomical Entities	LF	Bronchial	Bronchial	C0205039	wall	RID5987
bronchiectasis	bronchiectasis	bronchiectasis	Diseases and Disorders	CF	Bronchiectasis	Bronchiectasis	C0006267	bronchiectasis	RID28496
bronchiectatic changes	bronchiectatic changes	bronchiectatic change	Diagnostic Observations	CF	Change -- procedure	Change -- procedure	C4319952	change	RID49896
bronchiolitis obliterans	bronchiolitis obliterans	bronchiolitis obliterans	Diseases and Disorders	CF	Bronchiolitis Obliterans	Bronchiolitis Obliterans	C0006272	bronchiolitis	RID28499
bronchitis	bronchitis	bronchitis	Diseases and Disorders	CF	Bronchitis	Bronchitis	C0006277	bronchitis	RID34637
bronchoscopic biopsy	bronchoscopic biopsy	bronchoscopic biopsy	Procedures and Surgeries	OTH	Bronchoscopic biopsy curette, rigid	Bronchoscopic biopsy curette, rigid	C0492288
bronchoscopic fiducial marker	bronchoscopic fiducial marker	bronchoscopic fiducial marker	Medical Devices	OTH	Placement	Placement	C1524072
bronchoscopic fiducial marker placement	bronchoscopic fiducial marker	bronchoscopic fiducial marker	Medical Devices	OTH
bronchoscopies	bronchoscopies	bronchoscopy	Procedures and Surgeries	OTH	Bronchoscopy	Bronchoscopy	C0006290
bronchoscopy	bronchoscopy	bronchoscopy	Procedures and Surgeries	OTH	Bronchoscopy	Bronchoscopy	C0006290	bronchoscopy	RID50156
bronchovascular markings	bronchovascular markings	bronchovascular marking	Diagnostic Observations	LF	bronchovascular	Vascular ring	C0221214	bronchovascular	RID46051
bronchovascular structures	bronchovascular structures	bronchovascular structure	Anatomical Entities	LF	Structure of lymphatic vessel and/or small blood vessel	Structure of lymphatic vessel and/or small blood vessel	C5548423	bronchovascular, structure	RID46051, RID35808
bulge	bulge	bulge	Diagnostic Observations	LF	Eye Bulge	Eye Bulge	C5445186
bulging	bulging	bulging	Diagnostic Observations	LF	Left Ventricular Outflow Tract	Left Ventricular Outflow Tract	C4284103
pulmonary outflow tract bulging	bulging	bulging	Diagnostic Observations	LF
bulla	bulla	bulla	Diagnostic Observations	PF	Bulla	Bulla	C0005758	bulla	RID28502
bullae	bullae	bulla	Diagnostic Observations	PF	Bulla	Bulla	C0005758	bulla	RID28502
apical bullous changes	bullous changes	bullous change	Diseases and Disorders	PF	Change -- procedure	Change -- procedure	C4319952	change	RID49896
bullous changes	bullous changes	bullous change	Diseases and Disorders	PF	Change -- procedure	Change -- procedure	C4319952	change	RID49896
bullous disease	bullous disease	bullous disease	Diseases and Disorders	PF	Bullous disease	Bullous disease	C3149269
bullous emphysema	bullous emphysema	bullous emphysema	Diseases and Disorders	PF	other emphysema	other emphysema	C0029607	bullous emphysema	RID28503
bullous emphysematous changes	bullous emphysematous changes	bullous emphysematous change	Diseases and Disorders	PF	Change -- procedure	Change -- procedure	C4319952	change	RID49896
bun/cr	bun/cr	bun/cr	Diagnostic Observations	COF
burkitt lymphoma	burkitt lymphoma	burkitt lymphoma	Diseases and Disorders	NCD	Burkitt Lymphoma	Burkitt Lymphoma	C0006413
burkitts lymphoma	burkitts lymphoma	burkitts lymphoma	Diseases and Disorders	NCD	Burkitt Lymphoma	Burkitt Lymphoma	C0006413
burning sensation	burning sensation	burning sensation	Symptoms and Signs	Patient Info.	Burning sensation	Burning sensation	C0085624
bypass graft placements	bypass graft	bypass graft	Medical Devices	OTH	Bypass graft	Bypass graft	C0185098
bypass surgery	bypass surgery	bypass surgery	Procedures and Surgeries	OTH	Bypass Surgery	Bypass Surgery	C1536078
c cath	c cath	c cath	Medical Devices	OTH
o s/p c cath	c cath	cardiac catheterization	Procedures and Surgeries	OTH	Cardiac Catheterization Procedures	Cardiac Catheterization Procedures	C0018795
c diff	c diff	clostridium difficile	Diseases and Disorders	COF	TIFF
c diff colitis	c diff colitis	clostridium difficile colitis	Diseases and Disorders	NCD	Colitis
c-spine fixation hardware	c-spine fixation hardware	c-spine fixation hardware	Medical Devices	OTH	Hardware Application	Hardware Application	C1711345
cabg	cabg	cabg	Procedures and Surgeries	OTH	coronary artery bypass surgery	coronary artery bypass surgery	C0010055
cabg changes	cabg changes	cabg change	Procedures and Surgeries	OTH	Change -- procedure	Change -- procedure	C4319952	change	RID49896
cabg clips	cabg clips	cabg clips	Medical Devices	OTH	Surgical Clips	Surgical Clips	C0038917	surgical clip	RID5607
cabg material	cabg material	cabg material	Medical Devices	OTH	coronary artery bypass surgery	coronary artery bypass surgery	C0010055
cabg procedure	cabg procedure	cabg procedure	Procedures and Surgeries	OTH	coronary artery bypass surgery	coronary artery bypass surgery	C0010055
cad	cad	coronary artery disease	Diseases and Disorders	NCD	Coronary Artery Disease	Coronary Artery Disease	C1956346
cad patch	cad patch	cad patch	Medical Devices	OTH	Surgical patch	Surgical patch	C1305400
calcific tendinitis	calcific tendinitis	calcific tendinitis	Diseases and Disorders	CF	Calcific tendinitis	Calcific tendinitis	C0521515
aortic arch calcification	calcification	calcification	Diseases and Disorders	PF	Calcification	Calcification	C1533591	calcification	RID5196
aortic knob calcification	calcification	calcification	Diseases and Disorders	PF	Calcification	Calcification	C1533591	calcification	RID5196
calcification	calcification	calcification	Diseases and Disorders	PF	Calcification	Calcification	C1533591	calcification	RID5196
calcification of the abdominal aorta	calcification	calcification	Diseases and Disorders	PF	Calcification	Calcification	C1533591	calcification	RID5196
calcification of the aorta	calcification	calcification	Diseases and Disorders	PF	Calcification	Calcification	C1533591	calcification	RID5196
calcification of the aortic arch	calcification	calcification	Diseases and Disorders	PF	Calcification	Calcification	C1533591	calcification	RID5196
calcification of the aortic knob	calcification	calcification	Diseases and Disorders	PF	Calcification	Calcification	C1533591	calcification	RID5196
calcification of the thoracic aorta	calcification	calcification	Diseases and Disorders	PF	Calcification	Calcification	C1533591	calcification	RID5196
coronary artery calcification	calcification	calcification	Diseases and Disorders	PF	Calcification	Calcification	C1533591	calcification	RID5196
costochondral calcification	calcification	calcification	Diseases and Disorders	PF	Calcification	Calcification	C1533591	calcification	RID5196
left main bronchus calcification	calcification	calcification	Diseases and Disorders	PF	Calcification	Calcification	C1533591	calcification	RID5196
lenticular calcification	calcification	calcification	Diseases and Disorders	PF	Calcification	Calcification	C1533591	calcification	RID5196
mediastinal lymph node calcification	calcification	calcification	Diseases and Disorders	PF	Calcification	Calcification	C1533591	calcification	RID5196
mitral annulus calcification	calcification	calcification	Diseases and Disorders	PF	Calcification	Calcification	C1533591	calcification	RID5196
mitral anulus calcification	calcification	calcification	Diseases and Disorders	PF	Calcification	Calcification	C1533591	calcification	RID5196
pleural calcification	calcification	calcification	Diseases and Disorders	PF	Calcification	Calcification	C1533591	calcification	RID5196
tracheobronchial tree calcification	calcification	calcification	Diseases and Disorders	PF	Calcification	Calcification	C1533591	calcification	RID5196
vascular calcification	calcification	calcification	Diseases and Disorders	PF	Calcification	Calcification	C1533591	calcification	RID5196
aortic annular calcifications	calcifications	calcification	Diseases and Disorders	PF	Calcification	Calcification	C1533591	calcification	RID5196
aortic arch calcifications	calcifications	calcification	Diseases and Disorders	PF	Calcification	Calcification	C1533591	calcification	RID5196
aortic calcifications	calcifications	calcification	Diseases and Disorders	PF	Calcification	Calcification	C1533591	calcification	RID5196
aortic knob calcifications	calcifications	calcification	Diseases and Disorders	PF	Calcification	Calcification	C1533591	calcification	RID5196
aortic valve calcifications	calcifications	calcification	Diseases and Disorders	PF	Calcification	Calcification	C1533591	calcification	RID5196
calcifications	calcifications	calcification	Diseases and Disorders	PF	Calcification	Calcification	C1533591	calcification	RID5196
carotid calcifications	calcifications	calcification	Diseases and Disorders	PF	Calcification	Calcification	C1533591	calcification	RID5196
cervical soft tissue calcifications	calcifications	calcification	Diseases and Disorders	PF	Calcification	Calcification	C1533591	calcification	RID5196
chondroid calcifications	calcifications	calcification	Diseases and Disorders	PF	Calcification	Calcification	C1533591	calcification	RID5196
coronary artery calcifications	calcifications	calcification	Diseases and Disorders	PF	Calcification	Calcification	C1533591	calcification	RID5196
coronary calcifications	calcifications	calcification	Diseases and Disorders	PF	Calcification	Calcification	C1533591	calcification	RID5196
linear calcifications	calcifications	calcification	Diseases and Disorders	PF	Calcification	Calcification	C1533591	calcification	RID5196
mitral annular calcifications	calcifications	calcification	Diseases and Disorders	PF	Calcification	Calcification	C1533591	calcification	RID5196
mitral annulus calcifications	calcifications	calcification	Diseases and Disorders	PF	Calcification	Calcification	C1533591	calcification	RID5196
pleural calcifications	calcifications	calcification	Diseases and Disorders	PF	Calcification	Calcification	C1533591	calcification	RID5196
punctate calcifications	calcifications	calcification	Diseases and Disorders	PF	Calcification	Calcification	C1533591	calcification	RID5196
splenic calcifications	calcifications	calcification	Diseases and Disorders	PF	Calcification	Calcification	C1533591	calcification	RID5196
valvular calcifications	calcifications	calcification	Diseases and Disorders	PF	Calcification	Calcification	C1533591	calcification	RID5196
vascular calcifications	calcifications	calcification	Diseases and Disorders	PF	Calcification	Calcification	C1533591	calcification	RID5196
calciphylaxis	calciphylaxis	calciphylaxis	Diseases and Disorders	NCD	Calciphylaxis	Calciphylaxis	C0006666
caliber	caliber	caliber	Diagnostic Observations	LF	caliber	diameter (qualifier value)	C1301886	caliber	RID13440
caliber of the mediastinum	caliber	caliber	Diagnostic Observations	LF	caliber	diameter (qualifier value)	C1301886	caliber	RID13440
caliber of the right paratracheal stripe	caliber	caliber	Diagnostic Observations	LF	caliber	diameter (qualifier value)	C1301886	caliber	RID13440
mediastinal caliber	caliber	caliber	Diagnostic Observations	LF	caliber	diameter (qualifier value)	C1301886	caliber	RID13440
mediastinal vascular caliber	caliber	caliber	Diagnostic Observations	LF	caliber	diameter (qualifier value)	C1301886	caliber	RID13440
vascular caliber	caliber	caliber	Diagnostic Observations	LF	caliber	diameter (qualifier value)	C1301886	caliber	RID13440
caliber of esophageal stent	caliber of esophageal stent	caliber of esophageal stent	Medical Devices	OTH	caliber	diameter (qualifier value)	C1301886	caliber	RID13440
callus	callus	callus	Diagnostic Observations	PF	Callus formation	Callus formation	C3811681
callus formation	callus	callus	Diagnostic Observations	PF	callus formation	callus formation	C3811681
cancer	cancer	cancer	Diseases and Disorders	NCD	malignant neoplasms	malignant neoplasms	C0006826
cap	cap	commnunity acquired pneumonia	Diseases and Disorders	CF	Pneumonia	Pneumonia	C0032285	pneumonia	RID5350
carcinomatosis	carcinomatosis	carcinomatosis	Diseases and Disorders	NCD	Carcinomatosis	Carcinomatosis	C0205699	carcinomatosis	RID4264
cardiac	cardiac	cardiac	Anatomical Entities	LF	Cardiac attachment	Cardiac attachment	C1314974
cardiac arrest	cardiac arrest	cardiac arrest	Diseases and Disorders	Patient Info.	Cardiac Arrest	Cardiac Arrest	C0018790
cardiac catheterization	cardiac catheterization	cardiac catheterization	Procedures and Surgeries	OTH	Cardiac Catheterization Procedures	Cardiac Catheterization Procedures	C0018795
cardiac conduction device	cardiac conduction device	cardiac conduction device	Medical Devices	OTH	medical devices	medical devices	C0025080
cardiac decompensation	cardiac decompensation	cardiac decompensation	Diseases and Disorders	CF	Decompensation	Decompensation	C0231187
cardiac device	cardiac device	cardiac device	Medical Devices	OTH	medical devices	medical devices	C0025080
cardiac failure	cardiac failure	cardiac failure	Diseases and Disorders	CF	Heart failure	Heart failure	C0018801	heart failure	RID34795
cardiac pacemaker	cardiac pacemaker	cardiac pacemaker	Medical Devices	OTH	pacemakers	pacemakers	C0810633	pacemaker	RID5436
cardiac pacer	cardiac pacer	cardiac pacer	Medical Devices	OTH	pacemakers	pacemakers	C0810633	pacemaker	RID5436
cardiac pacer with wires	cardiac pacer with wires	cardiac pacer with wire	Medical Devices	OTH	wire device	wire device	C4522306	wire	RID5453
cardiac pacing device	cardiac pacing device	cardiac pace device	Medical Devices	OTH	pacemakers	pacemakers	C0810633	pacemaker	RID5436
cardiac structures	cardiac structures	heart	Anatomical Entities	LF	Heart	Heart	C0018787	heart	RID1385
cardiac surgery	cardiac surgery	cardiac surgery	Procedures and Surgeries	OTH	Cardiac Surgery procedures	Cardiac Surgery procedures	C0018821
cardiac tamponade	cardiac tamponade	cardiac tamponade	Diseases and Disorders	CF	Cardiac Tamponade	Cardiac Tamponade	C0007177	cardiac tamponade	RID3283
cardiac valve replacement	cardiac valve replacement	cardiac valve replacement	Procedures and Surgeries	OTH	Valve Replacement	Valve Replacement	C5239551	valve, device replacement	RID5549, RID49857
cardimegally	cardimegally	cardimegally	Diagnostic Observations	PF	Cardiomegaly	Cardiomegaly	C0018800
cardiogenic pulmonary edema	cardiogenic pulmonary edema	cardiogenic pulmonary edema	Diseases and Disorders	CF	cardiogenic pulmonary edema	x-ray of chest: lungs pulmonary edema cardiogenic	C2073568	cardiogenic pulmonary edema	RID4867
cardiogenic shock	cardiogenic shock	cardiogenic shock	Diseases and Disorders	NCD	History of Cardiogenic Shock	History of Cardiogenic Shock	C1881054
cardiomediastinal	cardiomediastinal	cardiomediastinum	Anatomical Entities	LF	Mediastinum	Mediastinum	C0025066	mediastinum	RID1384
cardiomediastinal shift	cardiomediastinal shift	cardiomediastinal shift	Diagnostic Observations	LF	Mediastinal shift	Mediastinal shift	C0264576
cardiomediastinal silhouettes	cardiomediastinal silhouettes	cardiomediastinal silhouettes	Diagnostic Observations	LF	cardiac shadow viewed radiologically	cardiac shadow viewed radiologically	C0507134	cardiac shadow viewed radiologically	C0507134
cardiomediastinal structures	cardiomediastinal structures	cardiomediastinal structure	Anatomical Entities	LF	Mediastinum	Mediastinum	C0025066	mediastinum	RID1384
cardiomediastinum	cardiomediastinum	cardiomediastinum	Anatomical Entities	LF	Mediastinum	Mediastinum	C0025066	mediastinum	RID1384
cardiomegaly	cardiomegaly	cardiomegaly	Diseases and Disorders	PF	Cardiomegaly	Cardiomegaly	C0018800
chronic cardiomegaly	cardiomegaly	cardiomegaly	Diseases and Disorders	PF	Cardiomegaly	Cardiomegaly	C0018800
cardiomyopathy	cardiomyopathy	cardiomyopathy	Diseases and Disorders	NCD	cardiomyopathies	cardiomyopathies	C0878544	cardiomyopathy	RID3243
acute cardiopulm disease	cardiopulm disease	cardiopulmonary disease	Diseases and Disorders	CF	cardiovascular disease+pulmonary disease	cardiovascular disease+pulmonary disease	C4072686
cardiopulm disease	cardiopulm disease	cardiopulm disease	Diagnostic Observations	PF	cardiovascular disease+pulmonary disease	cardiovascular disease+pulmonary disease	C4072686
acute cardiopulmonary disease	cardiopulmonary disease	cardiopulmonary disease	Diseases and Disorders	CF	cardiovascular disease+pulmonary disease	cardiovascular disease+pulmonary disease	C4072686
cardiopulmonary disease	cardiopulmonary disease	cardiopulmonary disease	Diseases and Disorders	CF	cardiovascular disease+pulmonary disease	cardiovascular disease+pulmonary disease	C4072686
acute cardiopulmonary issues	cardiopulmonary issues	cardiopulmonary issues	Diseases and Disorders	CF	cardiovascular disease+pulmonary disease	cardiovascular disease+pulmonary disease	C4072686
acute cardiopulmonary issues	cardiopulmonary issues	cardiopulmonary issues	Diseases and Disorders	CF	cardiovascular disease+pulmonary disease	cardiovascular disease+pulmonary disease	C4072686
cardiopulmonary issues	cardiopulmonary issues	cardiopulmonary issues	Diseases and Disorders	CF	cardiovascular disease+pulmonary disease	cardiovascular disease+pulmonary disease	C4072686
cardiopulmonary issues	cardiopulmonary issues	cardiopulmonary issues	Diseases and Disorders	CF	cardiovascular disease+pulmonary disease	cardiovascular disease+pulmonary disease	C4072686
cardiopulmonary support devices	cardiopulmonary support devices	cardiopulmonary support devices	Medical Devices	OTH	Cardiopulmonary	Cardiopulmonary	C0553534
cardiorespiratory insufficiency	cardiorespiratory insufficiency	cardiorespiratory insufficiency	Diseases and Disorders	NCD	Cardiopulmonary insufficiency	Cardiopulmonary insufficiency	C0920033
carina	carina	carina	Anatomical Entities	LF	Structure of carina	Structure of carina	C0225594	carina	RID1248
carolis disease	carolis disease	carolis disease	Diagnostic Observations	PF	Disease	Disease	C0012634
cart focal	cart focal	cart focal	Diagnostic Observations	LF	Focal	Focal	C0205234	focal	RID5702
advancement of the catheter	catheter	catheter	Medical Devices	OTH	catheter device	catheter device	C0085590	catheter	RID5576
catheter	catheter	catheter	Medical Devices	OTH	catheter device	catheter device	C0085590	catheter	RID5576
catheter placement	catheter	catheter	Medical Devices	OTH	catheter device	catheter device	C0085590	catheter	RID5576
catheter course	catheter course	catheter course	Medical Devices	OTH	catheter device	catheter device	C0085590	catheter	RID5576
catheter tip	catheter tip	catheter tip	Medical Devices	OTH	device tip (physical object)	device tip (physical object)	C3872494
cauda equina	cauda equina	cauda equina	Anatomical Entities	LF	Cauda Equina	Cauda Equina	C0007458
cauda equina syndrome	cauda equina syndrome	cauda equina syndrome	Diseases and Disorders	NCD	Cauda Equina Syndrome	Cauda Equina Syndrome	C0392548
cavitary aspergillosis	cavitary aspergillosis	cavitary aspergillosis	Diseases and Disorders	CF	Aspergillosis	Aspergillosis	C0004030
cavitary pneumonia	cavitary pneumonia	cavitary pneumonia	Diseases and Disorders	CF	Pneumonia	Pneumonia	C0032285	pneumonia	RID5350
cavitation	cavitation	cavitation	Diseases and Disorders	PF	Cavitation	Cavitation	C1510420
cavities	cavities	cavity	Anatomical Entities	LF	Nasal cavity	Nasal cavity	C0027423
anterior chest wall cavity	cavity	cavity	Anatomical Entities	LF	anterior chest wall	Anterior chest wall structure	C0230132	anterior chest wall	RID29859
cavity	cavity	cavity	Anatomical Entities	LF	Oral cavity	Oral cavity	C0226896
cavoatrial junction	cavoatrial junction	cavoatrial junction	Anatomical Entities	LF	Junction Device	Junction Device	C1706311	cavoatrial	RID49446
cd4 count	cd4 count	CD4 count	Diagnostic Observations	COF	CD4 Count determination procedure	CD4 Count determination procedure	C0243009
cdiff	cdiff	clostridium difficile	Diseases and Disorders	COF	TIFF
cecal mass	cecal mass	cecal mass	Diseases and Disorders	NCD	cecal mass	cecal mass	C3670817
right cecal mass	cecal mass	cecal mass	Diseases and Disorders	NCD
cellcept	cellcept	cellcept	Treatment and Medications	OTH	Cellcept	Cellcept	C0592558
cellulitis	cellulitis	cellulitis	Diseases and Disorders	NCD	Cellulitis	Cellulitis	C0007642	cellulitis	RID34641
cement and fusions	cement and fusions	cement and fusion	Procedures and Surgeries	OTH	Fusion procedure	Fusion procedure	C1293131	fusion	RID3800
cementoplasty	cementoplasty	cementoplasty	Procedures and Surgeries	OTH	Cementoplasty	Cementoplasty	C2938992
central catheter	central catheter	central catheter	Medical Devices	OTH	catheter device	catheter device	C0085590	central, catheter	RID5827, RID5576
central catheter tip	central catheter tip	central catheter tip	Medical Devices	OTH	device tip (physical object)	device tip (physical object)	C3872494
central line	central line	central line	Medical Devices	OTH	lead line	lead line	C0544864
central line adjustment	central line	central line	Medical Devices	OTH	lead line	lead line	C0544864
central line insertion	central line	central line	Medical Devices	OTH	lead line	lead line	C0544864
central line placement	central line	central line	Medical Devices	OTH	lead line	lead line	C0544864
central line positioning	central line	central line	Medical Devices	OTH	lead line	lead line	C0544864
central line attempt	central line attempt	central line attempt	Procedures and Surgeries	Patient Info.	Attempt	Attempt	C1516084
central line catheter tip	central line catheter tip	central line catheter tip	Medical Devices	OTH	device tip (physical object)	device tip (physical object)	C3872494
central line tip	central line tip	central line tip	Medical Devices	OTH	device tip (physical object)	device tip (physical object)	C3872494
right subclavian central line tip	central line tip	central line tip	Medical Devices	OTH	device tip (physical object)	device tip (physical object)	C3872494
central pulmonary vasculature	central pulmonary vasculature	central pulmonary vasculature	Anatomical Entities	LF	lung vasculature development	lung vasculature development	C2610575	central, vasculature	RID5827, RID15989
central pulmonary vessels	central pulmonary vessels	central pulmonary vessel	Anatomical Entities	LF	Agenesis of pulmonary vessels	Agenesis of pulmonary vessels	C1970630	central, set of pulmonary vessels	RID5827, RID49865
engorged central pulmonary vessels	central pulmonary vessels	central pulmonary vessel	Anatomical Entities	LF	Agenesis of pulmonary vessels	Agenesis of pulmonary vessels	C1970630	central, set of pulmonary vessels	RID5827, RID49865
central venous access line	central venous access line	central venous access line	Medical Devices	OTH	lead line	lead line	C0544864
central venous catheter	central venous catheter	central venous catheter	Medical Devices	OTH	Catheterization, Central Venous	Catheterization, Central Venous	C0007435	central venous catheter	RID5578
central venous catheter placement	central venous catheter	central venous catheter	Medical Devices	OTH	Catheterization, Central Venous	Catheterization, Central Venous	C0007435	central venous catheter	RID5578
central venous catheter device	central venous catheter device	central venous catheter device	Medical Devices	OTH	Central venous catheter, device	Central venous catheter, device	C1145640	central venous catheter, portion of medical device	RID5578, RID29039
central venous catheter tip	central venous catheter tip	central venous catheter tip	Medical Devices	OTH	device tip (physical object)	device tip (physical object)	C3872494
central venous congestion	central venous congestion	central venous congestion	Diagnostic Observations	CF	Congestion	Congestion	C0700148	congestion	RID4863
central venous line	central venous line	central venous line	Medical Devices	OTH	lead line	lead line	C0544864
central venous line placement	central venous line	central venous line	Medical Devices	OTH	lead line	lead line	C0544864
central venous line attempt	central venous line attempt	central venous line attempt	Procedures and Surgeries	Patient Info.	Attempt	Attempt	C1516084
central venous line tip	central venous line tip	central venous line tip	Medical Devices	OTH	device tip (physical object)	device tip (physical object)	C3872494
central venous sheath	central venous sheath	central venous sheath	Medical Devices	OTH	Central venous pressure	Central venous pressure	C0428640	central, tendon sheath	RID5827, RID6069
centrilobular emphysema	centrilobular emphysema	centrilobular emphysema	Diseases and Disorders	CF	other emphysema	other emphysema	C0029607	emphysema	RID4799
cephalization	cephalization	cephalization	Diagnostic Observations	LF	Centralization	Centralization	C0680827	set of pulmonary vessels, pulmonary edema	RID49865, RID4866
cephalization of the pulmonary vascularity	cephalization	cephalization	Diagnostic Observations	LF	Centralization	Centralization	C0680827	set of pulmonary vessels, pulmonary edema	RID49865, RID4866
cephalization of the pulmonary vasculature	cephalization	cephalization	Diagnostic Observations	LF	Centralization	Centralization	C0680827	set of pulmonary vessels, pulmonary edema	RID49865, RID4866
cephalization of the pulmonary vessels	cephalization	cephalization	Diagnostic Observations	LF	Centralization	Centralization	C0680827	set of pulmonary vessels, pulmonary edema	RID49865, RID4866
cephalization of the upper lobe pulmonary vasculature	cephalization	cephalization	Diagnostic Observations	LF	Centralization	Centralization	C0680827	set of pulmonary vessels, pulmonary edema	RID49865, RID4866
cephalization of the vasculature	cephalization	cephalization	Diagnostic Observations	LF	Centralization	Centralization	C0680827	set of pulmonary vessels, pulmonary edema	RID49865, RID4866
pulmonary arteries cephalization	cephalization	cephalization	Diagnostic Observations	LF	Centralization	Centralization	C0680827	set of pulmonary vessels, pulmonary edema	RID49865, RID4866
cerclage wires	cerclage wires	cerclage wire	Medical Devices	OTH	wire device	wire device	C4522306	wire	RID5453
cerebral edema	cerebral edema	cerebral edema	Diseases and Disorders	COF	Edema	Edema	C0013604	edema	RID4865
cerebral palsy	cerebral palsy	cerebral palsy	Diseases and Disorders	NCD	Cerebral Palsy	Cerebral Palsy	C0007789	cerebral palsy	RID34633
cervical fixation hardware	cervical fixation hardware	cervical fixation hardware	Medical Devices	OTH	Psychological fixation	Psychological fixation	C0728733	cervical vertebral column	RID34571
cervical fusion	cervical fusion	cervical fusion	Procedures and Surgeries	OTH	Cervical	Cervical	C0205064	fusion	RID3800
cervical fusion device	cervical fusion device	cervical fusion device	Medical Devices	OTH	medical devices	medical devices	C0025080
cervical fusion hardware	cervical fusion hardware	cervical fusion hardware	Medical Devices	OTH	Cervical arthrodesis	Cervical arthrodesis	C0186010	fusion, cervical vertebral column	RID3800, RID34571
cervical hardware	cervical hardware	cervical hardware	Medical Devices	OTH	Cervical	Cervical	C0205064
cervical rib	cervical rib	cervical rib	Anatomical Entities	LF	cervical rib	cervical rib	C0158779	cervical ribs	RID39312
cervical spinal fusion hardware	cervical spinal fusion hardware	cervical spinal fusion hardware	Medical Devices	OTH	Spinal fusion	Spinal fusion	C3278509	spinal fusion	RID34797
cervical spinal hardware	cervical spinal hardware	cervical spinal hardware	Medical Devices	OTH	Cervical spinal nerve	Cervical spinal nerve	C0228815
cervical spine fixation device	cervical spine fixation device	cervical spine fixation device	Medical Devices	OTH	medical devices	medical devices	C0025080
cervical spine fusion hardware	cervical spine fusion hardware	cervical spine fusion hardware	Medical Devices	OTH	Cervical spine	Cervical spine	C0728985
cervical spine hardware	cervical spine hardware	cervical spine hardware	Medical Devices	OTH	Cervical spine	Cervical spine	C0728985	cervical vertebral column	RID34571
chain sutures	chain sutures	chain suture	Medical Devices	OTH	chain of objects	chain of objects	C1524075	cranial suture	RID9802
change	change	change	Diagnostic Observations	LF	Change -- procedure	Change -- procedure	C4319952	change	RID49896
change in the right humeral head	change	change	Diagnostic Observations	LF	Change -- procedure	Change -- procedure	C4319952	change	RID49896
gross interval change	change	change	Diagnostic Observations	LF	Change -- procedure	Change -- procedure	C4319952	change	RID49896
interval change	change	change	Diagnostic Observations	LF	Change -- procedure	Change -- procedure	C4319952	change	RID49896
little change	change	change	Diagnostic Observations	LF	Change -- procedure	Change -- procedure	C4319952	change	RID49896
major change	change	change	Diagnostic Observations	LF	Change -- procedure	Change -- procedure	C4319952	change	RID49896
no significant change	change	change	Diagnostic Observations	LF	Change -- procedure	Change -- procedure	C4319952	change	RID49896
radiograph interval change	change	change	Diagnostic Observations	LF	Change -- procedure	Change -- procedure	C4319952	change	RID49896
relevant change	change	change	Diagnostic Observations	LF	Change -- procedure	Change -- procedure	C4319952	change	RID49896
short-interval change	change	change	Diagnostic Observations	LF	Change -- procedure	Change -- procedure	C4319952	change	RID49896
short-term change	change	change	Diagnostic Observations	LF	Change -- procedure	Change -- procedure	C4319952	change	RID49896
significant change	change	change	Diagnostic Observations	LF	Change -- procedure	Change -- procedure	C4319952	change	RID49896
change in interpretation	change in interpretation	change in interpretation	Diagnostic Observations	PF	Change -- procedure	Change -- procedure	C4319952	change	RID49896
change in mental status	change in mental status	change in mental status	Symptoms and Signs	Patient Info.	Mental Status Change	Mental Status Change	C0856054	change	RID49896
acute changes	changes	change	Diagnostic Observations	LF	Change -- procedure	Change -- procedure	C4319952	change	RID49896
acute interval changes	changes	change	Diagnostic Observations	LF	Change -- procedure	Change -- procedure	C4319952	change	RID49896
acute lung changes	changes	change	Diagnostic Observations	LF	Change -- procedure	Change -- procedure	C4319952	change	RID49896
changes	changes	change	Diagnostic Observations	LF	Change -- procedure	Change -- procedure	C4319952	change	RID49896
changes in the lungs	changes	change	Diagnostic Observations	LF	Change -- procedure	Change -- procedure	C4319952	change	RID49896
chronic changes	changes	change	Diagnostic Observations	LF	Change -- procedure	Change -- procedure	C4319952	change	RID49896
chronic lung changes	changes	change	Diagnostic Observations	LF	Change -- procedure	Change -- procedure	C4319952	change	RID49896
interval changes	changes	change	Diagnostic Observations	LF	Change -- procedure	Change -- procedure	C4319952	change	RID49896
lung changes	changes	change	Diagnostic Observations	LF	Change -- procedure	Change -- procedure	C4319952	change	RID49896
other changes	changes	change	Diagnostic Observations	LF	Change -- procedure	Change -- procedure	C4319952	change	RID49896
pulmonary changes	changes	change	Diagnostic Observations	LF	Change -- procedure	Change -- procedure	C4319952	change	RID49896
recent changes	changes	change	Diagnostic Observations	LF	Change -- procedure	Change -- procedure	C4319952	change	RID49896
relevant changes	changes	change	Diagnostic Observations	LF	Change -- procedure	Change -- procedure	C4319952	change	RID49896
changes in opacity	changes in opacity	changes in opacity	Diagnostic Observations	LF	Change -- procedure	Change -- procedure	C4319952	change	RID49896
chemotherapy	chemotherapy	chemotherapy	Treatment and Medications	OTH	Chemotherapy	Chemotherapy	C3665472
chest	chest	chest	Anatomical Entities	LF	Chest	Chest	C0817096	hyperinflated	RID5884
hyperinflated chest	chest	chest	Anatomical Entities	LF	Chest	Chest	C0817096	hyperinflated	RID5884
chest bruising	chest bruising	chest bruising	Symptoms and Signs	Patient Info.	Contusion of chest	Contusion of chest	C0160925
chest burning	chest burning	chest burning	Symptoms and Signs	Patient Info.	chest burning	chest burning	C0740396
chest compression	chest compression	chest compression	Procedures and Surgeries	OTH	Compression	Compression	C0728907
chest congestion	chest congestion	chest congestion	Symptoms and Signs	Patient Info.	pulmonary congestion	pulmonary congestion	C0242073	congestion	RID4863
chest discomfort	chest discomfort	chest discomfort	Symptoms and Signs	Patient Info.	Chest discomfort	Chest discomfort	C0235710
chest drain	chest drain	chest drain	Medical Devices	OTH	Chest	Chest	C0817096	surgical drain	RID5610
chest heaviness	chest heaviness	chest heaviness	Symptoms and Signs	Patient Info.	chest heaviness	chest heaviness	C0742339
chest pain	chest pain	chest pain	Symptoms and Signs	Patient Info.	Chest Pain	Chest Pain	C0008031	chest pain	RID45774
chest port	chest port	chest port	Medical Devices	OTH
chest pressure	chest pressure	chest pressure	Symptoms and Signs	Patient Info.	Chest pressure	Chest pressure	C0438716	pressure	RID13034
chest surgery	chest surgery	chest surgery	Procedures and Surgeries	OTH	Surgery specialty	Surgery specialty	C0038894
chest tightness	chest tightness	chest tightness	Symptoms and Signs	Patient Info.	Chest tightness	Chest tightness	C0232292
chest tube	chest tube	chest tube	Medical Devices	OTH	Chest Tubes	Chest Tubes	C0008034	thoracostomy tube	RID5573
chest tube placement	chest tube	chest tube	Medical Devices	OTH	Chest Tubes	Chest Tubes	C0008034	thoracostomy tube	RID5573
chest tube position	chest tube	chest tube	Medical Devices	OTH	Chest Tubes	Chest Tubes	C0008034	thoracostomy tube	RID5573
chest tube removal	chest tube	chest tube	Medical Devices	OTH	Chest Tubes	Chest Tubes	C0008034	thoracostomy tube	RID5573
chest tube drain	chest tube drain	chest tube drain	Medical Devices	OTH	Chest Tubes	Chest Tubes	C0008034	thoracostomy tube	RID5573
chest tubes	chest tubes	chest tube	Medical Devices	OTH	Chest Tubes	Chest Tubes	C0008034	thoracostomy tube	RID5573
position of chest tubes	chest tubes	chest tube	Medical Devices	OTH	Chest Tubes	Chest Tubes	C0008034	thoracostomy tube	RID5573
chest wall	chest wall	chest wall	Anatomical Entities	LF	Chest wall structure	Chest wall structure	C0205076	chest wall	RID2468
chest wall drains	chest wall drains	chest wall drain	Medical Devices	OTH
chest wall emphysema	chest wall emphysema	chest wall emphysema	Diseases and Disorders	PF
chest wall pacer	chest wall pacer	chest wall pacer	Medical Devices	OTH
chest wall pacer device	chest wall pacer device	chest wall pacer device	Medical Devices	OTH
chest wall pain	chest wall pain	chest wall pain	Symptoms and Signs	Patient Info.	Chest wall pain	Chest wall pain	C0008035	chest wall	RID2468
chest wall port	chest wall port	chest wall port	Medical Devices	OTH	chest wall port			chest wall, port	RID2468, RID50336
chest wall resection	chest wall resection	chest wall resection	Procedures and Surgeries	OTH
chest wall tenderness	chest wall tenderness	chest wall tenderness	Diagnostic Observations	COF	Chest wall tenderness	Chest wall tenderness	C0239008	chest wall	RID2468
chf	chf	congestive heart failure	Diseases and Disorders	CF	congestive heart failure	congestive heart failure	C0018802	congestive, heart failure	RID6281, RID34795
chf admission	chf	chf	Diseases and Disorders	CF	congestive heart failure	congestive heart failure	C0018802	congestive, heart failure	RID6281, RID34795
chf findings	chf	congestive heart failure	Diseases and Disorders	CF	congestive heart failure	congestive heart failure	C0018802	congestive, heart failure	RID6281, RID34795
chf exacerbation	chf exacerbation	chf exacerbation	Diseases and Disorders	CF	congestive heart failure	congestive heart failure	C0018802	congestive, heart failure	RID6281, RID34795
chf infiltrate	chf infiltrate	congestive heart failure infiltrate	Diseases and Disorders	CF	congestive heart failure	congestive heart failure	C0018802	congestive, heart failure	RID6281, RID34795
chf with interstitial edema	chf with interstitial edema	chf with interstitial edema	Diseases and Disorders	CF	Edema	Edema	C0013604	edema	RID4865
chills	chills	chill	Symptoms and Signs	Patient Info.	Chills	Chills	C0085593
chin	chin	chin	Anatomical Entities	LF	Chin	Chin	C0008114
choking	choking	choke	Symptoms and Signs	Patient Info.	Choking	Choking	C0008301
cholangitis	cholangitis	cholangitis	Diseases and Disorders	NCD	Cholangitis	Cholangitis	C0008311	cholangitis	RID3384
cholecystectomy clips	cholecystectomy clips	cholecystectomy clip	Medical Devices	OTH	Surgical Clips	Surgical Clips	C0038917	surgical clip	RID5607
cholecystitis	cholecystitis	cholecystitis	Diseases and Disorders	NCD	Cholecystitis	Cholecystitis	C0008325
chronic abdominal pain	chronic abdominal pain	chronic abdominal pain	Symptoms and Signs	Patient Info.	Chronic abdominal pain	chronic	C0205191
chronic aspergillosis	chronic aspergillosis	chronic aspergillosis	Diseases and Disorders	CF	Chronic pulmonary aspergillosis	Chronic pulmonary aspergillosis	C4518624
chronic aspiration	chronic aspiration	chronic aspiration	Diseases and Disorders	Patient Info.	chronic	chronic	C0205191
chronic bronchitis	chronic bronchitis	chronic bronchitis	Diseases and Disorders	CF	Bronchitis	Bronchitis	C0006277
chronic cough	chronic cough	cough	Symptoms and Signs	Patient Info.	Coughing	Coughing	C0010200	cough	RID39051
chronic coughing	chronic coughing	chronic cough	Symptoms and Signs	Patient Info.	Coughing	Coughing	C0010200	chronic	RID5719
chronic dyspnea	chronic dyspnea	chronic dyspnea	Symptoms and Signs	Patient Info.	Chronic dyspnea	Chronic dyspnea	C5396924
chronic fibrotic interstitial lung disease	chronic fibrotic interstitial lung disease	chronic fibrotic interstitial lung disease	Diseases and Disorders	CF	Chronic lung disease	Chronic lung disease	C0746102	chronic, interstitial lung disease, middle lobe of lung	RID5719, RID28799, RID1310
chronic heart failure	chronic heart failure	heart failure	Diseases and Disorders	CF	Heart failure	Heart failure	C0018801	heart failure	RID34795
chronic interstitial disease	chronic interstitial disease	chronic interstitial disease	Diseases and Disorders	CF	Chronic interstitial lung disease	Chronic interstitial lung disease	C0746105	chronic, interstitial lung disease, interstitial	RID5719, RID28799, RID6251
chronic interstitial lung disease	chronic interstitial lung disease	chronic interstitial lung disease	Diseases and Disorders	CF	Chronic interstitial lung disease	Chronic interstitial lung disease	C0746105	interstitial, chronic, interstitial lung disease	RID6251, RID5719, RID28799
chronic kidney disease	chronic kidney disease	chronic kidney disease	Diseases and Disorders	NCD	Chronic Kidney Diseases	Chronic Kidney Diseases	C1561643
chronic lung disease	chronic lung disease	chronic lung disease	Diseases and Disorders	CF	Chronic lung disease	Chronic lung disease	C0746102	interstitial lung disease, chronic	RID28799, RID5719
chronic malnutrition	chronic malnutrition	chronic malnutrition	Diseases and Disorders	Patient Info.	Chronic malnutrition	Chronic malnutrition	C0746367
chronic nonhealing wound	chronic nonhealing wound	chronic nonhealing wound	Diseases and Disorders	Patient Info.	chronic	chronic	C0205191
chronic obstructive airway disease	chronic obstructive airway disease	chronic obstructive airway disease	Diseases and Disorders	CF	Chronic Obstructive Airway Disease	Chronic Obstructive Airway Disease	C0024117	chronic obstructive pulmonary disease	RID5317
chronic obstructive airway disease exacerbation	chronic obstructive airway disease exacerbation	chronic obstructive airway disease exacerbation	Diseases and Disorders	CF	Chronic Obstructive Airway Disease	Chronic Obstructive Airway Disease	C0024117	chronic obstructive pulmonary disease	RID5317
chronic obstructive airway disease/emphysema	chronic obstructive airway disease/emphysema	chronic obstructive airway disease/emphysema	Diseases and Disorders	CF	Chronic Obstructive Airway Disease	Chronic Obstructive Airway Disease	C0024117	chronic obstructive pulmonary disease	RID5317
chronic obstructive airways disease	chronic obstructive airways disease	chronic obstructive airway disease	Diseases and Disorders	CF	Chronic Obstructive Airway Disease	Chronic Obstructive Airway Disease	C0024117	chronic obstructive pulmonary disease	RID5317
chronic obstructive pulmonary disease	chronic obstructive pulmonary disease	chronic obstructive pulmonary disease	Diseases and Disorders	CF	Chronic Obstructive Airway Disease	Chronic Obstructive Airway Disease	C0024117	chronic obstructive pulmonary disease	RID5317
chronic pancreatitis	chronic pancreatitis	chronic pancreatitis	Diseases and Disorders	NCD	Pancreatitis	Pancreatitis	C0030305
chronic pulmonary disease	chronic pulmonary disease	chronic pulmonary disease	Diseases and Disorders	CF	Chronic pulmonary heart disease	Chronic pulmonary heart disease	C0238074	set of pulmonary vessels, chronic	RID49865, RID5719
chronic small airway obstruction	chronic small airways obstruction	chronic small airway obstruction	Diseases and Disorders	CF	chronic obstruction	chronic obstruction	C0333166	obstruction	RID4962
chronic small airways obstruction	chronic small airways obstruction	chronic small airway obstruction	Diseases and Disorders	CF	chronic obstruction	chronic obstruction	C0333166	obstruction	RID4962
chronic trach	chronic trach	chronic tracheostomy	Procedures and Surgeries	Patient Info.	chronic	chronic	C0205191
chronic underlying lung disease	chronic underlying lung disease	chronic underlying lung disease	Diseases and Disorders	CF	chronic	Lung diseases	C0024115	chronic	RID5719
chronicity	chronicity	chronicity	Diagnostic Observations	LF	Chronicity	Chronicity	C0547045
cirrhosis	cirrhosis	cirrhosis	Diseases and Disorders	NCD	Cirrhosis	Cirrhosis	C1623038	cirrhosis	RID3822
ckd	ckd	Chronic kidney disease	Diseases and Disorders	NCD	Chronic Kidney Diseases	Chronic Kidney Diseases	C1561643
ckd stage v	ckd	Chronic kidney disease	Diseases and Disorders	NCD	Chronic Kidney Diseases	Chronic Kidney Diseases	C1561643
ckd diabetic nephropathy	ckd diabetic nephropathy	ckd diabetic nephropathy	Diseases and Disorders	NCD	chronic kidney diseases	chronic kidney diseases	C1561643
ckd4	ckd4	Chronic kidney disease	Diseases and Disorders	NCD	Chronic Kidney Diseases	Chronic Kidney Diseases	C1561643
clavicular hardware	clavicular hardware	clavicular hardware	Medical Devices	OTH	Hardware Application	Hardware Application	C1711345
clear	clear	clear	Diagnostic Observations	LF	clear	clear	C2963144	clear	RID38670
lungs clear	clear	clear	Diagnostic Observations	LF	clear	clear	C2963144	clear	RID38670
clearance	clearance	clearance	Diagnostic Observations	LF	clear	clear	C2963144	clear	RID38670
clearing	clearing	clearing	Diagnostic Observations	LF	clear	clear	C2963144	clear	RID38670
clearing of the right base	clearing	clearing	Diagnostic Observations	LF	clear	clear	C2963144	clear	RID38670
clinical improvement	clinical improvement	clinical improvement	Diagnostic Observations	LF	Improvement	Improvement	C2986411
clinical presentation	clinical presentation	clinical presentation	Diagnostic Observations	LF	Clinical presentation	Clinical presentation	C2708283
clinical significance	clinical significance	clinical significance	Diagnostic Observations	LF	Vital Signs Clinical Significance	Vital Signs Clinical Significance	C2826635
clinical symptoms of pneumonia	clinical symptoms of pneumonia	clinical symptom of pneumonia	Symptoms and Signs	Patient Info.	Pneumonia	Pneumonia	C0032285	pneumonia	RID5350
clip	clip	clip	Medical Devices	OTH	Surgical Clips	Surgical Clips	C0038917	surgical clip	RID5607
upper abdominal clip	clip	clip	Medical Devices	OTH	Surgical Clips	Surgical Clips	C0038917	surgical clip	RID5607
clips	clips	clips	Medical Devices	OTH	Surgical Clips	Surgical Clips	C0038917	surgical clip	RID5607
upper abdominal clips	clips	clips	Medical Devices	OTH	Surgical Clips	Surgical Clips	C0038917	surgical clip	RID5607
cll	cll	chronic lymphocytic leukemia	Diseases and Disorders	NCD	Chronic Lymphocytic Leukemia	Chronic Lymphocytic Leukemia	C0023434
clostridium difficile	clostridium difficile	clostridium difficile	Diseases and Disorders	COF	Clostridium difficile	Clostridium difficile	C0079134
closure of patent foramen ovale	closure of patent foramen ovale	closure of patent foramen ovale	Procedures and Surgeries	OTH	Closure of patent foramen ovale	Closure of patent foramen ovale	C0189967
clot	clot	clot	Diagnostic Observations	CF	Blood Clot	Blood Clot	C0302148
cmv viremia	cmv viremia	CMV viremia	Diseases and Disorders	COF	Viremia	Viremia	C0042749
co2 retention	co2 retention	CO2 retention	Diagnostic Observations	COF	Retention (Psychology)	Retention (Psychology)	C0035280	retention	RID4984
coccidioidomycosis	coccidioidomycosis	coccidioidomycosis	Diseases and Disorders	CF	Coccidioidomycosis	Coccidioidomycosis	C0009186
coffee ground emesis	coffee ground emesis	coffee ground emesis	Symptoms and Signs	Patient Info.	Ground food	Ground food	C3714292
cognitive impairment	cognitive impairment	cognitive impairment	Symptoms and Signs	Patient Info.	No cognitive impairment	No cognitive impairment	C4230628
coiled tip of catheter	coiled tip of catheter	coil tip of catheter	Medical Devices	OTH	device tip (physical object)	device tip (physical object)	C3872494
coils	coils	coil	Medical Devices	OTH	Coil Device	Coil Device	C1705946	MR coil geometry	RID10639
colectomy	colectomy	colectomy	Procedures and Surgeries	OTH	Colectomy	Colectomy	C0009274
colitis	colitis	colitis	Diseases and Disorders	NCD	Colitis	Colitis	C0009319	colitis	RID3421
collapse	collapse	collapse	Diagnostic Observations	LF	Collapsed Lung	Collapse (finding)	C0344329	collapse	RID28506
left lower lobe collapse	collapse	collapse	Diagnostic Observations	LF	Collapsed Lung	Collapse (finding)	C0344329	collapse	RID28506
left lower lung collapse	collapse	collapse	Diagnostic Observations	LF	Collapsed Lung	Collapse (finding)	C0344329	collapse	RID28506
left upper lobe collapse	collapse	collapse	Diagnostic Observations	LF	Collapsed Lung	Collapse (finding)	C0344329	collapse	RID28506
lll collapse	collapse	collapse	Diagnostic Observations	LF	Collapsed Lung	Collapse (finding)	C0344329	collapse	RID28506
lobar collapse	collapse	collapse	Diagnostic Observations	LF	Collapsed Lung	Collapse (finding)	C0344329	collapse	RID28506
lobe collapse	collapse	collapse	Diagnostic Observations	LF	Collapsed Lung	Collapse (finding)	C0344329	collapse	RID28506
lower lobe collapse	collapse	collapse	Diagnostic Observations	LF	Collapsed Lung	Collapse (finding)	C0344329	collapse	RID28506
lung collapse	collapse	collapse	Diagnostic Observations	LF	Collapsed Lung	Collapse (finding)	C0344329	collapse	RID28506
partial lobar collapse	collapse	collapse	Diagnostic Observations	LF	Collapsed Lung	Collapse (finding)	C0344329	collapse	RID28506
partial lung collapse	collapse	collapse	Diagnostic Observations	LF	Collapsed Lung	Collapse (finding)	C0344329	collapse	RID28506
right lower lobe collapse	collapse	collapse	Diagnostic Observations	LF	Collapsed Lung	Collapse (finding)	C0344329	collapse	RID28506
right middle lobe collapse	collapse	collapse	Diagnostic Observations	LF	Collapsed Lung	Collapse (finding)	C0344329	collapse	RID28506
total right upper lobe collapse	collapse	collapse	Diagnostic Observations	LF	Collapsed Lung	Collapse (finding)	C0344329	collapse	RID28506
upper lobe collapse	collapse	collapse	Diagnostic Observations	LF	Collapsed Lung	Collapse (finding)	C0344329	collapse	RID28506
collapsed	collapsed	collapsed	Diagnostic Observations	LF	Collapsed Lung	Collapse (finding)	C0344329	collapse	RID28506
soft tissue collection of air	collection of air	air collection	Diagnostic Observations	PF	Collection (action)	Collection (action)	C1516698
apical collection of fluid	collection of fluid	collection of fluid	Diagnostic Observations	PF	Pleural fluid, Collection (action)	Pleural fluid, Collection (action)	C0225778, C1516698	fluid	RID1547
collection of fluid	collection of fluid	fluid collection	Diagnostic Observations	PF	Pleural fluid, Collection (action)	Collection (action)	C0225778, C1516698	fluid	RID1547
colon	colon	colon	Anatomical Entities	LF	Colon <insect>	Colon <insect>	C3888384	colon	RID31011
colon cancer	colon cancer	colon cancer	Diseases and Disorders	NCD	malignant tumor of colon	malignant tumor of colon	C0007102
colonic perforation	colonic perforation	colonic perforation	Diseases and Disorders	COF	Perforation (observation)	Perforation (observation)	C0549099
community acquired lung infection	community acquired lung infection	community acquire lung infection	Diseases and Disorders	CF	Infection	Infection	C3714514	infection	RID3710
community-acquired pneumonia	community-acquired pneumonia	community-acquired pneumonia	Diseases and Disorders	CF	Pneumonia	Pneumonia	C0032285	pneumonia	RID5350
comorbidities	comorbidities	comorbidity	Diseases and Disorders	NCD	Comorbidity	Comorbidity	C0009488
complete heart block	complete heart block	complete heart block	Diseases and Disorders	NCD	Heart Block	Heart Block	C0018794
complex of nodule and large bullae	complex of nodule and large bullae	complex of nodule and large bullae	Diseases and Disorders	PF	Nodule	Nodule	C0028259	pulmonary nodule	RID50149
complication	complication	complication	Diseases and Disorders	CF	Complication	Complication	C0009566	complication	RID11525
complications	complications	complication	Diseases and Disorders	CF	Complication	Complication	C0009566	complication	RID11525
apical component	component	component	Diagnostic Observations	LF	Component object	Component object	C0449432
component	component	component	Diagnostic Observations	LF	Component object	Component object	C0449432
parenchymal component	component	component	Diagnostic Observations	LF	Component object	Component object	C0449432
compressed lumbar vertebral body	compressed lumbar vertebral body	compressed lumbar vertebral body	Diagnostic Observations	PF	Structure of body of lumbar vertebra	Structure of body of lumbar vertebra	C0223486	compressed, lumbar vertebral body	RID5871, RID7770
compression	compression	compression	Diagnostic Observations	PF	Compression	Compression	C0728907	compression	RID4741
compression of the lung parenchyma	compression	compression	Diagnostic Observations	PF	Compression	Compression	C0728907	compression	RID4741
compression deformities	compression deformities	compression deformity	Diseases and Disorders	PF	Deformity	Deformity	C0302142	compression, deformity	RID4741, RID39218
thoracic compression deformities	compression deformities	compression deformity	Diseases and Disorders	PF	Deformity	Deformity	C0302142	deformity	RID39218
veterbral compression deformities	compression deformities	compression deformity	Diseases and Disorders	PF	Deformity	Deformity	C0302142	deformity	RID39218
wedge compression deformities	compression deformities	compression deformity	Diseases and Disorders	PF	Deformity	Deformity	C0302142	deformity	RID39218
compression deformity	compression deformity	compression deformity	Diseases and Disorders	PF	Deformity	Deformity	C0302142	deformity	RID39218
wedge compression deformity	compression deformity	compression deformity	Diseases and Disorders	PF	Deformity	Deformity	C0302142	deformity	RID39218
compression fracture	compression fracture	compression fracture	Diseases and Disorders	PF	Compression fracture	Compression fracture	C0521169	compression fracture	RID4658
l1 compression fracture	compression fracture	compression fracture	Diseases and Disorders	PF	Compression fracture	Compression fracture	C0521169	compression fracture	RID4658
lower thoracic compression fracture	compression fracture	compression fracture	Diseases and Disorders	PF	Compression fracture	Compression fracture	C0521169	compression fracture	RID4658
t8 compression fracture	compression fracture	compression fracture	Diseases and Disorders	PF	Compression fracture	Compression fracture	C0521169	compression fracture	RID4658
compression fractures	compression fractures	compression fracture	Diseases and Disorders	PF	Compression fracture	Compression fracture	C0521169	compression fracture	RID4658
thoracic compression fractures	compression fractures	compression fracture	Diseases and Disorders	PF	Compression fracture	Compression fracture	C0521169	compression fracture	RID4658
thoracic vertebral compression fractures	compression fractures	compression fracture	Diseases and Disorders	PF	Compression fracture	Compression fracture	C0521169	compression fracture	RID4658
vertebral compression fractures	compression fractures	compression fracture	Diseases and Disorders	PF	Compression fracture	Compression fracture	C0521169	compression fracture	RID4658
overall condition	condition	condition	Diagnostic Observations	LF	Condition	Condition	C0348080
condition stability	condition stability	condition stability	Diagnostic Observations	Patient Info.	Core Stability	RNA Stability	C0752249
cardiomediastinal configuration	configuration	configuration	Diagnostic Observations	LF	with configuration	with configuration	C0449830
configuration	configuration	configuration	Diagnostic Observations	LF	with configuration	with configuration	C0449830
configuration of the aorta	configuration	configuration	Diagnostic Observations	LF	with configuration	with configuration	C0449830
configuration of the thoracic aorta	configuration	configuration	Diagnostic Observations	LF	with configuration	with configuration	C0449830
heart configuration	configuration	configuration	Diagnostic Observations	LF	with configuration	with configuration	C0449830
left ventricular configuration	configuration	configuration	Diagnostic Observations	LF	with configuration	with configuration	C0449830
tracheal configuration	configuration	configuration	Diagnostic Observations	LF	with configuration	with configuration	C0449830
confluence of shadows	confluence of shadows	confluence of shadow	Diagnostic Observations	PF	shadow	shadow	C0332554
confluence of vessels	confluence of vessels	confluence of vessel	Anatomical Entities	LF	Blood Vessel	Blood Vessel	C0005847	upper lobe of right lung	RID1303
confluent area	confluent area	confluent area	Diagnostic Observations	PF	Area	Area	C0205146
confusion	confusion	confusion	Symptoms and Signs	Patient Info.	Confusion	Confusion	C0009676
congested cough	congested cough	cough	Symptoms and Signs	Patient Info.	Coughing	Coughing	C0010200	cough	RID39051
congested coughing	congested coughing	congested cough	Symptoms and Signs	Patient Info.	Coughing	Coughing	C0010200	cough	RID39051
cardiac congestion	congestion	congestion	Diagnostic Observations	CF	Congestion	Congestion	C0700148	congestion	RID4863
congestion	congestion	congestion	Diagnostic Observations	CF	Congestion	Congestion	C0700148	congestion	RID4863
hilar congestion	congestion	congestion	Diagnostic Observations	CF	Congestion	Congestion	C0700148	congestion	RID4863
mediastinal congestion	congestion	congestion	Diagnostic Observations	CF	Congestion	Congestion	C0700148	congestion	RID4863
congestion of the pulmonary vasculature	congestion of the pulmonary vasculature	congestion of the pulmonary vasculature	Diseases and Disorders	CF	Congestion	Congestion	C0700148	congestion	RID4863
congestion/edema	congestion/edema	congestion/edema	Diagnostic Observations	CF	Edema	Edema	C0013604	edema	RID4865
congestive cardiac failure	congestive cardiac failure	congestive cardiac failure	Diseases and Disorders	CF	Congestive heart failure	Congestive heart failure	C0018802	heart failure	RID34795
congestive change	congestive change	congestive change	Diagnostic Observations	CF	Change -- procedure	Change -- procedure	C4319952	change	RID49896
congestive failure	congestive failure	congestive failure	Diseases and Disorders	CF	Congestive heart failure	Congestive heart failure	C0018802	heart failure	RID34795
congestive heart failure	congestive heart failure	congestive heart failure	Diseases and Disorders	CF	Congestive heart failure	Congestive heart failure	C0018802	heart failure	RID34795
congestive heart failure admission	congestive heart failure	congestive heart failure	Diseases and Disorders	CF	Congestive heart failure	Congestive heart failure	C0018802	heart failure	RID34795
congestive heart failure exacerbation	congestive heart failure exacerbation	congestive heart failure	Diseases and Disorders	CF	Congestive heart failure	Congestive heart failure	C0018802	heart failure	RID34795
congestive heart failure findings	congestive heart failure findings	congestive heart failure	Diseases and Disorders	CF	Congestive heart failure	Congestive heart failure	C0018802	heart failure	RID34795
congestive heart failure infiltrate	congestive heart failure infiltrate	congestive heart failure infiltrate	Diseases and Disorders	CF	Congestive heart failure	Congestive heart failure	C0018802	heart failure	RID34795
congestive heart failure with interstitial edema	congestive heart failure with interstitial edema	congestive heart failure with interstitial edema	Diseases and Disorders	CF	Edema	Edema	C0013604	edema	RID4865
pulmonary vascular congestive pattern	congestive pattern	congestive pattern	Diagnostic Observations	PF	Pulmonary vascular system	Pulmonary vascular system	C0920994
pulmonary venous congestive pattern	congestive pattern	congestive pattern	Diagnostic Observations	PF	Congestive	Congestive	C0742742	congestive	RID6281
conglomerate	conglomerate	conglomerate	Diagnostic Observations	LF	Lymph Node State	Lymph Node State	C4086554	mediastinal lymph node, conglomerate	RID28891, RID5872
lymph node conglomerate	conglomerate	conglomerate	Diagnostic Observations	LF	Structure of pretracheal lymph node	Structure of pretracheal lymph node	C0229742	pretracheal lymph node	RID7725
pretracheal lymph node conglomerate	conglomerate	conglomerate	Diagnostic Observations	LF
consolidated	consolidated	consolidated	Diagnostic Observations	PF	Consolidation	Consolidation	C0702116	consolidation	RID43255
airspace consolidation	consolidation	consolidation	Diseases and Disorders	PF	Consolidation	Consolidation	C0702116	consolidation	RID43255
alveolar consolidation	consolidation	consolidation	Diseases and Disorders	PF	Consolidation	Consolidation	C0702116	consolidation	RID43255
basilar consolidation	consolidation	consolidation	Diseases and Disorders	PF	Consolidation	Consolidation	C0702116	consolidation	RID43255
confluent consolidation	consolidation	consolidation	Diseases and Disorders	PF	Consolidation	Consolidation	C0702116	consolidation	RID43255
consolidation	consolidation	consolidation	Diseases and Disorders	PF	Consolidation	Consolidation	C0702116	consolidation	RID43255
focal consolidation	consolidation	consolidation	Diseases and Disorders	PF	Consolidation	Consolidation	C0702116	consolidation	RID43255
left lower lobe consolidation	consolidation	consolidation	Diseases and Disorders	PF	Consolidation	Consolidation	C0702116	consolidation	RID43255
left retrocardiac consolidation	consolidation	consolidation	Diseases and Disorders	PF	Consolidation	Consolidation	C0702116	consolidation	RID43255
lingular consolidation	consolidation	consolidation	Diseases and Disorders	PF	Consolidation	Consolidation	C0702116	consolidation	RID43255
lll consolidation	consolidation	consolidation	Diseases and Disorders	PF	Consolidation	Consolidation	C0702116	consolidation	RID43255
lobar airspace consolidation	consolidation	consolidation	Diseases and Disorders	PF	Consolidation	Consolidation	C0702116	consolidation	RID43255
lobar consolidation	consolidation	consolidation	Diseases and Disorders	PF	Consolidation	Consolidation	C0702116	consolidation	RID43255
lung consolidation	consolidation	consolidation	Diseases and Disorders	PF	Consolidation	Consolidation	C0702116	consolidation	RID43255
parenchymal consolidation	consolidation	consolidation	Diseases and Disorders	PF	Consolidation	Consolidation	C0702116	consolidation	RID43255
peribronchial consolidation	consolidation	consolidation	Diseases and Disorders	PF	Consolidation	Consolidation	C0702116	consolidation	RID43255
perihilar consolidation	consolidation	consolidation	Diseases and Disorders	PF	Consolidation	Consolidation	C0702116	consolidation	RID43255
pneumonic consolidation	consolidation	consolidation	Diseases and Disorders	PF	Consolidation	Consolidation	C0702116	consolidation	RID43255
posterior lung consolidation	consolidation	consolidation	Diseases and Disorders	PF	Consolidation	Consolidation	C0702116	consolidation	RID43255
pulmonary consolidation	consolidation	consolidation	Diseases and Disorders	PF	Consolidation	Consolidation	C0702116	consolidation	RID43255
retrocardiac consolidation	consolidation	consolidation	Diseases and Disorders	PF	Consolidation	Consolidation	C0702116	consolidation	RID43255
right basal consolidation	consolidation	consolidation	Diseases and Disorders	PF	Consolidation	Consolidation	C0702116	consolidation	RID43255
right mid lung consolidation	consolidation	consolidation	Diseases and Disorders	PF	Consolidation	Consolidation	C0702116	consolidation	RID43255
right upper lobe consolidation	consolidation	consolidation	Diseases and Disorders	PF	Consolidation	Consolidation	C0702116	consolidation	RID43255
superimposed consolidation	consolidation	consolidation	Diseases and Disorders	PF	Consolidation	Consolidation	C0702116	consolidation	RID43255
alveolar consolidations	consolidations	consolidation	Diseases and Disorders	PF	Consolidation	Consolidation	C0702116	consolidation	RID43255
basal consolidations	consolidations	consolidation	Diseases and Disorders	PF	Consolidation	Consolidation	C0702116	consolidation	RID43255
bibasal consolidations	consolidations	consolidation	Diseases and Disorders	PF	Consolidation	Consolidation	C0702116	consolidation	RID43255
consolidations	consolidations	consolidation	Diseases and Disorders	PF	Consolidation	Consolidation	C0702116	consolidation	RID43255
focal consolidations	consolidations	consolidation	Diseases and Disorders	PF	Consolidation	Consolidation	C0702116	consolidation	RID43255
lung consolidations	consolidations	consolidation	Diseases and Disorders	PF	Consolidation	Consolidation	C0702116	consolidation	RID43255
multifocal consolidations	consolidations	consolidation	Diseases and Disorders	PF	Consolidation	Consolidation	C0702116	consolidation	RID43255
parenchymal consolidations	consolidations	consolidation	Diseases and Disorders	PF	Consolidation	Consolidation	C0702116	consolidation	RID43255
peribronchial consolidations	consolidations	consolidation	Diseases and Disorders	PF	Consolidation	Consolidation	C0702116	consolidation	RID43255
pulmonary consolidations	consolidations	consolidation	Diseases and Disorders	PF	Consolidation	Consolidation	C0702116	consolidation	RID43255
consolidative process	consolidative process	consolidative process	Diagnostic Observations	PF	Process	Process	C1522240	process	RID39128
abnormal contour	contour	contour	Diagnostic Observations	LF	contour	Contour form	C0876954	contour	RID5957
aortic contour	contour	contour	Diagnostic Observations	LF	contour	Contour form	C0876954	contour	RID5957
ascending aortic contour	contour	contour	Diagnostic Observations	LF	contour	Contour form	C0876954	contour	RID5957
bulging contour of the right mid mediastinum	contour	contour	Diagnostic Observations	LF	contour	Contour form	C0876954	contour	RID5957
cardiac contour	contour	contour	Diagnostic Observations	LF	contour	Contour form	C0876954	contour	RID5957
cardiomediastinal contour	contour	contour	Diagnostic Observations	LF	contour	Contour form	C0876954	contour	RID5957
contour	contour	contour	Diagnostic Observations	LF	contour	Contour form	C0876954	contour	RID5957
contour of right hemidiaphragm	contour	contour	Diagnostic Observations	LF	contour	Contour form	C0876954	contour	RID5957
contour of the lung base	contour	contour	Diagnostic Observations	LF	contour	Contour form	C0876954	contour	RID5957
contour of the right hemidiaphragm	contour	contour	Diagnostic Observations	LF	contour	Contour form	C0876954	contour	RID5957
diaphragmatic contour	contour	contour	Diagnostic Observations	LF	contour	Contour form	C0876954	contour	RID5957
heart contour	contour	contour	Diagnostic Observations	LF	contour	Contour form	C0876954	contour	RID5957
hemidiaphragmatic contour	contour	contour	Diagnostic Observations	LF	contour	Contour form	C0876954	contour	RID5957
left diaphragmatic contour	contour	contour	Diagnostic Observations	LF	contour	Contour form	C0876954	contour	RID5957
left heart contour	contour	contour	Diagnostic Observations	LF	contour	Contour form	C0876954	contour	RID5957
left ventricular contour	contour	contour	Diagnostic Observations	LF	contour	Contour form	C0876954	contour	RID5957
main pulmonary artery contour	contour	contour	Diagnostic Observations	LF	contour	Contour form	C0876954	contour	RID5957
mediastinal contour	contour	contour	Diagnostic Observations	LF	contour	Contour form	C0876954	contour	RID5957
mediastinum contour	contour	contour	Diagnostic Observations	LF	contour	Contour form	C0876954	contour	RID5957
right hemidiaphragmatic contour	contour	contour	Diagnostic Observations	LF	contour	Contour form	C0876954	contour	RID5957
tracheal contour	contour	contour	Diagnostic Observations	LF	contour	Contour form	C0876954	contour	RID5957
aortic contours	contours	contour	Diagnostic Observations	LF	contour	Contour form	C0876954	contour	RID5957
cardiac and mediastinal contours	contours	contour	Diagnostic Observations	LF	contour	Contour form	C0876954	contour	RID5957
cardiac contours	contours	contour	Diagnostic Observations	LF	contour	Contour form	C0876954	contour	RID5957
cardiomediastinal contours	contours	contour	Diagnostic Observations	LF	contour	Contour form	C0876954	contour	RID5957
contours	contours	contour	Diagnostic Observations	LF	contour	Contour form	C0876954	contour	RID5957
contours of the left hilus	contours	contour	Diagnostic Observations	LF	contour	Contour form	C0876954	contour	RID5957
diaphragmatic contours	contours	contour	Diagnostic Observations	LF	contour	Contour form	C0876954	contour	RID5957
heart contours	contours	contour	Diagnostic Observations	LF	contour	Contour form	C0876954	contour	RID5957
hilar contours	contours	contour	Diagnostic Observations	LF	contour	Contour form	C0876954	contour	RID5957
left hilar contours	contours	contour	Diagnostic Observations	LF	contour	Contour form	C0876954	contour	RID5957
mediastinal and cardiac contours	contours	contour	Diagnostic Observations	LF	contour	Contour form	C0876954	contour	RID5957
mediastinal and hilar contours	contours	contour	Diagnostic Observations	LF	contour	Contour form	C0876954	contour	RID5957
mediastinal contours	contours	contour	Diagnostic Observations	LF	contour	Contour form	C0876954	contour	RID5957
mediastinal hilar contours	contours	contour	Diagnostic Observations	LF	contour	Contour form	C0876954	contour	RID5957
pathologic contours	contours	contour	Diagnostic Observations	LF	contour	Contour form	C0876954	contour	RID5957
right cardiac contours	contours	contour	Diagnostic Observations	LF	contour	Contour form	C0876954	contour	RID5957
right mediastinal contours	contours	contour	Diagnostic Observations	LF	contour	Contour form	C0876954	contour	RID5957
right upper mediastinal contours	contours	contour	Diagnostic Observations	LF	contour	Contour form	C0876954	contour	RID5957
upper mediastinal contours	contours	contour	Diagnostic Observations	LF	contour	Contour form	C0876954	contour	RID5957
contrast agent	contrast agent	contrast agent	Medical Devices	OTH	Contrast Agent Name	Contrast Agent Name	C2347864	contrast agent	RID11582
contrast material	contrast material	contrast agent	Medical Devices	OTH	Contrast	Contrast	C1979874
contusion	contusion	contusion	Diseases and Disorders	CF	Contusion of lung	Contusion of lung	C0347625	contusion	RID4702
lung contusion	contusion	contusion	Diseases and Disorders	CF	Contusion of lung	Contusion of lung	C0347625	contusion	RID4702
contusions	contusions	contusion	Diseases and Disorders	CF	Contusion of lung	Contusion of lung	C0347625	contusion	RID4702
convexity	convexity	convexity	Diagnostic Observations	LF	Cerebral Convexity	Cerebral Convexity	C4329648	right, convexity	RID5825, RID5992
right hilar convexity	convexity	convexity	Diagnostic Observations	LF	Cerebral Convexity	Cerebral Convexity	C4329648	right, convexity	RID5825, RID5992
rounded convexity	convexity	convexity	Diagnostic Observations	LF
copd	copd	copd	Diseases and Disorders	CF	Chronic Obstructive Airway Disease	Chronic Obstructive Airway Disease	C0024117	chronic obstructive pulmonary disease	RID5317
copd exacerbation	copd exacerbation	copd	Diseases and Disorders	CF	Chronic Obstructive Airway Disease	Chronic Obstructive Airway Disease	C0024117	chronic obstructive pulmonary disease	RID5317
copd/emphysema	copd/emphysema	copd/emphysema	Diseases and Disorders	CF	Chronic Obstructive Airway Disease	Chronic Obstructive Airway Disease	C0024117	chronic obstructive pulmonary disease	RID5317
core-valve prosthesis	core-valve prosthesis	core-valve prosthesis	Medical Devices	OTH	Prosthesis	Prosthesis	C0175649
coronary artery bypass graft	coronary artery bypass graft	coronary artery bypass graft	Procedures and Surgeries	OTH	Coronary Artery Bypass Surgery	Coronary Artery Bypass Surgery	C0010055
coronary artery bypass graft clips	coronary artery bypass graft clips	coronary artery bypass graft clip	Medical Devices	OTH	Coronary Artery Bypass Surgery	Coronary Artery Bypass Surgery	C0010055
coronary artery bypass graft surgery	coronary artery bypass graft surgery	coronary artery bypass graft surgery	Procedures and Surgeries	OTH	Coronary Artery Bypass Surgery	Coronary Artery Bypass Surgery	C0010055
coronary artery bypass grafting	coronary artery bypass grafting	coronary artery bypass graft	Procedures and Surgeries	OTH	Coronary Artery Bypass Surgery	Coronary Artery Bypass Surgery	C0010055
coronary artery bypass surgery	coronary artery bypass surgery	coronary artery bypass surgery	Procedures and Surgeries	OTH	Coronary Artery Bypass Surgery	Coronary Artery Bypass Surgery	C0010055
coronary artery bypass surgery changes	coronary artery bypass surgery changes	coronary artery bypass surgery change	Medical Devices	OTH	Change -- procedure	Change -- procedure	C4319952	change	RID49896
coronary artery bypass surgery clips	coronary artery bypass surgery clips	coronary artery bypass surgery clip	Medical Devices	OTH	Coronary Artery Bypass Surgery	Coronary Artery Bypass Surgery	C0010055
coronary artery bypass surgery material	coronary artery bypass surgery material	coronary artery bypass surgery material	Medical Devices	OTH	Coronary Artery Bypass Surgery	Coronary Artery Bypass Surgery	C0010055
coronary artery bypass surgery procedure	coronary artery bypass surgery procedure	coronary artery bypass surgery procedure	Procedures and Surgeries	OTH	Coronary Artery Bypass Surgery	Coronary Artery Bypass Surgery	C0010055
coronary artery disease	coronary artery disease	coronary artery disease	Diseases and Disorders	NCD	Coronary Artery Disease	Coronary Artery Disease	C1956346
coronary artery stent	coronary artery stent	coronary artery stent	Medical Devices	OTH	Coronary artery stent (device)	Coronary artery stent (device)	C0687568	stent	RID5598
coronary artery stents	coronary artery stents	coronary artery stent	Medical Devices	OTH	Coronary artery stent (device)	Coronary artery stent (device)	C0687568	stent	RID5598
coronary bypass surgery	coronary bypass surgery	coronary bypass surgery	Procedures and Surgeries	OTH	Coronary Artery Bypass Surgery	Coronary Artery Bypass Surgery	C0010055
coronary disease	coronary disease	coronary disease	Diseases and Disorders	NCD	Coronary heart disease	Coronary heart disease	C0010068
coronary stent	coronary stent	coronary stent	Medical Devices	OTH	Coronary artery stent (device)	Coronary artery stent (device)	C0687568	stent	RID5598
coronary stenting	coronary stenting	coronary stenting	Procedures and Surgeries	OTH	Stent, device	Stent, device	C0038257	stent	RID5598
cortical margin	cortical margin	cortical margin	Anatomical Entities	LF	Nodule Margin Type	Nodule Margin Type	C4761388	cortical, margin	RID45765, RID5972
costophrenic	costophrenic	costophrenic	Anatomical Entities	LF	Costophrenic angle	Costophrenic angle	C0230151	costophrenic sulcus	RID1534
costophrenic angle	costophrenic angle	costophrenic angle	Anatomical Entities	LF	Costophrenic angle	Costophrenic angle	C0230151	costophrenic sulcus	RID1534
costophrenic angles	costophrenic angles	costophrenic angles	Anatomical Entities	LF	Costophrenic angle	Costophrenic angle	C0230151	costophrenic sulcus	RID1534
costophrenic sinus	costophrenic sinus	costophrenic sinus	Anatomical Entities	LF	Costophrenic angle	Costophrenic angle	C0230151	costophrenic sulcus	RID1534
costophrenic sinuses	costophrenic sinuses	costophrenic sinuses	Anatomical Entities	LF	Costophrenic angle	Costophrenic angle	C0230151	costophrenic sulcus	RID1534
costophrenic sulci	costophrenic sulci	costophrenic sulci	Anatomical Entities	LF	Costophrenic angle	Costophrenic angle	C0230151	costophrenic sulcus	RID1534
costophrenic sulcus	costophrenic sulcus	costophrenic sulcus	Anatomical Entities	LF	Costophrenic angle	Costophrenic angle	C0230151	costophrenic sulcus	RID1534
costopleural surfaces	costopleural surfaces	costopleural surface	Anatomical Entities	LF	Surface	Surface	C0205148	anatomical surface	RID13220
cough	cough	cough	Symptoms and Signs	Patient Info.	Coughing	Coughing	C0010200
coughing	coughing	cough	Symptoms and Signs	Patient Info.	Coughing	Coughing	C0010200
coughing blood	coughing blood	cough blood	Symptoms and Signs	Patient Info.	hemoptysis	hemoptysis	C0019079
coughing with congestion	coughing with congestion	cough with congestion	Symptoms and Signs	Patient Info.	Coughing	Coughing	C0010200	cough	RID39051
coumadin	coumadin	coumadin	Treatment and Medications	OTH	Coumadin	Coumadin	C0699129
course	course	course	Medical Devices	OTH	Course	Course	C0750729
course of the catheter	course of the catheter	course of the catheter	Medical Devices	OTH	catheter device	catheter device	C0085590	catheter	RID5576
course of the line	course of the line	course of the line	Medical Devices	OTH	lead line	lead line	C0544864
course of the tube	course of the tube	course of the tube	Medical Devices	OTH	tube	tube	C1561954	tube	RID5555
cp angle	cp angle	cp angle	Anatomical Entities	LF	Costophrenic angle	Costophrenic angle	C0230151	costophrenic sulcus	RID1534
cpr	cpr	cardiopulmonary Resuscitation	Procedures and Surgeries	OTH	Cardiopulmonary Resuscitation	Cardiopulmonary Resuscitation	C0007203
cr	cr	Cr	Diagnostic Observations	COF	Creatinine measurement	Creatinine measurement	C0201975
crackles	crackles	crackle	Diagnostic Observations	COF	Rales	Rales	C0034642
right basilar crackles	crackles	crackle	Diagnostic Observations	COF	Basilar Rales	Basilar Rales	C0240859
rll crackles	crackles	crackle	Diagnostic Observations	COF	Rales	Rales	C0034642
craniotomy	craniotomy	craniotomy	Procedures and Surgeries	OTH	Craniotomy	Craniotomy	C0010280
creatinine	creatinine	creatinine	Diagnostic Observations	COF	creatinine	creatinine	C0010294
crest	crest	CREST syndrome	Diseases and Disorders	NCD	Crest	Crest	C2948667
crohns	crohns	crohn	Diseases and Disorders	NCD	Crohn Disease	Crohn Disease	C0010346
crohns disease	crohns disease	Crohn disease	Diseases and Disorders	NCD	Crohn Disease	Crohn Disease	C0010346	interstitial lung disease	RID28799
bronchovascular crowding	crowding	crowding	Diagnostic Observations	LF	crowding	crowding	C0010383
crowding	crowding	crowding	Diagnostic Observations	LF	crowding	crowding	C0010383
crowding of bronchovascular markings	crowding	crowding	Diagnostic Observations	LF	crowding	crowding	C0010383
crowding of bronchovascular structures	crowding	crowding	Diagnostic Observations	LF	crowding	crowding	C0010383
crowding of pulmonary vessels	crowding	crowding	Diagnostic Observations	LF	crowding	crowding	C0010383
crowding of the bronchovascular markings	crowding	crowding	Diagnostic Observations	LF	crowding	crowding	C0010383
crowding of the bronchovascular structures	crowding	crowding	Diagnostic Observations	LF	crowding	crowding	C0010383
crowding of the perihilar vasculature	crowding	crowding	Diagnostic Observations	LF	crowding	crowding	C0010383
crowding of the pulmonary vasculature	crowding	crowding	Diagnostic Observations	LF	crowding	crowding	C0010383
crowding of the vascular and bronchial structures	crowding	crowding	Diagnostic Observations	LF	crowding	crowding	C0010383
crowding of vasculature	crowding	crowding	Diagnostic Observations	LF	crowding	crowding	C0010383
crowding of vessels	crowding	crowding	Diagnostic Observations	LF	crowding	crowding	C0010383
vascular crowding	crowding	crowding	Diagnostic Observations	LF	crowding	crowding	C0010383
crrt	crrt	continuous renal re-therapy	Procedures and Surgeries	OTH	Renal Replacement Therapy	Renal Replacement Therapy	C0206074
crying	crying	cry	Symptoms and Signs	Patient Info.	Crying	Crying	C0010399
cryptococcosis	cryptococcosis	cryptococcosis	Diseases and Disorders	CF	Cryptococcosis	Cryptococcosis	C5235087
cryptogenic organizing pneumonia	cryptogenic organizing pneumonia	cryptogenic organizing pneumonia	Diseases and Disorders	CF	Pneumonia	Pneumonia	C0032285	pneumonia	RID5350
cs lead	cs lead	coronary sinus lead	Medical Devices	OTH	Leads (device)	Leads (device)	C0181586	lead	RID11924
csf leak	csf leak	csf leak	Diseases and Disorders	COF	Gel Leak	Gel Leak	C1880936
ct of the thorax	ct of the thorax	CT of the thorax	Procedures and Surgeries	OTH	Long thorax	Long thorax	C0575484	thorax	RID1243
cuff	cuff	cuff	Medical Devices	OTH	Rotator Cuff	Rotator Cuff	C0085515
curvature	curvature	curvature	Diagnostic Observations	LF	Curvature of spine	Curvature of spine	C0037932
curvature of the thoracic spine	curvature	curvature	Diagnostic Observations	LF	Thoracic spine structure	Thoracic spine structure	C0581269
rightward convex curvature	curvature	curvature	Diagnostic Observations	LF	Right alar curvature point	Right alar curvature point	C4244953
cutaneous clips	cutaneous clips	cutaneous clip	Medical Devices	OTH	Surgical Clips	Surgical Clips	C0038917	surgical clip	RID5607
cva	cva	CVA	Diseases and Disorders	NCD	Cerebrovascular accident	Cerebrovascular accident	C0038454
cvl	cvl	central venous line	Medical Devices	OTH	lead line	lead line	C0544864
cvl placement	cvl	central venous line	Medical Devices	OTH	lead line	lead line	C0544864
cvp attempt	cvp attempt	central venous pressure attempt	Procedures and Surgeries	Patient Info.	cyclophosphamide/prednisone/vincristine protocol	cyclophosphamide/prednisone/vincristine protocol	C0056633
cvvh	cvvh	continuous veno-venous hemofiltration	Procedures and Surgeries	OTH	Continuous Venovenous Hemodialysis	Continuous Venovenous Hemodialysis	C0472681
cystic lung disease	cystic lung disease	cystic lung disease	Diseases and Disorders	CF	Cystic Disease Of Lung	Cystic Disease Of Lung	C1384901	cystic	RID5739
cystogastrostomy	cystogastrostomy	cystogastrostomy	Procedures and Surgeries	OTH	Cystogastrostomy (body structure)	Cystogastrostomy (body structure)	C0448973
dah	dah	diffuse alveolar hemorrhage	Diseases and Disorders	CF	Hyperthyroxinemia, Familial Dysalbuminemic	Hyperthyroxinemia, Familial Dysalbuminemic	C0342185
dark fluid	dark fluid	dark fluid	Diagnostic Observations	Patient Info.	Pleural fluid	Pleural fluid	C0225778	fluid	RID1547
dc hd line	dc hd line	DC hemodialysis line	Medical Devices	OTH	lead line	lead line	C0544864
dchf	dchf	Decompensated Chronic Heart Failure	Diseases and Disorders	CF	Congestive heart failure	Congestive heart failure	C0018802
ddrt	ddrt	Deceased donor renal transplantation	Procedures and Surgeries	OTH	DDR1 gene	DDR1 gene	C1333206
debridement	debridement	debridement	Procedures and Surgeries	OTH	Debridement	Debridement	C0011079
decompensated cirrhosis	decompensated cirrhosis	decompensated cirrhosis	Diseases and Disorders	NCD	Decompensated cirrhosis of liver	Decompensated cirrhosis of liver	C1619727
decompensation	decompensation	decompensation	Diseases and Disorders	CF	Decompensation	Decompensation	C0231187
decortication	decortication	decortication	Procedures and Surgeries	OTH	Cerebral Decortication	Cerebral Decortication	C0007778
decortication procedure	decortication procedure	decortication procedure	Procedures and Surgeries	OTH	Cerebral Decortication	Cerebral Decortication	C0007778	procedure	RID1559
decrease of the right hemithorax	decrease	decrease	Diagnostic Observations	LF	Right thorax structure	Right thorax structure	C0230127	right, right hemithorax	RID5825, RID29979
decreased arousal	decreased arousal	decrease arousal	Symptoms and Signs	Patient Info.	Arousal	Arousal	C0003808
decreased breath sounds	decreased breath sounds	decrease breath sound	Diagnostic Observations	COF	Abnormal breath sounds	Abnormal breath sounds	C0231856
deep vein thrombosis	deep vein thrombosis	deep vein thrombosis	Diseases and Disorders	NCD	Deep Vein Thrombosis	Deep Vein Thrombosis	C0149871
deep venous thrombosis	deep venous thrombosis	deep venous thrombosis	Diseases and Disorders	NCD	Venous Thrombosis	Venous Thrombosis	C0042487
defect	defect	defect	Diagnostic Observations	LF
rib defect	defect	defect	Diagnostic Observations	LF	Defect	Defect	C1457869
defibrillator leads	defibrillator leads	defibrillator lead	Medical Devices	OTH	Leads (device)	Leads (device)	C0181586	lead	RID11924
deficiency	deficiency	deficiency	Diagnostic Observations	LF	deficiency aspects	deficiency aspects	C1623416
vascular deficiency	deficiency	deficiency	Diagnostic Observations	LF
deformities	deformities	deformity	Diagnostic Observations	PF	Deformity	Deformity	C0302142	deformity	RID39218
left ribcage deformities	deformities	deformity	Diagnostic Observations	PF	Deformity	Deformity	C0302142	deformity	RID39218
rib cage deformities	deformities	deformity	Diagnostic Observations	PF	Deformity	Deformity	C0302142	deformity	RID39218
rib deformities	deformities	deformity	Diagnostic Observations	PF	Deformity	Deformity	C0302142	deformity	RID39218
right rib deformities	deformities	deformity	Diagnostic Observations	PF	Deformity	Deformity	C0302142	deformity	RID39218
deformities/fractures	deformities/fractures	deformity/fracture	Diseases and Disorders	PF	Fracture	Fracture	C0016658	fracture	RID4650
rib deformities/fractures	deformities/fractures	deformity/fracture	Diseases and Disorders	PF	Fracture	Fracture	C0016658	fracture	RID4650
chest cage deformity	deformity	deformity	Diagnostic Observations	PF	Deformity	Deformity	C0302142	deformity	RID39218
chest wall deformity	deformity	deformity	Diagnostic Observations	PF	Deformity	Deformity	C0302142	deformity	RID39218
clavicle deformity	deformity	deformity	Diagnostic Observations	PF	Deformity	Deformity	C0302142	deformity	RID39218
clavicular deformity	deformity	deformity	Diagnostic Observations	PF	Deformity	Deformity	C0302142	deformity	RID39218
clavicular midshaft deformity	deformity	deformity	Diagnostic Observations	PF	Deformity	Deformity	C0302142	deformity	RID39218
clavicular shaft deformity	deformity	deformity	Diagnostic Observations	PF	Deformity	Deformity	C0302142	deformity	RID39218
deformity	deformity	deformity	Diagnostic Observations	PF	Deformity	Deformity	C0302142	deformity	RID39218
deformity of the distal right clavicle	deformity	deformity	Diagnostic Observations	PF	Deformity	Deformity	C0302142	deformity	RID39218
deformity of the right clavicle	deformity	deformity	Diagnostic Observations	PF	Deformity	Deformity	C0302142	deformity	RID39218
deformity of the right humeral head	deformity	deformity	Diagnostic Observations	PF	Deformity	Deformity	C0302142	deformity	RID39218
deformity of the right upper chest wall	deformity	deformity	Diagnostic Observations	PF	Deformity	Deformity	C0302142	deformity	RID39218
right rib deformity	deformity	deformity	Diagnostic Observations	PF	Deformity	Deformity	C0302142	deformity	RID39218
right upper rib cage deformity	deformity	deformity	Diagnostic Observations	PF	Deformity	Deformity	C0302142	deformity	RID39218
scoliotic deformity	deformity	deformity	Diagnostic Observations	PF	Deformity	Deformity	C0302142	deformity	RID39218
tracheal deformity	deformity	deformity	Diagnostic Observations	PF	Deformity	Deformity	C0302142	deformity	RID39218
wedge deformity	deformity	deformity	Diagnostic Observations	PF	Deformity	Deformity	C0302142	deformity	RID39218
deformity/fracture	deformity/fracture	deformity/fracture	Diseases and Disorders	PF	Deformity	Deformity	C0302142	deformity	RID39218
rib deformity/fracture	deformity/fracture	deformity/fracture	Diseases and Disorders	PF	Deformity	Deformity	C0302142	deformity	RID39218
disc degeneration	degeneration	degeneration	Diagnostic Observations	PF	Intervertebral Disc Degeneration	Intervertebral Disc Degeneration	C0158266	degeneration	RID5045
degenerative change	degenerative change	degenerative change	Diagnostic Observations	PF	Change -- procedure	Change -- procedure	C4319952	change	RID49896
acromio-clavicular degenerative changes	degenerative changes	degenerative change	Diagnostic Observations	PF	Change -- procedure	Change -- procedure	C4319952	change	RID49896
bilateral glenohumeral joint degenerative changes	degenerative changes	degenerative change	Diagnostic Observations	PF	Change -- procedure	Change -- procedure	C4319952	change	RID49896
degenerative changes	degenerative changes	degenerative change	Diagnostic Observations	PF	Change -- procedure	Change -- procedure	C4319952	change	RID49896
degree of inspiration	degree of inspiration	degree of inspiration	Diagnostic Observations	PF	Inspiration function	Inspiration function	C0004048
dehydration	dehydration	dehydration	Diseases and Disorders	Patient Info.	Dehydration	Dehydration	C0011175
delayed healing	delayed healing	delayed healing	Diagnostic Observations	PF	Delayed healing of wound	Delayed healing of wound	C5200936	delayed, healing	RID39065, RID6352
delirious	delirious	delirious	Symptoms and Signs	Patient Info.	Delirium	Delirium	C0011206
delirium	delirium	delirium	Diseases and Disorders	NCD	Delirium	Delirium	C0011206
dementia	dementia	dementia	Diseases and Disorders	NCD	Dementia	Dementia	C0497327
demineralization	demineralization	demineralization	Diagnostic Observations	PF	decalcification	decalcification	C0700185	demineralization	RID5387
calcific densities	densities	density	Diagnostic Observations	LF	density	density	C0178587	density	RID39166
densities	densities	density	Diagnostic Observations	LF	density	density	C0178587	density	RID39166
diffuse densities	densities	density	Diagnostic Observations	LF	density	density	C0178587	density	RID39166
hazy densities	densities	density	Diagnostic Observations	LF	density	density	C0178587	density	RID39166
linear densities	densities	density	Diagnostic Observations	LF	density	density	C0178587	density	RID39166
nodular densities	densities	density	Diagnostic Observations	LF	density	density	C0178587	density	RID39166
parenchymal densities	densities	density	Diagnostic Observations	LF	density	density	C0178587	density	RID39166
pleural densities	densities	density	Diagnostic Observations	LF	density	density	C0178587	density	RID39166
pulmonary parenchymal densities	densities	density	Diagnostic Observations	LF	density	density	C0178587	density	RID39166
right upper lobe densities	densities	density	Diagnostic Observations	LF	density	density	C0178587	density	RID39166
asymmetric density	density	density	Diagnostic Observations	LF	density	density	C0178587	density	RID39166
bone density	density	density	Diagnostic Observations	LF	density	density	C0178587	density	RID39166
calcific density	density	density	Diagnostic Observations	LF	density	density	C0178587	density	RID39166
curvilinear density	density	density	Diagnostic Observations	LF	density	density	C0178587	density	RID39166
dense retrocardiac density	density	density	Diagnostic Observations	LF	density	density	C0178587	density	RID39166
density	density	density	Diagnostic Observations	LF	density	density	C0178587	density	RID39166
focal density	density	density	Diagnostic Observations	LF	density	density	C0178587	density	RID39166
hazy density	density	density	Diagnostic Observations	LF	density	density	C0178587	density	RID39166
increase density	density	density	Diagnostic Observations	LF	density	density	C0178587	density	RID39166
increased bone density	density	density	Diagnostic Observations	LF	density	density	C0178587	density	RID39166
increased density	density	density	Diagnostic Observations	LF	density	density	C0178587	density	RID39166
increased density of the liver	density	density	Diagnostic Observations	LF	density	density	C0178587	density	RID39166
increased retrocardiac density	density	density	Diagnostic Observations	LF	density	density	C0178587	density	RID39166
linear density	density	density	Diagnostic Observations	LF	density	density	C0178587	density	RID39166
loculated pleural density	density	density	Diagnostic Observations	LF	density	density	C0178587	density	RID39166
multifocal density	density	density	Diagnostic Observations	LF	density	density	C0178587	density	RID39166
nodular density	density	density	Diagnostic Observations	LF	density	density	C0178587	density	RID39166
parenchymal density	density	density	Diagnostic Observations	LF	density	density	C0178587	density	RID39166
pleural density	density	density	Diagnostic Observations	LF	density	density	C0178587	density	RID39166
retrocardiac density	density	density	Diagnostic Observations	LF	density	density	C0178587	density	RID39166
retrocardiac linear density	density	density	Diagnostic Observations	LF	density	density	C0178587	density	RID39166
right infrahilar density	density	density	Diagnostic Observations	LF	density	density	C0178587	density	RID39166
rounded density	density	density	Diagnostic Observations	LF	density	density	C0178587	density	RID39166
soft tissue density	density	density	Diagnostic Observations	LF	density	density	C0178587	density	RID39166
vertical density	density	density	Diagnostic Observations	LF	density	density	C0178587	density	RID39166
wire-like density	density	density	Diagnostic Observations	LF	density	density	C0178587	density	RID39166
density and opacities	density and opacities	density and opacity	Diagnostic Observations	LF	density	density	C0178587	density	RID39166
density and opacity	density and opacity	density and opacity	Diagnostic Observations	LF	density	density	C0178587	density	RID39166
density of opacification	density of opacification	density of opacification	Diagnostic Observations	LF	density	density	C0178587	density	RID39166
dependent edema	dependent edema	dependent edema	Diagnostic Observations	CF	Edema	Edema	C0013604	edema	RID4865
desat	desat	desaturation	Diagnostic Observations	COF	Oxygen saturation below reference range
desating	desating	desaturation	Diagnostic Observations	COF	Oxygen saturation below reference range	Oxygen saturation below reference range	C0746961
desats	desats	desaturation	Diagnostic Observations	COF	COL4A5 gene	COL4A5 gene	C1413586
desats to 70s	desats to 70s	desaturation to 70s	Diagnostic Observations	COF	COL4A5 gene	COL4A5 gene	C1413586
desaturation	desaturation	desaturation	Diagnostic Observations	COF	Oxygen desaturation on exertion	Oxygen desaturation on exertion	C4280731
desaturations	desaturations	desaturation	Diagnostic Observations	COF	Oxygen saturation below reference range	Oxygen saturation below reference range	C0746961
descending aorta	descending aorta	descending aorta	Anatomical Entities	LF	Descending aorta	Descending aorta	C0011666	descending aorta	RID481
descending thoracic aorta	descending thoracic aorta	descending thoracic aorta	Anatomical Entities	LF	Descending thoracic aorta	Descending thoracic aorta	C3163626	descending thoracic aorta	RID35844
deshiscences	deshiscences	dehiscence	Diagnostic Observations	PF	Dehiscence
destruction	destruction	destruction	Diagnostic Observations	LF	Destruction (action)	Destruction (action)	C1948029	lytic	RID45729
emphysematous lung parenchymal destruction	destruction	destruction	Diagnostic Observations	LF	emphysematous	Emphysematous	C0333159	emphysematous	RID5876
lytic destruction	destruction	destruction	Diagnostic Observations	LF	Destruction (action)	Destruction (action)	C1948029	lytic	RID45729
developmental delay	developmental delay	developmental delay	Diseases and Disorders	Patient Info.	Genes, Developmental	Genes, Developmental	C0017340
deviation of the cardiomediastinal silhouette	deviation	deviation	Diagnostic Observations	LF	Protocol Deviation	Protocol Deviation	C1705236	deviation position	RID10445
deviation of the mediastinum	deviation	deviation	Diagnostic Observations	LF	Protocol Deviation	Protocol Deviation	C1705236	deviation position	RID10445
deviation of the superior trachea	deviation	deviation	Diagnostic Observations	LF	Protocol Deviation	Protocol Deviation	C1705236	deviation position	RID10445
deviation of the trachea	deviation	deviation	Diagnostic Observations	LF	Protocol Deviation	Protocol Deviation	C1705236	deviation position	RID10445
leftward deviation of the trachea	deviation	deviation	Diagnostic Observations	LF	Protocol Deviation	Protocol Deviation	C1705236	deviation position	RID10445
rightward deviation of the trachea	deviation	deviation	Diagnostic Observations	LF	Protocol Deviation	Protocol Deviation	C1705236	deviation position	RID10445
trachea deviation	deviation	deviation	Diagnostic Observations	LF	Protocol Deviation	Protocol Deviation	C1705236	deviation position	RID10445
tracheal deviation	deviation	deviation	Diagnostic Observations	LF	Protocol Deviation	Protocol Deviation	C1705236	deviation position	RID10445
device	device	device	Medical Devices	OTH	medical devices	medical devices	C0025080
devices	devices	devices	Medical Devices	OTH	medical devices	medical devices	C0025080
dextroscoliosis	dextroscoliosis	dextroscoliosis	Diseases and Disorders	PF	Dextroscoliosis	Dextroscoliosis	C3494893	dextroscoliosis	RID4757
dht	dht	dihydrotestosterone	Medical Devices	OTH	DHT brand of dihydrotachyesterol	DHT brand of dihydrotachyesterol	C0740174
diabetes	diabetes	diabetes	Diseases and Disorders	NCD	Diabetes	Diabetes	C0011847
diabetes insipidus	diabetes insipidus	diabetes insipidus	Diseases and Disorders	NCD	Diabetes Insipidus	Diabetes Insipidus	C0011848
diabetes mellitus	diabetes mellitus	diabetes mellitus	Diseases and Disorders	NCD	Diabetes Mellitus	Diabetes Mellitus	C0011849
diabetic	diabetic	diabetic	Diseases and Disorders	NCD	diabetic	diabetic	C0241863
diabetic ketoacidosis	diabetic ketoacidosis	diabetic ketoacidosis	Diseases and Disorders	NCD	Diabetic Ketoacidosis	Ketoacidosis	C0220982
diabetic nephropathy	diabetic nephropathy	diabetic nephropathy	Diseases and Disorders	NCD	Diabetic Nephropathy	Diabetic Nephropathy	C0011881
dialysis	dialysis	dialysis	Procedures and Surgeries	OTH	Physical Dialysis	Physical Dialysis	C0011945
dialysis catheter	dialysis catheter	dialysis catheter	Medical Devices	OTH	Dialysis catheter	Dialysis catheter	C0179747	catheter	RID5576
dialysis catheter orifices	dialysis catheter orifices	dialysis catheter orifice	Medical Devices	OTH	Dialysis catheter	Dialysis catheter	C0179747	catheter	RID5576
dialysis catheter tip	dialysis catheter tip	dialysis catheter tip	Medical Devices	OTH	device tip (physical object)	device tip (physical object)	C3872494
dialysis line	dialysis line	dialysis line	Medical Devices	OTH	lead line	lead line	C0544864
chest diameter	diameter	diameter	Diagnostic Observations	LF	diameter (qualifier value)	diameter (qualifier value)	C1301886	diameter	RID13432
diameter	diameter	diameter	Diagnostic Observations	LF	diameter (qualifier value)	diameter (qualifier value)	C1301886	diameter	RID13432
vascular diameters	diameters	diameter	Diagnostic Observations	LF	diameter (qualifier value)	diameter (qualifier value)	C1301886	diameter	RID13432
diaphoresis	diaphoresis	diaphoresis	Symptoms and Signs	Patient Info.	Increased sweating	Increased sweating	C0700590
diaphoretic	diaphoretic	diaphoretic	Symptoms and Signs	Patient Info.	Diaphoretic	Diaphoretic	C1707737
diaphragm	diaphragm	diaphragm	Anatomical Entities	LF	Respiratory Diaphragm	Respiratory Diaphragm	C0011980	diaphragm	RID1524
right-sided diaphragm	diaphragm	diaphragm	Anatomical Entities	LF	Respiratory Diaphragm	Respiratory Diaphragm	C0011980	diaphragm	RID1524
diaphragms	diaphragms	diaphragm	Anatomical Entities	LF	Respiratory Diaphragm	Respiratory Diaphragm	C0011980	diaphragm	RID1524
diarrhea	diarrhea	diarrhea	Symptoms and Signs	Patient Info.	Diarrhea	Diarrhea	C0011991	diarrhea	RID39082
diastolic chf	diastolic chf	diastolic chf	Diseases and Disorders	CF	congestive heart failure	congestive heart failure	C0018802	congestive, heart failure	RID6281, RID34795
diastolic congestive heart failure	diastolic congestive heart failure	diastolic congestive heart failure	Diseases and Disorders	CF	Congestive heart failure	Congestive heart failure	C0018802	heart failure	RID34795
diastolic heart failure	diastolic heart failure	diastolic heart failure	Diseases and Disorders	CF	Heart failure	Diastolic hypertension	C0235222
diastolic hf	diastolic hf	diastolic heart failure	Diseases and Disorders	CF	Late diastolic murmur	Late diastolic murmur	C0920079
substantial difference	difference	difference	Diagnostic Observations	LF	Different	Different	C1705242
difficultly breathing	difficultly breathing	difficultly breathing	Symptoms and Signs	Patient Info.	Inspiration function	Inspiration function	C0004048
difficultly swallowing	difficultly swallowing	difficultly swallow	Symptoms and Signs	Patient Info.	Swallowing G-code	Swallowing G-code	C4281783	swallowing	RID39244
difficulty breathing	difficulty breathing	difficulty breathing	Symptoms and Signs	Patient Info.	No Difficulty	No Difficulty	C5238452
difficulty in breathing	difficulty in breathing	difficulty in breathing	Symptoms and Signs	Patient Info.	No Difficulty	Inspiration function	C0004048
difficulty speaking	difficulty speaking	difficulty speak	Symptoms and Signs	Patient Info.	No Difficulty	No Difficulty	C5238452
difficulty swallowing	difficulty swallowing	difficulty swallow	Symptoms and Signs	Patient Info.	Have Difficulty Swallowing	No Difficulty	C5238452	swallowing	RID39244
difficulty swallowing pills	difficulty swallowing pills	difficulty swallow pill	Symptoms and Signs	Patient Info.	Difficulty swallowing pills	Swallowing G-code	C4281783	swallowing	RID39244
difficulty to ventilate	difficulty to ventilate	difficulty to ventilate	Symptoms and Signs	Patient Info.	No Difficulty	Environmental air flow	C0042491
difficulty ventilating	difficulty ventilating	difficulty ventilate	Symptoms and Signs	Patient Info.	No Difficulty	No Difficulty	C5238452
difficulty venting	difficulty venting	difficulty vent	Symptoms and Signs	Patient Info.	Assisted breathing	Assisted breathing	C0554804
diffuse alveolar hemorrhage	diffuse alveolar hemorrhage	diffuse alveolar hemorrhage	Diseases and Disorders	CF	Diffuse alveolar hemorrhage	Diffuse alveolar hemorrhage	C4476767	diffuse, hemorrhage	RID5701, RID4700
diffuse pulmonary disease	diffuse pulmonary disease	diffuse pulmonary disease	Diseases and Disorders	CF	Diffuse Pulmonary Fibrosis	Diffuse Pulmonary Fibrosis	C0865849	diffuse	RID5701
diffusion	diffusion	diffusion	Diagnostic Observations	LF	Diffusion	Diffusion	C0012222	diffusion	RID10374
aneurysmal dilatation	dilatation	dilation	Diagnostic Observations	LF	Pathological Dilatation	Pathological Dilatation	C0012359
dilatation	dilatation	dilatation	Diagnostic Observations	LF	Pathological Dilatation	Pathological Dilatation	C0012359
dilatation of neoesophagus	dilatation	dilatation	Diagnostic Observations	LF	Pathological Dilatation	Pathological Dilatation	C0012359
dilatation of the hilar and peripheral pulmonary vasculature	dilatation	dilation	Diagnostic Observations	LF	Pathological Dilatation	Pathological Dilatation	C0012359
dilatation of the main pulmonary artery	dilatation	dilation	Diagnostic Observations	LF	Pathological Dilatation	Pathological Dilatation	C0012359
dilatation of the trachea	dilatation	dilation	Diagnostic Observations	LF	Pathological Dilatation	Pathological Dilatation	C0012359	dilation	RID4743
esophageal dilatation	dilatation	dilatation	Diagnostic Observations	LF	Pathological Dilatation	Pathological Dilatation	C0012359	dilation	RID4743
pulmonary artery dilatation	dilatation	dilatation	Diagnostic Observations	LF	Pathological Dilatation	Pathological Dilatation	C0012359	dilation	RID4743
tracheal dilatation	dilatation	dilatation	Diagnostic Observations	LF	Pathological Dilatation	Pathological Dilatation	C0012359	dilation	RID4743
dilated cardiomyopathy	dilated cardiomyopathy	dilate cardiomyopathy	Diseases and Disorders	NCD	cardiovascular disease+pulmonary disease	cardiovascular disease+pulmonary disease	C4072686
aortic dilation	dilation	dilation	Diagnostic Observations	LF	pathological dilatation	pathological dilatation	C0012359	dilation	RID4743
dilation	dilation	dilation	Diagnostic Observations	LF	pathological dilatation	pathological dilatation	C0012359	dilation	RID4743
dilation of anastomosis	dilation	dilatation	Diagnostic Observations	LF	pathological dilatation	pathological dilatation	C0012359	dilation	RID4743
dilation of esophageal stricture	dilation	dilatation	Diagnostic Observations	LF	pathological dilatation	pathological dilatation	C0012359	dilation	RID4743
esophageal dilation	dilation	dilation	Diagnostic Observations	LF	Pathological Dilatation	Pathological Dilatation	C0012359	dilation	RID4743
diminished breath sounds	diminished breath sounds	diminish breath sound	Diagnostic Observations	COF	Abnormal breath sounds	Abnormal breath sounds	C0231856
diminished bs	diminished bs	diminish breath sound	Diagnostic Observations	COF	Bloom Syndrome	Bloom Syndrome	C0005859
discectomy	discectomy	discectomy	Procedures and Surgeries	OTH	Percutaneous discectomy	Percutaneous discectomy	C0206080
discordancy	discordancy	discordancy	Diagnostic Observations	PF	Discordance	Discordance	C3639994
acute intrathoracic disease	disease	disease	Diseases and Disorders	PF	Acute Disease	Acute Disease	C0001314	acute, intrathoracic	RID5718, RID11153
disease progression	disease progression	disease progression	Diagnostic Observations	LF	Disease Progression	Disease Progression	C0242656	disease progression	RID29041
dish	dish	dish	Diseases and Disorders	CF	Cell per Dish	Cell per Dish	C2347576
ac joint dislocation	dislocation	dislocation	Diseases and Disorders	PF	Pathological dislocation of joint	Pathological dislocation of joint	C0158090	acromioclavicular joint, dislocation	RID1895, RID4770
dislocation	dislocation	dislocation	Diseases and Disorders	PF	Lens dislocation	Lens dislocation	C0023309	dislocation	RID4770
displaced sternal wire fragment	displaced sternal wire fragment	sternal wire fragment	Medical Devices	OTH	wire device	wire device	C4522306	wire	RID5453
displaced wire fragment	displaced wire fragment	wire fragment	Medical Devices	OTH	wire device	wire device	C4522306	wire	RID5453
displacement	displacement	displacement	Diagnostic Observations	LF	qualitative displacement	qualitative displacement	C0456080	displacement	RID4751
displacement of the trachea	displacement	displacement	Diagnostic Observations	LF	qualitative displacement	qualitative displacement	C0456080	displacement	RID4751
downward displacement	displacement	displacement	Diagnostic Observations	LF	qualitative displacement	qualitative displacement	C0456080	displacement	RID4751
tracheal displacement	displacement	displacement	Diagnostic Observations	LF	qualitative displacement	qualitative displacement	C0456080	displacement	RID4751
disruption	disruption	disruption	Diagnostic Observations	LF	Column (anatomic)	Column (anatomic)	C1185738
disruption in the air column	disruption	disruption	Diagnostic Observations	LF	Bronchial	Bronchial	C0205039
disruption of the right bronchial air column	disruption	disruption	Diagnostic Observations	LF
disseminated malignancy	disseminated malignancy	disseminate malignancy	Diseases and Disorders	NCD	Disseminated	Disseminated	C0205221
dilated distal esophagus	distal esophagus	distal esophagus	Anatomical Entities	LF	Esophagus	Esophagus	C0014876	esophagus	RID95
distal lead tip	distal lead tip	distal lead tip	Medical Devices	OTH	device tip (physical object)	device tip (physical object)	C3872494
distended abdomen	distended abdomen	distended abdomen	Symptoms and Signs	Patient Info.	Abdomen	Abdomen	C0000726	distended, abdomen	RID5787, RID56
azygos distension	distension	distension	Diagnostic Observations	LF	Distention	Distention	C3714614	distension	RID3793
distension	distension	distension	Diagnostic Observations	LF	Distention	Distention	C3714614	distension	RID3793
distension vasculature	distension	distension	Diagnostic Observations	LF	Distention	Distention	C3714614	distension	RID3793
gastric distension	distension	distension	Diagnostic Observations	LF	Distention	Distention	C3714614	distension	RID3793
mediastinal venous distension	distension	distension	Diagnostic Observations	LF	Distention	Distention	C3714614	distension	RID3793
azygous distention	distention	distention	Diagnostic Observations	LF	Distention	Distention	C3714614	distension	RID3793
distention	distention	distention	Diagnostic Observations	LF	Distention	Distention	C3714614	distension	RID3793
distention of mediastinal veins	distention	distention	Diagnostic Observations	LF	Distention	Distention	C3714614	distension	RID3793
distention of the azygos	distention	distention	Diagnostic Observations	LF	Distention	Distention	C3714614	distension	RID3793
distention of the azygos vein	distention	distention	Diagnostic Observations	LF	Distention	Distention	C3714614	distension	RID3793
distention of the azygous vein	distention	distention	Diagnostic Observations	LF	Distention	Distention	C3714614	distension	RID3793
distention of the neoesophagus	distention	distention	Diagnostic Observations	LF	Distention	Distention	C3714614	distension	RID3793
gastric distention	distention	distention	Diagnostic Observations	LF	Distention	Distention	C3714614	distension	RID3793
stomach distention	distention	distention	Diagnostic Observations	LF	Distention	Distention	C3714614	distension	RID3793
distortion	distortion	distortion	Diagnostic Observations	LF	Distention	Distention	C3714614	distension	RID3793
distortion of vascular and airway structures	distortion	distortion	Diagnostic Observations	LF	Distention	Distention	C3714614	distension	RID3793
parenchymal distortion	distortion	distortion	Diagnostic Observations	LF	Distention	Distention	C3714614	distension	RID3793
disturbed lymphatic drainage	disturbed lymphatic drainage	disturbed lymphatic drainage	Diseases and Disorders	CF	Manual Lymphatic Drainage	Manual Lymphatic Drainage	C0556834	drainage	RID10417
diuresing	diuresing	diuresis	Treatment and Medications	Patient Info.	Diuresis	Diuresis	C0012797
diuresis	diuresis	diuresis	Treatment and Medications	Patient Info.	Diuresis	Diuresis	C0012797
diverticulitis	diverticulitis	diverticulitis	Diseases and Disorders	NCD	Diverticulitis	Diverticulitis	C0012813	diverticulitis	RID3409
diverticulosis	diverticulosis	diverticulosis	Diseases and Disorders	NCD	Diverticulosis	Diverticulosis	C1510475
diverticulum	diverticulum	diverticulum	Diseases and Disorders	CF	Diverticulum	Diverticulum	C0012817	diverticulum	RID4817
dizziness	dizziness	dizziness	Symptoms and Signs	Patient Info.	Dizziness	Dizziness	C0012833	dizziness	RID39219
humeral djd	djd	degenerative joint disease	Diseases and Disorders	PF	Degenerative polyarthritis	Degenerative polyarthritis	C0029408
dka	dka	Diabetic ketoacidosis	Diseases and Disorders	NCD	Diabetic Ketoacidosis	Diabetic Ketoacidosis	C0011880
dm	dm	Diabetes Mellitus	Diseases and Disorders	NCD	dexamethasone	dexamethasone	C0011777
dm1	dm1	dm1	Diseases and Disorders	NCD	DMPK gene	DMPK gene	C1414085
dm2	dm2	Diabetes Mellitus 2	Diseases and Disorders	NCD	square decimeter	square decimeter	C1300562
dmi	dmi	Diabetic muscle infarction	Diseases and Disorders	NCD	desipramine	desipramine	C0011685
dob off tube placement	dob off tube	dobhoff tube	Medical Devices	OTH	tube	tube	C1561954	Dobbhoff tube	RID5569
dobbhoff	dobbhoff	dobhoff	Medical Devices	OTH
dobbhoff dislodgement	dobbhoff	dobhoff	Medical Devices	OTH
dobbhoff placement	dobbhoff	dobhoff	Medical Devices	OTH
dobbhoff placement assessment	dobbhoff	dobhoff	Medical Devices	OTH
dobbhoff catheter	dobbhoff catheter	dobhoff catheter	Medical Devices	OTH	catheter device	catheter device	C0085590	catheter	RID5576
dobbhoff feeding tube	dobbhoff feeding tube	dobhoff feeding tube	Medical Devices	OTH	Feeding tube	Feeding tube	C2945625	feeding tube	RID5561
dobbhoff tip	dobbhoff tip	dobhoff tube tip	Medical Devices	OTH	device tip (physical object)	device tip (physical object)	C3872494
dobbhoff tip position	dobbhoff tip	dobhoff tube tip	Medical Devices	OTH	device tip (physical object)	device tip (physical object)	C3872494
dobbhoff tube	dobbhoff tube	dobhoff tube	Medical Devices	OTH	tube	tube	C1561954	Dobbhoff tube	RID5569
dobbhoff tube placement	dobbhoff tube	dobhoff tube	Medical Devices	OTH	tube	tube	C1561954	Dobbhoff tube	RID5569
dobbhoff tube position	dobbhoff tube	dobhoff tube	Medical Devices	OTH	tube	tube	C1561954	Dobbhoff tube	RID5569
dobbhoff tube tip	dobbhoff tube tip	dobhoff tube tip	Medical Devices	OTH	device tip (physical object)	device tip (physical object)	C3872494
dobbhoff-type catheter	dobbhoff-type catheter	dobhoff catheter	Medical Devices	OTH	catheter device	catheter device	C0085590	catheter	RID5576
dobbhoff-type tube	dobbhoff-type tube	dobhoff tube tip	Medical Devices	OTH	tube	tube	C1561954	Dobbhoff tube	RID5569
dobhoff	dobhoff	dobhoff	Medical Devices	OTH
dobhoff advancement	dobhoff	dobhoff	Medical Devices	OTH
dobhoff placement	dobhoff	dobhoff	Medical Devices	OTH
dobhoff placement assessment	dobhoff	dobhoff	Medical Devices	OTH
dobhoff catheter	dobhoff catheter	dobhoff catheter	Medical Devices	OTH	catheter device	catheter device	C0085590	catheter	RID5576
dobhoff feeding tube	dobhoff feeding tube	dobhoff feeding tube	Medical Devices	OTH	Feeding tube	Feeding tube	C2945625	feeding tube	RID5561
dobhoff tip	dobhoff tip	dobhoff tube tip	Medical Devices	OTH	device tip (physical object)	device tip (physical object)	C3872494
dobhoff tip position	dobhoff tip	dobhoff tube tip	Medical Devices	OTH	device tip (physical object)	device tip (physical object)	C3872494
dobhoff tube	dobhoff tube	dobhoff tube	Medical Devices	OTH	tube	tube	C1561954	Dobbhoff tube	RID5569
dobhoff tube placement	dobhoff tube	dobhoff tube	Medical Devices	OTH	tube	tube	C1561954	Dobbhoff tube	RID5569
dobhoff tube position	dobhoff tube	dobhoff tube	Medical Devices	OTH	tube	tube	C1561954	Dobbhoff tube	RID5569
dobhoff tube tip	dobhoff tube tip	dobhoff tube tip	Medical Devices	OTH	device tip (physical object)	device tip (physical object)	C3872494
dobhoff-type catheter	dobhoff-type catheter	dobhoff catheter	Medical Devices	OTH	catheter device	catheter device	C0085590	catheter	RID5576
dobhoff-type tube	dobhoff-type tube	dobhoff tube	Medical Devices	OTH	tube	tube	C1561954	Dobbhoff tube	RID5569
dobhoff-type tube tip	dobhoff-type tube tip	dobhoff tube tip	Medical Devices	OTH	device tip (physical object)	device tip (physical object)	C3872494
doe	doe	dyspnea on exertion	Symptoms and Signs	Patient Info.	Dyspnea on exertion	Dyspnea on exertion	C0231807
dofetilide	dofetilide	dofetilide	Treatment and Medications	OTH	dofetilide	dofetilide	C0114771
double-lumen catheter	double-lumen catheter	double-lumen catheter	Medical Devices	OTH	catheter device	catheter device	C0085590	catheter	RID5576
double-lumen central line	double-lumen central line	double-lumen central line	Medical Devices	OTH	lead line	lead line	C0544864
double-lumen central venous catheter	double-lumen central venous catheter	double-lumen central venous catheter	Medical Devices	OTH	catheter device	catheter device	C0085590	catheter	RID5576
double-lumen dialysis catheter	double-lumen dialysis catheter	double-lumen dialysis catheter	Medical Devices	OTH	catheter device	catheter device	C0085590	catheter	RID5576
double-lumen left-sided dialysis catheter	double-lumen left-sided dialysis catheter	double-lumen left-sided dialysis catheter	Medical Devices	OTH	catheter device	catheter device	C0085590	catheter	RID5576
double-lumen right internal jugular catheter	double-lumen right internal jugular catheter	double-lumen right internal jugular catheter	Medical Devices	OTH	catheterization of internal jugular vein	catheterization of internal jugular vein	C1319105	right, internal jugular vein, catheter	RID5825, RID1024, RID5576
double-lumen right internal jugular large-bore catheter	double-lumen right internal jugular large-bore catheter	double-lumen right internal jugular large-bore catheter	Medical Devices	OTH	catheterization of internal jugular vein	catheterization of internal jugular vein	C1319105	right, internal jugular vein, catheter	RID5825, RID1024, RID5576
drain	drain	drain	Procedures and Surgeries	OTH	Drain device	Drain device	C0180499	surgical drain	RID5610
drain placement	drain	drain	Procedures and Surgeries	OTH
drain tubes	drain tubes	drain tube	Medical Devices	OTH	Tube drain	Tube drain	C0184114	drainage, tube	RID10417, RID5555
drainage	drainage	drainage	Procedures and Surgeries	OTH	Drainage procedure	Drainage procedure	C0013103	drainage	RID10417
drainage catheter	drainage catheter	drainage catheter	Medical Devices	OTH	drainage catheter	Drainage biliary catheter	C0878869	drainage catheter	RID5579
drainage tubes	drainage tubes	drainage tube	Medical Devices	OTH	Tube drain	Tube drain	C0184114	drainage, tube	RID10417, RID5555
draining catheter	draining catheter	drain catheter	Medical Devices	OTH	catheter device	catheter device	C0085590	catheter	RID5576
drains	drains	drain	Procedures and Surgeries	OTH	surgical drain	Drain device	C0180499	surgical drain	RID5610
drug-induced pneumonitis	drug-induced pneumonitis	drug-induced pneumonitis	Diseases and Disorders	CF	Drug-induced pneumonitis	Drug-induced pneumonitis	C1960026
dry cough	dry cough	cough	Symptoms and Signs	Patient Info.	Coughing	Coughing	C0010200	cough	RID39051
dry coughing	dry coughing	dry cough	Symptoms and Signs	Patient Info.	Coughing	Coughing	C0010200	cough	RID39051
dual chamber ppm	dual chamber ppm	dual chamber permanent pacemaker	Medical Devices	OTH	Parts per million (qualifier value)	Parts per million (qualifier value)	C0439187
dual channel catheter	dual channel catheter	dual channel catheter	Medical Devices	OTH	catheter device	catheter device	C0085590	catheter	RID5576
dual lead left-sided pacemaker	dual lead left-sided pacemaker	dual lead left-sided pacemaker	Medical Devices	OTH	Dual Chamber Pacemaker	Dual Chamber Pacemaker	C2911683	pacemaker	RID5436
dual lead pacemaker	dual lead pacemaker	dual lead pacemaker	Medical Devices	OTH	pacemakers	pacemakers	C0810633	pacemaker	RID5436
dual lead pacemaker/icd device	dual lead pacemaker/icd device	dual lead pacemaker/icd device	Medical Devices	OTH	pacemakers	pacemakers	C0810633	pacemaker	RID5436
dual lead pacing device	dual lead pacing device	dual lead pacing device	Medical Devices	OTH	pacemakers	pacemakers	C0810633	pacemaker	RID5436
dual lumen catheter tip	dual lumen catheter tip	dual lumen catheter tip	Medical Devices	OTH	device tip (physical object)	device tip (physical object)	C3872494
dual lumen central venous catheter	dual lumen central venous catheter	dual lumen central venous catheter	Medical Devices	OTH	Central venous catheter, device	Central venous catheter, device	C1145640	central venous catheter	RID5578
dual lumen dialysis catheter tip	dual lumen dialysis catheter tip	dual lumen dialysis catheter tip	Medical Devices	OTH	device tip (physical object)	device tip (physical object)	C3872494
dual lumen right-sided central venous catheter	dual lumen right-sided central venous catheter	dual lumen right-sided central venous catheter	Medical Devices	OTH	Central venous catheter, device	Central venous catheter, device	C1145640	central venous catheter	RID5578
dual-chamber dialysis catheter	dual-chamber dialysis catheter	dual-chamber dialysis catheter	Medical Devices	OTH	catheter device	catheter device	C0085590	catheter	RID5576
dual-chamber dialysis catheter tip	dual-chamber dialysis catheter tip	dual-chamber dialysis catheter tip	Medical Devices	OTH	device tip (physical object)	device tip (physical object)	C3872494
dual-chamber pacemaker	dual-chamber pacemaker	dual-chamber pacemaker	Medical Devices	OTH	pacemakers	pacemakers	C0810633	pacemaker	RID5436
dual-chamber pacemaker placement	dual-chamber pacemaker	dual-chamber pacemaker	Medical Devices	OTH	Dual Chamber Pacemaker	Dual Chamber Pacemaker	C2911683	pacemaker	RID5436
dual-chamber pacemaker device	dual-chamber pacemaker device	dual-chamber pacemaker device	Medical Devices	OTH	pacemakers	pacemakers	C0810633	pacemaker	RID5436
dual-chamber pacer	dual-chamber pacer	dual-chamber pacer	Medical Devices	OTH	Dual Chamber Pacemaker	Dual Chamber Pacemaker	C2911683	pacemaker	RID5436
dual-chamber transvenous pacemaker leads	dual-chamber transvenous pacemaker leads	dual-chamber transvenous pacemaker lead	Medical Devices	OTH	Dual Chamber Pacemaker	Dual Chamber Pacemaker	C2911683	pacemaker	RID5436
dual-channel catheter	dual-channel catheter	dual-channel catheter	Medical Devices	OTH	catheter device	catheter device	C0085590	catheter	RID5576
dual-channel dialysis catheter	dual-channel dialysis catheter	dual-channel dialysis catheter	Medical Devices	OTH	catheter device	catheter device	C0085590	catheter	RID5576
dual-channel dialysis catheters	dual-channel dialysis catheters	dual-channel dialysis catheter	Medical Devices	OTH	catheter device	catheter device	C0085590	catheter	RID5576
dual-channel dialysis line	dual-channel dialysis line	dual-channel dialysis line	Medical Devices	OTH	lead line	lead line	C0544864
dual-channel left supraclavicular central venous line	dual-channel left supraclavicular central venous line	dual-channel left supraclavicular central venous line	Medical Devices	OTH	lead line	lead line	C0544864
dual-channel pacemaker device	dual-channel pacemaker device	dual-channel pacemaker device	Medical Devices	OTH	pacemakers	pacemakers	C0810633	pacemaker	RID5436
dual-channel pacer	dual-channel pacer	dual-channel pacer	Medical Devices	OTH	pacemakers	pacemakers	C0810633	pacemaker	RID5436
dual-channel pacer device	dual-channel pacer device	dual-channel pacer device	Medical Devices	OTH	pacemakers	pacemakers	C0810633	pacemaker	RID5436
dual-channel right supraclavicular dialysis catheter	dual-channel right supraclavicular dialysis catheter	dual-channel right supraclavicular dialysis catheter	Medical Devices	OTH	catheter device	catheter device	C0085590	catheter	RID5576
dual-channel right supraclavicular dialysis set	dual-channel right supraclavicular dialysis set	dual-channel right supraclavicular dialysis set	Medical Devices	OTH	Supraclavicular approach	Supraclavicular approach	C0589496
dual-lead left pectoral pacemaker device	dual-lead left pectoral pacemaker device	dual-lead left pectoral pacemaker device	Medical Devices	OTH	pacemakers	pacemakers	C0810633	pacemaker	RID5436
dual-lead left-sided pacemaker	dual-lead left-sided pacemaker	dual-lead left-sided pacemaker	Medical Devices	OTH	pacemakers	pacemakers	C0810633	pacemaker	RID5436
dual-lead left-sided pacer device	dual-lead left-sided pacer device	dual-lead left-sided pacer device	Medical Devices	OTH	pacemakers	pacemakers	C0810633	pacemaker	RID5436
dual-lead pacemaker	dual-lead pacemaker	dual-lead pacemaker	Medical Devices	OTH	pacemakers	pacemakers	C0810633	pacemaker	RID5436
dual-lead pacemaker/icd	dual-lead pacemaker/icd	dual-lead pacemaker/icd	Medical Devices	OTH	pacemakers	pacemakers	C0810633	pacemaker	RID5436
dual-lead pacemaker/icd device	dual-lead pacemaker/icd device	dual-lead pacemaker/icd device	Medical Devices	OTH	pacemakers	pacemakers	C0810633	pacemaker	RID5436
dual-lead pacer	dual-lead pacer	dual-lead pacer	Medical Devices	OTH	pacemakers	pacemakers	C0810633	pacemaker	RID5436
dual-lead pacer/aicd	dual-lead pacer/aicd	dual-lead pacer/aicd	Medical Devices	OTH	Leads (device)	Leads (device)	C0181586	lead	RID11924
dual-lead pacing device	dual-lead pacing device	dual-lead pace device	Medical Devices	OTH	pacemakers	pacemakers	C0810633	pacemaker	RID5436
dual-lumen catheter	dual-lumen catheter	dual-lumen catheter	Medical Devices	OTH	catheter device	catheter device	C0085590	catheter	RID5576
dual-lumen dialysis catheter	dual-lumen dialysis catheter	dual-lumen dialysis catheter	Medical Devices	OTH	catheter device	catheter device	C0085590	catheter	RID5576
dual-lumen dialysis catheter tip	dual-lumen dialysis catheter tip	dual-lumen dialysis catheter tip	Medical Devices	OTH	device tip (physical object)	device tip (physical object)	C3872494
dual-lumen hemodialysis catheter	dual-lumen hemodialysis catheter	dual-lumen hemodialysis catheter	Medical Devices	OTH	catheter device	catheter device	C0085590	catheter	RID5576
dual-lumen left subclavian line	dual-lumen left subclavian line	dual-lumen left subclavian line	Medical Devices	OTH	lead line	lead line	C0544864
dual-lumen right ij catheter	dual-lumen right ij catheter	right ij catheter	Medical Devices	OTH	catheterization of internal jugular vein	catheterization of internal jugular vein	C1319105	right, internal jugular vein, catheter	RID5825, RID1024, RID5576
dual-lumen right internal jugular catheter	dual-lumen right internal jugular catheter	dual-lumen right internal jugular catheter	Medical Devices	OTH	catheterization of internal jugular vein	catheterization of internal jugular vein	C1319105	right, internal jugular vein, catheter	RID5825, RID1024, RID5576
dual-valve replacements	dual-valve replacements	dual-valve replacements	Procedures and Surgeries	OTH	Valve Replacement	Valve Replacement	C5239551
duff tube	duff tube	tube	Medical Devices	OTH	tube	tube	C1561954	Dobbhoff tube	RID5569
duff tube placement	duff tube	tube	Medical Devices	OTH	tube	tube	C1561954	Dobbhoff tube	RID5569
dullness	dullness	dullness	Symptoms and Signs	Patient Info.	Dullness	Dullness	C0541911
duodenal ulcer bleed	duodenal ulcer bleed	duodenal ulcer bleed	Diseases and Disorders	Patient Info.	Duodenal Ulcer	Hemorrhage	C0019080
dvt	dvt	dvt	Diseases and Disorders	COF	Deep Vein Thrombosis	Deep Vein Thrombosis	C0149871
dvt/pe	dvt/pe	deep vein thrombosis / pulmonary embolism	Diseases and Disorders	NCD	Deep Vein Thrombosis	Deep Vein Thrombosis	C0149871
dvts	dvts	deep vein thrombosis	Diseases and Disorders	NCD	Deep thrombophlebitis	Deep thrombophlebitis	C0151950
dysequilibrium	dysequilibrium	dysequilibrium	Symptoms and Signs	Patient Info.	Dysequilibrium	Dysequilibrium	C0281825
dysphagia	dysphagia	dysphagia	Symptoms and Signs	Patient Info.	deglutition disorders	deglutition disorders	C0011168	dysphagia	RID5266
dyspnea	dyspnea	dyspnea	Symptoms and Signs	Patient Info.	Dyspnea	Dyspnea	C0013404
dyspnea on exertion	dyspnea on exertion	dyspnea on exertion	Symptoms and Signs	Patient Info.	Exertion	Exertion	C0015264
dysuria	dysuria	dysuria	Symptoms and Signs	Patient Info.	Dysuria	Dysuria	C0013428
early aspiration	early aspiration	early aspiration	Symptoms and Signs	Patient Info.	Pulmonary aspiration	Pulmonary aspiration	C0700198
eating	eating	eating	Symptoms and Signs	Patient Info.	Eating	Eating	C0013470
ebus	ebus	ebus	Procedures and Surgeries	OTH	Endobronchial Ultrasound Bronchoscopy	Endobronchial Ultrasound Bronchoscopy	C3160856
ecg leads	ecg leads	EKG lead	Medical Devices	OTH	Leads (device)	Leads (device)	C0181586	lead	RID11924
echocardiogram	echocardiogram	echocardiogram	Procedures and Surgeries	OTH	Echocardiogram Table	Echocardiogram Table	C5239228
echocardiography	echocardiography	echocardiography	Procedures and Surgeries	OTH	Echocardiography	Echocardiography	C0013516	echocardiography	RID39220
asymmetric edema	edema	edema	Diseases and Disorders	CF	Edema	Edema	C0013604	edema	RID4865
asymmetrical edema	edema	edema	Diseases and Disorders	CF	Edema	Edema	C0013604	edema	RID4865
central edema	edema	edema	Diseases and Disorders	CF	Edema	Edema	C0013604	edema	RID4865
cephalization edema	edema	edema	Diseases and Disorders	CF	Edema	Edema	C0013604	edema	RID4865
early edema	edema	edema	Diseases and Disorders	CF	Edema	Edema	C0013604	edema	RID4865
edema	edema	edema	Diseases and Disorders	CF	Edema	Edema	C0013604	edema	RID4865
focal edema	edema	edema	Diseases and Disorders	CF	Edema	Edema	C0013604	edema	RID4865
lower extremity edema	edema	edema	Diseases and Disorders	CF	Edema	Edema	C0013604	edema	RID4865
residual asymmetrical edema	edema	edema	Diseases and Disorders	CF	Edema	Edema	C0013604	edema	RID4865
upper respiratory airway edema	edema	edema	Diseases and Disorders	CF	Edema	Edema	C0013604	edema	RID4865
edema pattern	edema pattern	edema pattern	Diseases and Disorders	PF	Edema	Edema	C0013604	edema	RID4865
edematous	edematous	edematous	Diseases and Disorders	PF	Edema	Edema	C0013604	edema	RID4865
edematous change	edematous change	edematous change	Diseases and Disorders	CF	Change -- procedure	Change -- procedure	C4319952	change	RID49896
ef	ef	ejection fraction	Diagnostic Observations	COF
effacement	effacement	effacement	Diagnostic Observations	LF
effacement of the aortopulmonic window	effacement	effacement	Diagnostic Observations	LF
effacement of the right heart border	effacement	effacement	Diagnostic Observations	LF
effusion	effusion	effusion	Diseases and Disorders	PF	effusion	effusion	C0013687	effusion	RID4872
encapsulated pleural effusion	effusion	effusion	Diseases and Disorders	PF	effusion	effusion	C0013687	effusion	RID4872
extensive right pleural effusion	effusion	effusion	Diseases and Disorders	PF	effusion	effusion	C0013687	effusion	RID4872
fissural effusion	effusion	effusion	Diseases and Disorders	PF	effusion	effusion	C0013687	effusion	RID4872
gross effusion	effusion	effusion	Diseases and Disorders	PF	effusion	effusion	C0013687	effusion	RID4872
large effusion	effusion	effusion	Diseases and Disorders	PF	effusion	effusion	C0013687	effusion	RID4872
large pleural effusion	effusion	effusion	Diseases and Disorders	PF	effusion	effusion	C0013687	effusion	RID4872
layering effusion	effusion	effusion	Diseases and Disorders	PF	effusion	effusion	C0013687	effusion	RID4872
layering pleural effusion	effusion	effusion	Diseases and Disorders	PF	effusion	effusion	C0013687	effusion	RID4872
left effusion	effusion	effusion	Diseases and Disorders	PF	effusion	effusion	C0013687	effusion	RID4872
left pleural effusion	effusion	effusion	Diseases and Disorders	PF	effusion	effusion	C0013687	effusion	RID4872
left-sided effusion	effusion	effusion	Diseases and Disorders	PF	effusion	effusion	C0013687	effusion	RID4872
left-sided pleural effusion	effusion	effusion	Diseases and Disorders	PF	effusion	effusion	C0013687	effusion	RID4872
loculated effusion	effusion	effusion	Diseases and Disorders	PF	effusion	effusion	C0013687	effusion	RID4872
loculated fissural effusion	effusion	effusion	Diseases and Disorders	PF	effusion	effusion	C0013687	effusion	RID4872
loculated left pleural effusion	effusion	effusion	Diseases and Disorders	PF	effusion	effusion	C0013687	effusion	RID4872
loculated pleural effusion	effusion	effusion	Diseases and Disorders	PF	effusion	effusion	C0013687	effusion	RID4872
loculated right lower lobe effusion	effusion	effusion	Diseases and Disorders	PF	effusion	effusion	C0013687	effusion	RID4872
loculated right pleural effusion	effusion	effusion	Diseases and Disorders	PF	effusion	effusion	C0013687	effusion	RID4872
pericardial effusion	effusion	effusion	Diseases and Disorders	PF	effusion	effusion	C0013687	effusion	RID4872
pleural effusion	effusion	effusion	Diseases and Disorders	PF	effusion	effusion	C0013687	effusion	RID4872
pulmonary effusion	effusion	effusion	Diseases and Disorders	PF	effusion	effusion	C0013687	effusion	RID4872
right effusion	effusion	effusion	Diseases and Disorders	PF	effusion	effusion	C0013687	effusion	RID4872
right lower lobe effusion	effusion	effusion	Diseases and Disorders	PF	effusion	effusion	C0013687	effusion	RID4872
right pleural effusion	effusion	effusion	Diseases and Disorders	PF	effusion	effusion	C0013687	effusion	RID4872
right-sided effusion	effusion	effusion	Diseases and Disorders	PF	effusion	effusion	C0013687	effusion	RID4872
right-sided pleural effusion	effusion	effusion	Diseases and Disorders	PF	effusion	effusion	C0013687	effusion	RID4872
small effusion	effusion	effusion	Diseases and Disorders	PF	effusion	effusion	C0013687	effusion	RID4872
small left pleural effusion	effusion	effusion	Diseases and Disorders	PF	effusion	effusion	C0013687	effusion	RID4872
small pleural effusion	effusion	effusion	Diseases and Disorders	PF	effusion	effusion	C0013687	effusion	RID4872
subpulmonic effusion	effusion	effusion	Diseases and Disorders	PF	effusion	effusion	C0013687	effusion	RID4872
subpulmonic pleural effusion	effusion	effusion	Diseases and Disorders	PF	effusion	effusion	C0013687	effusion	RID4872
subpulmonic right pleural effusion	effusion	effusion	Diseases and Disorders	PF	effusion	effusion	C0013687	effusion	RID4872
trace effusion	effusion	effusion	Diseases and Disorders	PF	effusion	effusion	C0013687	effusion	RID4872
effusion atelectasis	effusion atelectasis	effusion atelectasis	Diseases and Disorders	PF	Atelectasis	Atelectasis	C0004144	atelectasis	RID28493
bilateral effusions	effusions	effusion	Diseases and Disorders	PF	effusion	effusion	C0013687	effusion	RID4872
bilateral pleural effusions	effusions	effusion	Diseases and Disorders	PF	effusion	effusion	C0013687	effusion	RID4872
effusions	effusions	effusion	Diseases and Disorders	PF	effusion	effusion	C0013687	effusion	RID4872
joint effusions	effusions	effusion	Diseases and Disorders	PF	effusion	effusion	C0013687	effusion	RID4872
large effusions	effusions	effusion	Diseases and Disorders	PF	effusion	effusion	C0013687	effusion	RID4872
large pleural effusions	effusions	effusion	Diseases and Disorders	PF	effusion	effusion	C0013687	effusion	RID4872
layering effusions	effusions	effusion	Diseases and Disorders	PF	effusion	effusion	C0013687	effusion	RID4872
loculated effusions	effusions	effusion	Diseases and Disorders	PF	effusion	effusion	C0013687	effusion	RID4872
loculated pleural effusions	effusions	effusion	Diseases and Disorders	PF	effusion	effusion	C0013687	effusion	RID4872
lung effusions	effusions	effusion	Diseases and Disorders	PF	effusion	effusion	C0013687	effusion	RID4872
pleural effusions	effusions	effusion	Diseases and Disorders	PF	effusion	effusion	C0013687	effusion	RID4872
small effusions	effusions	effusion	Diseases and Disorders	PF	effusion	effusion	C0013687	effusion	RID4872
small pleural effusions	effusions	effusion	Diseases and Disorders	PF	effusion	effusion	C0013687	effusion	RID4872
trace effusions	effusions	effusion	Diseases and Disorders	PF	effusion	effusion	C0013687	effusion	RID4872
trace pleural effusions	effusions	effusion	Diseases and Disorders	PF	effusion	effusion	C0013687	effusion	RID4872
egd	egd	Esophagogastroduodenoscopy	Procedures and Surgeries	OTH	Esophagogastroduodenoscopy	Esophagogastroduodenoscopy	C0079304
egd and biopsy	egd and biopsy	egd and biopsy	Procedures and Surgeries	OTH	Biopsy	Biopsy	C0005558
egd with dilatation	egd with dilatation	egd with dilatation	Procedures and Surgeries	OTH	Pathological Dilatation	Pathological Dilatation	C0012359
ejection fraction	ejection fraction	ejection fraction	Diagnostic Observations	COF	Fracture	Fracture	C0016658	fracture	RID4650
ekg	ekg	EKG	Procedures and Surgeries	OTH	Electrocardiogram	Electrocardiogram	C0013798
ekg changes	ekg changes	EKG change	Medical Devices	OTH	Change -- procedure	Change -- procedure	C4319952	change	RID49896
ekg lead	ekg lead	EKG lead	Medical Devices	OTH	Leads (device)	Leads (device)	C0181586	lead	RID11924
ekg leads	ekg leads	EKG lead	Medical Devices	OTH	Leads (device)	Leads (device)	C0181586	lead	RID11924
electrode termination	electrode termination	electrode termination	Medical Devices	OTH	electrode	electrode	C0013812
electrolyte imbalance	electrolyte imbalance	electrolyte imbalance	Diseases and Disorders	COF	Imbalance	Imbalance	C1397014
elevated white count	elevated white count	elevate white count	Diagnostic Observations	COF	white, count	Elevated	C3163633	white, count	RID39151, RID28492
diaphragm elevation	elevation	elevation	Diagnostic Observations	LF	Elevation	Elevation	C0702240
diaphragmatic elevation	elevation	elevation	Diagnostic Observations	LF	Elevation	Elevation	C0702240
elevation	elevation	elevation	Diagnostic Observations	LF	Elevation	Elevation	C0702240
elevation of bilateral hemidiaphragms	elevation	elevation	Diagnostic Observations	LF	Elevation	Elevation	C0702240
elevation of left hemidiaphragm	elevation	elevation	Diagnostic Observations	LF	Elevation	Elevation	C0702240
elevation of right hemidiaphragm	elevation	elevation	Diagnostic Observations	LF	Elevation	Elevation	C0702240
elevation of the hemidiaphragm	elevation	elevation	Diagnostic Observations	LF	Elevation	Elevation	C0702240
elevation of the hemidiaphragms	elevation	elevation	Diagnostic Observations	LF	Elevation	Elevation	C0702240
elevation of the left hemidiaphragm	elevation	elevation	Diagnostic Observations	LF	Elevation	Elevation	C0702240
elevation of the left-sided hemidiaphragm	elevation	elevation	Diagnostic Observations	LF	Elevation	Elevation	C0702240
elevation of the right diaphragm	elevation	elevation	Diagnostic Observations	LF	Elevation	Elevation	C0702240
elevation of the right hemidiaphragm	elevation	elevation	Diagnostic Observations	LF	Elevation	Elevation	C0702240
elevation of the right hemidiaphragmatic contour	elevation	elevation	Diagnostic Observations	LF	Elevation	Elevation	C0702240
elevation of the right hilum	elevation	elevation	Diagnostic Observations	LF	Elevation	Elevation	C0702240
elevation of the right hilus	elevation	elevation	Diagnostic Observations	LF	Elevation	Elevation	C0702240
elevation of the right lung base	elevation	elevation	Diagnostic Observations	LF	Elevation	Elevation	C0702240
elevation right hemidiaphragm	elevation	elevation	Diagnostic Observations	LF	Elevation	Elevation	C0702240
hemidiaphragm elevation	elevation	elevation	Diagnostic Observations	LF	Elevation	Elevation	C0702240
left hemidiaphragm elevation	elevation	elevation	Diagnostic Observations	LF	Elevation	Elevation	C0702240
left hemidiaphragmatic elevation	elevation	elevation	Diagnostic Observations	LF	Elevation	Elevation	C0702240
right hemidiaphragm elevation	elevation	elevation	Diagnostic Observations	LF	Elevation	Elevation	C0702240
elongation	elongation	elongation	Diagnostic Observations	LF	Descending aorta	Descending aorta	C0011666	descending aorta	RID481
elongation of the descending aorta	elongation	elongation	Diagnostic Observations	LF
embolic coiling material	embolic coiling material	embolic coil material	Medical Devices	OTH	Embolic Agent	Embolic Agent	C3273291
emesis	emesis	emesis	Symptoms and Signs	Patient Info.	Emesis (Eukaryote)	Emesis (Eukaryote)	C1060009
emphysema	emphysema	emphysema	Diseases and Disorders	PF	Pulmonary Emphysema	Pulmonary Emphysema	C0034067	emphysema	RID4799
emphysematous change	emphysematous change	emphysematous change	Diseases and Disorders	CF	Change -- procedure	Change -- procedure	C4319952	change	RID49896
emphysematous changes	emphysematous changes	emphysematous change	Diseases and Disorders	CF	Change -- procedure	Change -- procedure	C4319952	change	RID49896
empyema	empyema	empyema	Diseases and Disorders	CF	Empyema	Empyema	C0014009	empyema	RID3714
empyema pneumonia	empyema pneumonia	empyema pneumonia	Diseases and Disorders	CF	Pneumonia	Pneumonia	C0032285	pneumonia	RID5350
en bloc resection	en bloc resection	en bloc resection	Procedures and Surgeries	OTH	En Bloc Resection	En Bloc Resection	C4528578
bronchial encasement	encasement	encasement	Diagnostic Observations	CF
encasement	encasement	encasement	Diagnostic Observations	CF
encephalopathy	encephalopathy	encephalopathy	Diseases and Disorders	NCD	Acute encephalopathy	Acute encephalopathy	C1306587
enchondroma	enchondroma	enchondroma	Diseases and Disorders	CF	Enchondroma	Enchondroma	C1704356	enchondroma	RID4128
end ileostomy	end ileostomy	end ileostomy	Procedures and Surgeries	OTH	Ileostomy Site	Ileostomy Site	C4054742
end stage renal disease	end stage renal disease	end stage renal disease	Diseases and Disorders	NCD	chronic kidney disease stage 5	chronic kidney disease stage 5	C2316810
end-stage liver disease	end-stage liver disease	end-stage liver disease	Diseases and Disorders	NCD	end stage liver disease	end stage liver disease	C0745744	liver disorder	RID34712
end-stage renal disease	end-stage renal disease	end-stage renal disease	Diseases and Disorders	NCD	chronic kidney disease stage 5	chronic kidney disease stage 5	C2316810
endocarditis	endocarditis	endocarditis	Diseases and Disorders	NCD	Endocarditis	Endocarditis	C0014118
endogastric tube	endogastric tube	endogastric tube	Medical Devices	OTH	Endotracheal tube	Endotracheal tube	C0336630	endotracheal tube	RID5557
endogastric tube side port	endogastric tube side port	endogastric tube side port	Medical Devices	OTH	Endotracheal tube	Endotracheal tube	C0336630	endotracheal tube	RID5557
endogastric tube tip	endogastric tube tip	endogastric tube tip	Medical Devices	OTH	device tip (physical object)	device tip (physical object)	C3872494
endoscopy	endoscopy	endoscopy	Procedures and Surgeries	OTH	Endoscopy (procedure)	Endoscopy (procedure)	C0014245	endoscopy	RID45710
endotracheal placement	endotracheal	endotracheal	Medical Devices	OTH	endotracheal	endotracheal	C0599554
endotracheal tip	endotracheal tip	endotracheal tube tip	Medical Devices	OTH	device tip (physical object)	device tip (physical object)	C3872494
endotracheal tube	endotracheal tube	endotracheal tube	Medical Devices	OTH	Endotracheal tube	Endotracheal tube	C0336630	endotracheal tube	RID5557
endotracheal tube placement	endotracheal tube	endotracheal tube	Medical Devices	OTH	Endotracheal tube	Endotracheal tube	C0336630	endotracheal tube	RID5557
endotracheal tube position	endotracheal tube	endotracheal tube	Medical Devices	OTH	Endotracheal tube	Endotracheal tube	C0336630	endotracheal tube	RID5557
endotracheal tube positioning	endotracheal tube	endotracheal tube	Medical Devices	OTH	Endotracheal tube	Endotracheal tube	C0336630	endotracheal tube	RID5557
endotracheal tube bleeding	endotracheal tube bleeding	endotracheal tube bleeding	Symptoms and Signs	Patient Info.	Endotracheal tube	Endotracheal tube	C0336630	endotracheal tube	RID5557
endotracheal tube cuff	endotracheal tube cuff	endotracheal tube cuff	Medical Devices	OTH	endotracheal tube cuff	endotracheal tube cuff	C0180212	endotracheal tube	RID5557
endotracheal tube tip	endotracheal tube tip	endotracheal tube tip	Medical Devices	OTH	device tip (physical object)	device tip (physical object)	C3872494
endotracheal tubes	endotracheal tubes	endotracheal tube	Medical Devices	OTH	Endotracheal tube	Endotracheal tube	C0336630	endotracheal tube	RID5557
endotracheal y-stent	endotracheal y-stent	endotracheal y-stent	Medical Devices	OTH	Stent, device	Stent, device	C0038257	stent	RID5598
endotracheal y-stent placement	endotracheal y-stent	endotracheal y-stent	Medical Devices	OTH	Stent, device	Stent, device	C0038257	stent	RID5598
endovascular aortic valve replacement	endovascular aortic valve replacement	endovascular aortic valve replacement	Procedures and Surgeries	OTH	Endovascular replacement of aortic valve	Endovascular replacement of aortic valve	C3161269	aortic valve, device replacement	RID1394, RID49857
endovascular electrodes	endovascular electrodes	endovascular electrode	Medical Devices	OTH	electrode	Endovascular Stenting	C4763881	electrode	RID5456
enema catheter	enema catheter	enema catheter	Medical Devices	OTH	catheter device	catheter device	C0085590	catheter	RID5576
azygos engorgement	engorgement	engorgement	Diseases and Disorders	PF	pulmonary; engorgement	pulmonary; engorgement	C1405833
central pulmonary vascular engorgement	engorgement	engorgement	Diseases and Disorders	PF	pulmonary; engorgement	pulmonary; engorgement	C1405833
central vascular engorgement	engorgement	engorgement	Diseases and Disorders	PF	pulmonary; engorgement	pulmonary; engorgement	C1405833
central venous engorgement	engorgement	engorgement	Diseases and Disorders	PF	pulmonary; engorgement	pulmonary; engorgement	C1405833
engorgement	engorgement	engorgement	Diseases and Disorders	PF	pulmonary; engorgement	pulmonary; engorgement	C1405833
engorgement of azygos vein	engorgement	engorgement	Diagnostic Observations	PF	pulmonary; engorgement	pulmonary; engorgement	C1405833
engorgement of pulmonary vessels	engorgement	engorgement	Diseases and Disorders	PF	pulmonary; engorgement	pulmonary; engorgement	C1405833
engorgement of the central venous vasculature	engorgement	engorgement	Diseases and Disorders	PF	pulmonary; engorgement	pulmonary; engorgement	C1405833
engorgement of the mediastinal vasculature	engorgement	engorgement	Diseases and Disorders	PF	pulmonary; engorgement	pulmonary; engorgement	C1405833
engorgement of the mediastinal veins	engorgement	engorgement	Diseases and Disorders	PF	pulmonary; engorgement	pulmonary; engorgement	C1405833
engorgement of the pulmonary vasculature	engorgement	engorgement	Diseases and Disorders	PF	pulmonary; engorgement	pulmonary; engorgement	C1405833
engorgement of the pulmonary vessels	engorgement	engorgement	Diseases and Disorders	PF	pulmonary; engorgement	pulmonary; engorgement	C1405833
engorgement of the vascular pedicle	engorgement	engorgement	Diseases and Disorders	PF	pulmonary; engorgement	pulmonary; engorgement	C1405833
hilar and pulmonary vascular engorgement	engorgement	engorgement	Diseases and Disorders	PF	pulmonary; engorgement	pulmonary; engorgement	C1405833
hilar engorgement	engorgement	engorgement	Diseases and Disorders	PF	pulmonary; engorgement	pulmonary; engorgement	C1405833
hilar vascular engorgement	engorgement	engorgement	Diseases and Disorders	PF	pulmonary; engorgement	pulmonary; engorgement	C1405833
mediastinal and hilar vascular engorgement	engorgement	engorgement	Diseases and Disorders	PF	pulmonary; engorgement	pulmonary; engorgement	C1405833
mediastinal and pulmonary vascular engorgement	engorgement	engorgement	Diseases and Disorders	PF	pulmonary; engorgement	pulmonary; engorgement	C1405833
mediastinal vascular engorgement	engorgement	engorgement	Diseases and Disorders	PF	pulmonary; engorgement	pulmonary; engorgement	C1405833
mediastinal venous engorgement	engorgement	engorgement	Diseases and Disorders	PF	pulmonary; engorgement	pulmonary; engorgement	C1405833
pulmonary vascular engorgement	engorgement	engorgement	Diseases and Disorders	PF	pulmonary; engorgement	pulmonary; engorgement	C1405833
pulmonary vasculature engorgement	engorgement	engorgement	Diseases and Disorders	PF	pulmonary; engorgement	pulmonary; engorgement	C1405833
pulmonary venous engorgement	engorgement	engorgement	Diseases and Disorders	PF	pulmonary; engorgement	pulmonary; engorgement	C1405833
pulmonary vessel engorgement	engorgement	engorgement	Diseases and Disorders	PF	pulmonary; engorgement	pulmonary; engorgement	C1405833
pulmonary vessels engorgement	engorgement	engorgement	Diseases and Disorders	PF	pulmonary; engorgement	pulmonary; engorgement	C1405833
vascular engorgement	engorgement	engorgement	Diseases and Disorders	PF	pulmonary; engorgement	pulmonary; engorgement	C1405833
venous engorgement	engorgement	engorgement	Diseases and Disorders	PF	pulmonary; engorgement	pulmonary; engorgement	C1405833
vascular engorgements	engorgements	engorgement	Diseases and Disorders	PF	pulmonary; engorgement	pulmonary; engorgement	C1405833
enlarged	enlarged	enlargement	Diagnostic Observations	LF	Enlargement procedure	Enlargement procedure	C1293134	enlargement	RID3775
enlarged cardiomediastinal silhouette	enlarged	enlargement	Diagnostic Observations	LF	Enlargement procedure	Enlargement procedure	C1293134	enlargement	RID3775
cardiac enlargement	enlargement	enlargement	Diagnostic Observations	LF	Enlargement procedure	Enlargement procedure	C1293134	enlargement	RID3775
cardiac silhouette enlargement	enlargement	enlargement	Diagnostic Observations	LF	Enlargement procedure	Enlargement procedure	C1293134	enlargement	RID3775
central lymph node enlargement	enlargement	enlargement	Diagnostic Observations	LF	Enlargement procedure	Enlargement procedure	C1293134	enlargement	RID3775
central vascular enlargement	enlargement	enlargement	Diagnostic Observations	LF	Enlargement procedure	Enlargement procedure	C1293134	enlargement	RID3775
enlargement	enlargement	enlargement	Diagnostic Observations	LF	Enlargement procedure	Enlargement procedure	C1293134	enlargement	RID3775
enlargement of cardiomediastinal silhouette	enlargement	enlargement	Diagnostic Observations	LF	Enlargement procedure	Enlargement procedure	C1293134	enlargement	RID3775
enlargement of central pulmonary arteries	enlargement	enlargement	Diagnostic Observations	LF	Enlargement procedure	Enlargement procedure	C1293134	enlargement	RID3775
enlargement of hila	enlargement	enlargement	Diagnostic Observations	LF	Enlargement procedure	Enlargement procedure	C1293134	enlargement	RID3775
enlargement of the aorta	enlargement	enlargement	Diagnostic Observations	LF	Enlargement procedure	Enlargement procedure	C1293134	enlargement	RID3775
enlargement of the aortic knob	enlargement	enlargement	Diagnostic Observations	LF	Enlargement procedure	Enlargement procedure	C1293134	enlargement	RID3775
enlargement of the azygous vein	enlargement	enlargement	Diagnostic Observations	LF	Enlargement procedure	Enlargement procedure	C1293134	enlargement	RID3775
enlargement of the bilateral hila	enlargement	enlargement	Diagnostic Observations	LF	Enlargement procedure	Enlargement procedure	C1293134	enlargement	RID3775
enlargement of the cardiac silhouette	enlargement	enlargement	Diagnostic Observations	LF	Enlargement procedure	Enlargement procedure	C1293134	enlargement	RID3775
enlargement of the cardiomediastinal contours	enlargement	enlargement	Diagnostic Observations	LF	Enlargement procedure	Enlargement procedure	C1293134	enlargement	RID3775
enlargement of the cardiomediastinal silhouette	enlargement	enlargement	Diagnostic Observations	LF	Enlargement procedure	Enlargement procedure	C1293134	enlargement	RID3775
enlargement of the central pulmonary arteries	enlargement	enlargement	Diagnostic Observations	LF	Enlargement procedure	Enlargement procedure	C1293134	enlargement	RID3775
enlargement of the heart	enlargement	enlargement	Diagnostic Observations	LF	Enlargement procedure	Enlargement procedure	C1293134	enlargement	RID3775
enlargement of the left hilus	enlargement	enlargement	Diagnostic Observations	LF	Enlargement procedure	Enlargement procedure	C1293134	enlargement	RID3775
enlargement of the left pulmonary artery	enlargement	enlargement	Diagnostic Observations	LF	Enlargement procedure	Enlargement procedure	C1293134	enlargement	RID3775
enlargement of the left ventricle	enlargement	enlargement	Diagnostic Observations	LF	Enlargement procedure	Enlargement procedure	C1293134	enlargement	RID3775
enlargement of the pulmonary arteries	enlargement	enlargement	Diagnostic Observations	LF	Enlargement procedure	Enlargement procedure	C1293134	enlargement	RID3775
enlargement of the right hilum	enlargement	enlargement	Diagnostic Observations	LF	Enlargement procedure	Enlargement procedure	C1293134	enlargement	RID3775
enlargement of the right hilus	enlargement	enlargement	Diagnostic Observations	LF	Enlargement procedure	Enlargement procedure	C1293134	enlargement	RID3775
enlargement of the thyroid	enlargement	enlargement	Diagnostic Observations	LF	Enlargement procedure	Enlargement procedure	C1293134	enlargement	RID3775
heart enlargement	enlargement	enlargement	Diagnostic Observations	LF	Enlargement procedure	Enlargement procedure	C1293134	enlargement	RID3775
hilar enlargement	enlargement	enlargement	Diagnostic Observations	LF	Enlargement procedure	Enlargement procedure	C1293134	enlargement	RID3775
left atrial enlargement	enlargement	enlargement	Diagnostic Observations	LF	Enlargement procedure	Enlargement procedure	C1293134	enlargement	RID3775
left atrium enlargement	enlargement	enlargement	Diagnostic Observations	LF	Enlargement procedure	Enlargement procedure	C1293134	enlargement	RID3775
left hilar enlargement	enlargement	enlargement	Diagnostic Observations	LF	Enlargement procedure	Enlargement procedure	C1293134	enlargement	RID3775
left ventricular enlargement	enlargement	enlargement	Diagnostic Observations	LF	Enlargement procedure	Enlargement procedure	C1293134	enlargement	RID3775
lymph node enlargement	enlargement	enlargement	Diagnostic Observations	LF	Enlargement procedure	Enlargement procedure	C1293134	enlargement	RID3775
mediastinal enlargement	enlargement	enlargement	Diagnostic Observations	LF	Enlargement procedure	Enlargement procedure	C1293134	enlargement	RID3775
pulmonary arteries enlargement	enlargement	enlargement	Diagnostic Observations	LF	Enlargement procedure	Enlargement procedure	C1293134	enlargement	RID3775
pulmonary artery enlargement	enlargement	enlargement	Diagnostic Observations	LF	Enlargement procedure	Enlargement procedure	C1293134	enlargement	RID3775
right atrial enlargement	enlargement	enlargement	Diagnostic Observations	LF	Enlargement procedure	Enlargement procedure	C1293134	enlargement	RID3775
right atrium enlargement	enlargement	enlargement	Diagnostic Observations	LF	Enlargement procedure	Enlargement procedure	C1293134	enlargement	RID3775
right hilar enlargement	enlargement	enlargement	Diagnostic Observations	LF	Enlargement procedure	Enlargement procedure	C1293134	enlargement	RID3775
right hilar lymph node enlargement	enlargement	enlargement	Diagnostic Observations	LF	Enlargement procedure	Enlargement procedure	C1293134	enlargement	RID3775
right ventricular enlargement	enlargement	enlargement	Diagnostic Observations	LF	Enlargement procedure	Enlargement procedure	C1293134	enlargement	RID3775
thyroid enlargement	enlargement	enlargement	Diagnostic Observations	LF	Enlargement procedure	Enlargement procedure	C1293134	enlargement	RID3775
thyroidal enlargement	enlargement	enlargement	Diagnostic Observations	LF	Enlargement procedure	Enlargement procedure	C1293134	enlargement	RID3775
vascular enlargement	enlargement	enlargement	Diagnostic Observations	LF	Enlargement procedure	Enlargement procedure	C1293134	enlargement	RID3775
enlargement and distortion	enlargement and distortion	enlargement and distortion	Diagnostic Observations	LF	Enlargement procedure	Enlargement procedure	C1293134	enlargement	RID3775
enlargement and distortion of the cardiac silhouette	enlargement and distortion	enlargement and distortion	Diagnostic Observations	LF	Enlargement procedure	Enlargement procedure	C1293134	enlargement	RID3775
enteric catheter	enteric catheter	enteric catheter	Medical Devices	OTH	catheter device	catheter device	C0085590	catheter	RID5576
enteric drainage tube	enteric drainage tube	enteric drainage tube	Medical Devices	OTH	tube	tube	C1561954	drainage, tube	RID10417, RID5555
enteric feeding cord tube	enteric feeding cord tube	enteric feeding cord tube	Medical Devices	OTH	Feeding tube	Feeding tube	C2945625	feeding tube	RID5561
enteric feeding tube	enteric feeding tube	enteric feeding tube	Medical Devices	OTH	Feeding tube	Feeding tube	C2945625	feeding tube	RID5561
enteric feeding tube tip	enteric feeding tube tip	enteric feeding tube tip	Medical Devices	OTH	device tip (physical object)	device tip (physical object)	C3872494
enteric tube	enteric tube	enteric tube	Medical Devices	OTH	tube	tube	C1561954	tube	RID5555
removal of enteric tube	enteric tube	enteric tube	Medical Devices	OTH	tube	tube	C1561954	tube	RID5555
enteric tube tip	enteric tube tip	enteric tube tip	Medical Devices	OTH	device tip (physical object)	device tip (physical object)	C3872494
enteric tubes	enteric tubes	enteric tube	Medical Devices	OTH	tube	tube	C1561954	tube	RID5555
calcified enthesopathy	enthesopathy	enthesopathy	Diseases and Disorders	PF
enthesopathy	enthesopathy	enthesopathy	Diseases and Disorders	PF	Enthesopathy	Enthesopathy	C0242490	calcified, enthesopathy	RID5747, RID5073
entrapment	entrapment	entrapment	Diseases and Disorders	PF	Tendon Entrapment	Tendon Entrapment	C0158329
lung entrapment	entrapment	entrapment	Diseases and Disorders	PF
eosinophilic interstitial lung disease	eosinophilic interstitial lung disease	eosinophilic interstitial lung disease	Diseases and Disorders	CF	lung diseases, interstitial	lung diseases, interstitial	C0206062	interstitial lung disease	RID28799
eosinophilic pna	eosinophilic pna	eosinophilic pneumonia	Diseases and Disorders	CF	Pneumonia	Pneumonia	C0032285	pneumonia	RID5350
eosinophilic pneumonia	eosinophilic pneumonia	eosinophilic pneumonia	Diseases and Disorders	CF	Pneumonia	Pneumonia	C0032285	pneumonia	RID5350
eosinophillic pneumonia	eosinophillic pneumonia	eosinophilic pneumonia	Diseases and Disorders	CF	Pneumonia	Pneumonia	C0032285	pneumonia	RID5350
epicardial fat pad	epicardial fat pad	epicardial fat pad	Anatomical Entities	LF	Fat pad	Fat pad	C0935625	fat	RID1538
epicardial leads	epicardial leads	epicardial lead	Medical Devices	OTH	Leads (device)	Leads (device)	C0181586	lead	RID11924
epidural abscess	epidural abscess	epidural abscess	Diseases and Disorders	NCD	Epidural Abscess	Epidural Abscess	C0270629	abscess	RID3711
epidural anesthesia catheter	epidural anesthesia catheter	epidural anesthesia catheter	Medical Devices	OTH	catheter device	catheter device	C0085590	catheter	RID5576
epidural catheter	epidural catheter	epidural catheter	Medical Devices	OTH	catheter device	catheter device	C0085590	catheter	RID5576
epigastric discomfort	epigastric discomfort	epigastric discomfort	Symptoms and Signs	Patient Info.	Epigastric discomfort	Epigastric discomfort	C1291078
epigastric pain	epigastric pain	epigastric pain	Symptoms and Signs	Patient Info.	Epigastric pain	Epigastric pain	C0232493	pain	RID28803
epilepsy	epilepsy	epilepsy	Diseases and Disorders	NCD	Epilepsy	Epilepsy	C0014544
epistaxis	epistaxis	epistaxis	Symptoms and Signs	Patient Info.	Epistaxis	Epistaxis	C0014591
ercp	ercp	endoscopic retrograde cholangiopancreatography	Procedures and Surgeries	OTH	Consent Type - ERCP	Consent Type - ERCP	C1548852
esophageal adenocarcinoma	esophageal adenocarcinoma	esophageal adenocarcinoma	Diseases and Disorders	NCD	Adenocarcinoma	Adenocarcinoma	C0001418	adenocarcinoma	RID4226
esophageal cancer	esophageal cancer	esophageal cancer	Diseases and Disorders	NCD	stage, esophageal cancer	stage, esophageal cancer	C0280257	esophageal cancer	RID45696
esophageal capsule	esophageal capsule	esophageal capsule	Medical Devices	OTH
esophageal carcinoma	esophageal carcinoma	esophageal carcinoma	Diseases and Disorders	NCD	Esophageal carcinoma	Esophageal carcinoma	C0152018
esophageal catheter	esophageal catheter	esophageal catheter	Medical Devices	OTH	catheter device	catheter device	C0085590	catheter	RID5576
esophageal drainage tube	esophageal drainage tube	esophageal drainage tube	Medical Devices	OTH	Esophageal tube	Esophageal tube	C0184115	tube	RID5555
esophageal fistula	esophageal fistula	esophageal fistula	Diseases and Disorders	NCD	Esophageal Fistula	Esophageal Fistula	C0014856
esophageal manometer	esophageal manometer	esophageal manometer	Medical Devices	OTH	Esophageal manometer	Esophageal manometer	C0182370
esophageal perforation	esophageal perforation	esophageal perforation	Diseases and Disorders	COF	Esophageal Perforation	Esophageal Perforation	C0014860	perforation	RID4944
esophageal stent	esophageal stent	esophageal stent	Medical Devices	OTH	Esophageal stent	Esophageal stent	C0183514	stent	RID5598
esophageal stent migration	esophageal stent	esophageal stent	Medical Devices	OTH	Esophageal stent	Esophageal stent	C0183514	stent	RID5598
esophageal stent placement	esophageal stent	esophageal stent	Medical Devices	OTH	Esophageal stent	Esophageal stent	C0183514	stent	RID5598
esophageal stent replacement	esophageal stent	esophageal stent	Medical Devices	OTH	Esophageal stent	Esophageal stent	C0183514	stent	RID5598
esophageal stents	esophageal stents	esophageal stent	Medical Devices	OTH	Esophageal stent	Esophageal stent	C0183514	stent	RID5598
migrated esophageal stents	esophageal stents	esophageal stent	Medical Devices	OTH	Esophageal stent	Esophageal stent	C0183514	stent	RID5598
esophageal stricture	esophageal stricture	esophageal stricture	Diseases and Disorders	NCD	Esophageal Stricture	Esophageal Stricture	C4551650	stricture	RID5022
esophageal surgery	esophageal surgery	esophageal surgery	Procedures and Surgeries	OTH
esophageal tube	esophageal tube	esophageal tube	Medical Devices	OTH	Esophageal tube	Esophageal tube	C0184115	tube	RID5555
esophageal varices	esophageal varices	esophageal varix	Diseases and Disorders	COF	Esophageal Varices	Esophageal Varices	C0014867
esophageal-pleural fistula	esophageal-pleural fistula	esophageal-pleural fistula	Diseases and Disorders	CF	Esophageal Fistula	Esophageal Fistula	C0014856
esophagectomy	esophagectomy	esophagectomy	Procedures and Surgeries	OTH	Esophagectomy	Esophagectomy	C0085198	esophagectomy	RID1600
esophagogastrectomy	esophagogastrectomy	esophagogastrectomy	Procedures and Surgeries	OTH	Esophagogastrectomy	Esophagogastrectomy	C0192296
esophagogastroduodenoscopy	esophagogastroduodenoscopy	esophagogastroduodenoscopy	Procedures and Surgeries	OTH	Esophagogastroduodenoscopy	Esophagogastroduodenoscopy	C0079304
esophagopleural fistula	esophagopleural fistula	esophagopleural fistula	Diseases and Disorders	CF	Pleural fistula	Pleural fistula	C1405128
esophagoscopy	esophagoscopy	esophagoscopy	Procedures and Surgeries	OTH	Esophagoscopy	Esophagoscopy	C0014873
dilated esophagus	esophagus	esophagus	Anatomical Entities	LF	Esophagus	Esophagus	C0014876	esophagus	RID95
esophagus	esophagus	esophagus	Anatomical Entities	LF	Esophagus	Esophagus	C0014876	esophagus	RID95
fluid-filled esophagus	esophagus	esophagus	Anatomical Entities	LF	Esophagus	Esophagus	C0014876	esophagus	RID95
esrd	esrd	end stage renal disease	Diseases and Disorders	NCD	chronic kidney disease stage 5	chronic kidney disease stage 5	C2316810
et placement	et	et tube	Medical Devices	OTH	Endotracheal tube	Endotracheal tube	C0336630	endotracheal tube	RID5557
et tip	et tip	et tip	Medical Devices	OTH
et tube	et tube	et tube	Medical Devices	OTH	Endotracheal tube	Endotracheal tube	C0336630	endotracheal tube	RID5557
et tube placement	et tube	et tube	Medical Devices	OTH	Endotracheal tube	Endotracheal tube	C0336630	endotracheal tube	RID5557
et tube position	et tube	et tube	Medical Devices	OTH	Endotracheal tube	Endotracheal tube	C0336630	endotracheal tube	RID5557
et tube cuff	et tube cuff	et tube cuff	Medical Devices	OTH	Endotracheal tube	Endotracheal tube	C0336630	endotracheal tube	RID5557
et tube tip	et tube tip	et tube tip	Medical Devices	OTH	device tip (physical object)	device tip (physical object)	C3872494
et tubes	et tubes	tube	Medical Devices	OTH	Endotracheal tube	Endotracheal tube	C0336630	endotracheal tube	RID5557
etiology of chest pain	etiology of chest pain	etiology of chest pain	Diagnostic Observations	Patient Info.	Chest Pain	Chest Pain	C0008031	chest pain	RID45774
etoh abuse	etoh abuse	ethanol abuse	Diseases and Disorders	Patient Info.	Abuse	Abuse	C1546935
etoh hepatitis	etoh hepatitis	ethanol hepatitis	Diseases and Disorders	NCD	Hepatitis	ethanol	C0001962
ett	ett	endotracheal tube	Medical Devices	OTH	Endotracheal tube	Endotracheal tube	C0336630	endotracheal tube	RID5557
ett placement	ett	endotracheal tube	Medical Devices	OTH	Endotracheal tube	Endotracheal tube	C0336630	endotracheal tube	RID5557
ett tip	ett tip	endotracheal tube tip	Medical Devices	OTH	device tip (physical object)	device tip (physical object)	C3872494
ett tube	ett tube	endotracheal tube	Medical Devices	OTH	Endotracheal tube	Endotracheal tube	C0336630	endotracheal tube	RID5557
evaluation	evaluation	evaluation	Diagnostic Observations	LF	Evaluation	Evaluation	C0220825
evaluation of the left lung base	evaluation	evaluation	Diagnostic Observations	LF	Evaluation	Evaluation	C0220825
evaluation of the left mid to lower lung	evaluation	evaluation	Diagnostic Observations	LF	Evaluation	Evaluation	C0220825
eventration	eventration	eventration	Diseases and Disorders	CF	Diaphragmatic Eventration	Diaphragmatic Eventration	C0011981	right hemidiaphragm, eventration	RID1526, RID5248
hemidiaphragm eventration	eventration	eventration	Diseases and Disorders	CF	Eventration	Eventration	C0015207	eventration	RID5248
exacerbation	exacerbation	exacerbation	Diseases and Disorders	CF	Exacerbation	Exacerbation	C4086268
exacerbations	exacerbations	exacerbation	Diseases and Disorders	CF	Exacerbation	Exacerbation	C4086268
exlap loa	exlap loa	Exploratory Laparotomy	Procedures and Surgeries	OTH	Loa loa	Loa loa	C0023924
exogenous lipoid pneumonia	exogenous lipoid pneumonia	exogenous lipoid pneumonia	Diseases and Disorders	CF	Pneumonia	Pneumonia	C0032285	pneumonia	RID5350
expansion	expansion	expansion	Diagnostic Observations	PF
lung expansion	expansion	expansion	Diagnostic Observations	PF
extbation	extbation	extubation	Procedures and Surgeries	OTH
extension	extension	extension	Diagnostic Observations	LF				extension position	RID10427
extension into the right minor fissure	extension	extension	Diagnostic Observations	LF
extensive cardiac history	extensive cardiac history	extensive cardiac history	Diagnostic Observations	Patient Info.	History	History	C0019664
external device	external device	external device	Medical Devices	OTH	medical devices	medical devices	C0025080
external pacemaker	external pacemaker	external pacemaker	Medical Devices	OTH	pacemakers	pacemakers	C0810633	pacemaker	RID5436
extubated	extubated	extubated	Procedures and Surgeries	Patient Info.	Tracheal Extubation	Tracheal Extubation	C0553891
extubation	extubation	extubation	Procedures and Surgeries	OTH	Tracheal Extubation	Tracheal Extubation	C0553891
extubation interval study	extubation interval study	extubation interval study	Procedures and Surgeries	Patient Info.	Interval	Interval	C1272706
failed renal transplant	fail renal transplant	fail renal transplant	Medical Devices	OTH	fail renal transplant	fail renal transplant	C0403597
failed dialysis access attempts	failed dialysis access attempts	failed dialysis access attempt	Procedures and Surgeries	Patient Info.	Dialysis Access Complication	Physical Dialysis	C0011945
failed extubation	failed extubation	fail extubation	Symptoms and Signs	Patient Info.	Tracheal Extubation	Tracheal Extubation	C0553891
failing kidney transplant	failing kidney transplant	fail kidney transplant	Diseases and Disorders	NCD	Kidney Transplantation	Kidney Transplantation	C0022671
failure	failure	failure	Diagnostic Observations	CF	Failure	Failure	C5200924
failure to thrive	failure to thrive	failure to thrive	Diseases and Disorders	Patient Info.
failure to wean from vent	failure to wean from vent	failure to wean from vent	Symptoms and Signs	Patient Info.
fall	fall	fall	Events and Incidents	Patient Info.	Falls	Falls	C0085639
fall downstairs	fall downstairs	fall downstairs	Events and Incidents	Patient Info.	Falls	Falls	C0085639
falls	falls	falls	Events and Incidents	Patient Info.	Falls	Falls	C0085639
fat	fat	fat	Anatomical Entities	LF
mediastinal fat	fat	fat	Anatomical Entities	LF
pericardial fat	fat	fat	Anatomical Entities	LF
posterior pleural fat	fat	fat	Anatomical Entities	LF
fat deposition	fat deposition	fat deposition	Diagnostic Observations	PF	Deposition	Deposition	C0333562	fat deposition	RID5216
fat embolism syndrome	fat embolism syndrome	fat embolism syndrome	Diseases and Disorders	NCD	Fat embolism (disorder)	Fat embolism (disorder)	C0013928	fat embolism	RID4839
fat pad	fat pad	fat pad	Anatomical Entities	LF	Fat pad	Fat pad	C0935625
mediastinal fat pad	fat pad	fat pad	Anatomical Entities	LF	Fat pad	Fat pad	C0935625
pericardial fat pad	fat pad	fat pad	Anatomical Entities	LF	Fat pad	Fat pad	C0935625
fat pads	fat pads	fat pad	Anatomical Entities	LF	Fat pad	Fat pad	C0935625
pericardial fat pads	fat pads	fat pad	Anatomical Entities	LF	Fat pad	Fat pad	C0935625
fatigue	fatigue	fatigue	Symptoms and Signs	Patient Info.	Fatigue	Fatigue	C0015672
fdg-avid nodules	fdg-avid nodules	fdg-avid nodule	Diseases and Disorders	COF	Nodule	Nodule	C0028259	pulmonary nodule	RID50149
febrile	febrile	febrile	Symptoms and Signs	Patient Info.	Febrile Convulsions	Febrile Convulsions	C0009952
febrile neutropenia	febrile neutropenia	febrile neutropenia	Diseases and Disorders	COF	Neutropenia	Neutropenia	C0027947
feeding tube	feeding tube	feeding tube	Medical Devices	OTH	Feeding tube	Feeding tube	C2945625	feeding tube	RID5561
malposition of the feeding tube	feeding tube	feeding tube	Medical Devices	OTH	Feeding tube	Feeding tube	C2945625	feeding tube	RID5561
feeding tube tip	feeding tube tip	feeding tube tip	Medical Devices	OTH	device tip (physical object)	device tip (physical object)	C3872494
feeding tubes	feeding tubes	feeding tube	Medical Devices	OTH	Feeding tube	Feeding tube	C2945625	feeding tube	RID5561
feeling hot	feeling hot	feel hot	Symptoms and Signs	Patient Info.	Hot Temperature	Hot Temperature	C2350229
fev1	fev1	fev1	Diagnostic Observations	COF
fever	fever	fever	Diagnostic Observations	COF	Fever	Fever	C0015967	fever	RID39083
fever spike	fever spike	fever spike	Diagnostic Observations	COF
fevers	fevers	fever	Diagnostic Observations	COF	Fever	Fever	C0015967	fever	RID39083
fibrocalcific changes	fibrocalcific changes	fibrocalcific change	Diseases and Disorders	PF	Change -- procedure	Change -- procedure	C4319952	change	RID49896
fibronodular changes	fibronodular changes	fibronodular change	Diseases and Disorders	PF	Change -- procedure	Change -- procedure	C4319952	change	RID49896
biapical fibrosis	fibrosis	fibrosis	Diseases and Disorders	PF	Fibrosis	Fibrosis	C0016059	fibrosis	RID3820
biapical fibrosis	fibrosis	fibrosis	Diseases and Disorders	PF	Fibrosis	Fibrosis	C0016059	fibrosis	RID3820
chronic fibrosis	fibrosis	fibrosis	Diseases and Disorders	PF	Fibrosis	Fibrosis	C0016059	fibrosis	RID3820
chronic fibrosis	fibrosis	fibrosis	Diseases and Disorders	PF	Fibrosis	Fibrosis	C0016059	fibrosis	RID3820
early fibrosis	fibrosis	fibrosis	Diseases and Disorders	PF	Fibrosis	Fibrosis	C0016059	fibrosis	RID3820
early fibrosis	fibrosis	fibrosis	Diseases and Disorders	PF	Fibrosis	Fibrosis	C0016059	fibrosis	RID3820
fibrosis	fibrosis	fibrosis	Diseases and Disorders	PF	Fibrosis	Fibrosis	C0016059	fibrosis	RID3820
fibrosis	fibrosis	fibrosis	Diseases and Disorders	PF	Fibrosis	Fibrosis	C0016059	fibrosis	RID3820
lung fibrosis	fibrosis	fibrosis	Diseases and Disorders	PF	Fibrosis	Fibrosis	C0016059	fibrosis	RID3820
lung fibrosis	fibrosis	fibrosis	Diseases and Disorders	PF	Fibrosis	Fibrosis	C0016059	fibrosis	RID3820
pulmonary fibrosis	fibrosis	fibrosis	Diseases and Disorders	PF	Fibrosis	Fibrosis	C0016059	fibrosis	RID3820
pulmonary fibrosis	fibrosis	fibrosis	Diseases and Disorders	PF	Fibrosis	Fibrosis	C0016059	fibrosis	RID3820
right paramediastinal fibrosis	fibrosis	fibrosis	Diseases and Disorders	PF	Fibrosis	Fibrosis	C0016059	fibrosis	RID3820
right paramediastinal fibrosis	fibrosis	fibrosis	Diseases and Disorders	PF	Fibrosis	Fibrosis	C0016059	fibrosis	RID3820
right perihilar fibrosis	fibrosis	fibrosis	Diseases and Disorders	PF	Fibrosis	Fibrosis	C0016059	fibrosis	RID3820
right perihilar fibrosis	fibrosis	fibrosis	Diseases and Disorders	PF	Fibrosis	Fibrosis	C0016059	fibrosis	RID3820
fibrotic changes	fibrotic changes	fibrotic change	Diseases and Disorders	PF	Change -- procedure	Change -- procedure	C4319952	change	RID49896
fibrotic healing	fibrotic healing	fibrotic heal	Diseases and Disorders	PF	Wound Healing	Wound Healing	C0043240	healing	RID6352
fiducial marker	fiducial marker	fiducial marker	Medical Devices	OTH	Fiducial	Fiducial	C1708056	fiducial marker	RID28789
fiducial seed	fiducial seed	fiducial seed	Medical Devices	OTH	Fiducial	Fiducial	C1708056
fiducial seeds	fiducial seeds	fiducial seed	Medical Devices	OTH	Seed Bank	Seed Bank	C4042839
fifth sternal wire	fifth sternal wire	fifth sternal wire	Medical Devices	OTH	wire device	wire device	C4522306	wire	RID5453
filling	filling	filling	Diagnostic Observations	LF	Has filling	Has filling	C5394943
filter	filter	filter	Medical Devices	OTH	Filter (function)	Filter (function)	C1704449
acute findings	findings	finding	Diagnostic Observations	LF	Finding	Finding	C0243095	clinical finding	RID34785
bony findings	findings	finding	Diagnostic Observations	LF	Finding	Finding	C0243095	clinical finding	RID34785
cardiac findings	findings	finding	Diagnostic Observations	LF	Finding	Finding	C0243095	clinical finding	RID34785
cardiopulmonary findings	findings	finding	Diagnostic Observations	LF	Finding	Finding	C0243095	clinical finding	RID34785
chest findings	findings	finding	Diagnostic Observations	LF	Finding	Finding	C0243095	clinical finding	RID34785
chronic findings	findings	finding	Diagnostic Observations	LF	Finding	Finding	C0243095	clinical finding	RID34785
findings in the chest	findings	finding	Diagnostic Observations	LF	Finding	Finding	C0243095	clinical finding	RID34785
findings in the lungs	findings	finding	Diagnostic Observations	LF	Finding	Finding	C0243095	clinical finding	RID34785
lung findings	findings	finding	Diagnostic Observations	LF	Finding	Finding	C0243095	clinical finding	RID34785
pleural-parenchymal findings	findings	finding	Diagnostic Observations	LF	Finding	Finding	C0243095	clinical finding	RID34785
pulmonary findings	findings	finding	Diagnostic Observations	LF	Finding	Finding	C0243095	clinical finding	RID34785
relevant findings	findings	finding	Diagnostic Observations	LF	Finding	Finding	C0243095	clinical finding	RID34785
skeletal findings	findings	finding	Diagnostic Observations	LF	Finding	Finding	C0243095	clinical finding	RID34785
vascular findings	findings	finding	Diagnostic Observations	LF	Finding	Finding	C0243095	clinical finding	RID34785
findings related to ipf	findings related to ipf	findings related to IPF	Diagnostic Observations	PF	Finding	Finding	C0243095	clinical finding	RID34785
fissural component	fissural component	fissural component	Anatomical Entities	LF	Component object	Component object	C0449432
fissures	fissures	fissure	Anatomical Entities	LF	Fissure	Fissure	C0332469	pulmonary fissure	RID43257
fistula	fistula	fistula	Diseases and Disorders	CF	pathologic fistula	pathologic fistula	C0016169	fistula	RID4843
flank pain	flank pain	flank pain	Symptoms and Signs	Patient Info.	Flank Pain	Flank Pain	C0016199
flash edema	flash edema	flash edema	Diseases and Disorders	CF	Edema	Edema	C0013604	edema	RID4865
flash pulm edema	flash pulm edema	flash pulmonary edema	Diseases and Disorders	CF	Edema	Edema	C0013604	edema	RID4865
flash pulmonary edema	flash pulmonary edema	flash pulmonary edema	Diseases and Disorders	CF	Edema	Edema	C0013604	edema	RID4865
flattening	flattening	flattening	Diagnostic Observations	LF	flattened	flattened	C0016203	flat	RID6277
flattening hemidiaphragms	flattening	flattening	Diagnostic Observations	LF	flattened	flattened	C0016203	flat	RID6277
flattening of the bilateral hemidiaphragms	flattening	flattening	Diagnostic Observations	LF	flattened	flattened	C0016203	flat	RID6277
flattening of the diaphragms	flattening	flattening	Diagnostic Observations	LF	flattened	flattened	C0016203	flat	RID6277
flattening of the hemidiaphragm	flattening	flattening	Diagnostic Observations	LF	flattened	flattened	C0016203	flat	RID6277
flattening of the hemidiaphragms	flattening	flattening	Diagnostic Observations	LF	flattened	flattened	C0016203	flat	RID6277
flattening of the right humeral head	flattening	flattening	Diagnostic Observations	LF	flattened	flattened	C0016203	flat	RID6277
flu	flu	flu	Diseases and Disorders	CF	Influenza	Influenza	C0021400
flu-like symptoms	flu-like symptoms	flu-like symptom	Symptoms and Signs	Patient Info.	Symptoms	Symptoms	C1457887
chronic fluid	fluid	fluid	Diagnostic Observations	PF	Pleural fluid	Pleural fluid	C0225778	fluid	RID1547
esophageal fluid	fluid	fluid	Diagnostic Observations	PF	Pleural fluid	Pleural fluid	C0225778	fluid	RID1547
fissural fluid	fluid	fluid	Diagnostic Observations	PF	Pleural fluid	Pleural fluid	C0225778	fluid	RID1547
fissural loculation of pleural fluid	fluid	fluid	Diagnostic Observations	PF	Pleural fluid	Pleural fluid	C0225778	fluid	RID1547
fissural pleural fluid	fluid	fluid	Diagnostic Observations	PF	Pleural fluid	Pleural fluid	C0225778	fluid	RID1547
fluid	fluid	fluid	Diagnostic Observations	PF	Pleural fluid	Pleural fluid	C0225778	fluid	RID1547
fluid in bullae	fluid	fluid	Diagnostic Observations	PF	Pleural fluid	Pleural fluid	C0225778	fluid	RID1547
fluid in the fissure	fluid	fluid	Diagnostic Observations	PF	Pleural fluid	Pleural fluid	C0225778	fluid	RID1547
fluid in the pleural space	fluid	fluid	Diagnostic Observations	PF	Pleural fluid	Pleural fluid	C0225778	fluid	RID1547
fluid within the fissure	fluid	fluid	Diagnostic Observations	PF	Pleural fluid	Pleural fluid	C0225778	fluid	RID1547
layering fluid	fluid	fluid	Diagnostic Observations	PF	Pleural fluid	Pleural fluid	C0225778	fluid	RID1547
loculated fluid	fluid	fluid	Diagnostic Observations	PF	Pleural fluid	Pleural fluid	C0225778	fluid	RID1547
loculated pleural fluid	fluid	fluid	Diagnostic Observations	PF	Pleural fluid	Pleural fluid	C0225778	fluid	RID1547
paramediastinal pleural fluid	fluid	fluid	Diagnostic Observations	PF	Pleural fluid	Pleural fluid	C0225778	fluid	RID1547
pleural fluid	fluid	fluid	Diagnostic Observations	PF	Pleural fluid	Pleural fluid	C0225778	fluid	RID1547
radiopaque fluid	fluid	fluid	Diagnostic Observations	PF	Pleural fluid	Pleural fluid	C0225778	fluid	RID1547
right pleural fluid	fluid	fluid	Diagnostic Observations	PF	Pleural fluid	Pleural fluid	C0225778	fluid	RID1547
fissure oral fluid accumulation	fluid accumulation	fluid accumulation	Diagnostic Observations	PF	Pleural fluid, Accumulation	Pleural fluid, Accumulation	C0225778, C4055506	fluid	RID1547
fluid accumulation	fluid accumulation	fluid accumulation	Diagnostic Observations	PF	Pleural fluid, Accumulation	Pleural fluid, Accumulation	C0225778, C4055506	fluid	RID1547
fluid and consolidation	fluid and consolidation	fluid and consolidation	Diagnostic Observations	PF	Pleural fluid	Pleural fluid	C0225778	fluid	RID1547
anterior chest fluid collection	fluid collection	fluid collection	Diagnostic Observations	PF	Pleural fluid, Collection (action)	Collection (action)	C0225778, C1516698	fluid	RID1547
fissural fluid collection	fluid collection	fluid collection	Diagnostic Observations	PF	Pleural fluid, Collection (action)	Collection (action)	C0225778, C1516698	fluid	RID1547
fluid collection	fluid collection	fluid collection	Diagnostic Observations	PF	Pleural fluid, Collection (action)	Collection (action)	C0225778, C1516698	fluid	RID1547
loculation of right pleural fluid collection	fluid collection	fluid collection	Diagnostic Observations	PF	Pleural fluid, Collection (action)	Collection (action)	C0225778, C1516698	fluid	RID1547
pleural fluid collection	fluid collection	fluid collection	Diagnostic Observations	PF	Pleural fluid, Collection (action)	Collection (action)	C0225778, C1516698	fluid	RID1547
retro sternal fluid collection	fluid collection	fluid collection	Diagnostic Observations	PF	Pleural fluid, Collection (action)	Collection (action)	C0225778, C1516698	fluid	RID1547
fluid content	fluid content	fluid content	Diagnostic Observations	PF	Pleural fluid	Pleural fluid	C0225778	fluid	RID1547
fluid contents	fluid contents	fluid content	Diagnostic Observations	PF	Pleural fluid	Pleural fluid	C0225778	fluid	RID1547
fluid density	fluid density	fluid density	Diagnostic Observations	PF	Pleural fluid	Pleural fluid	C0225778	fluid	RID1547
pleural fluid density	fluid density	fluid density	Diagnostic Observations	PF	Pleural fluid	Pleural fluid	C0225778	fluid	RID1547
fluid draining	fluid draining	fluid draining	Procedures and Surgeries	Patient Info.	Pleural fluid	Pleural fluid	C0225778	fluid	RID1547
fluid effusion	fluid effusion	fluid effusion	Diseases and Disorders	PF	Pleural effusion fluid	Pleural effusion fluid	C1253943	fluid, effusion	RID1547, RID4872
fluid filling	fluid filling	fluid accumulation	Diagnostic Observations	PF	Pleural fluid, Accumulation	Pleural fluid, Accumulation	C0225778, C4055506	fluid	RID1547
fluid filling in the esophagus	fluid filling	fluid filling	Diagnostic Observations	PF	Pleural fluid	Pleural fluid	C0225778	fluid	RID1547
fluid overload	fluid overload	fluid overload	Diseases and Disorders	COF	Fluid overload	Fluid overload	C0546817	fluid	RID1547
fluid resuscitation	fluid resuscitation	fluid resuscitation	Procedures and Surgeries	OTH	Fluid resuscitation	Resuscitation procedure	C0035273	fluid	RID1547
fluid status	fluid status	fluid status	Diagnostic Observations	Patient Info.	Pleural fluid	Pleural fluid	C0225778	fluid	RID1547
fluid tracking	fluid tracking	fluid tracking	Diagnostic Observations	PF	Pleural fluid	Pleural fluid	C0225778	fluid	RID1547
fluid volume	fluid volume	fluid volume	Diagnostic Observations	PF	Pleural fluid, Volume	Pleural fluid, Volume	C0225778, C0449468	fluid, volume	RID1547, RID28668
pleural fluid volume	fluid volume	fluid volume	Diagnostic Observations	PF	Pleural fluid, Volume	Pleural fluid, Volume	C0225778, C0449468	fluid, volume	RID1547, RID28668
dilated fluid-filled esophagus	fluid-filled esophagus	fluid-filled esophagus	Diagnostic Observations	LF	Pleural fluid, Esophagus	Pleural fluid, Esophagus	C0225778, C0014876	fluid, esophagus	RID1547, RID95
foci	foci	focus	Diagnostic Observations	LF	Focal	Focal	C0205234	foci	RID34302
nodular foci	foci	focus	Diagnostic Observations	LF	Focal	Focal	C0205234	foci	RID34302
calcific focus	focus	focus	Diagnostic Observations	LF	Focal	Focal	C0205234	foci	RID34302
lucent focus	focus	focus	Diagnostic Observations	LF	Focal	Focal	C0205234	foci	RID34302
nodular focus	focus	focus	Diagnostic Observations	LF	Focal	Focal	C0205234	foci	RID34302
focus of infection	focus of infection	focus of infection	Diseases and Disorders	CF	Infection	Infection	C3714514	infection	RID3710
followup examination	followup examination	followup examination	Procedures and Surgeries	OTH	Examination	Examination	C4321457
foot pain	foot pain	foot pain	Symptoms and Signs	Patient Info.	Foot pain	Foot pain	C0016512
foreign body	foreign body	foreign body	Medical Devices	OTH	Foreign body (physical object)	Foreign body (physical object)	C4522195	foreign body	RID5425
foreign body sensation	foreign body sensation	foreign body sensation	Symptoms and Signs	Patient Info.	Foreign body sensation (finding)	Foreign body sensation (finding)	C0423602	foreign body	RID5425
foul-smelling urine	foul-smelling urine	foul-smelling urine	Symptoms and Signs	Patient Info.	Urine
found on the floor	found on the floor	found on the floor	Events and Incidents	Patient Info.	floor (object)	floor (object)	C0016249	floor	RID5959
8th rib fracture	fracture	fracture	Diseases and Disorders	PF	Fracture	Fracture	C0016658	fracture	RID4650
acute fracture	fracture	fracture	Diseases and Disorders	PF	Fracture	Fracture	C0016658	fracture	RID4650
clavicle fracture	fracture	fracture	Diseases and Disorders	PF	Fracture	Fracture	C0016658	fracture	RID4650
clavicular fracture	fracture	fracture	Diseases and Disorders	PF	Fracture	Fracture	C0016658	fracture	RID4650
displaced fracture	fracture	fracture	Diseases and Disorders	PF	Fracture	Fracture	C0016658	fracture	RID4650
first left rib fracture	fracture	fracture	Diseases and Disorders	PF	Fracture	Fracture	C0016658	fracture	RID4650
fracture	fracture	fracture	Diseases and Disorders	PF	Fracture	Fracture	C0016658	fracture	RID4650
fracture of the left 11th rib	fracture	fracture	Diseases and Disorders	PF	Fracture	Fracture	C0016658	fracture	RID4650
healed rib fracture	fracture	fracture	Diseases and Disorders	PF	Fracture	Fracture	C0016658	fracture	RID4650
hip fracture	fracture	fracture	Diseases and Disorders	PF	Fracture	Fracture	C0016658	fracture	RID4650
left 11th rib fracture	fracture	fracture	Diseases and Disorders	PF	Fracture	Fracture	C0016658	fracture	RID4650
left clavicular fracture	fracture	fracture	Diseases and Disorders	PF	Fracture	Fracture	C0016658	fracture	RID4650
left mid clavicular fracture	fracture	fracture	Diseases and Disorders	PF	Fracture	Fracture	C0016658	fracture	RID4650
nondisplaced rib fracture	fracture	fracture	Diseases and Disorders	PF	Fracture	Fracture	C0016658	fracture	RID4650
rib fracture	fracture	fracture	Diseases and Disorders	PF	Fracture	Fracture	C0016658	fracture	RID4650
surgical fracture	fracture	fracture	Diseases and Disorders	PF	Fracture	Fracture	C0016658	fracture	RID4650
t12 fracture	fracture	fracture	Diseases and Disorders	PF	Fracture	Fracture	C0016658	fracture	RID4650
fracture fragment	fracture fragment	fracture fragment	Diagnostic Observations	LF	Fracture	Fracture	C0016658	fracture	RID4650
fractured and misaligned median sternotomy wires	fractured and misaligned median sternotomy wires	fractured and misaligned median sternotomy wires	Medical Devices	OTH	wire device	wire device	C4522306	wire	RID5453
fractured median sternotomy wires	fractured sternotomy wires	wire	Medical Devices	OTH	wire device	wire device	C4522306	wire	RID5453
fractured sternotomy wires	fractured sternotomy wires	wire	Medical Devices	OTH	wire device	wire device	C4522306	wire	RID5453
fractured wires	fractured wires	fractured wires	Medical Devices	OTH	wire device	wire device	C4522306	wire	RID5453
displaced fractures	fractures	fracture	Diseases and Disorders	PF	Fracture	Fracture	C0016658	fracture	RID4650
fractures	fractures	fracture	Diseases and Disorders	PF	Fracture	Fracture	C0016658	fracture	RID4650
healed fractures	fractures	fracture	Diseases and Disorders	PF	Fracture	Fracture	C0016658	fracture	RID4650
healed rib fractures	fractures	fracture	Diseases and Disorders	PF	Fracture	Fracture	C0016658	fracture	RID4650
healed right rib fractures	fractures	fracture	Diseases and Disorders	PF	Fracture	Fracture	C0016658	fracture	RID4650
left anterior rib fractures	fractures	fracture	Diseases and Disorders	PF	Fracture	Fracture	C0016658	fracture	RID4650
left rib fractures	fractures	fracture	Diseases and Disorders	PF	Fracture	Fracture	C0016658	fracture	RID4650
multiple rib fractures	fractures	fracture	Diseases and Disorders	PF	Fracture	Fracture	C0016658	fracture	RID4650
rib fractures	fractures	fracture	Diseases and Disorders	PF	Fracture	Fracture	C0016658	fracture	RID4650
right clavicle fractures	fractures	fracture	Diseases and Disorders	PF	Fracture	Fracture	C0016658	fracture	RID4650
right rib fractures	fractures	fracture	Diseases and Disorders	PF	Fracture	Fracture	C0016658	fracture	RID4650
right-sided rib fractures	fractures	fracture	Diseases and Disorders	PF	Fracture	Fracture	C0016658	fracture	RID4650
upper extremity fractures	fractures	fractures	Diseases and Disorders	PF	Fracture	Fracture	C0016658	fracture	RID4650
wedge fractures	fractures	fracture	Diseases and Disorders	PF	Fracture	Fracture	C0016658	fracture	RID4650
fragmentation	fragmentation	fragmentation	Diagnostic Observations	LF
fragmentation of sternal wires	fragmentation of sternal wires	fragmentation of sternal wire	Medical Devices	OTH	wire device	wire device	C4522306	wire	RID5453
abdominal free air	free air	free air	Diagnostic Observations	PF	Air (substance)	Air (substance)	C0001861	intra-abdominal	RID11106
free air	free air	free air	Diagnostic Observations	PF	Air (substance)	Air (substance)	C0001861	intra-abdominal	RID11106
free intra-abdominal air	free air	free air	Diagnostic Observations	PF	Air (substance)	Air (substance)	C0001861	intra-abdominal	RID11106
free intrabdominal air	free air	free air	Diagnostic Observations	PF	Air (substance)	Air (substance)	C0001861	intra-abdominal	RID11106
free intraperitoneal air	free air	free air	Diagnostic Observations	PF	Air (substance)	Air (substance)	C0001861	intra-abdominal	RID11106
free mediastinal air	free air	free air	Diagnostic Observations	PF	Air (substance)	Air (substance)	C0001861	intra-abdominal	RID11106
free peritoneal air	free air	free air	Diagnostic Observations	PF	Air (substance)	Air (substance)	C0001861	intra-abdominal	RID11106
intra-abdominal free air	free air	free air	Diagnostic Observations	PF	Air (substance)	Air (substance)	C0001861	intra-abdominal	RID11106
subdiaphragmatic free air	free air	free air	Diagnostic Observations	PF	Air (substance)	Air (substance)	C0001861	intra-abdominal	RID11106
subpulmonic free air	free air	free air	Diagnostic Observations	PF	Air (substance)	Air (substance)	C0001861	intra-abdominal	RID11106
free fluid	free fluid	free fluid	Diagnostic Observations	PF	Pleural fluid	Pleural fluid	C0225778	fluid	RID1547
frequent falls	frequent falls	frequent falls	Events and Incidents	Patient Info.	Falls	Falls	C0085639
frequent pneumonias	frequent pneumonias	frequent pneumonia	Diseases and Disorders	Patient Info.	Pneumonia	Pneumonia	C0032285	pneumonia	RID5350
fresh frozen plasma	fresh frozen plasma	fresh frozen plasma	Treatment and Medications	OTH	Plasma	Plasma	C0032105
frontal view	frontal view	frontal view	Procedures and Surgeries	OTH	View	View	C0449911
fsbgs	fsbgs	FSBGS	Diagnostic Observations	NCD
ftt	ftt	failure to thrive	Diseases and Disorders	Patient Info.
fullness	fullness	fullness	Diagnostic Observations	LF	Fullness	Fullness	C0439650	set of pulmonary vessels	RID49865
fullness in the right hila	fullness	fullness	Diagnostic Observations	LF	Fullness	Fullness	C0439650	set of pulmonary vessels	RID49865
fullness in the right lower tracheobronchial angle	fullness	fullness	Diagnostic Observations	LF	Fullness	Fullness	C0439650	set of pulmonary vessels	RID49865
fullness of pulmonary vessels	fullness	fullness	Diagnostic Observations	LF	Fullness	Fullness	C0439650	set of pulmonary vessels	RID49865
fullness of the pulmonary vessels	fullness	fullness	Diagnostic Observations	LF	Fullness	Fullness	C0439650	set of pulmonary vessels	RID49865
fullness of the soft tissues	fullness	fullness	Diagnostic Observations	LF	Fullness	Fullness	C0439650	set of pulmonary vessels	RID49865
fullness to the right hilum	fullness	fullness	Diagnostic Observations	LF	Fullness	Fullness	C0439650	set of pulmonary vessels	RID49865
hilar fullness	fullness	fullness	Diagnostic Observations	LF	Fullness	Fullness	C0439650	set of pulmonary vessels	RID49865
perihilar fullness	fullness	fullness	Diagnostic Observations	LF	Fullness	Fullness	C0439650	set of pulmonary vessels	RID49865
superior mediastinum fullness	fullness	fullness	Diagnostic Observations	LF	Fullness	Fullness	C0439650	set of pulmonary vessels	RID49865
fundoplication	fundoplication	fundoplication	Procedures and Surgeries	OTH	Laparoscopic Nissen Fundoplication	Laparoscopic Nissen Fundoplication	C4763916
fusion	fusion	fusion	Diagnostic Observations	PF	Fusion procedure	Fusion procedure	C1293131	fusion	RID3800
fusion hardware	fusion hardware	fusion hardware	Medical Devices	OTH	Hardware Application	Hardware Application	C1711345	fusion	RID3800
fx	fx	fracture	Diseases and Disorders	PF
rib fx	fx	fracture	Diseases and Disorders	PF
g-tube	g-tube	gastric tube	Medical Devices	OTH	gastric tube	tube, gastric	C1546658	gastric tube	RID5562
g-tube insertion	g-tube	gastric tube	Medical Devices	OTH	gastric tube	tube, gastric	C1546658	gastric tube	RID5562
gag response	gag response	gag response	Symptoms and Signs	Patient Info.	Response process	Response process	C0871261
gangrene	gangrene	gangrene	Diseases and Disorders	Patient Info.	Gangrene	Gangrene	C0017086
gas	gas	gas	Diagnostic Observations	PF
[truncated: 2,929 more rows]
