# Supplementary material
Source: ML conference proceedings conference paper supplement (https://openreview.net/forum?id=7kiL7mNrxG)
Supplement: supplementary_material [file location.xlsx]

## Sheet: location
Unnamed: 0	gpt_result	ori_loc	detail1	detail2	UMLS_normalized	normalized_loc	super category	super super category	normalized_loc_hierarchies	ori_loc_hierarchies	final_hierarchy	normalized_loc3
0	2 cm above the carina	carina	2 cm above		Structure of carina	Carina	Airways	Respiratory System	mediastinum, thorax, whole body	mediastinum, thorax, whole body	mediastinum, thorax, whole body	Respiratory > General > Specific > Carina > General
1	3 cm above the carina	carina	3 cm above		Structure of carina	Carina	Airways	Respiratory System	mediastinum, thorax, whole body	mediastinum, thorax, whole body	mediastinum, thorax, whole body	Respiratory > General > Specific > Carina > General
2	4 cm above carina	carina	4 cm above		Structure of carina	Carina	Airways	Respiratory System	mediastinum, thorax, whole body	mediastinum, thorax, whole body	mediastinum, thorax, whole body	Respiratory > General > Specific > Carina > General
3	4 cm above the carina	carina	4 cm above		Structure of carina	Carina	Airways	Respiratory System	mediastinum, thorax, whole body	mediastinum, thorax, whole body	mediastinum, thorax, whole body	Respiratory > General > Specific > Carina > General
4	5 cm above the carina	carina	5 cm above		Structure of carina	Carina	Airways	Respiratory System	mediastinum, thorax, whole body	mediastinum, thorax, whole body	mediastinum, thorax, whole body	Respiratory > General > Specific > Carina > General
5	5 cm from the carina	carina	5 cm from		Structure of carina	Carina	Airways	Respiratory System	mediastinum, thorax, whole body	mediastinum, thorax, whole body	mediastinum, thorax, whole body	Respiratory > General > Specific > Carina > General
6	6 cm from the carina	carina	6 cm from		Structure of carina	Carina	Airways	Respiratory System	mediastinum, thorax, whole body	mediastinum, thorax, whole body	mediastinum, thorax, whole body	Respiratory > General > Specific > Carina > General
7	abdomen	abdomen			Abdomen	Abdomen	Abdomen	Abdominal Structures	whole body	whole body	whole body	Respiratory > Abdominal > General
8	abdominal	abdominal			Abdomen	Abdomen	Abdomen	Abdominal Structures	whole body		whole body	Respiratory > Abdominal > General
9	abdominal aorta	abdominal aorta			Abdominal aorta structure (C0003484)	Vessels	Abdomen	Abdominal Structures		retroperitoneum, abdomen, whole body	retroperitoneum, abdomen, whole body	Respiratory > Cardiovascular > Great_Vessels > Aorta > Regions > Abdominal
10	above carina	carina	above		Structure of carina	Carina	Airways	Respiratory System	mediastinum, thorax, whole body	mediastinum, thorax, whole body	mediastinum, thorax, whole body	Respiratory > General > Specific > Carina > General
11	above right hemidiaphragmatic contour	right hemidiaphragmatic contour	above		Right hemidiaphragm	Right hemidiaphragm	Diaphragm	Abdominal Structures	thorax, whole body		thorax, whole body	Respiratory > Diaphragm > Laterality > Right
12	above the carina	carina	above		Structure of carina	Carina	Airways	Respiratory System	mediastinum, thorax, whole body	mediastinum, thorax, whole body	mediastinum, thorax, whole body	Respiratory > General > Specific > Carina > General
13	above the carinal	carinal	above		Structure of carina	Carina	Airways	Respiratory System	mediastinum, thorax, whole body		mediastinum, thorax, whole body	Respiratory > General > Specific > Carina > General
14	above the clavicle	clavicle	above		Bone structure of clavicle	Right clavicles	Clavicles	Musculoskeletal System		shoulder, upper extremity, whole body	shoulder, upper extremity, whole body	Respiratory > Musculoskeletal > Bones > Clavicle > General
15	above the clavicles	clavicles	above		Bone structure of clavicle	Right clavicles	Clavicles	Musculoskeletal System				Respiratory > Musculoskeletal > Bones > Clavicle > General
16	above the diaphragm	diaphragm	above		Entire diaphragm	Diaphragm	Diaphragm	Abdominal Structures	thorax, whole body	thorax, whole body	thorax, whole body	Respiratory > Diaphragm > General
17	above the esophagogastric junction	esophagogastric junction	above		Esophagogastric Junction							Respiratory > Abdominal > Junctions > Gastroesophageal
18	above the level of the carina	carina	above		Structure of carina	Carina	Airways	Respiratory System	mediastinum, thorax, whole body	mediastinum, thorax, whole body	mediastinum, thorax, whole body	Respiratory > General > Specific > Carina > General
19	above the level of the diaphragm	diaphragm	above		Entire diaphragm	Diaphragm	Diaphragm	Abdominal Structures	thorax, whole body	thorax, whole body	thorax, whole body	Respiratory > Diaphragm > General
20	above the minor fissure	minor fissure	above		Minor fissure	Fissure of lung	Lung	Respiratory System				Respiratory > General > Specific > Fissures > Minor > General
21	acromioclavicular joints	acromioclavicular joints			Acromioclavicular joint structure							Respiratory > Musculoskeletal > Joints > Acromioclavicular > Laterality > Bilateral
22	acromioclavicular joints bilaterally	acromioclavicular joints bilaterally			Acromioclavicular joint structure							Respiratory > Musculoskeletal > Joints > Acromioclavicular > Laterality > Bilateral
23	adjacent	adjacent			-							Respiratory > Other > Specific_Descriptions
24	adjacent lung	lung	adjacent		Lung	Lung	Lungs	Respiratory System	thorax, whole body	thorax, whole body	thorax, whole body	Respiratory > General > Lung > General
25	adjacent mediastinum	mediastinum	adjacent		Mediastinum	mediastinum				thorax, whole body	thorax, whole body	Respiratory > Mediastinum > General
26	adjacent to biapical thickening	biapical	adjacent		Apical zone of lung	Bilateral lung	Lungs	Respiratory System				Respiratory > General > Specific > Apices > Laterality > Bilateral
27	adjacent to right hilus	right hilus	adjacent		right hilum	Hilar	Lung region	Respiratory System				Respiratory > General > Specific > Hila > Laterality > Right
28	adjacent to right humeral	right humeral	adjacent		Right humerus							Respiratory > Musculoskeletal > Bones > Humerus > Laterality > Right
29	adjacent to the mediastinum on the left	left mediastinum	adjacent		Mediastinum							Respiratory > Mediastinum > Laterality > Left
30	adjacent to the right hemidiaphragm	right hemidiaphragm	adjacent		Right hemidiaphragm	Diaphragm		Abdominal Structures	thorax, whole body	thorax, whole body	thorax, whole body	Respiratory > Diaphragm > Laterality > Right
31	and third ribs on the left	ribs on the left	third		Bone structure of rib	Ribs		Musculoskeletal System				Respiratory > Musculoskeletal > Bones > Ribs > Laterality > Left
32	anterior	anterior			-							Respiratory > Other > Anatomical_Directions > Anterior
33	anterior chest	chest	anterior		Chest							Respiratory > General > Chest > General
34	anterior chest wall	chest wall	anterior		Chest wall structure	Chest				thorax, whole body	thorax, whole body	Respiratory > General > Chest > Walls > General
35	anterior lateral left-sided	anterior lateral left			-							Respiratory > Other > Anatomical_Directions > Combined
36	anterior left fourth rib	left rib	anterior fourth		Bone structure of rib	Left Ribs	Ribs	Musculoskeletal System				Respiratory > Musculoskeletal > Bones > Ribs > Laterality > Left
37	anterior left hemidiaphragm	anterior left hemidiaphragm			Structure of left hemidiaphragm	Diaphragm		Abdominal Structures	thorax, whole body		thorax, whole body	Respiratory > Diaphragm > Laterality > Left
38	anterior mediastinal	anterior mediastinal			Mediastinum							Respiratory > Mediastinum > Specific_Descriptions
39	anterior second right rib interspace	right rib interspace	anterior second		Bone structure of rib	Right rib	Ribs	Musculoskeletal System				Respiratory > Musculoskeletal > Bones > Ribs > Laterality > Right
40	anterior upper lumbar vertebral bodies	lumbar vertebral bodies	anterior upper		Structure of body of lumbar vertebra							Respiratory > Musculoskeletal > Bones > Spine > Specific_Descriptions
41	anteriorly	anteriorly			-							Respiratory > Other > Anatomical_Directions > Anterior
42	anterolateral left second rib	left rib	anterolateral second		Bone structure of rib	Left Ribs	Ribs	Musculoskeletal System				Respiratory > Musculoskeletal > Bones > Ribs > Laterality > Left
43	antrum of the stomach	stomach	antrum		Stomach structure	Stomach		Abdominal Structures	peritoneal cavity, abdomen, whole body	peritoneal cavity, abdomen, whole body	peritoneal cavity, abdomen, whole body	Respiratory > Abdominal > Organs > Stomach > General
44	aorta	aorta			Aorta	aorta				whole body	whole body	Respiratory > Cardiovascular > Great_Vessels > Aorta > General
45	aortic	aortic			Aorta							Respiratory > Cardiovascular > Great_Vessels > Aorta > General
46	aortic arch	aortic arch			Aortic arch structure	aortic arch				mediastinum, thorax, whole body	mediastinum, thorax, whole body	Respiratory > Cardiovascular > Great_Vessels > Aorta > Regions > Arch
47	aortic knob	aortic knob			aortic knob							Respiratory > Cardiovascular > Great_Vessels > Aorta > Regions > Knob
48	aortic valve	aortic valve			Aortic valve structure	aortic valve				heart, mediastinum, thorax, whole body	heart, mediastinum, thorax, whole body	Respiratory > Cardiovascular > Great_Vessels > Aorta > Regions > Valve
49	aorticopulmonary window	aorticopulmonary window			aorticopulmonary window							Respiratory > Cardiovascular > Specific_Descriptions
50	aortopulmonary window	aortopulmonary window			aortopulmonary window							Respiratory > Cardiovascular > Specific_Descriptions
51	aortopulmonic window node	aortopulmonic window			Lymph node of aortopulmonary window							Respiratory > Cardiovascular > Specific_Descriptions
52	apex	apex			Apical zone of lung	Lungs		Respiratory System				Respiratory > General > Specific > Apices > General
53	apex of the left hemi thorax	left hemithorax	apex		Hemithoracic structure	Hemithorax		Thoracic Structures				Respiratory > General > Chest > Hemithorax > Laterality > Left
54	apex of the right hemithorax	right hemithorax	apex		Hemithoracic structure	Hemithorax		Thoracic Structures				Respiratory > General > Chest > Hemithorax > Laterality > Right
55	apex of the right ventricle	right ventricle	apex		Right ventricular structure	right ventricle				heart, mediastinum, thorax, whole body	heart, mediastinum, thorax, whole body	Respiratory > Cardiovascular > Heart > Chambers > Ventricle > Laterality > Right
56	apical	apical			Apical zone of lung	Lungs		Respiratory System				Respiratory > General > Lung > Regions > Apical > General
57	apical and lateral parts of the right hemithorax	right hemithorax	apical lateral		Hemithoracic structure	Hemithorax		Thoracic Structures				Respiratory > General > Chest > Hemithorax > Laterality > Right
58	apical area	apical area			Apical zone of lung	Lungs		Respiratory System				Respiratory > General > Lung > Regions > Apical > General
59	apical areas	apical areas			Apical zone of lung	Lungs		Respiratory System				Respiratory > General > Lung > Regions > Apical > General
60	apical areas bilateral	apical areas bilateral			Apical zone of lung	Lungs		Respiratory System				Respiratory > General > Specific > Apices > Laterality > Bilateral
61	apical bilaterally	apical bilaterally			Apical zone of lung	Lungs		Respiratory System				Respiratory > General > Specific > Apices > Laterality > Bilateral
62	apices	apices			Apical zone of lung	Lungs		Respiratory System				Respiratory > General > Specific > Apices > General
63	apicolateral	apicolateral			Apical zone of lung	Lungs		Respiratory System				Respiratory > General > Specific > Apices > General
64	apicolateral parts of the right hemithorax	right hemithorax	apicolateral		Hemithoracic structure	Hemithorax		Thoracic Structures				Respiratory > General > Chest > Hemithorax > Laterality > Right
65	arch	arch			ARCH (C0741204)							Respiratory > Cardiovascular > Great_Vessels > Aorta > Regions > Arch
66	around the right lung	right lung	around		Lung	Right lung	Lungs	Respiratory System	thorax, whole body	thorax, whole body	thorax, whole body	Respiratory > General > Lung > Laterality > Right
67	at the carina	carina			Structure of carina	Airways		Respiratory System		mediastinum, thorax, whole body	mediastinum, thorax, whole body	Respiratory > General > Specific > Carina > General
68	at the gastroesophageal junction	gastroesophageal junction			gastroesophageal	gastroesophageal junction				retroperitoneum, abdomen, whole body	retroperitoneum, abdomen, whole body	Respiratory > Abdominal > Junctions > Gastroesophageal
69	at the level of the gastroesophageal junction	gastroesophageal junction			gastroesophageal	gastroesophageal junction				retroperitoneum, abdomen, whole body	retroperitoneum, abdomen, whole body	Respiratory > Abdominal > Junctions > Gastroesophageal
70	atrium	atrium			Heart Atrium							Respiratory > Cardiovascular > Heart > Chambers > Atrium > General
71	axillary	axillary			Entire axillary region							Respiratory > Other_Anatomical_Structures > Axilla > General
72	axillary left lung	axillary left lung			Entire axillary region (C1284953)	Lungs		Respiratory System				Respiratory > General > Lung > Regions > Specific_Descriptions
73	axillary left mid lung	axillary left lung	mid		Entire axillary region (C1284953)	Lungs		Respiratory System				Respiratory > General > Lung > Regions > Specific_Descriptions
74	axillary portion of the seventh right rib	right rib	axillary portion of the seventh		Bone structure of rib	Right rib	Ribs	Musculoskeletal System				Respiratory > Musculoskeletal > Bones > Ribs > Laterality > Right
75	axillary region	axillary			Entire axillary region							Respiratory > Other_Anatomical_Structures > Axilla > General
76	axillary right upper lobe	right upper lobe	axillary		Structure of upper lobe of lung	Right lung lobe	Lungs	Respiratory System				Respiratory > General > Lung > Lobes > Upper > Laterality > Right
77	axillary vein	axillary vein			Structure of axillary vein	axillary vein				shoulder, upper extremity, whole body	shoulder, upper extremity, whole body	Respiratory > Cardiovascular > Great_Vessels > Subclavian > Axillary > Vein
78	azygos and central veins	azygos vein, central veins			Structure of azygous vein && Central Vein (C1116449							Respiratory > Cardiovascular > Great_Vessels > Azygos
79	back	back			Back	back				whole body	whole body	Respiratory > Other > Anatomical_Directions > Posterior
80	basal	basal			Basal segment of lung (C0225704)	Lungs		Respiratory System				Respiratory > General > Regions > Basal > General
81	basal areas	basal			Basal segment of lung (C0225704)	Lungs		Respiratory System				Respiratory > General > Regions > Basal > General
82	basal lung regions	basal lung regions			Basal segment of lung (C0225704)	Lungs		Respiratory System				Respiratory > General > Specific > Bases > General
83	basal segments of the left lower lobe	left lower lobe	basal segments		Structure of lower lobe of lung (C1261077)	Left lung lobe	Lungs	Respiratory System				Respiratory > General > Lung > Lobes > Lower > Laterality > Left
84	basal space of the pleura	space of the pleura	basal		Pleural cavity	Pleural		Respiratory System				Respiratory > General > Specific > Pleura > Space
85	base	base			Basal segment of lung (C0225704)	Lungs		Respiratory System				Respiratory > General > Specific > Bases > General
86	base medially	base	medial		Basal segment of lung (C0225704)	Lungs		Respiratory System				Respiratory > General > Specific > Bases > General
87	base of the left	base of the left			Basal segment of lung (C0225704)	Lungs		Respiratory System				Respiratory > General > Specific > Bases > Laterality > Left
88	base of the left lung	base of the left lung			Basal segment of lung (C0225704)	Lungs		Respiratory System				Respiratory > General > Specific > Bases > Laterality > Left
89	base of the lung	base of the lung			Basal segment of lung (C0225704)	Lungs		Respiratory System				Respiratory > General > Lung > Regions > Basal > General
90	base of the lung on the right	base of the lung on the right			Basal segment of lung (C0225704)	Lungs		Respiratory System				Respiratory > General > Specific > Bases > Laterality > Right
91	base of the right hemithorax	right hemithorax	base		Hemithoracic structure	Hemithorax		Thoracic Structures				Respiratory > General > Chest > Hemithorax > Laterality > Right
92	base of the right lung	base of the right lung			Basal segment of lung (C0225704)	Lungs		Respiratory System				Respiratory > General > Specific > Bases > Laterality > Right
93	base of the right upper lobe	right upper lobe	base		Structure of upper lobe of lung	Right lung lobe	Lungs	Respiratory System				Respiratory > General > Lung > Lobes > Upper > Laterality > Right
94	base the left lung	base the left lung			Basal segment of lung (C0225704)	Lungs		Respiratory System				Respiratory > General > Specific > Bases > Laterality > Left
95	bases	bases			Basal segment of lung (C0225704)	Lungs		Respiratory System				Respiratory > General > Regions > Basal > Laterality > Bilateral
96	bases and peripheral aspects of the lung	bases of the lung	peripheral		Basal segment of lung (C0225704)	Lungs		Respiratory System				Respiratory > General > Specific > Bases > General
97	bases of the lower lobes	lower lobes	bases		Structure of lower lobe of lung	Lungs	Lungs	Respiratory System				Respiratory > General > Lung > Lobes > Lower > General
98	bases of the right upper lobe	right upper lobe	bases		Structure of upper lobe of lung	Right lung lobe	Lungs	Respiratory System				Respiratory > General > Lung > Lobes > Upper > Laterality > Right
99	basilar	basilar			Basal segment of lung (C0225704)	Lungs		Respiratory System				Respiratory > General > Regions > Basal > General
100	basilar areas	basilar			Basal segment of lung (C0225704)	Lungs		Respiratory System				Respiratory > General > Regions > Basal > General
101	basilar left lung	basilar left lung			Basal segment of lung (C0225704)	Lungs		Respiratory System				Respiratory > General > Specific > Bases > Laterality > Left
102	basilar lung	basilar lung			Basal segment of lung (C0225704)	Lungs		Respiratory System				Respiratory > General > Specific > Bases > General
103	below gastroesophageal junction	gastroesophageal junction	below		gastroesophageal	gastroesophageal junction				retroperitoneum, abdomen, whole body	retroperitoneum, abdomen, whole body	Respiratory > Abdominal > Junctions > Gastroesophageal
104	below right residual lung	right residual lung	below		Lung	Lungs	Lungs	Respiratory System				Respiratory > General > Lung > Laterality > Right
105	below the diaphragm	diaphragm	below		Entire diaphragm	Diaphragm		Abdominal Structures	thorax, whole body	thorax, whole body	thorax, whole body	Respiratory > Diaphragm > General
106	below the diaphragm into the stomach	stomach	below the diaphragm		Stomach structure	Stomach		Abdominal Structures	peritoneal cavity, abdomen, whole body	peritoneal cavity, abdomen, whole body	peritoneal cavity, abdomen, whole body	Respiratory > Abdominal > Organs > Stomach > General
107	below the diaphragms	diaphragms	below		Entire diaphragm	Diaphragm		Abdominal Structures	thorax, whole body		thorax, whole body	Respiratory > Diaphragm > General
108	below the gastroesophageal junction	gastroesophageal junction	below		gastroesophageal	gastroesophageal junction				retroperitoneum, abdomen, whole body	retroperitoneum, abdomen, whole body	Respiratory > Abdominal > Junctions > Gastroesophageal
109	below the hemidiaphragm	hemidiaphragm	below		Structure of hemidiaphragm	Diaphragm		Abdominal Structures	thorax, whole body	thorax, whole body	thorax, whole body	Respiratory > Diaphragm > General
110	below the inferior border of the right lung	right lung	below the inferior border		Lung	Right lung	Lungs	Respiratory System	thorax, whole body	thorax, whole body	thorax, whole body	Respiratory > General > Lung > Laterality > Right
111	below the left hemidiaphragm	left hemidiaphragm	below		Structure of left hemidiaphragm	Diaphragm		Abdominal Structures	thorax, whole body	thorax, whole body	thorax, whole body	Respiratory > Diaphragm > Laterality > Left
112	below the medial aspect of the right hemidiaphragm	right mid hemidiaphragm	below		Right hemidiaphragm	Diaphragm		Abdominal Structures	thorax, whole body		thorax, whole body	Respiratory > Diaphragm > Laterality > Right
113	below the right hemidiaphragm	right hemidiaphragm	below		Right hemidiaphragm	Diaphragm		Abdominal Structures	thorax, whole body	thorax, whole body	thorax, whole body	Respiratory > Diaphragm > Laterality > Right
114	below the stomach	stomach	below		Stomach structure	Stomach		Abdominal Structures	peritoneal cavity, abdomen, whole body	peritoneal cavity, abdomen, whole body	peritoneal cavity, abdomen, whole body	Respiratory > Abdominal > Organs > Stomach > General
115	below the superior aspect of the aortic knob	superior aortic knob	below									Respiratory > Cardiovascular > Great_Vessels > Aorta > Regions > Knob
116	beneath diaphragm	diaphragm	beneath		Entire diaphragm	Diaphragm		Abdominal Structures	thorax, whole body	thorax, whole body	thorax, whole body	Respiratory > Diaphragm > General
117	beneath diaphragm overlying stomach	diaphragm, stomach	beneath	overlying	Stomach structure			Abdominal Structures				Respiratory > Diaphragm > General
118	beneath left hemidiaphragm	left hemidiaphragm	beneath		Structure of left hemidiaphragm	Diaphragm		Abdominal Structures	thorax, whole body	thorax, whole body	thorax, whole body	Respiratory > Diaphragm > Laterality > Left
119	beneath the diaphragm	diaphragm	beneath		Entire diaphragm	Diaphragm		Abdominal Structures	thorax, whole body	thorax, whole body	thorax, whole body	Respiratory > Diaphragm > General
120	beneath the diaphragms	diaphragms	beneath		Entire diaphragm	Diaphragm		Abdominal Structures	thorax, whole body		thorax, whole body	Respiratory > Diaphragm > General
121	beneath the hemidiaphragms	hemidiaphragms	beneath		Structure of hemidiaphragm	Diaphragm		Abdominal Structures	thorax, whole body		thorax, whole body	Respiratory > Diaphragm > General
122	beneath the right hemidiaphragm	right hemidiaphragm	beneath		Right hemidiaphragm	Diaphragm		Abdominal Structures	thorax, whole body	thorax, whole body	thorax, whole body	Respiratory > Diaphragm > Laterality > Right
123	beyond the gastroesophageal junction	gastroesophageal junction	beyond		gastroesophageal	gastroesophageal junction				retroperitoneum, abdomen, whole body	retroperitoneum, abdomen, whole body	Respiratory > Abdominal > Junctions > Gastroesophageal
124	bi-apical	bi-apical			Basal segment of lung (C0225704)	Lungs		Respiratory System				Respiratory > General > Regions > Apical > Laterality > Bilateral
125	bi-basal	bi-basal			Basal segment of lung (C0225704)	Lungs		Respiratory System				Respiratory > Other > Relative_Positions > Bilateral
126	biapical	biapical			Apical zone of lung	Bilateral lung	Lungs	Respiratory System				Respiratory > General > Specific > Apices > Laterality > Bilateral
127	bibasal	bibasal			Basal segment of lung (C0225704)	Lungs		Respiratory System				Respiratory > General > Specific > Bases > Laterality > Bilateral
128	bibasal areas	bibasal			Basal segment of lung (C0225704)	Lungs		Respiratory System				Respiratory > General > Specific > Bases > Laterality > Bilateral
129	bibasal left	bibasal left			Basal segment of lung (C0225704)	Lungs		Respiratory System				Respiratory > General > Specific > Bases > Laterality > Bilateral
130	bibasilar	bibasilar			Basal segment of lung (C0225704)	Lungs		Respiratory System				Respiratory > General > Specific > Bases > Laterality > Bilateral
131	bibasilar regions	bibasilar			Basal segment of lung (C0225704)	Lungs		Respiratory System				Respiratory > General > Specific > Bases > Laterality > Bilateral
132	bilateral	bilateral			bilateral	Bilateral Structures		Anatomical Descriptors				Respiratory > Other > Relative_Positions > Bilateral
133	bilateral acromioclavicular joints	bilateral acromioclavicular joints			Acromioclavicular joint structure							Respiratory > Musculoskeletal > Joints > Acromioclavicular > Laterality > Bilateral
134	bilateral apical	bilateral apical			Apical zone of lung	Lungs		Respiratory System				Respiratory > General > Specific > Apices > Laterality > Bilateral
135	bilateral apical areas	bilateral apical areas			Apical zone of lung	Lungs		Respiratory System				Respiratory > General > Specific > Apices > Laterality > Bilateral
136	bilateral apical lateral	bilateral apical	lateral		Apical zone of lung	Lungs		Respiratory System				Respiratory > General > Specific > Apices > Laterality > Bilateral
137	bilateral basal	bilateral basal			Basal segment of lung (C0225704)	Lungs		Respiratory System				Respiratory > General > Specific > Bases > Laterality > Bilateral
138	bilateral basal areas	bilateral basal areas			Basal segment of lung (C0225704)	Lungs		Respiratory System				Respiratory > General > Specific > Bases > Laterality > Bilateral
139	bilateral bases	bilateral bases			Basal segment of lung (C0225704)	Lungs		Respiratory System				Respiratory > General > Specific > Bases > Laterality > Bilateral
140	bilateral basilar	bilateral basilar			Basal segment of lung (C0225704)	Lungs		Respiratory System				Respiratory > General > Specific > Bases > Laterality > Bilateral
141	bilateral basilar areas	bilateral basilar areas			Basal segment of lung (C0225704)	Lungs		Respiratory System				Respiratory > General > Specific > Bases > Laterality > Bilateral
142	bilateral bibasilar	bilateral bibasilar			Basal segment of lung (C0225704)	Lungs		Respiratory System				Respiratory > General > Regions > Basal > Laterality > Bilateral
143	bilateral chest wall	bilateral chest wall			Chest wall structure	Chest						Respiratory > General > Chest > Walls > Laterality > Bilateral
144	bilateral costophrenic angles	bilateral costophrenic angles			Costophrenic angle	Costophrenic angle		Adjacent Structures				Respiratory > General > Specific > Costophrenic_Angles > Laterality > Bilateral
145	bilateral costophrenic sinuses	bilateral costophrenic sinuses			Costophrenic angle	Costophrenic angle		Adjacent Structures				Respiratory > General > Specific > Costophrenic_Angles > Laterality > Bilateral
146	bilateral dorsal costophrenic sinuses	bilateral costophrenic sinuses			Costophrenic angle	Costophrenic angle		Adjacent Structures				Respiratory > General > Specific > Costophrenic_Angles > Laterality > Bilateral
147	bilateral glenohumeral joints	bilateral glenohumeral joints			Entire glenohumeral joint	Joints		Musculoskeletal System				Respiratory > Musculoskeletal > Joints > Glenohumeral > Laterality > Bilateral
148	bilateral hila	bilateral hila			Hilar	Lung region		Respiratory System				Respiratory > General > Specific > Hila > Laterality > Bilateral
149	bilateral hilar	bilateral hilar			Hilar	Lung region		Respiratory System				Respiratory > General > Specific > Hila > Laterality > Bilateral
150	bilateral hilar and mediastinal	bilateral hilar, mediastinal			Hilar && Mediastinum							Respiratory > General > Specific > Hila > Specific_Descriptions
151	bilateral hilar regions	bilateral hilar regions			Hilar	Lung region		Respiratory System				Respiratory > General > Specific > Hila > Laterality > Bilateral
152	bilateral left upper lobe	bilateral left upper lobe			Structure of upper lobe of lung	Lungs		Respiratory System				Respiratory > General > Lobes > Upper > Laterality > Bilateral
153	bilateral lobes of the lung	bilateral lobes of the lung			Structure of lobe of lung	Lungs		Respiratory System				Respiratory > General > Lobes > Combined > Laterality > Bilateral
154	bilateral lower extremity	bilateral lower extremity			Lower Extremity	Extremities		Extremities				Respiratory > Other_Anatomical_Structures > Extremities > Lower > Laterality > Bilateral
155	bilateral lower lobe	bilateral lower lobe			Structure of lower lobe of lung	Bilateral lung	Lungs	Respiratory System				Respiratory > General > Lobes > Lower > Laterality > Bilateral
156	bilateral lower lobes	bilateral lower lobes			Structure of lower lobe of lung	Bilateral lung	Lungs	Respiratory System				Respiratory > General > Lobes > Lower > Laterality > Bilateral
157	bilateral lower lung	bilateral lower lung			lower lung	Lungs		Respiratory System				Respiratory > General > Zones > Lower > Laterality > Bilateral
158	bilateral lower lung bases	bilateral lower lung	bases		lower lung	Lungs		Respiratory System				Respiratory > General > Zones > Lower > Laterality > Bilateral
159	bilateral lower lungs	bilateral lower lungs			lower lung	Lungs		Respiratory System				Respiratory > General > Zones > Lower > Laterality > Bilateral
160	bilateral lower zone	bilateral lower zone			Lower zone	Lungs		Respiratory System				Respiratory > General > Zones > Lower > Laterality > Bilateral
161	bilateral lower zones	bilateral lower zones			Lower zone	Lungs		Respiratory System				Respiratory > General > Zones > Lower > Laterality > Bilateral
162	bilateral lung	bilateral lung			Lung	Lungs		Respiratory System				Respiratory > General > Lung > Laterality > Bilateral
163	bilateral lung apices	bilateral lung apices			Apical zone of lung	Lungs		Respiratory System				Respiratory > General > Specific > Apices > Laterality > Bilateral
164	bilateral lung base	bilateral lung base			Basal segment of lung (C0225704)	Lungs		Respiratory System				Respiratory > General > Lung > Regions > Basal > Laterality > Bilateral
165	bilateral lung bases	bilateral lung bases			Basal segment of lung (C0225704)	Lungs		Respiratory System				Respiratory > General > Lung > Regions > Basal > Laterality > Bilateral
166	bilateral lung basis	bilateral lung basis			Basal segment of lung (C0225704)	Lungs		Respiratory System				Respiratory > General > Lung > Regions > Basal > Laterality > Bilateral
167	bilateral lung fields	bilateral lung fields			Lung	Lungs		Respiratory System				Respiratory > General > Lung > Laterality > Bilateral
168	bilateral lungs	bilateral lungs			Lung	Lungs		Respiratory System				Respiratory > General > Lung > Laterality > Bilateral
169	bilateral medial upper lobes	bilateral medial lobes	upper		Structure of middle lobe of lung	Lungs		Respiratory System				Respiratory > General > Lobes > Middle > Laterality > Bilateral
170	bilateral mid lung	bilateral mid lung			Middle zone of lung (C0559287)	Lungs		Respiratory System				Respiratory > General > Zones > Middle > Laterality > Bilateral
171	bilateral mid-to-upper lungs	bilateral lungs	mid-to-upper		Lung	Lungs		Respiratory System				Respiratory > General > Lung > Laterality > Bilateral
172	bilateral middle lobe	bilateral middle lobe			Structure of middle lobe of lung	Lungs		Respiratory System				Respiratory > General > Lung > Lobes > Middle > Laterality > Bilateral
173	bilateral perihilar	bilateral perihilar			Structure of perihilar region of lung	Lung region		Respiratory System				Respiratory > General > Specific > Perihilar > Laterality > Bilateral
174	bilateral perihilar areas	bilateral perihilar areas			Structure of perihilar region of lung	Lung region		Respiratory System				Respiratory > General > Specific > Perihilar > Laterality > Bilateral
175	bilateral pleural space	bilateral pleural space			Pleural cavity	Pleural		Respiratory System				Respiratory > General > Specific > Pleura > Laterality > Bilateral
176	bilateral posterior	bilateral	posterior		bilateral	Bilateral Structures		Anatomical Descriptors				Respiratory > Other > Relative_Positions > Bilateral
177	bilateral posterior costophrenic sulcus	bilateral costophrenic sulcus	posterior		Costophrenic angle	Costophrenic angle		Adjacent Structures				Respiratory > General > Specific > Costophrenic_Angles > Laterality > Bilateral
178	bilateral pulmonary hila	bilateral pulmonary hila			Hilar	Lung region		Respiratory System				Respiratory > General > Specific > Hila > Laterality > Bilateral
179	bilateral right predominant	bilateral	right predominant		bilateral	Bilateral Structures		Anatomical Descriptors				Respiratory > Other > Relative_Positions > Bilateral
180	bilateral shoulder	bilateral shoulder			Shoulder	Shoulder		Adjacent Structures	upper extremity, whole body		upper extremity, whole body	Respiratory > Musculoskeletal > Joints > Shoulder > Laterality > Bilateral
181	bilateral shoulders	bilateral shoulders			Shoulder	Shoulder		Adjacent Structures	upper extremity, whole body		upper extremity, whole body	Respiratory > Musculoskeletal > Joints > Shoulder > Laterality > Bilateral
182	bilateral supraclavicular region	bilateral supraclavicular region			supraclavicular region			Adjacent Structures				Respiratory > Other_Anatomical_Structures > Supraclavicular > Laterality > Bilateral
183	bilateral upper lobe	bilateral upper lobe			Structure of upper lobe of lung	Lungs		Respiratory System				Respiratory > General > Lobes > Upper > Laterality > Bilateral
184	bilateral upper lobes	bilateral upper lobes			Structure of upper lobe of lung	Lungs		Respiratory System				Respiratory > General > Lobes > Upper > Laterality > Bilateral
185	bilateral upper lung	bilateral upper lung			Upper zone of lung (C0559286)	Bilateral lungs	Lungs	Respiratory System				Respiratory > General > Zones > Upper > Laterality > Bilateral
186	bilateral upper lung zone	bilateral upper lung zone			Upper zone of lung (C0559286)	Bilateral lungs	Lungs	Respiratory System				Respiratory > General > Zones > Upper > Laterality > Bilateral
187	bilateral upper lungs	bilateral upper lungs			Upper zone of lung (C0559286)	Bilateral lungs	Lungs	Respiratory System				Respiratory > General > Zones > Upper > Laterality > Bilateral
188	bilateral upper lungs lateral	bilateral upper lungs	lateral		Upper zone of lung (C0559286)	Bilateral lungs	Lungs	Respiratory System				Respiratory > General > Zones > Upper > Laterality > Bilateral
189	bilateral upper lungs zone	bilateral upper lungs zone			Upper zone of lung (C0559286)	Bilateral lungs	Lungs	Respiratory System				Respiratory > General > Zones > Upper > Laterality > Bilateral
190	bilaterally	bilaterally			bilateral	Bilateral Structures		Anatomical Descriptors				Respiratory > Other > Relative_Positions > Bilateral
191	biventricular	biventricular			Heart Ventricle							Respiratory > Cardiovascular > Heart > Chambers > Ventricle > General
192	bodies of the esophagus	esophagus	bodies		Esophagus	esophagus				mediastinum, thorax, whole body	mediastinum, thorax, whole body	Respiratory > Abdominal > Organs > Esophagus > General
193	bodies of the stomach	bodies of the stomach			Body of stomach (C0227230)	Stomach	Stomach	Abdominal Structures	peritoneal cavity, abdomen, whole body		peritoneal cavity, abdomen, whole body	Respiratory > Abdominal > Organs > Stomach > General
194	brachiocephalic	brachiocephalic			Structure of brachiocephalic artery							Respiratory > Cardiovascular > Great_Vessels > Brachiocephalic > General
195	brachiocephalic vein	brachiocephalic vein			Structure of brachiocephalic vein	brachiocephalic vein				thorax, whole body	thorax, whole body	Respiratory > Cardiovascular > Great_Vessels > Brachiocephalic > Vein > General
196	bronchi	bronchi			Bronchi	Airways		Respiratory System				Respiratory > General > Specific > Bronchi > General
197	c spine	c-spine			Cervical spine	spine		Skeletal System	whole body		whole body	Respiratory > Musculoskeletal > Bones > Spine > Cervical
198	c-spine	c-spine			Cervical spine	spine		Skeletal System	whole body		whole body	Respiratory > Musculoskeletal > Bones > Spine > Cervical
199	cardiac	cardiac			Heart							Respiratory > Cardiovascular > Heart > General
200	cardiac apex	cardiac apex			Structure of apex of heart							Respiratory > Cardiovascular > Heart > Regions > Apex > General
201	cardiac apex at the left base	cardiac apex	left base		Structure of apex of heart							Respiratory > Cardiovascular > Heart > Regions > Apex > General
202	cardiac silhouette	cardiac silhouette			Cardiac border							Respiratory > Cardiovascular > Heart > Specific_Descriptions
203	cardiomediastinal silhouette	cardiomediastinal silhouette			Mediastinum							Respiratory > Cardiovascular > Heart > Specific_Descriptions
204	cardiophrenic regions	cardiophrenic			-							Respiratory > Cardiovascular > Heart > Regions > Cardiophrenic
205	carina	carina			Structure of carina	Airways		Respiratory System		mediastinum, thorax, whole body	mediastinum, thorax, whole body	Respiratory > General > Specific > Carina > General
206	carinal angle	carinal angle			Structure of carina	Airways		Respiratory System				Respiratory > General > Specific > Carina > General
207	cavoatrial junction	cavoatrial junction			cavoatrial junction							Respiratory > Cardiovascular > Great_Vessels > Vena_Cava > Superior > Junctions
208	cavoatrial junction/proximal right atrium	cavoatrial junction, right atrium		proximal	cavoatrial junction && Right atrial structure							Respiratory > Cardiovascular > Great_Vessels > Vena_Cava > Superior > Junctions
209	cavoatrial/right atrial junction	cavoatrial/right atrial junction			cavoatrial junction && Right atrial structure							Respiratory > Cardiovascular > Great_Vessels > Vena_Cava > Superior > Junctions
210	central	central			-							Respiratory > Other > Relative_Positions > Central
211	central bilateral	bilateral	central		bilateral	Bilateral Structures		Anatomical Descriptors				Respiratory > Other > Relative_Positions > Bilateral
212	central lymph nodes	lymph nodes	central		lymph nodes							Respiratory > Lymphatic > Nodes
213	central parts of the stomach	stomach	central		Stomach structure	Stomach		Abdominal Structures	peritoneal cavity, abdomen, whole body	peritoneal cavity, abdomen, whole body	peritoneal cavity, abdomen, whole body	Respiratory > Abdominal > Organs > Stomach > General
214	central portion of the pulmonary artery	pulmonary artery	central		Pulmonary artery structure	pulmonary artery				mediastinum, thorax, whole body	mediastinum, thorax, whole body	Respiratory > Cardiovascular > Great_Vessels > Pulmonary > Arteries
215	central pulmonary vasculature	pulmonary vasculature	central		Pulmonary vessels							Respiratory > General > Lung > Pulmonary_Vasculature > General
216	central right hilar region	right hilar region	central		right hilum	Hilar	Lung region	Respiratory System				Respiratory > General > Specific > Hila > Laterality > Right
217	central within each lung	each lung	central		Lung	Lungs		Respiratory System				Respiratory > General > Lung > Laterality > Bilateral
218	centrally	centrally			-							Respiratory > Other > Relative_Positions > Central
219	cervical	cervical			Neck							Respiratory > Musculoskeletal > Bones > Spine > Cervical
220	cervical and thoracic right-sided	right cervical, right thoracic			Cervical region (surface region of back) && Thoracic region (surface region of back)							Respiratory > Other > Relative_Positions > Right
221	cervical esophagus	esophagus	cervical		Esophagus	esophagus				mediastinum, thorax, whole body	mediastinum, thorax, whole body	Respiratory > Abdominal > Organs > Esophagus > General
222	cervical spine	cervical spine			Cervical spine	spine		Skeletal System	whole body		whole body	Respiratory > Musculoskeletal > Bones > Spine > Cervical
223	cervical trachea	trachea	cervical		Trachea	Trachea	Airways	Respiratory System	mediastinum, thorax, whole body	mediastinum, thorax, whole body	mediastinum, thorax, whole body	Respiratory > General > Specific > Trachea > General
224	chest	chest			Chest							Respiratory > General > Chest > General
225	chest cage	chest cage			Chest & Cage Observation C5237709							Respiratory > General > Chest > General
226	chest lateral wall	chest wall	lateral		Chest wall structure	chest wall				thorax, whole body	thorax, whole body	Respiratory > General > Chest > Walls > General
227	chest wall	chest wall			Chest wall structure	Chest				thorax, whole body	thorax, whole body	Respiratory > General > Chest > Walls > General
228	chest wall and the liver	chest wall, liver			Chest wall structure && Liver	Chest						Respiratory > General > Chest > General
229	chest wall regions	chest wall			Chest wall structure	Chest				thorax, whole body	thorax, whole body	Respiratory > General > Chest > Walls > General
230	chest walls bilaterally	chest walls bilaterally			Chest wall structure	Chest						Respiratory > General > Chest > Walls > Laterality > Bilateral
231	colon	colon			Colon structure (body structure)							Respiratory > Abdominal > Organs > Intestines > Large > Colon > General
232	confluence of the brachiocephalic vein	brachiocephalic vein	confluence		Structure of brachiocephalic vein	brachiocephalic vein				thorax, whole body	thorax, whole body	Respiratory > Cardiovascular > Great_Vessels > Brachiocephalic > Vein > General
233	confluence of the brachiocephalic veins	confluence of the brachiocephalic veins			Structure of brachiocephalic vein							Respiratory > Cardiovascular > Great_Vessels > Brachiocephalic > Junctions
234	confluence of the left first anterior rib with the left fifth posterior rib	confluence of the left first anterior rib with the left fifth posterior rib			Rib Confluences	Ribs		Musculoskeletal System				Respiratory > Musculoskeletal > Bones > Ribs > Specific_Descriptions
235	coronary arteries	coronary arteries			Coronary artery							Respiratory > Cardiovascular > Great_Vessels > Coronary > General
236	coronary sinus	coronary sinus			Coronary sinus structure	coronary sinus				heart, mediastinum, thorax, whole body	heart, mediastinum, thorax, whole body	Respiratory > Cardiovascular > Great_Vessels > Coronary > Specific
237	coronary sinus system	coronary sinus system			Coronary sinus structure							Respiratory > Cardiovascular > Great_Vessels > Coronary > Specific
238	coronary vessels	coronary vessels			Coronary Vessels							Respiratory > Cardiovascular > Great_Vessels > Coronary > General
239	costochondral junction	costochondral junction			Entire costochondral junction							Respiratory > Musculoskeletal > Bones > Ribs > Specific_Descriptions
240	costodiaphragmatic angles	costodiaphragmatic angles			Costophrenic angle (C0230151)							Respiratory > Other_Anatomical_Structures > Specific_Descriptions
241	costophrenic angle	costophrenic angle			Costophrenic angle							Respiratory > General > Specific > Costophrenic_Angles > General
242	costophrenic angles	costophrenic angles			Costophrenic angle							Respiratory > General > Specific > Costophrenic_Angles > General
243	crosses the midline	midline			-							Respiratory > Other > Relative_Positions > Midline
244	descending aorta	descending aorta			Descending aorta							Respiratory > Cardiovascular > Great_Vessels > Aorta > Regions > Descending
245	descending thoracic aorta	descending thoracic aorta			Descending thoracic aorta	descending thoracic aorta				mediastinum, thorax, whole body	mediastinum, thorax, whole body	Respiratory > Cardiovascular > Great_Vessels > Aorta > Regions > Descending
246	diaphragm	diaphragm			Entire diaphragm	Diaphragm		Abdominal Structures	thorax, whole body	thorax, whole body	thorax, whole body	Respiratory > Diaphragm > General
247	diaphragmatic surfaces	diaphragmatic surfaces			Entire diaphragm	Diaphragm		Abdominal Structures	thorax, whole body		thorax, whole body	Respiratory > Diaphragm > Surfaces
248	diaphysis of the right proximal humerus	diaphysis of the right proximal humerus			Proximal part of diaphysis of right humerus							Respiratory > Musculoskeletal > Bones > Humerus > Position > Specific_Descriptions
249	distal	distal			-							Respiratory > Other > Anatomical_Directions > Distal
250	distal bodies of the stomach	bodies of the stomach	distal		Body of stomach (C0227230)	Stomach	Stomach	Abdominal Structures	peritoneal cavity, abdomen, whole body		peritoneal cavity, abdomen, whole body	Respiratory > Abdominal > Organs > Stomach > General
251	distal duodenum/proximal jejunum	duodenum, jejunum	distal	proximal	Duodenum && Jejunum							Respiratory > Abdominal > Organs > Intestines > Small > Jejunum
252	distal esophagus	esophagus	distal		Esophagus	esophagus				mediastinum, thorax, whole body	mediastinum, thorax, whole body	Respiratory > Abdominal > Organs > Esophagus > General
253	distal left brachiocephalic vein	left brachiocephalic vein	distal		Left brachiocephalic vein	left brachiocephalic vein				thorax, whole body	thorax, whole body	Respiratory > Cardiovascular > Great_Vessels > Brachiocephalic > Vein > Laterality > Left
254	distal right clavicle	right clavicle	distal		Bone structure of clavicle	Clavicles		Musculoskeletal System		right shoulder, right upper extremity, whole body	right shoulder, right upper extremity, whole body	Respiratory > Musculoskeletal > Bones > Clavicle > Laterality > Right
255	distal right interlobar pulmonary artery	right interlobar pulmonary artery	distal		Interlobar part of right pulmonary artery							Respiratory > Cardiovascular > Great_Vessels > Pulmonary > Arteries
256	distal right pulmonary artery	right pulmonary artery	distal		Right pulmonary artery	right pulmonary artery				mediastinum, thorax, whole body	mediastinum, thorax, whole body	Respiratory > Cardiovascular > Great_Vessels > Pulmonary > Arteries
257	distal stomach	stomach	distal		Stomach structure	Stomach		Abdominal Structures	peritoneal cavity, abdomen, whole body	peritoneal cavity, abdomen, whole body	peritoneal cavity, abdomen, whole body	Respiratory > Abdominal > Organs > Stomach > General
258	distal superior vena cava	superior vena cava	distal		Superior vena cava structure	superior vena cava				mediastinum, thorax, whole body	mediastinum, thorax, whole body	Respiratory > Cardiovascular > Great_Vessels > Vena_Cava > Superior > General
259	distal svc	svc	distal		Superior vena cava structure							Respiratory > Cardiovascular > Great_Vessels > Vena_Cava > Superior > General
260	distal svc/cavoatrial junction	svc/cavoatrial junction	distal		Superior vena cava structure && cavoatrial junction							Respiratory > Cardiovascular > Great_Vessels > Vena_Cava > Superior > Junctions
261	distal to the catheter tip	distal to the catheter tip										Respiratory > Other > Imaging_Descriptions
262	distally	distally			-							Respiratory > Other > Anatomical_Directions > Distal
263	dome of the left hemidiaphragm over the cardiac silhouette	dome of the left hemidiaphragm	over the cardiac silhouette		Structure of left hemidiaphragm	Diaphragm		Abdominal Structures	thorax, whole body		thorax, whole body	Respiratory > Diaphragm > Laterality > Left
264	dorsal	dorsal			Dorsum/Dorsal							Respiratory > Other > Anatomical_Directions > Posterior
265	dorsal parts of the costophrenic sinus	costophrenic sinus	dorsal parts		Costophrenic angle							Respiratory > General > Specific > Costophrenic_Angles > General
266	duodenum	duodenum			Duodenum	duodenum				retroperitoneum, abdomen, whole body	retroperitoneum, abdomen, whole body	Respiratory > Abdominal > Organs > Intestines > Small > Duodenum
267	each lung	each lung			Lung	Lungs		Respiratory System				Respiratory > General > Lung > Laterality > Bilateral
268	eighth posterolateral rib on the right	rib on the right	eighth posterolateral		Bone structure of rib	Ribs		Musculoskeletal System				Respiratory > Musculoskeletal > Bones > Ribs > Laterality > Right
269	either lung	either lung			Lung	Lungs		Respiratory System				Respiratory > General > Lung > Laterality > Bilateral
270	either side	either side			Bilateral lungs							Respiratory > Other > Specific_Descriptions
271	entrance of the pleural cavity	pleural cavity			Pleural cavity	Pleural		Respiratory System				Respiratory > General > Specific > Pleura > Space
272	epigastric	epigastric			Epigastrium							Respiratory > Abdominal > Regions > Epigastric
273	epigastric abdomen	epigastric abdomen			Epigastrium	Abdomen		Abdominal Structures	whole body		whole body	Respiratory > Abdominal > Regions > Epigastric
274	epigastric area	epigastric area			Epigastrium							Respiratory > Abdominal > Regions > Epigastric
275	epigastric region	epigastric region			Epigastrium							Respiratory > Abdominal > Regions > Epigastric
276	epigastrium	epigastrium			Epigastrium							Respiratory > Abdominal > Regions > Epigastric
277	esophagogastric junction	esophagogastric junction			Esophagogastric Junction							Respiratory > Abdominal > Junctions > Gastroesophageal
278	esophagus	esophagus			Esophagus	esophagus				mediastinum, thorax, whole body	mediastinum, thorax, whole body	Respiratory > Abdominal > Organs > Esophagus > General
279	esophagus at the level of the clavicles	esophagus	level of the clavicles		Esophagus	Esophagus		Adjacent Structures	mediastinum, thorax, whole body	mediastinum, thorax, whole body	mediastinum, thorax, whole body	Respiratory > Abdominal > Organs > Esophagus > General
280	extreme left	extreme left			Extremity Left							Respiratory > Other > Specific_Descriptions
281	femoral	femoral			Femur							Respiratory > Other_Anatomical_Structures > Specific_Descriptions
282	first and fourth rib	rib	first	fourth	Bone structure of rib	Ribs	Ribs	Musculoskeletal System				Respiratory > Musculoskeletal > Bones > Ribs > General
283	first left	left			-							Respiratory > Other > Relative_Positions > Left
284	first portion of the duodenum	duodenum	first		Duodenum	duodenum				retroperitoneum, abdomen, whole body	retroperitoneum, abdomen, whole body	Respiratory > Abdominal > Organs > Intestines > Small > Duodenum
285	fissural	fissural			Fissure of lung							Respiratory > General > Specific > Fissures > General
286	fissural surfaces	fissural surfaces			Fissural surface of lobe of lung							Respiratory > General > Specific > Fissures > General
287	fissure	fissure			Fissure of lung	Fissure of lung	Lung	Respiratory System				Respiratory > General > Specific > Fissures > General
288	fissure of the left lung	fissure of the left lung			Fissure of lung	Lungs		Respiratory System				Respiratory > General > Specific > Fissures > Laterality > Left
289	fissures	fissures			Fissure of lung	Fissure of lung	Lung	Respiratory System				Respiratory > General > Specific > Fissures > General
290	flank	flank			Flank (surface region)							Respiratory > Abdominal > Regions > Flank > General
291	fractured vertebral bodies	vertebral bodies			Body of vertebra							Respiratory > Musculoskeletal > Bones > Spine > Vertebrae > General
292	from the left pectoral generator	left pectoral generator			-							Respiratory > Other > Relative_Positions > Left
293	from the level of the carina upwards towards the	carina	upwards		Structure of carina	Airways		Respiratory System		mediastinum, thorax, whole body	mediastinum, thorax, whole body	Respiratory > General > Specific > Carina > General
294	frontal and of the chest	frontal chest			Chest							Respiratory > Other > Specific_Descriptions
295	fundus	fundus			Fundus							Respiratory > Abdominal > Organs > Stomach > Regions > Fundus
296	fundus and bodies of the stomach	fundus of the stomach, bodies of the stomach			gastric fundus (C0017129) && Body of stomach (C0227230)	Stomach	Stomach	Abdominal Structures	peritoneal cavity, abdomen, whole body		peritoneal cavity, abdomen, whole body	Respiratory > Abdominal > Organs > Stomach > Regions > Specific_Descriptions
297	fundus of the stomach	fundus of the stomach			gastric fundus (C0017129)							Respiratory > Abdominal > Organs > Stomach > Regions > Fundus
298	gastric fundus	gastric fundus			gastric fundus	gastric fundus				peritoneal cavity, abdomen, whole body	peritoneal cavity, abdomen, whole body	Respiratory > Abdominal > Organs > Stomach > Regions > Fundus
299	gastric remnant	gastric remnant			Gastric Stump							Respiratory > Abdominal > Organs > Stomach > Specific_Descriptions
300	gastroesophageal junction	gastroesophageal junction			gastroesophageal	gastroesophageal junction				retroperitoneum, abdomen, whole body	retroperitoneum, abdomen, whole body	Respiratory > Abdominal > Junctions > Gastroesophageal
301	gastroesophageal junction level	gastroesophageal junction			gastroesophageal	gastroesophageal junction				retroperitoneum, abdomen, whole body	retroperitoneum, abdomen, whole body	Respiratory > Abdominal > Junctions > Gastroesophageal
302	glenohumeral and acromioclavicular joints	glenohumeral joint, acromioclavicular joint			Entire glenohumeral joint && Acromioclavicular joint structure							Respiratory > Musculoskeletal > Joints > Specific_Descriptions
303	glenohumeral joints	glenohumeral joints			Entire glenohumeral joint							Respiratory > Musculoskeletal > Joints > Glenohumeral > Laterality > Bilateral
304	glenohumeral joints bilaterally	glenohumeral joints bilaterally			Entire glenohumeral joint	Joints		Musculoskeletal System				Respiratory > Musculoskeletal > Joints > Glenohumeral > Laterality > Bilateral
305	glenoid	glenoid			Glenoid structure							Respiratory > Musculoskeletal > Joints > Glenoid > General
306	greater tuberosity of the left humerus	left humerus	greater tuberosity		Left humerus	left humerus				left arm, left upper extremity, whole body	left arm, left upper extremity, whole body	Respiratory > Musculoskeletal > Bones > Humerus > Laterality > Left
307	heart	heart			Heart	heart				mediastinum, thorax, whole body	mediastinum, thorax, whole body	Respiratory > Cardiovascular > Heart > General
308	hemidiaphragm	hemidiaphragm			Structure of hemidiaphragm	Diaphragm		Abdominal Structures	thorax, whole body	thorax, whole body	thorax, whole body	Respiratory > Diaphragm > General
309	hemithorax	hemithorax			Hemithoracic structure	Hemithorax		Thoracic Structures				Respiratory > General > Chest > Hemithorax > General
310	high svc	svc	high		Superior vena cava structure							Respiratory > Cardiovascular > Great_Vessels > Vena_Cava > Superior > General
311	hila	hila			Hilar	Lung region		Respiratory System				Respiratory > General > Specific > Hila > General
312	hila bilaterally	hila bilaterally			Hilar	Lung region		Respiratory System				Respiratory > General > Specific > Hila > Laterality > Bilateral
313	hilar	hilar			Hilar	Lung region		Respiratory System				Respiratory > General > Specific > Hila > General
314	hilar and mediastinal	hilar, mediastinal			Hilar && Mediastinum							Respiratory > General > Specific > Hila > Specific_Descriptions
315	hilar and mediastinal border	hilar border, mediastinal border			Hilar && Mediastinum							Respiratory > Mediastinum > Specific_Descriptions
316	hilar areas	hilar			Hilar	Lung region		Respiratory System				Respiratory > General > Specific > Hila > General
317	hilar region	hilar			Hilar	Lung region		Respiratory System				Respiratory > General > Specific > Hila > General
318	imaged pleural surfaces	pleural surfaces			Pleura	Pleural		Respiratory System				Respiratory > General > Specific > Pleura > Surfaces
319	imaged portion of the chest	chest			Chest							Respiratory > General > Chest > General
320	in the lungs	lungs			Lung	Lung	Lungs	Respiratory System	thorax, whole body		thorax, whole body	Respiratory > General > Lung > General
321	inferior	inferior			-							Respiratory > Other > Anatomical_Directions > Inferior
322	inferior border of the right lung	right lung	inferior border		Lung	Right lung	Lungs	Respiratory System	thorax, whole body	thorax, whole body	thorax, whole body	Respiratory > General > Lung > Laterality > Right
323	inferior cavoatrial junction	cavoatrial junction	inferior		cavoatrial junction							Respiratory > Cardiovascular > Great_Vessels > Vena_Cava > Superior > Junctions
324	inferior clavicular heads	clavicular heads	inferior		Bone structure of clavicle	Clavicles		Musculoskeletal System				Respiratory > Musculoskeletal > Bones > Clavicle > Specific_Descriptions
325	inferior lingula	lingula	inferior		Lingula	lingula				left lung, thorax, whole body	left lung, thorax, whole body	Respiratory > General > Zones > Lingula
326	inferior right chest	inferior right chest			Right side of chest	Chest						Respiratory > Other > Anatomical_Directions > Inferior
327	inferior scapula	inferior scapula			Inferior part of body of scapula							Respiratory > Musculoskeletal > Bones > Scapula > Position > Inferior
328	inferior scapulae	inferior scapulae			Inferior part of body of scapula							Respiratory > Musculoskeletal > Bones > Scapula > Position > Inferior
329	inferior to the central lungs	lungs	inferior to the central		Lung	Lung	Lungs	Respiratory System	thorax, whole body		thorax, whole body	Respiratory > General > Lung > General
330	inferior to the diaphragm	diaphragm	inferior		Entire diaphragm	Diaphragm		Abdominal Structures	thorax, whole body	thorax, whole body	thorax, whole body	Respiratory > Diaphragm > General
331	inferior vena cava	inferior vena cava			Inferior vena cava structure	inferior vena cava				retroperitoneum, abdomen, whole body	retroperitoneum, abdomen, whole body	Respiratory > Cardiovascular > Great_Vessels > Vena_Cava > Inferior
332	inferiorly	inferiorly			-							Respiratory > Other > Anatomical_Directions > Inferior
333	inferolateral right upper lobe	right upper lobe	inferolateral		Structure of upper lobe of lung	Right lung lobe	Lungs	Respiratory System				Respiratory > General > Lung > Lobes > Upper > Laterality > Right
334	infraclavicular junction	infraclavicular junction			Infraclavicular region structure							Respiratory > Other_Anatomical_Structures > Specific_Descriptions
335	infrahilar area	infrahilar			Hilar							Respiratory > General > Specific > Infrahilar > General
336	infrahilar left lower lobe	left lower lobe	infrahilar		Structure of lower lobe of lung (C1261077)	Left lung lobe	Lungs	Respiratory System				Respiratory > General > Lung > Lobes > Lower > Laterality > Left
337	infrahilar portions of bilateral lower lobes	bilateral lower lobes	infrahilar		Structure of lower lobe of lung	Bilateral lung	Lungs	Respiratory System				Respiratory > General > Lobes > Lower > Laterality > Bilateral
338	infrahilar region	infrahilar			Hilar							Respiratory > General > Specific > Infrahilar > General
339	infrahilar right lung	right lung	infrahilar		Lung	Right lung	Lungs	Respiratory System	thorax, whole body	thorax, whole body	thorax, whole body	Respiratory > General > Lung > Laterality > Right
340	inner	inner			-							Respiratory > Other > Specific_Descriptions
341	interstitial	interstitial										Respiratory > General > Lung > Regions > Interstitial > General
342	interstitium	interstitium										Respiratory > General > Lung > Regions > Interstitial > General
343	into the distal stomach	stomach	distal		Stomach structure	Stomach		Abdominal Structures	peritoneal cavity, abdomen, whole body	peritoneal cavity, abdomen, whole body	peritoneal cavity, abdomen, whole body	Respiratory > Abdominal > Organs > Stomach > General
344	into the stomach	stomach			Stomach structure	Stomach		Abdominal Structures	peritoneal cavity, abdomen, whole body	peritoneal cavity, abdomen, whole body	peritoneal cavity, abdomen, whole body	Respiratory > Abdominal > Organs > Stomach > General
345	intra-abdominal	intra-abdominal			Abdomen	Abdomen		Abdominal Structures	whole body		whole body	Respiratory > Abdominal > General
346	intrafissural right pleural	right pleural	intrafissural		Right pleura	Pleural		Respiratory System				Respiratory > General > Specific > Pleura > Laterality > Right
347	intrathoracic	intrathoracic			Intrathoracic organ							Respiratory > Other > Specific_Descriptions
348	ipsilateral lung	lung	ipsilateral		Lung	Lung	Lungs	Respiratory System	thorax, whole body	thorax, whole body	thorax, whole body	Respiratory > General > Lung > General
349	ivc	ivc			Inferior vena cava structure							Respiratory > Cardiovascular > Great_Vessels > Vena_Cava > Inferior
350	junction of brachiocephalic vein and svc	junction of brachiocephalic vein and svc			Structure of brachiocephalic vein && Superior vena cava structure && Anatomical junction							Respiratory > Cardiovascular > Great_Vessels > Brachiocephalic > Junctions
351	junction of brachiocephalic veins	junction of brachiocephalic veins			Structure of brachiocephalic vein							Respiratory > Cardiovascular > Great_Vessels > Brachiocephalic > Junctions
352	junction of left brachiocephalic vein and svc	junction of left brachiocephalic vein and svc			Structure of brachiocephalic vein && Superior vena cava structure && Anatomical junction							Respiratory > Cardiovascular > Great_Vessels > Brachiocephalic > Junctions
353	junction of the brachiocephalic trunk	junction of the brachiocephalic trunk			Trunk of brachiocephalic artery							Respiratory > Cardiovascular > Great_Vessels > Brachiocephalic > Junctions
354	junction of the brachiocephalic veins	junction of the brachiocephalic veins			Structure of brachiocephalic vein							Respiratory > Cardiovascular > Great_Vessels > Brachiocephalic > Junctions
355	junction of the right subclavian and jugular veins	junction of the right subclavian and jugular veins			-							Respiratory > Other > Specific_Descriptions
356	junction of the svc and right atrium	junction of the svc and right atrium			Superior vena cava structure && Right atrial structure && Anatomical junction							Respiratory > Other > Specific_Descriptions
357	juncture with the left subclavian vein	left subclavian vein			Structure of left subclavian vein							Respiratory > Cardiovascular > Great_Vessels > Subclavian > Vein > Laterality > Left
358	juxtahilar left mid and lower lung zones	juxtahilar left mid, left lower lung			left juxtahilar region && Left lower lung field (C0929231)							Respiratory > General > Zones > Combined > Specific_Descriptions
359	juxtamediastinal	juxtamediastinal			Paramediastinal lung							Respiratory > Mediastinum > Specific_Descriptions
360	l	l			-							Respiratory > Other > Specific_Descriptions
361	l scapula	left scapula			Left scapula	left scapula				left shoulder, left upper extremity, whole body	left shoulder, left upper extremity, whole body	Respiratory > Musculoskeletal > Bones > Scapula > Laterality > Left
362	l1	l1			Body of vertebra							Respiratory > Musculoskeletal > Bones > Spine > Lumbar > Specific
363	l1 and l2	l1 and l2			Body of vertebra							Respiratory > Musculoskeletal > Bones > Spine > Lumbar > Specific
364	l1 vertebra plana	l1 vertebra plana			Body of vertebra							Respiratory > Musculoskeletal > Bones > Spine > Vertebrae > Specific > L1
365	l1-l5	l1-l5			Body of vertebra							Respiratory > Musculoskeletal > Bones > Spine > Lumbar > Specific
366	l4-5	l4-5			Body of vertebra							Respiratory > Musculoskeletal > Bones > Spine > Vertebrae > Specific > L4-L5
367	lad	lad										Respiratory > Cardiovascular > Great_Vessels > Coronary > Specific
368	lateral	lateral			lateral							Respiratory > Other > Anatomical_Directions > Lateral
369	lateral and anterior	lateral, anterior			-							Respiratory > Other > Anatomical_Directions > Anterior
370	lateral and posterior	lateral, posterior			-							Respiratory > Other > Anatomical_Directions > Posterior
371	lateral and posterior pleural sinus	lateral pleural sinus, posterior pleural sinus			- && Pleural cavity	Pleural		Respiratory System				Respiratory > General > Specific > Pleura > Space
372	lateral and posterior pleural sinuses	lateral pleural sinuse, posterior pleural sinuse			- && Pleural cavity	Pleural		Respiratory System				Respiratory > General > Specific > Pleura > Space
373	lateral and posterior right side	lateral right side, posterior right side			-							Respiratory > Other > Anatomical_Directions > Combined
374	lateral aspect	lateral			lateral							Respiratory > Other > Anatomical_Directions > Lateral
375	lateral aspect of the left hemidiaphragm	left hemidiaphragm	lateral		Structure of left hemidiaphragm	Diaphragm		Abdominal Structures	thorax, whole body	thorax, whole body	thorax, whole body	Respiratory > Diaphragm > Laterality > Left
376	lateral aspect of the right upper lobe	right upper lobe	lateral		Structure of upper lobe of lung	Right lung lobe	Lungs	Respiratory System				Respiratory > General > Lung > Lobes > Upper > Laterality > Right
377	lateral aspect of the upper right lung	upper right lung	lateral		Upper zone of lung (C0559286)	Lungs		Respiratory System				Respiratory > General > Zones > Upper > Laterality > Right
378	lateral aspects of the left hemithorax	left hemithorax	lateral		Hemithoracic structure	Hemithorax		Thoracic Structures				Respiratory > General > Chest > Hemithorax > Laterality > Left
379	lateral chest wall	chest wall	lateral		Chest wall structure	Chest				thorax, whole body	thorax, whole body	Respiratory > General > Chest > Walls > General
380	lateral edge	lateral			lateral							Respiratory > Other > Anatomical_Directions > Lateral
381	lateral inferior costophrenic angles	costophrenic angles	lateral inferior		Costophrenic angle							Respiratory > General > Specific > Costophrenic_Angles > General
382	lateral left lung	left lung	lateral		Lung	Lungs		Respiratory System		thorax, whole body	thorax, whole body	Respiratory > General > Lung > Laterality > Left
383	lateral left mid lung	left mid lung	lateral		Middle zone of lung (C0559287)	Lungs		Respiratory System				Respiratory > General > Zones > Middle > Laterality > Left
384	lateral left upper lung	left upper lung	lateral		Upper zone of lung (C0559286)	Left Lung	Lungs	Respiratory System	thorax, whole body		thorax, whole body	Respiratory > General > Lobes > Upper > Laterality > Left
385	lateral lungs	lungs	lateral		Lung	Lung	Lungs	Respiratory System	thorax, whole body		thorax, whole body	Respiratory > General > Lung > General
386	lateral ninth and left ribs	left ribs	lateral ninth		Bone structure of rib	Left Ribs	Ribs	Musculoskeletal System				Respiratory > Musculoskeletal > Bones > Ribs > Laterality > Left
387	lateral parts	lateral			lateral							Respiratory > Other > Anatomical_Directions > Lateral
388	lateral pleural sinuses	pleural sinuses	lateral		Pleural cavity	Pleural		Respiratory System				Respiratory > General > Specific > Pleura > Space
389	lateral right basilar	right basilar	lateral		Basal segment of lung (C0225704)							Respiratory > General > Specific > Bases > Laterality > Right
390	lateral right costophrenic sulcus	right costophrenic angle	lateral		Right costodiaphragmatic recess							Respiratory > General > Specific > Costophrenic_Angles > Laterality > Right
391	lateral right lower chest	right lower chest	lateral		Chest							Respiratory > General > Chest > Laterality > Right > Position > Lower
392	lateral right lower hemithorax	right hemithorax	lateral lower		Hemithoracic structure	Hemithorax		Thoracic Structures				Respiratory > General > Chest > Hemithorax > Laterality > Right
393	lateral right lung base	right lung base	lateral		Basal segment of lung (C0225704)	Right lungs	Lungs	Respiratory System				Respiratory > General > Lung > Regions > Basal > Laterality > Right
394	lateral right upper hemithorax	right hemithorax	lateral upper		Hemithoracic structure	Hemithorax		Thoracic Structures				Respiratory > General > Chest > Hemithorax > Laterality > Right
395	lateral segment of the right middle lobe	right middle lobe	lateral segment		Structure of middle lobe of lung	Right lung lobe		Respiratory System				Respiratory > General > Lung > Lobes > Middle > Laterality > Right
396	lateral soft tissues	soft tissues	lateral		soft tissue							Respiratory > Musculoskeletal > Soft_Tissues > General
397	lateral to the left hilus	left hilus	lateral		left hilum	Hilar	Lung region	Respiratory System				Respiratory > General > Specific > Hila > Laterality > Left
398	lateral to the right heart border	right heart border	lateral		Cardiac border							Respiratory > Cardiovascular > Heart > Regions > Border > Laterality > Right
399	lateral upright chest	chest	lateral upright		Chest							Respiratory > General > Chest > General
400	left	left			-							Respiratory > Other > Relative_Positions > Left
401	left 11th rib	left rib	11th		Bone structure of rib	Left Ribs	Ribs	Musculoskeletal System				Respiratory > Musculoskeletal > Bones > Ribs > Laterality > Left
402	left 8th rib	left rib	8th		Bone structure of rib	Left Ribs	Ribs	Musculoskeletal System				Respiratory > Musculoskeletal > Bones > Ribs > Laterality > Left
403	left abdomen	left abdomen			Structure of left side of abdomen (C1562302)	Abdomen		Abdominal Structures	whole body		whole body	Respiratory > Abdominal > Regions > Specific_Descriptions
404	left ac joint	left ac joint			Acromioclavicular joint structure							Respiratory > Musculoskeletal > Joints > Acromioclavicular > Laterality > Left
405	left and right	left, right			Bilateral lungs							Respiratory > Other > Relative_Positions > Combined
406	left and right base	left base, right base			Anatomical base (C2987514)							Respiratory > General > Specific > Bases > Laterality > Bilateral
407	left and right brachiocephalic vein	left brachiocephalic vein, right brachiocephalic vein			Structure of brachiocephalic vein							Respiratory > Cardiovascular > Great_Vessels > Brachiocephalic > Vein > Specific_Descriptions
408	left and right lung base	left lung base, right lung base			Basal zone of lung (C0734297)	Lungs		Respiratory System				Respiratory > General > Specific > Bases > Laterality > Bilateral
409	left and right lung bases	left lung base, right lung base			Basal zone of lung (C0734297)	Lungs		Respiratory System				Respiratory > General > Specific > Bases > Laterality > Bilateral
410	left and right lung zones	left lung, right lung			Lung	Lungs		Respiratory System				Respiratory > General > Lung > Laterality > Bilateral
411	left and right perithoracic	left perithoracic, right perithoracic			Bone structure of thorax							Respiratory > Other > Specific_Descriptions
412	left and upper chest	left upper chest			Chest							Respiratory > General > Zones > Upper > Laterality > Left
413	left anterior	left anterior			-							Respiratory > Other > Relative_Positions > Left
414	left anterior axillary	left axillary	anterior		Structure of left axillary region							Respiratory > Other > Relative_Positions > Left
415	left anterior descending artery	left anterior descending artery			Anterior descending branch of left coronary artery	left anterior descending artery				heart, mediastinum, thorax, whole body	heart, mediastinum, thorax, whole body	Respiratory > Cardiovascular > Great_Vessels > Coronary > Specific
416	left apex	left apex			Apical zone of lung	Lungs		Respiratory System				Respiratory > General > Specific > Apices > Laterality > Left
417	left apex medially	left apex	medially		Apical zone of lung	Lungs		Respiratory System				Respiratory > General > Specific > Apices > Laterality > Left
418	left apical	left apical			Apical zone of lung	Lungs		Respiratory System				Respiratory > General > Specific > Apices > Laterality > Left
419	left apical area	left apical			Apical zone of lung	Lungs		Respiratory System				Respiratory > General > Specific > Apices > Laterality > Left
420	left apical lateral	left apical	lateral		Apical zone of lung	Lungs		Respiratory System				Respiratory > General > Specific > Apices > Laterality > Left
421	left apical region	left apical			Apical zone of lung	Lungs		Respiratory System				Respiratory > General > Specific > Apices > Laterality > Left
422	left aspect	left aspect			-							Respiratory > Other > Relative_Positions > Left
423	left aspect of the aortic knob	left aortic knob			left aortic knob							Respiratory > Cardiovascular > Great_Vessels > Aorta > Regions > Knob
424	left atrial	left atrial			Entire left atrium							Respiratory > Cardiovascular > Heart > Chambers > Atrium > Laterality > Left
425	left atrium	left atrium			Entire left atrium	left atrium				heart, mediastinum, thorax, whole body	heart, mediastinum, thorax, whole body	Respiratory > Cardiovascular > Heart > Chambers > Atrium > Laterality > Left
426	left axilla	left axilla			Structure of left axillary region							Respiratory > Other_Anatomical_Structures > Axilla > Laterality > Left
427	left axillary	left axillary			Structure of left axillary region							Respiratory > Other > Relative_Positions > Left
428	left axillary region	left axillary region			Structure of left axillary region							Respiratory > Other_Anatomical_Structures > Axilla > Laterality > Left
429	left axillary/subclavian region	left axillary, left subclavian			Structure of left axillary region && Structure of left subclavian artery							Respiratory > Cardiovascular > Great_Vessels > Subclavian > Laterality > Left
430	left basal	left basal			Basal segment of lung (C0225704)							Respiratory > General > Specific > Bases > Laterality > Left
431	left base	left base			Basal segment of lung (C0225704)							Respiratory > General > Specific > Bases > Laterality > Left
432	left base retrocardiac	left base	retrocardiac									Respiratory > General > Specific > Bases > Laterality > Left
433	left basilar	left basilar			Basal segment of lung (C0225704)							Respiratory > General > Specific > Bases > Laterality > Left
434	left basilar retrocardiac	left basilar	retrocardiac									Respiratory > General > Specific > Bases > Laterality > Left
435	left border	left border			-							Respiratory > Other > Relative_Positions > Left
436	left brachiocephalic	left brachiocephalic			Left brachiocephalic vein							Respiratory > Cardiovascular > Great_Vessels > Brachiocephalic > Vein > Laterality > Left
437	left brachiocephalic artery	left brachiocephalic artery			Brachiocephalic artery Left							Respiratory > Cardiovascular > Great_Vessels > Brachiocephalic > Artery > Laterality > Left
438	left brachiocephalic trunk	left brachiocephalic trunk			Trunk of left brachiocephalic vein (C0933699)							Respiratory > Cardiovascular > Great_Vessels > Brachiocephalic > Artery > Laterality > Left
439	left brachiocephalic vein	left brachiocephalic vein			Left brachiocephalic vein	left brachiocephalic vein				thorax, whole body	thorax, whole body	Respiratory > Cardiovascular > Great_Vessels > Brachiocephalic > Vein > Laterality > Left
440	left brachiocephalic/superior vena cava	left brachiocephalic, superior vena cava			Left brachiocephalic vein (C0501122) && Superior vena cava structure (C0042459)							Respiratory > Cardiovascular > Great_Vessels > Subclavian > Specific_Descriptions
441	left bronchus	left bronchus			Bronchi							Respiratory > General > Specific > Bronchi > Laterality > Left > Main
442	left cardiac apex	left cardiac apex			Structure of apex of heart							Respiratory > Cardiovascular > Heart > Regions > Apex > Laterality > Left
443	left cardiac border	left cardiac border			Cardiac border							Respiratory > Cardiovascular > Heart > Regions > Border > Laterality > Left
444	left carotid	left carotid			Carotid vessel							Respiratory > Cardiovascular > Great_Vessels > Carotid > Laterality > Left
445	left cephalic	left cephalic			-							Respiratory > Other > Relative_Positions > Left
446	left chest	left chest			Chest							Respiratory > General > Chest > Laterality > Left > General
447	left chest apex	left chest apex			Chest							Respiratory > General > Chest > Laterality > Left > Position > Apex
448	left chest wall	left chest wall			Chest wall structure	Chest						Respiratory > General > Chest > Walls > Laterality > Left
449	left chest wall laterally	left chest wall laterally			Left lateral chest wall (C0818150)	Chest						Respiratory > General > Chest > Walls > Laterality > Left
450	left clavicle	left clavicle			Bone structure of clavicle	Clavicles		Musculoskeletal System		left shoulder, left upper extremity, whole body	left shoulder, left upper extremity, whole body	Respiratory > Musculoskeletal > Bones > Clavicle > Laterality > Left
451	left clavicular	left clavicular			Bone structure of clavicle	Clavicles		Musculoskeletal System				Respiratory > Musculoskeletal > Bones > Clavicle > Laterality > Left
452	left clavicular shaft	left clavicular shaft			Structure of shaft of clavicle	Clavicles		Musculoskeletal System				Respiratory > Musculoskeletal > Bones > Clavicle > Laterality > Left
453	left costophrenic angle	left costophrenic angle			Costophrenic angle							Respiratory > General > Specific > Costophrenic_Angles > Laterality > Left
454	left costophrenic sinus	left costophrenic sinus			Costophrenic angle							Respiratory > General > Specific > Costophrenic_Angles > Laterality > Left
455	left costophrenic sulcus	left costophrenic sulcus			Costophrenic angle							Respiratory > General > Specific > Costophrenic_Angles > Laterality > Left
456	left flank	left flank			Structure of left flank							Respiratory > Abdominal > Regions > Flank > Laterality > Left
457	left fourth rib	left rib	fourth		Bone structure of rib	Left Ribs	Ribs	Musculoskeletal System				Respiratory > Musculoskeletal > Bones > Ribs > Laterality > Left
458	left glenohumeral joint	left glenohumeral joint			Left glenohumeral joint	left glenohumeral joint				left shoulder, left upper extremity, whole body	left shoulder, left upper extremity, whole body	Respiratory > Musculoskeletal > Joints > Glenohumeral > Laterality > Left
459	left glenohumeral joints	left glenohumeral joints			Left glenohumeral joint							Respiratory > Musculoskeletal > Joints > Glenohumeral > Laterality > Left
460	left heart	left heart			Left side of heart							Respiratory > Cardiovascular > Heart > Laterality > Left
461	left heart border	left heart border			Cardiac border							Respiratory > Cardiovascular > Heart > Regions > Border > Laterality > Left
462	left heart border and aortic lumen junction	left heart border and aortic lumen junction			Cardiac border && Structure of lumen of aorta							Respiratory > Cardiovascular > Heart > Regions > Border > Laterality > Left
463	left hemidiaphragm	left hemidiaphragm			Structure of left hemidiaphragm	Diaphragm		Abdominal Structures	thorax, whole body	thorax, whole body	thorax, whole body	Respiratory > Diaphragm > Laterality > Left
464	left hemithorax	left hemithorax			Hemithoracic structure	Hemithorax		Thoracic Structures				Respiratory > General > Chest > Hemithorax > Laterality > Left
465	left hilar	left hilar			Hilar	Lung region		Respiratory System				Respiratory > General > Specific > Hila > Laterality > Left
466	left hilar area	left hilar area			Hilar	Lung region		Respiratory System				Respiratory > General > Specific > Hila > Laterality > Left
467	left hilar region	left hilar region			Hilar	Lung region		Respiratory System				Respiratory > General > Specific > Hila > Laterality > Left
468	left hilar/perihilar	left hilar, left perihilar			Hilar && Structure of perihilar region of lung	Lung region		Respiratory System				Respiratory > General > Specific > Hila > Laterality > Left
469	left hilum	left hilum			left hilum	Lung region		Respiratory System				Respiratory > General > Specific > Hila > Laterality > Left
470	left hilus	left hilus			left hilum	Hilar	Lung region	Respiratory System				Respiratory > General > Specific > Hila > Laterality > Left
471	left humeral	left humeral			Left humerus							Respiratory > Musculoskeletal > Bones > Humerus > Laterality > Left
472	left ij	left ij			Left internal jugular vein							Respiratory > Other_Anatomical_Structures > Specific_Descriptions
473	left infrahilar	left infrahilar			left infrahilum							Respiratory > General > Specific > Infrahilar > Laterality > Left
474	left infrahilar regions	left infrahilar regions			left infrahilum							Respiratory > General > Specific > Infrahilar > Laterality > Left
475	left innominate vein	left innominate vein			Left brachiocephalic vein							Respiratory > Cardiovascular > Great_Vessels > Brachiocephalic > Vein > Laterality > Left
476	left internal jugular	left internal jugular			Left internal jugular vein							Respiratory > Cardiovascular > Great_Vessels > Jugular > Internal > Laterality > Left
477	left internal jugular vein	left internal jugular vein			Left internal jugular vein							Respiratory > Cardiovascular > Great_Vessels > Jugular > Internal > Laterality > Left
478	left jugular	left jugular			Left internal jugular vein							Respiratory > Cardiovascular > Great_Vessels > Jugular > Laterality > Left
479	left jugular vein	left jugular vein			Left internal jugular vein							Respiratory > Cardiovascular > Great_Vessels > Jugular > Laterality > Left
480	left juxta-hilar	left juxta-hilar			left juxtahilar region	Lung region		Respiratory System				Respiratory > General > Specific > Juxtahilar > Laterality > Left
481	left juxtahilar	left juxtahilar			left juxtahilar region							Respiratory > General > Specific > Juxtahilar > Laterality > Left
482	left juxtahilar region	left juxtahilar region			left juxtahilar region							Respiratory > General > Specific > Juxtahilar > Laterality > Left
483	left lateral	left lateral			-							Respiratory > Other > Relative_Positions > Left
484	left lateral and posterior	left lateral, left posterior										Respiratory > Other > Relative_Positions > Left
485	left lateral basal lung areas	left basal lung areas	lateral		Basal segment of lung (C0225704)	Lungs		Respiratory System				Respiratory > General > Lung > Regions > Basal > Laterality > Left
486	left lateral chest wall	left lateral chest wall			Left lateral chest wall (C0818150)	Chest						Respiratory > Other > Relative_Positions > Left
487	left lateral costophrenic angle	left costophrenic angle	lateral		Costophrenic angle							Respiratory > General > Specific > Costophrenic_Angles > Laterality > Left
488	left lateral lung base	left lung base	lateral		Basal segment of lung (C0225704)	Left Lung	Lungs	Respiratory System	thorax, whole body		thorax, whole body	Respiratory > General > Lung > Regions > Basal > Laterality > Left
489	left lateral lung zone	left lung zone	lateral		Lung			Respiratory System				Respiratory > General > Lung > Laterality > Left
490	left lateral suprahilar lungs	left suprahilar lungs	lateral		suprahilar			Respiratory System				Respiratory > General > Specific > Suprahilar > Laterality > Left
491	left lingular	left lingular			Lingula							Respiratory > General > Lobes > Middle > Laterality > Left
492	left lingular area	left lingular area			Lingula							Respiratory > General > Lobes > Middle > Laterality > Left
493	left lobe	left lobe			Structure of lobe of lung			Respiratory System				Respiratory > General > Lobes > Upper > Laterality > Left
494	left lower	left lower			left lower lung zone							Respiratory > General > Lobes > Lower > Laterality > Left
495	left lower chest	left lower chest			Chest							Respiratory > General > Chest > Laterality > Left > Position > Lower
496	left lower hemithorax	left hemithorax	lower		Hemithoracic structure			Thoracic Structures				Respiratory > General > Chest > Hemithorax > Laterality > Left
497	left lower lobe	left lower lobe			Structure of lower lobe of lung (C1261077)	Lungs		Respiratory System				Respiratory > General > Lung > Lobes > Lower > Laterality > Left
498	left lower lobe bronchus	left lower lobe	bronchus		Structure of lower lobe of lung (C1261077)	Lungs		Respiratory System				Respiratory > General > Lung > Lobes > Lower > Laterality > Left
499	left lower lobe laterally	left lower lobe	lateral		Structure of lower lobe of lung (C1261077)	Lungs		Respiratory System				Respiratory > General > Lung > Lobes > Lower > Laterality > Left
500	left lower lobe posterior	left lower lobe	posterior		Structure of lower lobe of lung (C1261077)	Lungs		Respiratory System				Respiratory > General > Lung > Lobes > Lower > Laterality > Left
501	left lower lobe region	left lower lobe			Structure of lower lobe of lung (C1261077)	Lungs		Respiratory System				Respiratory > General > Lung > Lobes > Lower > Laterality > Left
502	left lower lobe retrocardiac	left lower lobe	retrocardiac		Structure of lower lobe of lung (C1261077)	Lungs		Respiratory System				Respiratory > General > Lung > Lobes > Lower > Laterality > Left
503	left lower lobe retrocardiac region	left lower lobe	retrocardiac		Structure of lower lobe of lung (C1261077)	Lungs		Respiratory System				Respiratory > General > Lung > Lobes > Lower > Laterality > Left
504	left lower lobe subpleural	left lower lobe	subpleural		Structure of lower lobe of lung (C1261077)	Lungs		Respiratory System				Respiratory > General > Lung > Lobes > Lower > Laterality > Left
505	left lower lobe superior segment	left lower lobe	superior segment		Structure of lower lobe of lung (C1261077)	Lungs		Respiratory System				Respiratory > General > Lung > Lobes > Lower > Laterality > Left
506	left lower lobes	left lower lobes			Structure of lower lobe of lung	Left lung	Lungs	Respiratory System	thorax, whole body		thorax, whole body	Respiratory > General > Lobes > Lower > Laterality > Left
507	left lower lung	left lower lung			Lower zone of lung (C0559288)			Respiratory System				Respiratory > General > Zones > Lower > Laterality > Left
508	left lower lung base	left lower lung	base		Lower zone of lung (C0559288)			Respiratory System				Respiratory > General > Zones > Lower > Laterality > Left
509	left lower lung field	left lower lung field			Lower zone of lung (C0559288)			Respiratory System				Respiratory > General > Zones > Lower > Laterality > Left
510	left lower mediastinal contour	left lower mediastinal contour			Mediastinum							Respiratory > Mediastinum > Regions > Lower > Laterality > Left
511	left lower peripheral	left lower	peripheral		left lower lung zone							Respiratory > General > Lobes > Lower > Laterality > Left
512	left lower rib	left rib	lower		Bone structure of rib	Left Ribs	Ribs	Musculoskeletal System				Respiratory > Musculoskeletal > Bones > Ribs > Laterality > Left
513	left lower zone	left lower			left lower lung zone							Respiratory > General > Lobes > Lower > Laterality > Left
514	left lung	left lung			Lung	left lung		Respiratory System		thorax, whole body	thorax, whole body	Respiratory > General > Lung > Laterality > Left
515	left lung apex	left lung apex			Apical zone of lung			Respiratory System				Respiratory > General > Specific > Apices > Laterality > Left
516	left lung base	left lung base			Basal segment of lung (C0225704)	Left Lung	Lungs	Respiratory System	thorax, whole body		thorax, whole body	Respiratory > General > Lung > Regions > Basal > Laterality > Left
517	left lung bases	left lung bases			Basal segment of lung (C0225704)			Respiratory System				Respiratory > General > Lung > Regions > Basal > Laterality > Left
518	left lung peripherally	left lung	peripherally		Lung	left lung		Respiratory System		thorax, whole body	thorax, whole body	Respiratory > General > Lung > Laterality > Left
519	left lung periphery	left lung	periphery		Lung	left lung		Respiratory System		thorax, whole body	thorax, whole body	Respiratory > General > Lung > Laterality > Left
520	left major fissure	left major fissure			Major fissure (C0929208)	Lung		Respiratory System	thorax, whole body		thorax, whole body	Respiratory > General > Specific > Fissures > Major > Laterality > Left
521	left mediastinal	left mediastinal			Mediastinum							Respiratory > Mediastinum > Laterality > Left
522	left mediastinal contour	left mediastinal contour			Mediastinum							Respiratory > Mediastinum > Laterality > Left
523	left mediastinum	left mediastinum			Mediastinum							Respiratory > Mediastinum > Laterality > Left
524	left mid and lower lobe	left mid lobe, left lower lobe			Structure of middle lobe of lung && Structure of lower lobe of lung			Respiratory System				Respiratory > General > Lobes > Combined > Laterality > Left
525	left mid and lower lung	left mid lung, left lower lung			Middle zone of lung (C0559287) && Lower zone of lung (C0559288)			Respiratory System				Respiratory > General > Zones > Combined > Laterality > Left
526	left mid and lower lung fields	left mid lung, left lower lung			Middle zone of lung (C0559287) && Lower zone of lung (C0559288)			Respiratory System				Respiratory > General > Zones > Combined > Laterality > Left
527	left mid and lower lung region	left mid lung, left lower lung			Middle zone of lung (C0559287) && Lower zone of lung (C0559288)			Respiratory System				Respiratory > General > Zones > Combined > Laterality > Left
528	left mid and lower lung zones	left mid lung, left lower lung			Middle zone of lung (C0559287) && Lower zone of lung (C0559288)			Respiratory System				Respiratory > General > Zones > Combined > Laterality > Left
529	left mid and lower lungs	left mid lung, left lower lung			Middle zone of lung (C0559287) && Lower zone of lung (C0559288)			Respiratory System				Respiratory > General > Zones > Combined > Laterality > Left
530	left mid and upper zones	left mid, left upper			left mid lung zone && left upper lung zone							Respiratory > General > Zones > Combined > Laterality > Left
531	left mid chest	left mid chest			Chest							Respiratory > General > Chest > Laterality > Left > Position > Middle
532	left mid clavicular	left mid clavicular			Bone structure of clavicle			Musculoskeletal System				Respiratory > Musculoskeletal > Bones > Clavicle > Specific_Descriptions
533	left mid lobe	left mid lobe			-			Respiratory System				Respiratory > General > Lobes > Middle > Laterality > Left
534	left mid lower lobe	left lower lobe	mid		Structure of lower lobe of lung (C1261077)	Lungs		Respiratory System				Respiratory > General > Lung > Lobes > Lower > Laterality > Left
535	left mid lung	left mid lung			Middle zone of lung (C0559287)			Respiratory System				Respiratory > General > Zones > Middle > Laterality > Left
536	left mid lung field	left mid lung field			Middle zone of lung (C0559287)			Respiratory System				Respiratory > General > Zones > Middle > Laterality > Left
537	left mid lung laterally	left mid lung	laterally		Middle zone of lung (C0559287)			Respiratory System				Respiratory > General > Zones > Middle > Laterality > Left
538	left mid lung zone	left mid lung zone			Middle zone of lung (C0559287)			Respiratory System				Respiratory > General > Zones > Middle > Laterality > Left
539	left mid posterior	left mid	posterior		-							Respiratory > General > Lung > Regions > Mid > Laterality > Left
540	left mid shaft	left mid shaft			-							Respiratory > Musculoskeletal > Bones > Clavicle > Specific_Descriptions
541	left mid thoracic spine	left mid thoracic spine			Thoracic spine structure			Skeletal System				Respiratory > Musculoskeletal > Bones > Spine > Thoracic > Specific_Descriptions
542	left mid to lower lung	left lung	mid to lower		Lung	left lung		Respiratory System		thorax, whole body	thorax, whole body	Respiratory > General > Lung > Laterality > Left
543	left mid to upper lung	left lung	mid to upper		Lung	left lung		Respiratory System		thorax, whole body	thorax, whole body	Respiratory > General > Lung > Laterality > Left
544	left mid upper lung	left lung	mid upper		Lung	left lung		Respiratory System		thorax, whole body	thorax, whole body	Respiratory > General > Lung > Laterality > Left
545	left mid zone	left mid zone			left mid lung zone							Respiratory > General > Zones > Middle > Laterality > Left
546	left mid-lower lung	left lung	mid-lower		Lung	left lung		Respiratory System		thorax, whole body	thorax, whole body	Respiratory > General > Lung > Laterality > Left
547	left mid-to-lower lung	left lung	mid-to-lower		Lung	left lung		Respiratory System		thorax, whole body	thorax, whole body	Respiratory > General > Lung > Laterality > Left
548	left mid-to-lower lung fields	left lung	mid-to-lower		Lung	left lung		Respiratory System		thorax, whole body	thorax, whole body	Respiratory > General > Lung > Laterality > Left
549	left mid/shaft	left mid/shaft			-							Respiratory > Musculoskeletal > Bones > Clavicle > Specific_Descriptions
550	left middle and lower lung	left middle lung, left lower lung			Middle zone of lung (C0559287) && Lower zone of lung (C0559288)			Respiratory System				Respiratory > General > Lobes > Combined > Laterality > Left
551	left middle lung	left middle lung			Middle zone of lung (C0559287)			Respiratory System				Respiratory > General > Zones > Middle > Laterality > Left
552	left middle ribs posteriorly	left ribs	middle posteriorly		Bone structure of rib	Ribs		Musculoskeletal System				Respiratory > Musculoskeletal > Bones > Ribs > Laterality > Left
553	left midlung	left midlung			left mid lung zone							Respiratory > General > Regions > Other > Laterality > Left
554	left mild lung	left lung	mild		Lung	left lung		Respiratory System		thorax, whole body	thorax, whole body	Respiratory > General > Lung > Laterality > Left
555	left of midline	left midline			-							Respiratory > Other > Relative_Positions > Left
556	left of the trachea along the aortic arch	left of the trachea	along the aortic arch		Trachea			Respiratory System				Respiratory > Other > Relative_Positions > Left
557	left paraspinal region in the abdomen	left paraspinal region in the abdomen			Structure of subregion of abdomen (C1720043)			Abdominal Structures				Respiratory > Other > Specific_Descriptions
558	left parietal	left parietal			-							Respiratory > Other > Relative_Positions > Left
559	left pectoral	left pectoral			Pectoral region structure							Respiratory > Other > Relative_Positions > Left
560	left pectoral generator	left pectoral generator			-							Respiratory > Other > Relative_Positions > Left
561	left perihilar	left perihilar			Structure of perihilar region of lung							Respiratory > General > Specific > Perihilar > Laterality > Left
562	left perihilar and basilar	left perihilar, basilar			Structure of perihilar region of lung && Basal segment of lung (C0225704)							Respiratory > General > Specific > Perihilar > Laterality > Left
563	left perihilar areas	left perihilar areas			Structure of perihilar region of lung							Respiratory > General > Specific > Perihilar > Laterality > Left
564	left perihilar mid-to-lower lung	left perihilar lung	mid-to-lower		Structure of perihilar region of left lung (C0225738)			Respiratory System				Respiratory > General > Specific > Perihilar > Laterality > Left
565	left perihilar region	left perihilar region			Structure of perihilar region of lung							Respiratory > General > Specific > Perihilar > Laterality > Left
566	left pleural	left pleural			Pleura			Respiratory System				Respiratory > General > Specific > Pleura > Laterality > Left
567	left pneumectomy cavity	left pneumectomy cavity			Pneumonectomy							Respiratory > General > Regions > Other > Laterality > Left
568	left posterior	left posterior			-							Respiratory > Other > Relative_Positions > Left
569	left posterior 6th rib	left rib	posterior 6th		Bone structure of rib	Left Ribs	Ribs	Musculoskeletal System				Respiratory > Musculoskeletal > Bones > Ribs > Laterality > Left
570	left posterior 7th rib	left rib	posterior 7th		Bone structure of rib	Left Ribs	Ribs	Musculoskeletal System				Respiratory > Musculoskeletal > Bones > Ribs > Laterality > Left
571	left posterior costophrenic	left posterior costophrenic			Costophrenic angle							Respiratory > General > Specific > Costophrenic_Angles > Laterality > Left
572	left posterior costophrenic angle	left posterior costophrenic angle			Costophrenic angle							Respiratory > General > Specific > Costophrenic_Angles > Laterality > Left
573	left posterior rib	left rib	posterior		Bone structure of rib	Left Ribs	Ribs	Musculoskeletal System				Respiratory > Musculoskeletal > Bones > Ribs > Laterality > Left
574	left posterior third rib	left rib	posterior third		Bone structure of rib	Left Ribs	Ribs	Musculoskeletal System				Respiratory > Musculoskeletal > Bones > Ribs > Laterality > Left
575	left posteriorly	left posteriorly			-							Respiratory > Other > Relative_Positions > Left
576	left posterolateral third rib	left rib	posterolateral third		Bone structure of rib	Left Ribs	Ribs	Musculoskeletal System				Respiratory > Musculoskeletal > Bones > Ribs > Laterality > Left
577	left predominant	left	predominant		-							Respiratory > Other > Relative_Positions > Left
578	left retrocardiac	left retrocardiac			-							Respiratory > General > Regions > Retrocardiac > Laterality > Left
579	left retrocardiac region	left retrocardiac region			-							Respiratory > General > Regions > Retrocardiac > Laterality > Left
580	left rib	left rib			Bone structure of rib	Left Ribs	Ribs	Musculoskeletal System				Respiratory > Musculoskeletal > Bones > Ribs > Laterality > Left
581	left ribcage	left ribcage			Rib Cage			Musculoskeletal System				Respiratory > Musculoskeletal > Bones > Ribs > Laterality > Left
582	left shoulder girdle	left shoulder girdle			Bone structure of left shoulder girdle			Adjacent Structures				Respiratory > Musculoskeletal > Joints > Shoulder > Laterality > Left
583	left side	left side			-							Respiratory > Other > Relative_Positions > Left
584	left side of chest	left side of chest			Chest							Respiratory > General > Chest > Laterality > Left > General
585	left sided	left sided			-							Respiratory > Other > Relative_Positions > Left
586	left sixth rib	left rib	sixth		Bone structure of rib	Left Ribs	Ribs	Musculoskeletal System				Respiratory > Musculoskeletal > Bones > Ribs > Laterality > Left
587	left soft tissues	left soft tissues			soft tissue							Respiratory > Musculoskeletal > Soft_Tissues > Laterality > Left
588	left subclavian	left subclavian			left subclavian							Respiratory > Cardiovascular > Great_Vessels > Subclavian > Laterality > Left
589	left subclavian and brachiocephalic vessels	left subclavian vessel, left brachiocephalic vessel			left subclavian && Left brachiocephalic vein (C0501122)							Respiratory > Cardiovascular > Great_Vessels > Subclavian > Laterality > Left
590	left subclavian artery	left subclavian artery			Structure of left subclavian artery	left subclavian artery				thorax, whole body	thorax, whole body	Respiratory > Cardiovascular > Great_Vessels > Subclavian > Artery > Laterality > Left
591	left subclavian vein	left subclavian vein			Structure of left subclavian vein							Respiratory > Cardiovascular > Great_Vessels > Subclavian > Vein > Laterality > Left
592	left subclavian vein stent	left subclavian vein stent										Respiratory > Cardiovascular > Great_Vessels > Subclavian > Vein > Laterality > Left
593	left superior	left superior			-							Respiratory > Other > Relative_Positions > Left
594	left superior mediastinal	mediastinal	left superior		Mediastinum							Respiratory > Mediastinum > General
595	left superior vena cava	left superior vena cava			Left superior vena cava							Respiratory > Cardiovascular > Great_Vessels > Vena_Cava > Superior > Laterality > Left
596	left superior vena cava to the right ventricular apex	left superior vena cava	to the right ventricular apex		Left superior vena cava							Respiratory > Cardiovascular > Great_Vessels > Vena_Cava > Superior > Laterality > Left
597	left supra hilar lung	left supra hilar lung			suprahilar			Respiratory System				Respiratory > General > Specific > Suprahilar > Laterality > Left
598	left suprahilar	left suprahilar			-							Respiratory > General > Specific > Suprahilar > Laterality > Left
599	left suprahilar area	left suprahilar area			-							Respiratory > General > Specific > Suprahilar > Laterality > Left
600	left suprahilar region	left suprahilar region			-							Respiratory > General > Specific > Suprahilar > Laterality > Left
601	left svc	left svc			Left superior vena cava							Respiratory > Cardiovascular > Great_Vessels > Vena_Cava > Superior > Laterality > Left
602	left third and fourth rib space	left rib space	third	fourth	Cavity of rib (C2334954)			Musculoskeletal System				Respiratory > Musculoskeletal > Bones > Ribs > Laterality > Left
603	left thorax	left thorax			Bone structure of thorax							Respiratory > General > Chest > Laterality > Left > General
604	left trachea	left trachea			Trachea			Respiratory System				Respiratory > General > Specific > Trachea > Laterality > Left
605	left trachea at the level of the clavicles	left trachea	level of the clavicles		Trachea			Respiratory System				Respiratory > General > Specific > Trachea > Laterality > Left
606	left upper	left upper			Structure of upper lobe of lung							Respiratory > General > Zones > Upper > Laterality > Left
607	left upper abdomen	left upper abdomen			Structure of left upper quadrant of abdomen (C0230179)			Abdominal Structures				Respiratory > Abdominal > Regions > Upper > Laterality > Left
608	left upper abdominal quadrant	left upper abdominal quadrant			Structure of left upper quadrant of abdomen (C0230179)			Abdominal Structures				Respiratory > Abdominal > Regions > Quadrants > Upper_Left
609	left upper and bilateral lower lung fields	left upper lung, bilateral lower lung			Upper zone of lung (C0559286) && Lower zone of lung (C0559288)	Left Lung	Lungs	Respiratory System	thorax, whole body		thorax, whole body	Respiratory > General > Lobes > Upper > Specific_Descriptions
610	left upper and lower zones	left upper zone, left lower zone			left upper lung zone && left lower lung zone			Respiratory System				Respiratory > General > Zones > Combined > Laterality > Left
611	left upper and mid	left upper, left mid			left upper lung zone && -							Respiratory > General > Zones > Combined > Laterality > Left
612	left upper and mid lung	left upper lung, left mid lung			Middle zone of lung (C0559287) && Upper zone of lung (C0559286)	Left Lung	Lungs	Respiratory System	thorax, whole body		thorax, whole body	Respiratory > General > Zones > Combined > Laterality > Left
613	left upper chest wall	left upper chest wall			Chest wall structure	Chest						Respiratory > Other > Specific_Descriptions
614	left upper extremity	left upper extremity			Upper Extremity	left upper extremity				whole body	whole body	Respiratory > Other_Anatomical_Structures > Extremities > Upper > Laterality > Left
615	left upper hemithorax	left hemithorax	upper		Hemithoracic structure			Thoracic Structures				Respiratory > General > Chest > Hemithorax > Laterality > Left
616	left upper lobe	left upper lobe			Structure of upper lobe of lung			Respiratory System				Respiratory > General > Lung > Lobes > Upper > Laterality > Left
617	left upper lobe apical segment	left upper lobe	apical segment		Structure of upper lobe of lung			Respiratory System				Respiratory > General > Lung > Lobes > Upper > Laterality > Left
618	left upper lobe lateral to the left hilum	left upper lobe	lateral to the left hilum		Structure of upper lobe of lung			Respiratory System				Respiratory > General > Lung > Lobes > Upper > Laterality > Left
619	left upper lobe lingula	left upper lobe	lingula		Structure of upper lobe of lung			Respiratory System				Respiratory > General > Lung > Lobes > Upper > Laterality > Left
620	left upper lobe paramediastinal	left upper lobe	paramediastinal		Structure of upper lobe of lung			Respiratory System				Respiratory > General > Lung > Lobes > Upper > Laterality > Left
621	left upper lung	left upper lung			Upper zone of lung (C0559286)	Left Lung	Lungs	Respiratory System	thorax, whole body		thorax, whole body	Respiratory > General > Lobes > Upper > Laterality > Left
622	left upper lung field	left upper lung field			Upper zone of lung (C0559286)	Left Lung	Lungs	Respiratory System	thorax, whole body		thorax, whole body	Respiratory > General > Lobes > Upper > Laterality > Left
623	left upper lung perihilar	left upper lung	perihilar		Upper zone of lung (C0559286)	Left Lung	Lungs	Respiratory System	thorax, whole body		thorax, whole body	Respiratory > General > Lobes > Upper > Laterality > Left
624	left upper lung zone	left upper lung zone			Upper zone of lung (C0559286)	Left Lung	Lungs	Respiratory System	thorax, whole body		thorax, whole body	Respiratory > General > Lobes > Upper > Laterality > Left
625	left upper mediastinum	left upper mediastinum			Mediastinum							Respiratory > Mediastinum > Laterality > Left
626	left upper pleural	left upper pleural			Pleura (C0032225)			Respiratory System				Respiratory > General > Regions > Other > Laterality > Left
627	left upper quadrant	left upper quadrant			Structure of left upper quadrant of abdomen							Respiratory > Abdominal > Regions > Quadrants > Upper_Left
628	left upper quadrant of abdomen	left upper quadrant of abdomen			Structure of left upper quadrant of abdomen (C0230179)			Abdominal Structures				Respiratory > Abdominal > Regions > Quadrants > Upper_Left
629	left upper quadrant of the abdomen	left upper quadrant of the abdomen			Structure of left upper quadrant of abdomen (C0230179)			Abdominal Structures				Respiratory > Abdominal > Regions > Quadrants > Upper_Left
630	left upper to mid lung	left lung	upper to mid		Lung	left lung		Respiratory System		thorax, whole body	thorax, whole body	Respiratory > General > Lung > Laterality > Left
631	left upper zone	left upper zone			Structure of upper lobe of lung							Respiratory > General > Zones > Upper > Laterality > Left
632	left upper-to-mid lung	left lung	upper-to-mid		Lung	left lung		Respiratory System		thorax, whole body	thorax, whole body	Respiratory > General > Lung > Laterality > Left
633	left upper-to-mid lung zone	left lung zone	upper-to-mid		Lung			Respiratory System				Respiratory > General > Lung > Laterality > Left
634	left ventricle	left ventricle			Left ventricular structure	left ventricle				heart, mediastinum, thorax, whole body	heart, mediastinum, thorax, whole body	Respiratory > Cardiovascular > Heart > Chambers > Ventricle > Laterality > Left
635	left ventricular	left ventricular			Left ventricular structure							Respiratory > Cardiovascular > Heart > Chambers > Ventricle > Laterality > Left
636	left-side	left-side			-							Respiratory > Other > Relative_Positions > Left
637	left-sided	left-sided			-							Respiratory > Other > Relative_Positions > Left
638	left-sided basal	left-sided basal			Basal segment of lung (C0225704)							Respiratory > Other > Relative_Positions > Left
639	left-sided chest wall	left-sided chest wall			Chest wall structure	Chest						Respiratory > General > Chest > Walls > Laterality > Left
640	left-sided diaphragm	left-sided diaphragm			Left Portion of the Diaphragm			Abdominal Structures				Respiratory > Diaphragm > Laterality > Left
641	left-sided hemithorax	left-sided hemithorax			Hemithoracic structure			Thoracic Structures				Respiratory > General > Chest > Hemithorax > Laterality > Left
642	left-sided lateral pleural sinus	left-sided pleural sinus	lateral		Pleural cavity (C0178802)			Respiratory System				Respiratory > General > Specific > Pleura > Laterality > Left
643	left-sided svc	left-sided svc			Left superior vena cava							Respiratory > Cardiovascular > Great_Vessels > Vena_Cava > Superior > Laterality > Left
644	left-sided svc placement	left-sided svc			Left superior vena cava							Respiratory > Cardiovascular > Great_Vessels > Vena_Cava > Superior > Laterality > Left
645	leftward	leftward			-							Respiratory > Other > Relative_Positions > Left
646	leftward of midline	leftward midline			-							Respiratory > Other > Relative_Positions > Left
647	leftward shift	leftward shift										Respiratory > Other > Specific_Descriptions
648	level of cavoatrial junction	cavoatrial junction			cavoatrial junction							Respiratory > Cardiovascular > Great_Vessels > Vena_Cava > Superior > Junctions
649	level of superior svc	svc	superior		Superior vena cava structure							Respiratory > Cardiovascular > Great_Vessels > Vena_Cava > Superior > General
650	level of the aortic arch	aortic arch			Aortic arch structure	aortic arch				mediastinum, thorax, whole body	mediastinum, thorax, whole body	Respiratory > Cardiovascular > Great_Vessels > Aorta > Regions > Arch
651	level of the carina	carina			Structure of carina	carina		Respiratory System		mediastinum, thorax, whole body	mediastinum, thorax, whole body	Respiratory > General > Specific > Carina > General
652	level of the cavoatrial junction	cavoatrial junction			cavoatrial junction							Respiratory > Cardiovascular > Great_Vessels > Vena_Cava > Superior > Junctions
653	level of the clavicular	clavicular			Bone structure of clavicle			Musculoskeletal System				Respiratory > Musculoskeletal > Bones > Clavicle > General
654	level of the sixth anterior rib	rib	sixth anterior		Bone structure of rib	Ribs	Ribs	Musculoskeletal System				Respiratory > Musculoskeletal > Bones > Ribs > General
655	ligament of treitz	ligament of treitz			-	ligament of treitz				peritoneal cavity, abdomen, whole body	peritoneal cavity, abdomen, whole body	Respiratory > Abdominal > Other > Ligament_of_Treitz
656	likely l1	likely l1			Body of vertebra							Respiratory > Musculoskeletal > Bones > Spine > Specific > Lumbar
657	lingula	lingula			Lingula	lingula				left lung, thorax, whole body	left lung, thorax, whole body	Respiratory > General > Zones > Lingula
658	lingular	lingular			Lingula							Respiratory > General > Lobes > Specific_Descriptions
659	low abdominal	low abdominal			Structure of lower abdominal quadrant (C0230184)			Abdominal Structures				Respiratory > Abdominal > Regions > Lower
660	low lung	low lung			Lower zone of lung (C0559288)			Respiratory System				Respiratory > General > Lung > Zones > Lower > General
661	low right axilla	right axilla	low		Structure of right axillary region							Respiratory > Other_Anatomical_Structures > Axilla > Laterality > Right
662	low svc	svc	low		Superior vena cava structure							Respiratory > Cardiovascular > Great_Vessels > Vena_Cava > Superior > General
663	low thoracic spine	thoracic spine	low		Thoracic spine structure			Skeletal System				Respiratory > Musculoskeletal > Bones > Spine > Thoracic > General
664	low thoracic/upper lumbar vertebral bodies	thoracic vertebral bodies, lumbar vertebral bodies	low	upper	Bone structure of thoracic vertebra (C0039987) && Structure of body of lumbar vertebra							Respiratory > Musculoskeletal > Bones > Spine > General
665	lower	lower			Lower body structure							Respiratory > Other > Specific_Descriptions
666	lower abdomen	lower abdomen			Structure of lower abdominal quadrant (C0230184)			Abdominal Structures				Respiratory > Abdominal > Regions > Lower
667	lower and middle lobes	lower lobe, middle lobe			Structure of middle lobe of lung && Structure of lower lobe of lung			Respiratory System				Respiratory > General > Lobes > Lower > General
668	lower and middle lobes bilaterally	lower lobe bilaterally, middle lobe bilaterally			Structure of middle lobe of lung && Structure of lower lobe of lung			Respiratory System				Respiratory > General > Lobes > Lower > Laterality > Bilateral
669	lower area	lower			Lower body structure							Respiratory > Other > Specific_Descriptions
670	lower bodies of the stomach	bodies of the stomach	lower		Body of stomach (C0227230)	Stomach	Stomach	Abdominal Structures	peritoneal cavity, abdomen, whole body		peritoneal cavity, abdomen, whole body	Respiratory > Abdominal > Organs > Stomach > General
671	lower c-spine	c-spine	lower		Cervical spine			Skeletal System				Respiratory > Musculoskeletal > Bones > Spine > Cervical
672	lower cervical spine	cervical spine	lower		Cervical spine			Skeletal System				Respiratory > Musculoskeletal > Bones > Spine > Cervical
673	lower esophagus	esophagus	lower		Esophagus	esophagus				mediastinum, thorax, whole body	mediastinum, thorax, whole body	Respiratory > Abdominal > Organs > Esophagus > General
674	lower extremity	lower extremity			Lower Extremity	lower extremity				whole body	whole body	Respiratory > Other_Anatomical_Structures > Extremities > Lower > General
675	lower half of the left chest	left chest	lower half		Chest							Respiratory > General > Chest > Laterality > Left > General
676	lower lateral chest wall	chest wall	lower lateral		Chest wall structure	Chest				thorax, whole body	thorax, whole body	Respiratory > General > Chest > Walls > General
677	lower left hemithorax	left hemithorax	lower		Hemithoracic structure			Thoracic Structures				Respiratory > General > Chest > Hemithorax > Laterality > Left
678	lower left lung	lower left lung			Lower zone of lung (C0559288)			Respiratory System				Respiratory > General > Zones > Lower > Laterality > Left
679	lower left superior vena cava	left superior vena cava	lower		Left superior vena cava							Respiratory > Cardiovascular > Great_Vessels > Vena_Cava > Superior > Laterality > Left
680	lower lobe	lower lobe			Structure of lower lobe of lung		Lungs	Respiratory System				Respiratory > General > Lung > Lobes > Lower > General
681	lower lobe probably left	left lower lobe			Structure of lower lobe of lung (C1261077)	Lungs		Respiratory System				Respiratory > General > Lung > Lobes > Lower > Laterality > Left
682	lower lobes	lower lobes			Structure of lower lobe of lung		Lungs	Respiratory System				Respiratory > General > Lung > Lobes > Lower > General
683	lower lobes bilaterally	lower lobes bilaterally			Structure of lower lobe of lung	Bilateral lung	Lungs	Respiratory System				Respiratory > General > Lung > Lobes > Lower > Laterality > Bilateral
684	lower lumbar spine	lumbar spine	lower		Lumbar spine structure			Skeletal System				Respiratory > Musculoskeletal > Bones > Spine > Lumbar > General
685	lower lung	lower lung			Lower zone of lung (C0559288)			Respiratory System				Respiratory > General > Lung > Zones > Lower > General
686	lower lung field	lower lung field			Lower zone of lung (C0559288)			Respiratory System				Respiratory > Other > Specific_Descriptions
687	lower lung fields	lower lung fields			Lower zone of lung (C0559288)			Respiratory System				Respiratory > General > Lung > Zones > Lower > General
688	lower lung fields bilaterally	lung fields bilaterally	lower		Lung							Respiratory > General > Lung > Laterality > Bilateral
689	lower lung zones	lower lung zones			Lower zone of lung (C0559288)			Respiratory System				Respiratory > General > Lung > Zones > Lower > General
690	lower lungs	lower lungs			Lower zone of lung (C0559288)			Respiratory System				Respiratory > General > Lung > Zones > Lower > General
691	lower lungs laterally	lower lungs	laterally		Lower zone of lung (C0559288)			Respiratory System				Respiratory > General > Lung > Zones > Lower > General
692	lower margin of the clavicles	clavicles	lower margin		Bone structure of clavicle			Musculoskeletal System				Respiratory > Musculoskeletal > Bones > Clavicle > General
693	lower medial clavicular heads	lower medial clavicular heads			Bone structure of clavicle			Musculoskeletal System				Respiratory > Musculoskeletal > Bones > Clavicle > Specific_Descriptions
694	lower mediastinum	mediastinum	lower		Mediastinum	mediastinum				thorax, whole body	thorax, whole body	Respiratory > Mediastinum > General
695	lower portion of the cervical spine	cervical spine	lower		Cervical spine			Skeletal System				Respiratory > Musculoskeletal > Bones > Spine > Cervical
696	lower portion of the mediastinum	mediastinum	lower		Mediastinum	mediastinum				thorax, whole body	thorax, whole body	Respiratory > Mediastinum > General
697	lower portion of the right hemithorax	right hemithorax	lower		Hemithoracic structure			Thoracic Structures				Respiratory > General > Chest > Hemithorax > Laterality > Right
698	lower portion of the svc	svc	lower		Superior vena cava structure							Respiratory > Cardiovascular > Great_Vessels > Vena_Cava > Superior > General
699	lower right	lower right			Lower zone of lung (C0559288)	Lungs	Lungs					Respiratory > Other > Specific_Descriptions
700	lower right atrium towards the ivc junction	lower right atrium	towards the ivc junction		Structure of low right atrium (C0456956)							Respiratory > Cardiovascular > Heart > Chambers > Atrium > Laterality > Right
701	lower right chest	right chest	lower		Right side of chest	Chest						Respiratory > General > Chest > Laterality > Right > General
702	lower right hemithorax	right hemithorax	lower		Hemithoracic structure			Thoracic Structures				Respiratory > General > Chest > Hemithorax > Laterality > Right
703	lower right hilus	right hilus	lower		right hilum	Hilar	Lung region	Respiratory System				Respiratory > General > Specific > Hila > Laterality > Right
704	lower superior vena cava	superior vena cava	lower		Superior vena cava structure	superior vena cava				mediastinum, thorax, whole body	mediastinum, thorax, whole body	Respiratory > Cardiovascular > Great_Vessels > Vena_Cava > Superior > General
705	lower svc	svc	lower		Superior vena cava structure							Respiratory > Cardiovascular > Great_Vessels > Vena_Cava > Superior > General
706	lower svc/cavoatrial junction	svc/cavoatrial junction	lower		Superior vena cava structure && cavoatrial junction							Respiratory > Cardiovascular > Great_Vessels > Vena_Cava > Superior > Junctions
707	lower t-spine	t-spine	lower		Thoracic spine structure			Skeletal System				Respiratory > Musculoskeletal > Bones > Spine > General
708	lower thoracic	thoracic	lower		Bone structure of thorax							Respiratory > General > Chest > General
709	lower thoracic and upper lumbar region	lower thoracic, upper lumbar			Thoracic region (surface region of back) (C1456859) && Lumbar Region							Respiratory > Musculoskeletal > Bones > Spine > Thoracolumbar
710	lower thoracic esophagus	thoracic esophagus	lower		Thoracic esophagus							Respiratory > Abdominal > Organs > Esophagus > Specific_Descriptions
711	lower thoracic levels	thoracic	lower		Bone structure of thorax							Respiratory > General > Chest > General
712	lower thoracic spine	thoracic spine	lower		Thoracic spine structure			Skeletal System				Respiratory > Musculoskeletal > Bones > Spine > Thoracic > General
713	lower thoracic vertebral bodies	thoracic vertebral bodies	lower		Structure of body of thoracic vertebra							Respiratory > Musculoskeletal > Bones > Spine > Specific_Descriptions
714	lower thoracic/lumbar spine	thoracic spine, lumbar spine	lower		Thoracic spine structure (C0581269) && Lumbar spine structure							Respiratory > Musculoskeletal > Bones > Spine > General
715	lower thorax	thorax	lower		Bone structure of thorax	thorax				whole body	whole body	Respiratory > General > Chest > General
716	lumbar spine	lumbar spine			Lumbar spine structure			Skeletal System				Respiratory > Musculoskeletal > Bones > Spine > Lumbar > General
717	lumbar vertebral bodies	lumbar vertebral bodies			Structure of body of lumbar vertebra							Respiratory > Musculoskeletal > Bones > Spine > Specific_Descriptions
718	lung	lung			Lung	Lung	Lungs	Respiratory System	thorax, whole body	thorax, whole body	thorax, whole body	Respiratory > General > Lung > General
719	lung apex	lung apex			Apical zone of lung			Respiratory System				Respiratory > General > Lung > Regions > Apical > General
720	lung apices	lung apices			Apical zone of lung			Respiratory System				Respiratory > General > Lung > Regions > Apical > General
721	lung apices bilaterally	lung bilaterally	apices		Lung							Respiratory > General > Lung > Laterality > Bilateral
722	lung base	lung base			Basal segment of lung (C0225704)			Respiratory System				Respiratory > General > Lung > Regions > Basal > General
723	lung bases	lung bases			Basal segment of lung (C0225704)			Respiratory System				Respiratory > General > Lung > Regions > Basal > Laterality > Bilateral
724	lung bases bilaterally	lung bases bilaterally			Basal zone of lung (C0734297)							Respiratory > General > Lung > Regions > Basal > Laterality > Bilateral
725	lung fields	lung fields			Lung			Respiratory System				Respiratory > General > Lung > General
726	lung parenchyma	lung parenchyma			Structure of parenchyma of lung (C0819757)			Respiratory System				Respiratory > General > Lung > Parenchyma
727	lung periphery	lung	periphery		Lung	Lung	Lungs	Respiratory System	thorax, whole body	thorax, whole body	thorax, whole body	Respiratory > General > Lung > General
728	lungs	lungs			Lung	Lung	Lungs	Respiratory System	thorax, whole body		thorax, whole body	Respiratory > General > Lung > General
729	lungs bilaterally	lungs bilaterally			Lung							Respiratory > General > Lung > Laterality > Bilateral
730	major fissure	major fissure			Major fissure (C0929208)	Lung		Respiratory System	thorax, whole body		thorax, whole body	Respiratory > General > Specific > Fissures > Major > General
731	major fissure on the right	major fissure on the right			Major fissure (C0929208)	Lung		Respiratory System	thorax, whole body		thorax, whole body	Respiratory > General > Specific > Fissures > Major > Laterality > Right
732	major fissures	major fissures			Major fissure (C0929208)	Lung		Respiratory System	thorax, whole body		thorax, whole body	Respiratory > General > Specific > Fissures > Major > General
733	manubrium	manubrium			Bone structure of manubrium	manubrium				anterior chest wall, chest wall, thorax, whole body	anterior chest wall, chest wall, thorax, whole body	Respiratory > Musculoskeletal > Bones > Sternum > Regions > Manubrium
734	manubrium and upper bodies	manubrium, upper bodies			Bone structure of manubrium && Upper body structure							Respiratory > Musculoskeletal > Bones > Sternum > Regions > Manubrium
735	medial	medial			-							Respiratory > Other > Anatomical_Directions > Medial
736	medial aspect	medial			-							Respiratory > Other > Anatomical_Directions > Medial
737	medial aspect of the left lung	medial aspect of the left lung			Middle zone of lung (C0559287)			Respiratory System				Respiratory > General > Zones > Middle > Laterality > Left
738	medial aspect of the left lung apex	left lung apex	medial		Apical zone of lung			Respiratory System				Respiratory > General > Specific > Apices > Laterality > Left
739	medial aspect of the right apex	right apex	medial		Apical zone of lung			Respiratory System				Respiratory > General > Specific > Apices > Laterality > Right
740	medial aspect of the right upper lobe	right upper lobe	medial		Structure of upper lobe of lung	Right lung lobe	Lungs	Respiratory System				Respiratory > General > Lung > Lobes > Upper > Laterality > Right
741	medial bilateral upper lobes	bilateral upper lobes	medial		Structure of upper lobe of lung			Respiratory System				Respiratory > General > Lobes > Upper > Laterality > Bilateral
742	medial left clavicle	left clavicle	medial		Bone structure of clavicle	left clavicle		Musculoskeletal System		left shoulder, left upper extremity, whole body	left shoulder, left upper extremity, whole body	Respiratory > Musculoskeletal > Bones > Clavicle > Laterality > Left
743	medial left diaphragm	left diaphragm	medial		Left Portion of the Diaphragm			Abdominal Structures				Respiratory > Diaphragm > Laterality > Left
744	medial left lower lobe	left lower lobe	medial		Structure of lower lobe of lung (C1261077)	Lungs		Respiratory System				Respiratory > General > Lung > Lobes > Lower > Laterality > Left
745	medial left upper quadrant	left upper quadrant	medial		Structure of left upper quadrant of abdomen							Respiratory > Abdominal > Regions > Quadrants > Upper_Left
746	medial right apex	right apex	medial		Apical zone of lung			Respiratory System				Respiratory > General > Specific > Apices > Laterality > Right
747	medial right apex/right suprahilar	medial right apex, right suprahilar			Apical zone of lung && Hilar							Respiratory > Other > Specific_Descriptions
748	medial right base	right base	medial		Basal segment of lung (C0225704)							Respiratory > General > Specific > Bases > Laterality > Right
749	medial right hemidiaphragm	right hemidiaphragm	medial		Right hemidiaphragm	right hemidiaphragm		Abdominal Structures		thorax, whole body	thorax, whole body	Respiratory > Diaphragm > Laterality > Right
750	medial right lower lung	right lower lung	medial		Right lower lung zone (C0929214)	Lungs		Respiratory System				Respiratory > General > Zones > Lower > Laterality > Right
751	medial right lung apex	right lung apex	medial		Apical zone of lung	Right lung	Lungs	Respiratory System	thorax, whole body		thorax, whole body	Respiratory > General > Specific > Apices > Laterality > Right
752	medial right upper lobe	right upper lobe	medial		Structure of upper lobe of lung	Right lung lobe	Lungs	Respiratory System				Respiratory > General > Lung > Lobes > Upper > Laterality > Right
753	medial segment of the right middle lobe	right middle lobe	medial		Structure of middle lobe of lung	Right lung lobe		Respiratory System				Respiratory > General > Lung > Lobes > Middle > Laterality > Right
754	medial surface of the left lung	medial surface of the left lung			Middle zone of lung (C0559287)			Respiratory System				Respiratory > General > Zones > Middle > Laterality > Left
755	medially at the right apex	right apex	medially		Apical zone of lung			Respiratory System				Respiratory > General > Specific > Apices > Laterality > Right
756	median	median			-							Respiratory > Other > Relative_Positions > Midline
757	mediastinal	mediastinal			Mediastinum							Respiratory > Mediastinum > General
758	mediastinal and hilar contours	mediastinal contour, hilar contour			Mediastinum && Hilar							Respiratory > Mediastinum > Borders
759	mediastinal border	mediastinal border			Mediastinum							Respiratory > Mediastinum > Borders
760	mediastinal border of the right pulmonary artery	right pulmonary artery	mediastinal border		Right pulmonary artery	right pulmonary artery				mediastinum, thorax, whole body	mediastinum, thorax, whole body	Respiratory > Cardiovascular > Great_Vessels > Pulmonary > Arteries
761	mediastinal border on the right	mediastinal border	right		Mediastinum							Respiratory > Mediastinum > Borders
762	mediastinal structures	mediastinal			Mediastinum							Respiratory > Mediastinum > General
763	mediastinum	mediastinum			Mediastinum	mediastinum				thorax, whole body	thorax, whole body	Respiratory > Mediastinum > General
764	mid	mid			-							Respiratory > Other > Specific_Descriptions
765	mid abdomen	mid abdomen			Structure of mid abdomen (surface region) (C0230167)			Abdominal Structures				Respiratory > Abdominal > Regions > Specific_Descriptions
766	mid and distal svc	svc	mid and distal		Superior vena cava structure							Respiratory > Cardiovascular > Great_Vessels > Vena_Cava > Superior > General
767	mid and left upper lung field	mid lung, left upper lung			Middle zone of lung (C0559287) && Upper zone of lung (C0559286)	Lungs	Lungs	Respiratory System				Respiratory > General > Zones > Combined > Specific_Descriptions
768	mid and lower lateral chest wall on the right	right lateral chest wall	mid	lower	Right lateral chest wall (C0818149)	Chest						Respiratory > General > Chest > Walls > Laterality > Right
769	mid and lower lung	mid lung, lower lung			Middle zone of lung (C0559287) && Lower zone of lung (C0559288)			Respiratory System				Respiratory > General > Zones > Combined > Specific_Descriptions
770	mid and lower lungs	mid lung, lower lung			Middle zone of lung (C0559287) && Lower zone of lung (C0559288)			Respiratory System				Respiratory > General > Zones > Combined > Specific_Descriptions
771	mid and lower lungs bilaterally	mid and lower lungs bilaterally			Middle zone of lung (C0559287) && Lower zone of lung (C0559288)							Respiratory > General > Lung > Zones > Combined > Laterality > Bilateral
772	mid and lower right lung	mid right lung, lower right lung			Middle zone of lung (C0559287) && Lower zone of lung (C0559288)			Respiratory System				Respiratory > General > Zones > Combined > Laterality > Right
773	mid and upper lung zone	mid lung, upper lung			Middle zone of lung (C0559287) && Upper zone of lung (C0559286)	Lungs	Lungs	Respiratory System				Respiratory > General > Zones > Combined > Specific_Descriptions
774	mid bodies of the stomach	bodies of the stomach	mid		Body of stomach (C0227230)	Stomach	Stomach	Abdominal Structures	peritoneal cavity, abdomen, whole body		peritoneal cavity, abdomen, whole body	Respiratory > Abdominal > Organs > Stomach > General
775	mid cervical region higher	cervical region	mid higher		Cervical region (surface region of back)							Respiratory > Musculoskeletal > Bones > Spine > Cervical
776	mid cervical spine	cervical spine	mid		Cervical spine			Skeletal System				Respiratory > Musculoskeletal > Bones > Spine > Cervical
777	mid chest superiorly	chest	mid superiorly		Chest							Respiratory > General > Chest > General
778	mid clavicular level	clavicular	mid		Bone structure of clavicle			Musculoskeletal System				Respiratory > Musculoskeletal > Bones > Clavicle > General
779	mid diaphysis of the right clavicle	right clavicle	mid diaphysis		Bone structure of clavicle	right clavicle		Musculoskeletal System		right shoulder, right upper extremity, whole body	right shoulder, right upper extremity, whole body	Respiratory > Musculoskeletal > Bones > Clavicle > Laterality > Right
780	mid dorsal vertebrae	vertebrae	mid dorsal		Body of vertebra							Respiratory > Musculoskeletal > Bones > Spine > Vertebrae > General
781	mid esophagus	esophagus	mid		Esophagus	esophagus				mediastinum, thorax, whole body	mediastinum, thorax, whole body	Respiratory > Abdominal > Organs > Esophagus > General
782	mid left	mid left			-							Respiratory > General > Zones > Middle > Laterality > Left
783	mid left lung	mid left lung			Middle zone of lung (C0559287)			Respiratory System				Respiratory > General > Lung > Regions > Mid > Laterality > Left
784	mid low svc	svc	mid low		Superior vena cava structure							Respiratory > Cardiovascular > Great_Vessels > Vena_Cava > Superior > General
785	mid lung	mid lung			Middle zone of lung (C0559287)			Respiratory System				Respiratory > General > Lung > Zones > Middle
786	mid lung regions	mid lung regions			Middle zone of lung (C0559287)			Respiratory System				Respiratory > General > Lung > Zones > Middle
787	mid lungs bilaterally	mid lungs bilaterally			Middle zone of lung (C0559287)							Respiratory > General > Lung > Zones > Middle > Laterality > Bilateral
788	mid portion in the esophagus	esophagus	mid		Esophagus	esophagus				mediastinum, thorax, whole body	mediastinum, thorax, whole body	Respiratory > Abdominal > Organs > Esophagus > General
789	mid portion of the esophagus	esophagus	mid		Esophagus	esophagus				mediastinum, thorax, whole body	mediastinum, thorax, whole body	Respiratory > Abdominal > Organs > Esophagus > General
790	mid portion of the left lung	mid portion of the left lung			Middle zone of lung (C0559287)			Respiratory System				Respiratory > General > Zones > Middle > Laterality > Left
791	mid portion of the mediastinum	mediastinum	mid		Mediastinum	mediastinum				thorax, whole body	thorax, whole body	Respiratory > Mediastinum > General
792	mid portion of the svc	svc	mid		Superior vena cava structure							Respiratory > Cardiovascular > Great_Vessels > Vena_Cava > Superior > General
793	mid right atrium	right atrium	mid		Right atrial structure	right atrium				heart, mediastinum, thorax, whole body	heart, mediastinum, thorax, whole body	Respiratory > Cardiovascular > Heart > Chambers > Atrium > Laterality > Right
794	mid right lung	mid right lung			Middle zone of lung (C0559287)			Respiratory System				Respiratory > General > Zones > Middle > Laterality > Right
795	mid right ventricular	right ventricular	mid		Right ventricular structure							Respiratory > Cardiovascular > Heart > Chambers > Ventricle > Laterality > Right
796	mid sternal	sternal	mid		Sternum			Musculoskeletal System				Respiratory > Musculoskeletal > Bones > Sternum > General
797	mid stomach	stomach	mid		Stomach structure	stomach		Abdominal Structures		peritoneal cavity, abdomen, whole body	peritoneal cavity, abdomen, whole body	Respiratory > Abdominal > Organs > Stomach > General
798	mid subclavian vein	subclavian vein	mid		Structure of subclavian vein							Respiratory > Cardiovascular > Great_Vessels > Subclavian > Vein > General
799	mid superior vena cava	superior vena cava	mid		Superior vena cava structure	superior vena cava				mediastinum, thorax, whole body	mediastinum, thorax, whole body	Respiratory > Cardiovascular > Great_Vessels > Vena_Cava > Superior > General
800	mid svc	svc	mid		Superior vena cava structure							Respiratory > Cardiovascular > Great_Vessels > Vena_Cava > Superior > General
801	mid svc level	svc	mid		Superior vena cava structure							Respiratory > Cardiovascular > Great_Vessels > Vena_Cava > Superior > General
802	mid t-spine	t-spine	mid		Thoracic spine structure			Skeletal System				Respiratory > Musculoskeletal > Bones > Spine > General
803	mid thoracic	thoracic	mid		Bone structure of thorax							Respiratory > General > Chest > General
804	mid thoracic spine	thoracic spine	mid		Thoracic spine structure			Skeletal System				Respiratory > Musculoskeletal > Bones > Spine > Thoracic > General
805	mid thoracic trachea	thoracic trachea	mid		Structure of thoracic trachea			Respiratory System				Respiratory > General > Specific > Trachea > Regions > Thoracic
806	mid thoracic vertebral	thoracic vertebral	mid		Structure of body of thoracic vertebra							Respiratory > Musculoskeletal > Bones > Spine > General
807	mid thoracic vertebral bodies	thoracic vertebral bodies	mid		Structure of body of thoracic vertebra							Respiratory > Musculoskeletal > Bones > Spine > Specific_Descriptions
808	mid to distal svc	svc	mid to distal		Superior vena cava structure							Respiratory > Cardiovascular > Great_Vessels > Vena_Cava > Superior > General
809	mid to low superior vena cava	superior vena cava	mid to low		Superior vena cava structure	superior vena cava				mediastinum, thorax, whole body	mediastinum, thorax, whole body	Respiratory > Cardiovascular > Great_Vessels > Vena_Cava > Superior > General
810	mid to low svc	svc	mid to low		Superior vena cava structure							Respiratory > Cardiovascular > Great_Vessels > Vena_Cava > Superior > General
811	mid to lower portion of the svc	svc	mid to lower		Superior vena cava structure							Respiratory > Cardiovascular > Great_Vessels > Vena_Cava > Superior > General
812	mid to lower svc	svc	mid to lower		Superior vena cava structure							Respiratory > Cardiovascular > Great_Vessels > Vena_Cava > Superior > General
813	mid to upper svc	svc	mid to upper		Superior vena cava structure							Respiratory > Cardiovascular > Great_Vessels > Vena_Cava > Superior > General
814	mid trachea	trachea	mid		Trachea	Trachea	Airways	Respiratory System	mediastinum, thorax, whole body	mediastinum, thorax, whole body	mediastinum, thorax, whole body	Respiratory > General > Specific > Trachea > General
815	mid-svc	mid-svc			Superior vena cava structure							Respiratory > Cardiovascular > Great_Vessels > Vena_Cava > Superior > Position > Mid
816	mid-thoracic	mid-thoracic			Bone structure of thorax							Respiratory > Musculoskeletal > Bones > Spine > Thoracic > Regions > Mid
817	mid-thoracic spine	mid-thoracic spine			Thoracic spine structure			Skeletal System				Respiratory > Musculoskeletal > Bones > Spine > Position > Mid
818	mid-thoracic vertebral bodies	mid-thoracic vertebral bodies			Structure of body of thoracic vertebra							Respiratory > Musculoskeletal > Bones > Spine > Position > Mid
819	mid-to-distal svc	svc	mid-to-distal		Superior vena cava structure							Respiratory > Cardiovascular > Great_Vessels > Vena_Cava > Superior > General
820	mid-to-low stomach	stomach	mid-to-low		Stomach structure	stomach		Abdominal Structures		peritoneal cavity, abdomen, whole body	peritoneal cavity, abdomen, whole body	Respiratory > Abdominal > Organs > Stomach > General
821	mid-to-low svc	svc	mid-to-low		Superior vena cava structure							Respiratory > Cardiovascular > Great_Vessels > Vena_Cava > Superior > General
822	mid-to-lower portion of the svc	svc	mid-to-lower		Superior vena cava structure							Respiratory > Cardiovascular > Great_Vessels > Vena_Cava > Superior > General
823	mid-to-lower svc	svc	mid-to-lower		Superior vena cava structure							Respiratory > Cardiovascular > Great_Vessels > Vena_Cava > Superior > General
824	mid-to-lower thoracic spine	thoracic spine	mid-to-lower		Thoracic spine structure			Skeletal System				Respiratory > Musculoskeletal > Bones > Spine > Thoracic > General
825	mid-to-lower thoracic vertebral bodies	thoracic vertebral bodies	mid-to-lower		Structure of body of thoracic vertebra							Respiratory > Musculoskeletal > Bones > Spine > Specific_Descriptions
826	mid-to-upper left lung	left lung	mid-to-upper		Lung	left lung		Respiratory System		thorax, whole body	thorax, whole body	Respiratory > General > Lung > Laterality > Left
827	mid-to-upper lungs	lungs	mid-to-upper		Lung	Lung	Lungs	Respiratory System	thorax, whole body		thorax, whole body	Respiratory > General > Lung > General
828	mid/low svc	svc	mid/low		Superior vena cava structure							Respiratory > Cardiovascular > Great_Vessels > Vena_Cava > Superior > General
829	mid/lower svc	svc	mid/lower		Superior vena cava structure							Respiratory > Cardiovascular > Great_Vessels > Vena_Cava > Superior > General
830	middle and lower lobe	middle lobe, lower lobe			Structure of middle lobe of lung && Structure of lower lobe of lung			Respiratory System				Respiratory > General > Lobes > Combined > General
831	middle and lower lobes	middle lobe, lower lobe			Structure of middle lobe of lung && Structure of lower lobe of lung			Respiratory System				Respiratory > General > Lobes > Combined > General
832	middle lobe	middle lobe			Structure of middle lobe of lung			Respiratory System				Respiratory > General > Lung > Lobes > Middle > General
833	middle mediastinum	mediastinum	middle		Mediastinum	mediastinum				thorax, whole body	thorax, whole body	Respiratory > Mediastinum > General
834	middle parts of the stomach	stomach	middle		Stomach structure	stomach		Abdominal Structures		peritoneal cavity, abdomen, whole body	peritoneal cavity, abdomen, whole body	Respiratory > Abdominal > Organs > Stomach > General
835	midline	midline			-							Respiratory > Other > Relative_Positions > Midline
836	midline in the upper chest	upper chest	midline		Surface region of upper chest							Respiratory > General > Chest > Laterality > Position > Upper > General
837	midline of the thorax	thorax	midline		Bone structure of thorax	thorax				whole body	whole body	Respiratory > General > Chest > General
838	midline upper abdomen	upper abdomen	midline		Upper abdomen structure (C2937240)			Abdominal Structures				Respiratory > Abdominal > General
839	minor fissure	minor fissure			Minor fissure	Lung		Respiratory System	thorax, whole body		thorax, whole body	Respiratory > General > Specific > Fissures > Minor > General
840	minor fissure on the right	minor fissure on the right			Minor fissure	Lung		Respiratory System	thorax, whole body		thorax, whole body	Respiratory > General > Specific > Fissures > Minor > Laterality > Right
841	mitral annulus	mitral annulus			Structure of anulus fibrosus of mitral orifice							Respiratory > Cardiovascular > Heart > Valves > Mitral
842	near cavoatrial junction	cavoatrial junction	near		cavoatrial junction							Respiratory > Cardiovascular > Great_Vessels > Vena_Cava > Superior > Junctions
843	near the lung apices	lung apices	near		Apical zone of lung			Respiratory System				Respiratory > General > Lung > Regions > Apical > General
844	neoesophagus	neoesophagus			-							Respiratory > Abdominal > Organs > Esophagus > Specific_Descriptions
845	oblique to the svc wall	svc wall			Wall of superior vena cava							Respiratory > Cardiovascular > Great_Vessels > Vena_Cava > Superior > Regions > Wall
846	obtuse marginal vein	obtuse marginal vein			-							Respiratory > Cardiovascular > Great_Vessels > Coronary > Specific
847	of bowel	bowel			Intestines							Respiratory > Abdominal > Organs > Intestines > Large > General
848	of the carina	carina			Structure of carina	carina		Respiratory System		mediastinum, thorax, whole body	mediastinum, thorax, whole body	Respiratory > General > Specific > Carina > General
849	old thoracentesis	old thoracentesis										Respiratory > Other > Medical_Procedures
850	origin of right stem bronchus	right stem bronchus			Bronchi							Respiratory > General > Specific > Bronchi > Specific
851	origin of the svc	svc			Superior vena cava structure							Respiratory > Cardiovascular > Great_Vessels > Vena_Cava > Superior > General
852	oropharynx	oropharynx			Entire oropharynx	oropharynx				suprahyoid neck, face, head, whole body	suprahyoid neck, face, head, whole body	Respiratory > Other_Anatomical_Structures > Pharynx
853	osseous structures	osseous structures			-							Respiratory > Musculoskeletal > Bones > General
854	other lung zones	lung zones	other		Lung			Respiratory System				Respiratory > General > Lung > General
855	other pleural surfaces	pleural surfaces			Pleura			Respiratory System				Respiratory > General > Specific > Pleura > Surfaces
856	over distal svc	svc	over distal		Superior vena cava structure							Respiratory > Cardiovascular > Great_Vessels > Vena_Cava > Superior > General
857	over the lower cervical spine	cervical spine	over the lower		Cervical spine			Skeletal System				Respiratory > Musculoskeletal > Bones > Spine > Cervical
858	over the spine	spine	over		Entire spine	spine		Skeletal System		whole body	whole body	Respiratory > Musculoskeletal > Bones > Spine > General
859	over the stomach	stomach	over		Stomach structure	stomach		Abdominal Structures		peritoneal cavity, abdomen, whole body	peritoneal cavity, abdomen, whole body	Respiratory > Abdominal > Organs > Stomach > General
860	overlying t7	t7	overlying		Body of vertebra							Respiratory > Musculoskeletal > Bones > Spine > Vertebrae > Specific > T7
861	overlying the svc	svc	overlying		Superior vena cava structure							Respiratory > Cardiovascular > Great_Vessels > Vena_Cava > Superior > General
862	paratracheal	paratracheal			Paratracheal							Respiratory > Mediastinum > Regions > Paratracheal
863	paratracheal mediastinum	mediastinum	paratracheal		Mediastinum	mediastinum				thorax, whole body	thorax, whole body	Respiratory > Mediastinum > General
864	partial lower lobe	lower lobe	partial		Structure of lower lobe of lung		Lungs	Respiratory System				Respiratory > General > Lung > Lobes > Lower > General
865	particularly the eight	particularly the eight										Respiratory > Musculoskeletal > Bones > Ribs > Specific_Descriptions
866	particularly the left lower lobe	left lower lobe			Structure of lower lobe of lung (C1261077)	Lungs		Respiratory System				Respiratory > General > Lung > Lobes > Lower > Laterality > Left
867	particularly the right	right			Right							Respiratory > Other > Relative_Positions > Right
868	perihilar	perihilar			Structure of perihilar region of lung							Respiratory > General > Specific > Perihilar > General
869	perihilar areas	perihilar			Structure of perihilar region of lung							Respiratory > General > Specific > Perihilar > General
870	perihilar left lung	left lung	perihilar		Lung	left lung		Respiratory System		thorax, whole body	thorax, whole body	Respiratory > General > Lung > Laterality > Left
871	perihilar portions of the right lung	right lung	perihilar		Lung	Right lung	Lungs	Respiratory System	thorax, whole body	thorax, whole body	thorax, whole body	Respiratory > General > Lung > Laterality > Right
872	perihilar region	perihilar			Structure of perihilar region of lung							Respiratory > General > Specific > Perihilar > General
873	perihilar right-sided	perihilar right-sided			Structure of perihilar region of lung							Respiratory > General > Specific > Perihilar > Laterality > Right
874	peripheral	peripheral			-							Respiratory > General > Lung > Regions > Peripheral > General
875	peripheral left upper lobe	left upper lobe	peripheral		Structure of upper lobe of lung			Respiratory System				Respiratory > General > Lung > Lobes > Upper > Laterality > Left
876	peripheral lingula	lingula	peripheral		Lingula	lingula				left lung, thorax, whole body	left lung, thorax, whole body	Respiratory > General > Zones > Lingula
877	peripheral right lower lobe	right lower lobe	peripheral		Structure of lower lobe of lung		Lungs	Respiratory System				Respiratory > General > Lung > Lobes > Lower > Laterality > Right
878	peripheral right upper lung zone	right upper lung zone	peripheral		Upper zone of lung (C0559286)	Right lung	Lungs	Respiratory System	thorax, whole body		thorax, whole body	Respiratory > General > Lobes > Upper > Laterality > Right
879	peripherally	peripherally			-							Respiratory > General > Lung > Regions > Peripheral > General
880	periphery of bilateral lungs	bilateral lungs	periphery		Lung			Respiratory System				Respiratory > General > Lung > Laterality > Bilateral
881	periphery of the left lung	left lung	periphery		Lung	left lung		Respiratory System		thorax, whole body	thorax, whole body	Respiratory > General > Lung > Laterality > Left
882	periphery of the lungs	lungs	periphery		Lung	Lung	Lungs	Respiratory System	thorax, whole body		thorax, whole body	Respiratory > General > Lung > General
883	periphery of the lungs mid field area	lungs mid field area	periphery		Middle zone of lung (C0559287)			Respiratory System				Respiratory > General > Lung > Zones > Middle
884	periphery of the right lower lung	right lower lung	periphery		Right lower lung zone (C0929214)	Lungs		Respiratory System				Respiratory > General > Zones > Lower > Laterality > Right
885	peritoneal catheter	peritoneal catheter										Respiratory > Abdominal > Organs > Specific_Descriptions
886	pharynx	pharynx			Entire pharynx	pharynx				neck, whole body	neck, whole body	Respiratory > Other_Anatomical_Structures > Pharynx
887	pleural space	pleural space			Pleural cavity			Respiratory System				Respiratory > General > Specific > Pleura > Space
888	pleuritic	pleuritic										Respiratory > General > Specific > Pleura > General
889	possibly bowel	bowel			Intestines							Respiratory > Abdominal > Organs > Intestines > Large > General
890	possibly colon	colon			Colon structure (body structure)							Respiratory > Abdominal > Organs > Intestines > Large > Colon > General
891	possibly the lower most sternotomy wire	possibly the lower most sternotomy wire			-							Respiratory > Musculoskeletal > Bones > Sternum > Specific_Descriptions
892	posterior	posterior			Bone structure of rib			Musculoskeletal System				Respiratory > Other > Anatomical_Directions > Posterior
893	posterior and 7th ribs	ribs	posterior 7th		Bone structure of rib	Ribs		Musculoskeletal System				Respiratory > Musculoskeletal > Bones > Ribs > General
894	posterior arch of the sixth and seventh right ribs	right ribs	posterior arch of the sixth	posterior arch of the seventh	Bone structure of rib	Right rib	Ribs	Musculoskeletal System				Respiratory > Musculoskeletal > Bones > Ribs > Laterality > Right
895	posterior aspect of one of the lower lobes	lower lobes	posterior		Structure of lower lobe of lung		Lungs	Musculoskeletal System				Respiratory > General > Lung > Lobes > Lower > General
896	posterior aspect of the fourth rib	rib	posterior aspect of the fourth		Bone structure of rib	Ribs	Ribs	Thoracic Structures				Respiratory > Musculoskeletal > Bones > Ribs > General
897	posterior aspect of the right hemithorax	right hemithorax	posterior		Hemithoracic structure			Thoracic Structures				Respiratory > General > Chest > Hemithorax > Laterality > Right
898	posterior chest wall	chest wall	posterior		Chest wall structure	Chest				thorax, whole body	thorax, whole body	Respiratory > General > Chest > Walls > General
899	posterior compartments	posterior compartments			Costophrenic angle							Respiratory > Other > Anatomical_Directions > Posterior
900	posterior costophrenic angles	costophrenic angles	posterior		Costophrenic angle			Respiratory System				Respiratory > General > Specific > Costophrenic_Angles > General
901	posterior inferior lower lung	lower lung	posterior inferior		Lower zone of lung (C0559288)			Respiratory System				Respiratory > General > Lung > Zones > Lower > General
902	posterior lateral left seventh rib	left rib	posterior lateral seventh		Bone structure of rib	Left Ribs	Ribs	Musculoskeletal System				Respiratory > Musculoskeletal > Bones > Ribs > Laterality > Left
903	posterior left eighth rib	left rib	posterior eighth		Bone structure of rib	Left Ribs	Ribs	Musculoskeletal System				Respiratory > Musculoskeletal > Bones > Ribs > Laterality > Left
904	posterior left lung base	left lung base	posterior		Basal segment of lung (C0225704)	Left Lung	Lungs	Respiratory System	thorax, whole body		thorax, whole body	Respiratory > General > Lung > Regions > Basal > Laterality > Left
905	posterior left sixth rib	left rib	posterior sixth		Bone structure of rib	Left Ribs	Ribs	Musculoskeletal System				Respiratory > Musculoskeletal > Bones > Ribs > Laterality > Left
906	posterior lung	lung	posterior		Lung	Lung	Lungs	Respiratory System	thorax, whole body	thorax, whole body	thorax, whole body	Respiratory > General > Lung > General
907	posterior pleural space	pleural space	posterior		Pleural cavity			Respiratory System				Respiratory > General > Specific > Pleura > Space
908	posterior portion of the left lower lobe	left lower lobe	posterior		Structure of lower lobe of lung (C1261077)	Lungs		Respiratory System				Respiratory > General > Lung > Lobes > Lower > Laterality > Left
909	posterior portions of the left lower lobe	left lower lobe	posterior		Structure of lower lobe of lung (C1261077)	Lungs		Respiratory System				Respiratory > General > Lung > Lobes > Lower > Laterality > Left
910	posterior rib	rib	posterior		Bone structure of rib	Ribs	Ribs	Musculoskeletal System				Respiratory > Musculoskeletal > Bones > Ribs > General
911	posterior right and 7th ribs	right ribs	posterior 7th		Bone structure of rib	Right rib	Ribs	Musculoskeletal System				Respiratory > Musculoskeletal > Bones > Ribs > Laterality > Right
912	posterior right eighth rib	right rib	posterior eighth		Bone structure of rib	Ribs		Musculoskeletal System				Respiratory > Musculoskeletal > Bones > Ribs > Laterality > Right
913	posterior right fourth rib	right rib	posterior fourth		Bone structure of rib	Ribs		Musculoskeletal System				Respiratory > Musculoskeletal > Bones > Ribs > Laterality > Right
914	posterior right lung base	right lung base	posterior		Basal segment of lung (C0225704)	Right lungs	Lungs	Respiratory System				Respiratory > General > Lung > Regions > Basal > Laterality > Right
915	posterior right ribs	right ribs	posterior		Bone structure of rib	Right rib	Ribs	Musculoskeletal System				Respiratory > Musculoskeletal > Bones > Ribs > Laterality > Right
916	posterior right seventh rib	right rib	posterior seventh		Bone structure of rib	Ribs		Musculoskeletal System				Respiratory > Musculoskeletal > Bones > Ribs > Laterality > Right
917	posterior right sixth and seventh ribs	right ribs	posterior sixth	posterior seventh	Bone structure of rib	Right rib	Ribs	Musculoskeletal System				Respiratory > Musculoskeletal > Bones > Ribs > Laterality > Right
918	posterior right upper	right upper	posterior		Upper zone of lung	Lungs	Lungs	Respiratory System				Respiratory > General > Zones > Upper > Laterality > Right
919	posterior segment of lower lobe	lower lobe	posterior segment		Structure of lower lobe of lung		Lungs	Adjacent Structures				Respiratory > General > Lung > Lobes > Lower > General
920	posterior shoulder	shoulder	posterior		Shoulder	Shoulder	Shoulder	Musculoskeletal System	upper extremity, whole body	upper extremity, whole body	upper extremity, whole body	Respiratory > Musculoskeletal > Joints > Shoulder > General
921	posterior to the sternum	sternum	posterior		Sternum	Sternum	Sternum	Respiratory System	anterior chest wall, chest wall, thorax, whole body	anterior chest wall, chest wall, thorax, whole body	anterior chest wall, chest wall, thorax, whole body	Respiratory > Musculoskeletal > Bones > Sternum > General
922	posterior to the trachea	trachea	posterior		Trachea	Trachea	Airways	Respiratory System	mediastinum, thorax, whole body	mediastinum, thorax, whole body	mediastinum, thorax, whole body	Respiratory > General > Specific > Trachea > General
923	posterior-inferior lung	lung	posterior-inferior		Lung	Lung	Lungs	Respiratory System	thorax, whole body	thorax, whole body	thorax, whole body	Respiratory > General > Lung > General
924	posteriorly	posteriorly			Lung			Respiratory System				Respiratory > Other > Anatomical_Directions > Posterior
925	posteroinferior lung	lung	posteroinferior		Lung	Lung	Lungs	Respiratory System	thorax, whole body	thorax, whole body	thorax, whole body	Respiratory > General > Lung > General
926	posterolateral and anterolateral aspects of right middle ribs	right ribs	posterolateral middle	anterolateral middle	Bone structure of rib	Right rib	Ribs	Musculoskeletal System				Respiratory > Musculoskeletal > Bones > Ribs > Laterality > Right
927	posterolateral and anterolateral portions of left middle ribs	left ribs	posterolateral middle	anterolateral middle	Bone structure of rib	Ribs		Musculoskeletal System				Respiratory > Musculoskeletal > Bones > Ribs > Laterality > Left
928	proximal	proximal										Respiratory > Other > Anatomical_Directions > Proximal
929	proximal and vessels	proximal, vessels			Descending aorta							Respiratory > Cardiovascular > Great_Vessels > Specific_Descriptions
930	proximal descending aorta	descending aorta	proximal		Descending aorta							Respiratory > Cardiovascular > Great_Vessels > Aorta > Regions > Descending
931	proximal duodenum	duodenum	proximal		Duodenum	duodenum				retroperitoneum, abdomen, whole body	retroperitoneum, abdomen, whole body	Respiratory > Abdominal > Organs > Intestines > Small > Duodenum
932	proximal esophagus	esophagus	proximal		Esophagus	esophagus		Abdominal Structures		mediastinum, thorax, whole body	mediastinum, thorax, whole body	Respiratory > Abdominal > Organs > Esophagus > General
933	proximal fundus of the stomach	fundus of the stomach	proximal		gastric fundus (C0017129)							Respiratory > Abdominal > Organs > Stomach > Regions > Fundus
934	proximal humeral	proximal humeral			Bone structure of proximal left humerus							Respiratory > Musculoskeletal > Bones > Humerus > Position > Proximal
935	proximal left humerus	left humerus	proximal		Left humerus	left humerus		Abdominal Structures		left arm, left upper extremity, whole body	left arm, left upper extremity, whole body	Respiratory > Musculoskeletal > Bones > Humerus > Laterality > Left
936	proximal parts of the stomach	stomach	proximal		Stomach structure	stomach		Abdominal Structures		peritoneal cavity, abdomen, whole body	peritoneal cavity, abdomen, whole body	Respiratory > Abdominal > Organs > Stomach > General
937	proximal portion of the bodies of the stomach	bodies of the stomach	proximal		Body of stomach (C0227230)	Stomach	Stomach	Abdominal Structures	peritoneal cavity, abdomen, whole body		peritoneal cavity, abdomen, whole body	Respiratory > Abdominal > Organs > Stomach > General
938	proximal pulmonary artery	pulmonary artery	proximal		Pulmonary artery structure	pulmonary artery				mediastinum, thorax, whole body	mediastinum, thorax, whole body	Respiratory > Cardiovascular > Great_Vessels > Pulmonary > Arteries
939	proximal right	proximal right			Right atrial structure							Respiratory > Other > Relative_Positions > Proximal
940	proximal right atrium	right atrium	proximal		Right atrial structure	right atrium				heart, mediastinum, thorax, whole body	heart, mediastinum, thorax, whole body	Respiratory > Cardiovascular > Heart > Chambers > Atrium > Laterality > Right
941	proximal right humerus	right humerus	proximal		right humerus	right humerus				right arm, right upper extremity, whole body	right arm, right upper extremity, whole body	Respiratory > Musculoskeletal > Bones > Humerus > Laterality > Right
942	proximal small bowel	small bowel	proximal		Stomach structure			Abdominal Structures				Respiratory > Abdominal > Organs > Intestines > Small > General
943	proximal stomach	stomach	proximal		Stomach structure	stomach				peritoneal cavity, abdomen, whole body	peritoneal cavity, abdomen, whole body	Respiratory > Abdominal > Organs > Stomach > General
944	proximal superior vena cava	superior vena cava	proximal		Superior vena cava structure	superior vena cava				mediastinum, thorax, whole body	mediastinum, thorax, whole body	Respiratory > Cardiovascular > Great_Vessels > Vena_Cava > Superior > General
945	proximal svc	svc	proximal		Superior vena cava structure							Respiratory > Cardiovascular > Great_Vessels > Vena_Cava > Superior > General
946	proximal thoracic esophagus	thoracic esophagus	proximal		Thoracic esophagus							Respiratory > Abdominal > Organs > Esophagus > Specific_Descriptions
947	proximal to its point of confluence with the subclavian vessel	subclavian vessels	proximal to its point of confluence		Trachea			Respiratory System				Respiratory > Cardiovascular > Great_Vessels > Subclavian > General
948	proximal trachea	trachea	proximal		Trachea	Trachea	Airways	Respiratory System	mediastinum, thorax, whole body	mediastinum, thorax, whole body	mediastinum, thorax, whole body	Respiratory > General > Specific > Trachea > General
949	proximal-most svc	svc	proximal-most		Superior vena cava structure							Respiratory > Cardiovascular > Great_Vessels > Vena_Cava > Superior > General
950	pulmonary artery	pulmonary artery			Pulmonary artery structure	pulmonary artery				mediastinum, thorax, whole body	mediastinum, thorax, whole body	Respiratory > Cardiovascular > Great_Vessels > Pulmonary > Arteries
951	pulmonary outflow tract	pulmonary outflow tract			Pulmonary artery structure							Respiratory > General > Lung > Pulmonary_Vasculature > Specific
952	pulmonary vascularity	pulmonary vascularity			Pulmonary vessels							Respiratory > General > Lung > Pulmonary_Vasculature > General
953	pulmonary vasculature	pulmonary vasculature			Pulmonary vessels							Respiratory > General > Lung > Pulmonary_Vasculature > General
954	pulmonary vessels	pulmonary vessels			Basal segment of lung (C0225704)			Respiratory System				Respiratory > General > Lung > Pulmonary_Vasculature > General
955	r lung base	r lung base										Respiratory > General > Lung > Regions > Basal > Laterality > Right
956	rectal	rectal			-							Respiratory > Other_Anatomical_Structures > Rectum
957	retrocardiac	retrocardiac			retrocardiac							Respiratory > General > Regions > Retrocardiac > General
958	retrocardiac area	retrocardiac			retrocardiac							Respiratory > General > Regions > Retrocardiac > General
959	retrocardiac clear space on the left	retrocardiac	left		retrocardiac							Respiratory > General > Regions > Retrocardiac > General
960	retrocardiac left lower lobe	left lower lobe	retrocardiac		Structure of lower lobe of lung (C1261077)	Lungs		Respiratory System				Respiratory > General > Lung > Lobes > Lower > Laterality > Left
961	retrocardiac left lung base	left lung base	retrocardiac		Basal segment of lung (C0225704)	Left Lung	Lungs	Respiratory System	thorax, whole body		thorax, whole body	Respiratory > General > Lung > Regions > Basal > Laterality > Left
962	retrocardiac lung areas	lung areas	retrocardiac		Lung	Lungs		Respiratory System				Respiratory > General > Lung > General
963	retrocardiac lung region	lung region	retrocardiac		-							Respiratory > General > Lung > General
964	retrocardiac on the right	retrocardiac	right		retrocardiac							Respiratory > General > Regions > Retrocardiac > General
965	retrocardiac posterior left lower lobe	left lower lobe	retrocardiac posterior		Structure of lower lobe of lung (C1261077)	Left lung lobe	Lungs	Respiratory System				Respiratory > General > Lung > Lobes > Lower > Laterality > Left
966	retrocardiac region	retrocardiac			retrocardiac							Respiratory > General > Regions > Retrocardiac > General
967	retrocardiac region on the left	retrocardiac	left		retrocardiac							Respiratory > General > Regions > Retrocardiac > General
968	retrocardiac space	retrocardiac			retrocardiac							Respiratory > General > Regions > Retrocardiac > General
969	retrosternal	retrosternal										Respiratory > Other > Anatomical_Directions > Retrosternal
970	retrosternal clear space	retrosternal										Respiratory > Other > Anatomical_Directions > Retrosternal
971	retrosternal region	retrosternal										Respiratory > Other > Anatomical_Directions > Retrosternal
972	retrosternal space	retrosternal										Respiratory > Other > Anatomical_Directions > Retrosternal
973	ribs	ribs			Bone structure of rib	Rib	Ribs	Musculoskeletal System				Respiratory > Musculoskeletal > Bones > Ribs > General
974	right	right			Right							Respiratory > Other > Relative_Positions > Right
975	right 8th rib	right rib	8th		Bone structure of rib	Right rib	Ribs	Musculoskeletal System				Respiratory > Musculoskeletal > Bones > Ribs > Laterality > Right
976	right abdomen	right abdomen			Abdomen	Abdomen	Abdomen	Abdominal Structures	whole body		whole body	Respiratory > Abdominal > Regions > Specific_Descriptions
977	right ac joint	right ac joint			Structure of right acromioclavicular joint (C0818475)							Respiratory > Musculoskeletal > Joints > Acromioclavicular > Laterality > Right
978	right acromioclavicular joint	right acromioclavicular joint			-	right acromioclavicular joint				right shoulder, right upper extremity, whole body	right shoulder, right upper extremity, whole body	Respiratory > Musculoskeletal > Joints > Acromioclavicular > Laterality > Right
979	right and left	right, left			Hemithoracic structure	Hemithorax		Thoracic Structures				Respiratory > Other > Relative_Positions > Combined
980	right and left hemithorax	right hemithorax, left hemithorax			Hemithoracic structure	Hemithorax		Thoracic Structures				Respiratory > General > Chest > Hemithorax > Laterality > Combined
981	right and left lower lobes	right lower lobe, left lower lobe			Lung	Lungs		Respiratory System				Respiratory > General > Lobes > Combined > Laterality > Right
982	right and left lung	right lung, left lung			Bone structure of rib	Ribs		Musculoskeletal System				Respiratory > General > Lung > Laterality > Bilateral
983	right anterior second rib interspace	right rib interspace	anterior second		Bone structure of rib	Right rib	Ribs	Musculoskeletal System				Respiratory > Musculoskeletal > Bones > Ribs > Laterality > Right
984	right apex	right apex			Apical zone of lung	Lungs		Respiratory System				Respiratory > General > Specific > Apices > Laterality > Right
985	right apical	right apical			Apical zone of lung	Lungs	Lungs	Respiratory System				Respiratory > General > Specific > Apices > Laterality > Right
986	right apical area	right apical			Apical zone of lung	Lungs	Lungs	Respiratory System				Respiratory > General > Specific > Apices > Laterality > Right
987	right apical lateral	right apical	lateral		Apical zone of lung	Lungs	Lungs	Respiratory System				Respiratory > General > Specific > Apices > Laterality > Right
988	right apicolateral	right apicolateral			Right atrial structure							Respiratory > General > Specific > Apices > Laterality > Right
989	right atrial	right atrial			Right atrial structure && Heart Ventricle							Respiratory > Cardiovascular > Heart > Chambers > Atrium > Laterality > Right
990	right atrial and ventricular	right atrial, ventricular			Right atrial structure							Respiratory > Cardiovascular > Heart > Chambers > Atrium > Laterality > Right
991	right atrium	right atrium			Right atrial structure	right atrium				heart, mediastinum, thorax, whole body	heart, mediastinum, thorax, whole body	Respiratory > Cardiovascular > Heart > Chambers > Atrium > Laterality > Right
992	right atrium and ventricle	right atrium, ventricle			Superior vena cava structure && Right atrial structure && Anatomical junction							Respiratory > Cardiovascular > Heart > Chambers > Atrium > Laterality > Right
993	right atrium-svc junction	right atrium-svc junction			Structure of right axillary region							Respiratory > Cardiovascular > Heart > Chambers > Atrium > Laterality > Right
994	right axilla	right axilla			Structure of right axillary region							Respiratory > Other_Anatomical_Structures > Axilla > Laterality > Right
995	right axillary region	right axillary			Right axillary vein							Respiratory > Other_Anatomical_Structures > Axilla > Laterality > Right
996	right axillary vein	right axillary vein			Basal segment of lung (C0225704)	right axillary vein				right shoulder, right upper extremity, whole body	right shoulder, right upper extremity, whole body	Respiratory > Cardiovascular > Great_Vessels > Subclavian > Axillary > Vein
997	right basal	right basal			Basal segment of lung (C0225704)	Right lung	Lungs	Respiratory System	thorax, whole body		thorax, whole body	Respiratory > General > Specific > Bases > Laterality > Right
998	right basal medial	right basal	medial		Basal segment of lung (C0225704)	Right lung	Lungs	Respiratory System	thorax, whole body		thorax, whole body	Respiratory > General > Specific > Bases > Laterality > Right
999	right basal pleural space	right basal pleural space			Basal segment of lung (C0225704)							Respiratory > General > Specific > Pleura > Laterality > Right
1000	right base	right base			Basal segment of lung (C0225704)	Lungs		Respiratory System				Respiratory > General > Specific > Bases > Laterality > Right
1001	right base laterally	right base	laterally		Basal segment of lung (C0225704)							Respiratory > General > Specific > Bases > Laterality > Right
1002	right base medially	right base	medially		Basal segment of lung (C0225704)							Respiratory > General > Specific > Bases > Laterality > Right
1003	right base posteriorly	right base	posteriorly		Basal segment of lung (C0225704)							Respiratory > General > Specific > Bases > Laterality > Right
1004	right basilar	right basilar			Basal segment of lung (C0225704)							Respiratory > General > Specific > Bases > Laterality > Right
1005	right bibasilar	right bibasilar			Right brachiocephalic vein							Respiratory > General > Specific > Bases > Laterality > Right
1006	right brachiocephalic vein	right brachiocephalic vein			Structure of brachiocephalic vein && Right axillary vein	right brachiocephalic vein				thorax, whole body	thorax, whole body	Respiratory > Cardiovascular > Great_Vessels > Brachiocephalic > Vein > Laterality > Right
1007	right brachiocephalic/axillary vein	right brachiocephalic/axillary vein			Structure of brachiocephalic vein && Structure of subclavian artery							Respiratory > Cardiovascular > Great_Vessels > Brachiocephalic > Vein > Laterality > Right
1008	right brachiocephalic/subclavian	right brachiocephalic/subclavian			Right breast && Structure of right axillary region							Respiratory > Cardiovascular > Great_Vessels > Brachiocephalic > Vein > Laterality > Right
1009	right breast and axillary region	right breast, right axillary			Structure of right bronchus	Airways		Respiratory System				Respiratory > Other_Anatomical_Structures > Axilla > Laterality > Right
1010	right bronchial	right bronchial			Structure of right bronchus							Respiratory > Other > Relative_Positions > Right
1011	right bronchus	right bronchus			Cardiac border							Respiratory > General > Specific > Bronchi > Laterality > Right > Main
1012	right cardiac border	right cardiac border			-							Respiratory > Cardiovascular > Heart > Regions > Border > Laterality > Right
1013	right cardiophrenic angle	right cardiophrenic angle			-							Respiratory > Cardiovascular > Heart > Regions > Cardiophrenic
1014	right cardiophrenic region	right cardiophrenic region			-							Respiratory > Cardiovascular > Heart > Regions > Cardiophrenic
1015	right cardiophrenic sulcus	right cardiophrenic sulcus			cavoatrial junction							Respiratory > Cardiovascular > Heart > Regions > Cardiophrenic
1016	right cavoatrial junction	cavoatrial junction	right		cavoatrial junction							Respiratory > Cardiovascular > Great_Vessels > Vena_Cava > Superior > Junctions
1017	right central	right central			Cervical region (surface region of back) && Thoracic region (surface region of back)							Respiratory > Other > Relative_Positions > Right
1018	right cervical and thoracic region	right cervical, right thoracic			Cervical region (surface region of back) && Thoracic region (surface region of back)							Respiratory > Other > Relative_Positions > Right
1019	right chest	right chest			Right side of chest	Chest						Respiratory > General > Chest > Laterality > Right > General
1020	right chest surgical	right chest			Right side of chest	Chest						Respiratory > General > Chest > Laterality > Right > General
1021	right chest tube	right chest tube										Respiratory > General > Chest > Walls > Specific_Descriptions
1022	right chest wall	right chest wall			Chest wall structure	Chest		Musculoskeletal System				Respiratory > General > Chest > Walls > Laterality > Right
1023	right clavicle	right clavicle			Bone structure of clavicle	Clavicles		Musculoskeletal System		right shoulder, right upper extremity, whole body	right shoulder, right upper extremity, whole body	Respiratory > Musculoskeletal > Bones > Clavicle > Laterality > Right
1024	right clavicular	right clavicular			Structure of right clavicular region							Respiratory > Musculoskeletal > Bones > Clavicle > Laterality > Right
1025	right coracoclavicular region	right coracoclavicular region			Right costodiaphragmatic recess							Respiratory > Other_Anatomical_Structures > Specific_Descriptions
1026	right costophrenic	right costophrenic			Right costodiaphragmatic recess							Respiratory > General > Specific > Costophrenic_Angles > Laterality > Right
1027	right costophrenic angle	right costophrenic angle			Right costodiaphragmatic recess							Respiratory > General > Specific > Costophrenic_Angles > Laterality > Right
1028	right costophrenic sinus	right costophrenic sinus			Right costodiaphragmatic recess							Respiratory > General > Specific > Costophrenic_Angles > Laterality > Right
1029	right costophrenic sulcus	right costophrenic sulcus			Right costodiaphragmatic recess							Respiratory > General > Specific > Costophrenic_Angles > Laterality > Right
1030	right descending pulmonary artery	right pulmonary artery	descending		Right pulmonary artery	right pulmonary artery				mediastinum, thorax, whole body	mediastinum, thorax, whole body	Respiratory > Cardiovascular > Great_Vessels > Pulmonary > Arteries
1031	right diaphragm	right diaphragm			Right Portion of the Diaphragm	Diaphragm		Abdominal Structures	thorax, whole body		thorax, whole body	Respiratory > Diaphragm > Laterality > Right
1032	right diaphragmatic region	right diaphragmatic region			Apical zone of lung	Lungs		Respiratory System				Respiratory > Diaphragm > Laterality > Right
1033	right far apical region	right apical	far		Apical zone of lung	Lungs	Lungs	Respiratory System				Respiratory > General > Specific > Apices > Laterality > Right
1034	right femoral	right femoral			Bone structure of rib	Ribs		Musculoskeletal System				Respiratory > Other_Anatomical_Structures > Specific_Descriptions
1035	right fifth rib	right rib	fifth		Bone structure of rib	Right rib	Ribs	Musculoskeletal System				Respiratory > Musculoskeletal > Bones > Ribs > Laterality > Right
1036	right first costochondral junction	right first costochondral junction			Fissure of lung							Respiratory > Musculoskeletal > Bones > Ribs > Specific_Descriptions
1037	right fissural	right fissural			Fissure of lung							Respiratory > General > Specific > Fissures > Laterality > Right
1038	right fissure	right fissure			Fissure of lung	Fissure of lung	Lung	Respiratory System				Respiratory > General > Specific > Fissures > Laterality > Right
1039	right flank	right flank			Bone structure of rib	Ribs		Musculoskeletal System				Respiratory > Abdominal > Regions > Flank > Laterality > Right
1040	right fourth rib	right rib	fourth		Bone structure of rib	Right rib	Ribs	Musculoskeletal System				Respiratory > Musculoskeletal > Bones > Ribs > Laterality > Right
1041	right fourth rib posteriorly	right rib posteriorly	fourth		Right glenohumeral joint							Respiratory > Musculoskeletal > Bones > Ribs > Laterality > Right
1042	right glenohumeral joint	right glenohumeral joint			Structure of right glenoid	right glenohumeral joint				right shoulder, right upper extremity, whole body	right shoulder, right upper extremity, whole body	Respiratory > Musculoskeletal > Joints > Glenohumeral > Laterality > Right
1043	right glenoid	right glenoid			Right side of heart							Respiratory > Musculoskeletal > Joints > Glenoid > Laterality > Right
1044	right heart	right heart			Cardiac border							Respiratory > Cardiovascular > Heart > Laterality > Right
1045	right heart border	right heart border			Cardiac border	Hemithorax		Thoracic Structures				Respiratory > Cardiovascular > Heart > Regions > Border > Laterality > Right
1046	right hemi thorax	right hemithorax			Hemithoracic structure	Hemithorax		Thoracic Structures				Respiratory > General > Chest > Hemithorax > Laterality > Right
1047	right hemidiaphragm	right hemidiaphragm			Right hemidiaphragm	Diaphragm		Abdominal Structures	thorax, whole body	thorax, whole body	thorax, whole body	Respiratory > Diaphragm > Laterality > Right
1048	right hemidiaphragm medially	right hemidiaphragm	medially		Right hemidiaphragm	Diaphragm		Abdominal Structures	thorax, whole body	thorax, whole body	thorax, whole body	Respiratory > Diaphragm > Laterality > Right
1049	right hemidiaphragmatic	right hemidiaphragmatic			Hemithoracic structure	Hemithorax		Thoracic Structures				Respiratory > Diaphragm > Laterality > Right
1050	right hemithorax	right hemithorax			Hemithoracic structure	Hemithorax		Thoracic Structures				Respiratory > General > Chest > Hemithorax > Laterality > Right
1051	right hemithorax base	right hemithorax	base		Hemithoracic structure	Hemithorax		Thoracic Structures				Respiratory > General > Chest > Hemithorax > Laterality > Right
1052	right hemithorax mid lung field	right hemithorax	mid lung field		Hemithoracic structure	Hemithorax		Thoracic Structures				Respiratory > General > Chest > Hemithorax > Laterality > Right
1053	right hila	right hila			Hilar	Lung region		Respiratory System				Respiratory > General > Specific > Hila > Laterality > Right
1054	right hilar	right hilar			Hilum C0929176 && Structure of perihilar region of lung							Respiratory > General > Specific > Hila > Laterality > Right
1055	right hilar and perihilar	right hilar, right perihilar			Hilar	Lung region		Respiratory System				Respiratory > General > Specific > Hila > Laterality > Right
1056	right hilar lower region	right hilar lower region			Hilar	Lung region		Respiratory System				Respiratory > General > Specific > Hila > Laterality > Right
1057	right hilar region	right hilar region			right hilum	Hilar	Lung region	Respiratory System				Respiratory > General > Specific > Hila > Laterality > Right
1058	right hilum	right hilum			Hilar	Lung region		Respiratory System				Respiratory > General > Specific > Hila > Laterality > Right
1059	right hilus	right hilus			right hilum	Hilar	Lung region	Respiratory System				Respiratory > General > Specific > Hila > Laterality > Right
1060	right humeral	right humeral			Right humerus							Respiratory > Musculoskeletal > Bones > Humerus > Laterality > Right
1061	right humeral diaphysis	right humeral	diaphysis		Right humerus							Respiratory > Musculoskeletal > Bones > Humerus > Laterality > Right
1062	right humeral surgical	right humeral surgical			Right humerus							Respiratory > Musculoskeletal > Bones > Humerus > Laterality > Right
1063	right humerus	right humerus			right humerus	right humerus				right arm, right upper extremity, whole body	right arm, right upper extremity, whole body	Respiratory > Musculoskeletal > Bones > Humerus > Laterality > Right
1064	right hypochrondriac region	right hypochrondriac			Hilar							Respiratory > Abdominal > Regions > Specific_Descriptions
1065	right infrahilar	right infrahilar			Hilar							Respiratory > General > Specific > Infrahilar > Laterality > Right
1066	right infrahilar area	right infrahilar area			Hilar							Respiratory > General > Specific > Infrahilar > Laterality > Right
1067	right infrahilar region	right infrahilar region			Interlobar part of right pulmonary artery							Respiratory > General > Specific > Infrahilar > Laterality > Right
1068	right interlobar artery	right interlobar artery			Fissure of lung							Respiratory > Cardiovascular > Great_Vessels > Pulmonary > Arteries
1069	right interlobar fissures	right interlobar fissures			Fissure of lung	Fissure of lung	Lung	Respiratory System				Respiratory > General > Specific > Fissures > Laterality > Right
1070	right internal jugular	right internal jugular			Right internal jugular vein							Respiratory > Cardiovascular > Great_Vessels > Jugular > Internal > Laterality > Right
1071	right internal jugular line	right internal jugular			Right internal jugular vein							Respiratory > Cardiovascular > Great_Vessels > Jugular > Internal > Laterality > Right
1072	right internal jugular sheath location	right internal jugular			Right internal jugular vein							Respiratory > Cardiovascular > Great_Vessels > Jugular > Internal > Laterality > Right
1073	right internal jugular vein	right internal jugular vein			Right internal jugular vein							Respiratory > Cardiovascular > Great_Vessels > Jugular > Internal > Laterality > Right
1074	right lateral	right lateral			pleural cavity	Pleural		Respiratory System				Respiratory > Other > Relative_Positions > Right
1075	right lateral and posterior pleural sinus	pleural sinus	right lateral	right posterior	pleural cavity	Pleural		Respiratory System				Respiratory > General > Specific > Pleura > Space
1076	right lateral and posterior pleural space	pleural space	right lateral	right posterior	Pleural cavity			Respiratory System				Respiratory > General > Specific > Pleura > Space
1077	right lateral chest wall	right lateral chest wall			Right lateral chest wall (C0818149)	Chest		Respiratory System				Respiratory > General > Chest > Walls > Laterality > Right
1078	right lateral lung	right lung	lateral		Lung	Right lung	Lungs	Respiratory System	thorax, whole body	thorax, whole body	thorax, whole body	Respiratory > General > Lung > Laterality > Right
1079	right lateral lung bases	right lung bases	lateral		Basal segment of lung (C0225704)	Right lung	Lungs	Respiratory System	thorax, whole body		thorax, whole body	Respiratory > General > Lung > Regions > Basal > Laterality > Right
1080	right lateral mid lung	right mid lung	lateral		Middle zone of lung (C0559287)	Right lung	Lungs	Respiratory System	thorax, whole body		thorax, whole body	Respiratory > General > Zones > Middle > Laterality > Right
1081	right lateral pleural sinus	right lateral pleural sinus			Costophrenic angle							Respiratory > General > Specific > Pleura > Laterality > Right
1082	right lateral posterior costophrenic angle	right lateral posterior costophrenic angle	posterior		Rib Cage	Ribs		Musculoskeletal System				Respiratory > General > Specific > Costophrenic_Angles > Laterality > Right
1083	right lateral rib cage	right lateral rib cage			Rib Cage	Right rib	Ribs	Musculoskeletal System				Respiratory > Musculoskeletal > Bones > Ribs > Specific_Descriptions
1084	right lateral upper abdominal wall	abdominal wall	right lateral upper		Upper zone of lung (C0559286)	Lungs		Respiratory System				Respiratory > Abdominal > Walls
1085	right lateral upper lung	right upper lung	lateral		Upper zone of lung (C0559286)	Right lung	Lungs	Respiratory System	thorax, whole body		thorax, whole body	Respiratory > General > Lobes > Upper > Laterality > Right
1086	right lower	right lower			Middle zone of lung (C0559287) && Lower zone of lung (C0559288)	Lungs		Respiratory System				Respiratory > General > Lobes > Lower > Laterality > Right
1087	right lower and medial lung	right lower lung, right medial lung			Structure of lower lobe of lung && Structure of middle lobe of lung	Lungs		Respiratory System				Respiratory > General > Zones > Lower > Laterality > Specific_Descriptions
1088	right lower and middle lobes	right lower lobe, right middle lobe			Chest							Respiratory > General > Lobes > Combined > Laterality > Right
1089	right lower chest	right lower chest			Chest							Respiratory > General > Chest > Laterality > Right > Position > Lower
1090	right lower chest wall	right lower chest wall			Chest wall structure	Chest						Respiratory > General > Chest > Walls > Laterality > Right
1091	right lower extremity	right lower extremity			Hemithoracic structure	Hemithorax		Thoracic Structures		whole body	whole body	Respiratory > Other_Anatomical_Structures > Extremities > Lower > Laterality > Right
1092	right lower hemithorax	right hemithorax	lower		Hemithoracic structure	Hemithorax		Thoracic Structures				Respiratory > General > Chest > Hemithorax > Laterality > Right
1093	right lower hemithorax medially	right hemithorax	lower medially		Hemithoracic structure	Hemithorax		Thoracic Structures				Respiratory > General > Chest > Hemithorax > Laterality > Right
1094	right lower lateral hemithorax	right hemithorax	lower lateral		Hemithoracic structure	Hemithorax		Thoracic Structures				Respiratory > General > Chest > Hemithorax > Laterality > Right
1095	right lower lobe	right lower lobe			Structure of lower lobe of lung	Right lung lobe		Respiratory System				Respiratory > General > Lung > Lobes > Lower > Laterality > Right
1096	right lower lobe abscess	right lower lobe			Structure of lower lobe of lung	Right lung lobe		Respiratory System				Respiratory > General > Lung > Lobes > Lower > Laterality > Right
1097	right lower lobe medial	right lower lobe	medial		Structure of lower lobe of lung	Right lung lobe		Respiratory System				Respiratory > General > Lung > Lobes > Lower > Laterality > Right
1098	right lower lobe medially	right lower lobe	medially		Structure of lower lobe of lung	Right lung lobe		Respiratory System				Respiratory > General > Lung > Lobes > Lower > Laterality > Right
1099	right lower lobes	right lower lobes			Structure of lower lobe of lung	Lungs		Respiratory System				Respiratory > General > Lobes > Lower > Laterality > Right
1100	right lower lung	right lower lung			Right lower lung zone (C0929214)	Right lung	Lungs	Respiratory System	thorax, whole body		thorax, whole body	Respiratory > General > Zones > Lower > Laterality > Right
1101	right lower lung field	right lower lung field			Lower zone of lung (C0559288)	Lungs		Respiratory System				Respiratory > General > Zones > Lower > Laterality > Right
1102	right lower lung zone	right lower lung zone			Lower zone of lung (C0559288)	Lungs		Respiratory System				Respiratory > General > Zones > Lower > Laterality > Right
1103	right lower lungs	right lower lungs			Lower zone of lung (C0559288)	Lungs		Respiratory System				Respiratory > General > Zones > Lower > Laterality > Right
1104	right lower medial lung	right lower lung	medial		Right lower lung zone (C0929214)	Right lung	Lungs	Respiratory System	thorax, whole body		thorax, whole body	Respiratory > General > Zones > Lower > Laterality > Right
1105	right lower paracardiac region	right lower paracardiac region			Pleural cavity	Pleural		Respiratory System				Respiratory > General > Regions > Other > Laterality > Right
1106	right lower pleural space	right lower pleural space			Hilar	Lung region		Respiratory System				Respiratory > General > Regions > Other > Laterality > Right
1107	right lower pole of the hilus	right lower pole of the hilus			Tracheobronchial angle	Airways		Respiratory System				Respiratory > General > Regions > Other > Laterality > Right
1108	right lower tracheobronchial angle	tracheobronchial angle	right lower		Lung	Lungs		Respiratory System				Respiratory > Other > Specific_Descriptions
1109	right lung	right lung			Lung	Right lung	Lungs	Respiratory System	thorax, whole body	thorax, whole body	thorax, whole body	Respiratory > General > Lung > Laterality > Right
1110	right lung and chest wall	right lung, chest wall			Chest wall structure	Chest		Respiratory System				Respiratory > Other > Specific_Descriptions
1111	right lung apex	right lung apex			Apical zone of lung	Right lung	Lungs	Respiratory System	thorax, whole body		thorax, whole body	Respiratory > General > Specific > Apices > Laterality > Right
1112	right lung base	right lung base			Basal segment of lung (C0225704)	Right lungs	Lungs	Respiratory System				Respiratory > General > Lung > Regions > Basal > Laterality > Right
1113	right lung base medially	right lung base	medially		Basal segment of lung (C0225704)	Right lungs	Lungs	Respiratory System				Respiratory > General > Lung > Regions > Basal > Laterality > Right
1114	right lung bases	right lung bases			Basal segment of lung (C0225704)	Right lung	Lungs	Respiratory System	thorax, whole body		thorax, whole body	Respiratory > General > Lung > Regions > Basal > Laterality > Right
1115	right lung basilar	right lung basilar			Basal segment of lung (C0225704)	Right lung lobe		Respiratory System				Respiratory > General > Lung > Regions > Basal > Laterality > Right
1116	right lung lower lobe	right lung lower lobe			Right major fissure (C0929209)							Respiratory > General > Lobes > Lower > Laterality > Right
1117	right major fissure	right major fissure			Major fissure (C0929208)	Fissure of lung	Lung	Respiratory System				Respiratory > General > Specific > Fissures > Major > Laterality > Right
1118	right mediastinal	right mediastinal			Mediastinum && Cardiac border							Respiratory > Mediastinum > Laterality > Right
1119	right mediastinal and cardiac borders	right mediastinal border, cardiac border			Mediastinum							Respiratory > Mediastinum > Borders
1120	right mediastinum	right mediastinum			Structure of right side of abdomen (C1562301)	Abdomen	Abdomen	Abdominal Structures	whole body		whole body	Respiratory > Mediastinum > Laterality > Right
1121	right mid abdomen	right mid abdomen			Abdomen	Abdomen	Abdomen	Abdominal Structures	whole body		whole body	Respiratory > Other > Specific_Descriptions
1122	right mid and infrahilar area	right mid, infrahilar			Structure of middle lobe of lung && Structure of lower lobe of lung	Right lung lobe	Lungs	Respiratory System				Respiratory > General > Zones > Combined > Laterality > Right
1123	right mid and lower lobe	right mid lobe, right lower lobe			Middle zone of lung (C0559287) && Lower zone of lung (C0559288)	Right lung	Lungs	Respiratory System	thorax, whole body		thorax, whole body	Respiratory > General > Lobes > Combined > Laterality > Right
1124	right mid and lower lung	right mid lung, right lower lung			Middle zone of lung (C0559287) && Lower zone of lung (C0559288)	Right lung	Lungs	Respiratory System	thorax, whole body		thorax, whole body	Respiratory > General > Zones > Combined > Laterality > Right
1125	right mid and lower portion	right mid, right lower			Middle zone of lung (C0559287) && Lower zone of lung (C0559288)	Right lung	Lungs	Respiratory System	thorax, whole body		thorax, whole body	Respiratory > General > Zones > Combined > Laterality > Right
1126	right mid and lower zones	right mid, right lower			Middle zone of lung (C0559287) && Lower zone of lung (C0559288)	Right lung	Lungs	Respiratory System	thorax, whole body		thorax, whole body	Respiratory > General > Zones > Combined > Laterality > Right
1127	right mid chest	right mid chest			Bone structure of clavicle	Right clavicles	Clavicles	Musculoskeletal System				Respiratory > General > Chest > Laterality > Right > Position > Middle
1128	right mid clavicular	right clavicular	mid		Structure of right clavicular region							Respiratory > Musculoskeletal > Bones > Clavicle > Laterality > Right
1129	right mid lower lung	right lower lung	mid		Right lower lung zone (C0929214)	Right lung	Lungs	Respiratory System	thorax, whole body		thorax, whole body	Respiratory > General > Zones > Lower > Laterality > Right
1130	right mid lower zone	right mid zone, right lower zone			Middle zone of lung (C0559287)	Right lung	Lungs	Respiratory System	thorax, whole body		thorax, whole body	Respiratory > General > Zones > Combined > Laterality > Right
1131	right mid lung	right mid lung			Middle zone of lung (C0559287)	Right lung	Lungs	Respiratory System	thorax, whole body		thorax, whole body	Respiratory > General > Zones > Middle > Laterality > Right
1132	right mid lung field	right mid lung field			Middle zone of lung (C0559287)	Right lung	Lungs	Respiratory System	thorax, whole body		thorax, whole body	Respiratory > General > Zones > Middle > Laterality > Right
1133	right mid lung fissure	right mid lung	fissure		Middle zone of lung (C0559287)	Right lung	Lungs	Respiratory System	thorax, whole body		thorax, whole body	Respiratory > General > Zones > Middle > Laterality > Right
1134	right mid lung laterally	right mid lung	laterally		Middle zone of lung (C0559287)	Right lung	Lungs	Respiratory System	thorax, whole body		thorax, whole body	Respiratory > General > Zones > Middle > Laterality > Right
1135	right mid lung near the chest tube	right mid lung	near the chest tube		Middle zone of lung (C0559287)	Right lung	Lungs	Respiratory System	thorax, whole body		thorax, whole body	Respiratory > General > Zones > Middle > Laterality > Right
1136	right mid lung zone	right mid lung zone			Middle zone of lung (C0559287)	Right lung	Lungs	Respiratory System	thorax, whole body		thorax, whole body	Respiratory > General > Zones > Middle > Laterality > Right
1137	right mid mediastinum	right mid mediastinum			Bone structure of thorax							Respiratory > Mediastinum > Laterality > Right
1138	right mid thoracic	right mid thoracic			Right lung	Right lung	Lungs	Respiratory System	thorax, whole body		thorax, whole body	Respiratory > General > Zones > Middle > Laterality > Right
1139	right mid to lower lung	right lung	mid to lower		Lung	Right lung	Lungs	Respiratory System	thorax, whole body	thorax, whole body	thorax, whole body	Respiratory > General > Lung > Laterality > Right
1140	right mid to lower lung field	right lung field	mid to lower		Right lung	Right lung	Lungs	Respiratory System	thorax, whole body		thorax, whole body	Respiratory > General > Regions > Other > Laterality > Right
1141	right mid to upper lung	right lung	mid to upper		Lung	Right lung	Lungs	Respiratory System	thorax, whole body	thorax, whole body	thorax, whole body	Respiratory > General > Lung > Laterality > Right
1142	right mid upper and left upper lungs	right mid upper lung, left upper lung										Respiratory > General > Zones > Combined > Specific_Descriptions
1143	right mid zone	right mid			Middle zone of lung (C0559287)	Right lung	Lungs	Respiratory System	thorax, whole body		thorax, whole body	Respiratory > General > Lung > Regions > Mid > Laterality > Right
1144	right mid-lung	right mid-lung			Right lung	Right lung	Lungs	Respiratory System	thorax, whole body		thorax, whole body	Respiratory > General > Zones > Middle > Laterality > Right
1145	right mid-to-lower lateral lung	right lateral lung	mid-to-lower		Right lung	Right lung	Lungs	Respiratory System	thorax, whole body		thorax, whole body	Respiratory > Other > Relative_Positions > Right
1146	right mid-to-lower lung	right lung	mid-to-lower		Lung	Right lung	Lungs	Respiratory System	thorax, whole body	thorax, whole body	thorax, whole body	Respiratory > General > Lung > Laterality > Right
1147	right mid/lower	right mid, right lower			Middle zone of lung (C0559287) && Lower zone of lung (C0559288)	Right lung	Lungs	Respiratory System	thorax, whole body		thorax, whole body	Respiratory > General > Zones > Combined > Laterality > Right
1148	right mid/lower lung	right mid lung, right lower lung			Middle zone of lung (C0559287) && Lower zone of lung (C0559288)	Right lung	Lungs	Respiratory System	thorax, whole body		thorax, whole body	Respiratory > General > Zones > Combined > Laterality > Right
1149	right middle and lower	right middle, right lower			Structure of middle lobe of lung && Structure of lower lobe of lung	Right lung lobe	Lungs	Respiratory System				Respiratory > General > Lobes > Combined > Laterality > Right
1150	right middle and lower lobe	right middle lobe, right lower lobe			Structure of middle lobe of lung && Structure of lower lobe of lung	Right lung lobe	Lungs	Respiratory System				Respiratory > General > Lobes > Middle > Specific_Descriptions
1151	right middle and lower lobes	right middle lobe, right lower lobe			Structure of middle lobe of lung && Structure of lower lobe of lung	Right lung lobe	Lungs	Respiratory System				Respiratory > General > Lobes > Middle > Specific_Descriptions
1152	right middle and lower lung	right middle lung, right lower lung			Middle zone of lung (C0559287) && Lower zone of lung (C0559288)	Right lung	Lungs	Respiratory System	thorax, whole body		thorax, whole body	Respiratory > General > Zones > Lower > Laterality > Specific_Descriptions
1153	right middle and lower lung zones	right middle lung, right lower lung			Middle zone of lung (C0559287) && Lower zone of lung (C0559288)	Right lung	Lungs	Respiratory System	thorax, whole body		thorax, whole body	Respiratory > General > Zones > Lower > Laterality > Specific_Descriptions
1154	right middle basal	right middle	basal		Middle zone of lung (C0559287)							Respiratory > General > Lobes > Middle > Laterality > Right
1155	right middle base	right middle	base		Middle zone of lung (C0559287)	Right lung lobe	Lungs	Respiratory System				Respiratory > General > Lobes > Middle > Laterality > Right
1156	right middle lobe	right middle lobe			Structure of middle lobe of lung	Right lung lobe	Lungs	Respiratory System				Respiratory > General > Lung > Lobes > Middle > Laterality > Right
1157	right middle lobe apex	right middle lobe	apex		Structure of middle lobe of lung	Right lung lobe	Lungs	Respiratory System				Respiratory > General > Lung > Lobes > Middle > Laterality > Right
1158	right middle lobe base	right middle lobe	base		Structure of middle lobe of lung	Right lung lobe	Lungs	Respiratory System				Respiratory > General > Lung > Lobes > Middle > Laterality > Right
1159	right middle lobe nodule	right middle lobe			Structure of middle lobe of lung	Right lung lobe	Lungs	Respiratory System				Respiratory > General > Lung > Lobes > Middle > Laterality > Right
1160	right middle lung	right middle lung			Middle zone of lung (C0559287)							Respiratory > General > Zones > Middle > Laterality > Right
1161	right midlung	right midlung			Fissure of lung							Respiratory > General > Regions > Other > Laterality > Right
1162	right minor fissure	right minor fissure			Minor fissure	Fissure of lung	Lung	Respiratory System				Respiratory > General > Specific > Fissures > Laterality > Right
1163	right ninth posterior rib	right rib	ninth posterior		Bone structure of rib	Right rib	Ribs	Musculoskeletal System				Respiratory > Musculoskeletal > Bones > Ribs > Laterality > Right
1164	right of midline	right of midline			-							Respiratory > Other > Specific_Descriptions
1165	right of the midline	right of the midline			-							Respiratory > Other > Specific_Descriptions
1166	right parahilar	right parahilar			Paramediastinal lung	Right lung	Lungs	Respiratory System	thorax, whole body		thorax, whole body	Respiratory > General > Specific > Parahilar > Laterality > Right
1167	right paramedian lungs	right paramedian lungs			Right paramediastinal lung							Respiratory > General > Regions > Other > Laterality > Right
1168	right paramediastinal	right paramediastinal			Right paramediastinal lung && Hilar							Respiratory > Mediastinum > Specific_Descriptions
1169	right paramediastinal and hilar regions	right paramediastinal, right hilar			Paramediastinal lung	Right lung	Lungs	Respiratory System	thorax, whole body		thorax, whole body	Respiratory > Mediastinum > Specific_Descriptions
1170	right paramediastinal lung	right paramediastinal lung			Paramediastinal lung	Right lung	Lungs	Respiratory System	thorax, whole body		thorax, whole body	Respiratory > Mediastinum > Specific_Descriptions
1171	right paramediastinal region	right paramediastinal region			Right paramediastinal lung							Respiratory > Mediastinum > Specific_Descriptions
1172	right paratracheal	right paratracheal			Right paramediastinal lung							Respiratory > Mediastinum > Regions > Paratracheal
1173	right paratracheal region	right paratracheal region			Paratracheal							Respiratory > Mediastinum > Regions > Paratracheal
1174	right paratracheal stripe	right paratracheal stripe			Paratracheal							Respiratory > Mediastinum > Regions > Paratracheal
1175	right pectoral	right pectoral			Paratracheal region (C0929179)							Respiratory > Other > Relative_Positions > Right
1176	right perihilar	right perihilar			Right pectoral part of chest							Respiratory > General > Specific > Perihilar > Laterality > Right
1177	right perihilar and infrahilar regions	right perihilar, infrahilar			Structure of perihilar region of lung							Respiratory > General > Regions > Perihilar > Laterality > Right
1178	right perihilar areas	right perihilar areas			Structure of perihilar region of lung && Hilar							Respiratory > General > Specific > Perihilar > Laterality > Right
1179	right perihilar region	right perihilar region			Structure of perihilar region of lung							Respiratory > General > Specific > Perihilar > Laterality > Right
1180	right peripheral mid lung	right mid lung	peripheral		Middle zone of lung (C0559287)	Right lung	Lungs	Respiratory System	thorax, whole body		thorax, whole body	Respiratory > General > Zones > Middle > Laterality > Right
1181	right pigtail catheter	right pigtail catheter			Middle zone of lung (C0559287)	Right lung	Lungs	Respiratory System	thorax, whole body		thorax, whole body	Respiratory > General > Chest > Walls > Specific_Descriptions
1182	right pleural	right pleural										Respiratory > General > Specific > Pleura > Laterality > Right
1183	right pleural cavity	right pleural cavity			Pleura	Pleural	Pleural	Respiratory System				Respiratory > General > Specific > Pleura > Laterality > Right
1184	right pleural space	right pleural space			Pleural cavity	Pleural	Pleural	Respiratory System				Respiratory > General > Specific > Pleura > Laterality > Right
1185	right pleural tube	right pleural tube			Right pleural cavity	Pleural	Pleural	Respiratory System				Respiratory > General > Chest > Walls > Specific_Descriptions
1186	right port	right port										Respiratory > General > Chest > Walls > Specific_Descriptions
1187	right posterior	right posterior										Respiratory > Other > Relative_Positions > Right
1188	right posterior chest wall	right posterior chest wall			Chest wall structure	Chest						Respiratory > Other > Relative_Positions > Right
1189	right posterior eighth rib	right rib	posterior eighth		Bone structure of rib	Right rib	Ribs	Musculoskeletal System				Respiratory > Musculoskeletal > Bones > Ribs > Laterality > Right
1190	right posterior lower ribs	right posterior lower ribs			Bone structure of rib	Right rib	Ribs	Musculoskeletal System				Respiratory > Musculoskeletal > Bones > Ribs > Laterality > Right
1191	right posterior rib	right rib	posterior		Bone structure of rib	Right rib	Ribs	Musculoskeletal System				Respiratory > Musculoskeletal > Bones > Ribs > Laterality > Right
1192	right posterior ribs	right ribs	posterior		Bone structure of rib	Right rib	Ribs	Musculoskeletal System				Respiratory > Musculoskeletal > Bones > Ribs > Laterality > Right
1193	right posterior seventh rib	right rib	posterior seventh		Bone structure of rib	Right rib	Ribs	Musculoskeletal System				Respiratory > Musculoskeletal > Bones > Ribs > Laterality > Right
1194	right posterior sixth rib	right rib	posterior sixth		Bone structure of rib	Right rib	Ribs	Musculoskeletal System				Respiratory > Musculoskeletal > Bones > Ribs > Laterality > Right
1195	right proximal humerus	right proximal humerus			Bone structure of rib	Right rib	Ribs	Musculoskeletal System				Respiratory > Musculoskeletal > Bones > Humerus > Laterality > Right
1196	right pulmonary artery	right pulmonary artery			Right pulmonary artery	right pulmonary artery				mediastinum, thorax, whole body	mediastinum, thorax, whole body	Respiratory > Cardiovascular > Great_Vessels > Pulmonary > Arteries
1197	right pulmonary hilum	right pulmonary hilum			Pulmonary artery structure							Respiratory > General > Specific > Hila > Laterality > Right
1198	right pulmonary system	right pulmonary system			Hilar	Right hilar	Lung region	Respiratory System				Respiratory > Other > Specific_Descriptions
1199	right residual lung	right residual lung			Lung	Lungs	Lungs	Respiratory System				Respiratory > General > Lung > Laterality > Right
1200	right retrocardiac	right retrocardiac			Right lung	Right lung	Lungs	Respiratory System	thorax, whole body		thorax, whole body	Respiratory > General > Regions > Retrocardiac > Laterality > Right
1201	right rib	right rib			Bone structure of rib	Right rib	Ribs	Musculoskeletal System				Respiratory > Musculoskeletal > Bones > Ribs > Laterality > Right
1202	right rib cage	right rib cage			Rib Cage	Right rib	Ribs	Musculoskeletal System				Respiratory > Musculoskeletal > Bones > Ribs > Laterality > Right
1203	right scapula	right scapula			Rib Cage	Right rib	Ribs	Musculoskeletal System		right shoulder, right upper extremity, whole body	right shoulder, right upper extremity, whole body	Respiratory > Musculoskeletal > Bones > Scapula > Laterality > Right
1204	right scapular	right scapular			Right scapula							Respiratory > Musculoskeletal > Bones > Scapula > Laterality > Right
1205	right second anterior rib	right rib	second anterior		Bone structure of rib	Right rib	Ribs	Musculoskeletal System				Respiratory > Musculoskeletal > Bones > Ribs > Laterality > Right
1206	right shoulder	right shoulder			Bone structure of rib	Right rib	Ribs	Musculoskeletal System		right upper extremity, whole body	right upper extremity, whole body	Respiratory > Musculoskeletal > Joints > Shoulder > Laterality > Right
1207	right shoulder area	right shoulder area			Shoulder	Right shoulder	Shoulder	Adjacent Structures	right upper extremity, whole body		right upper extremity, whole body	Respiratory > Musculoskeletal > Joints > Shoulder > Laterality > Right
1208	right shoulder joint	right shoulder joint			Shoulder	Right shoulder	Shoulder	Adjacent Structures	right upper extremity, whole body		right upper extremity, whole body	Respiratory > Musculoskeletal > Joints > Shoulder > Laterality > Right
1209	right side	right side			Right							Respiratory > Other > Relative_Positions > Right
1210	right side at the level of t4-t5	right side at the level of t4-t5			-							Respiratory > Musculoskeletal > Bones > Spine > Thoracic > Specific_Descriptions
1211	right side in the seventh and eighth ribs	right rib	seventh	eighth	Bone structure of rib	Right rib	Ribs	Musculoskeletal System				Respiratory > Musculoskeletal > Bones > Ribs > Laterality > Right
1212	right sided	right sided			Right							Respiratory > Other > Relative_Positions > Right
1213	right sixth and seventh posterior rib interspace	right rib interspace	sixth posterior	seventh posterior	Bone structure of rib	Right rib	Ribs	Musculoskeletal System				Respiratory > Musculoskeletal > Bones > Ribs > Laterality > Right
1214	right sixth rib	right rib	sixth		Bone structure of rib	Right rib	Ribs	Musculoskeletal System				Respiratory > Musculoskeletal > Bones > Ribs > Laterality > Right
1215	right subclavian	right subclavian			right subclavian	Right rib	Ribs	Musculoskeletal System				Respiratory > Cardiovascular > Great_Vessels > Subclavian > Laterality > Right
1216	right subclavian and brachiocephalic vein	right subclavian, brachiocephalic vein			right subclavian							Respiratory > Cardiovascular > Great_Vessels > Subclavian > Laterality > Right
1217	right subclavian and internal jugular vein confluence	right subclavian and internal jugular vein confluence			right subclavian && Structure of brachiocephalic vein							Respiratory > Cardiovascular > Great_Vessels > Subclavian > Vein > Laterality > Right
1218	right subclavian area	right subclavian			right subclavian							Respiratory > Cardiovascular > Great_Vessels > Subclavian > Laterality > Right
1219	right subclavian internal jugular system	right subclavian, internal jugular			right subclavian							Respiratory > Cardiovascular > Great_Vessels > Subclavian > Laterality > Right
1220	right subclavian vein	right subclavian vein										Respiratory > Cardiovascular > Great_Vessels > Subclavian > Vein > Laterality > Right
1221	right subpulmonic	right subpulmonic			Structure of right subclavian vein							Respiratory > General > Regions > Other > Laterality > Right
1222	right supraclavicular	right supraclavicular			-							Respiratory > Other_Anatomical_Structures > Supraclavicular > Laterality > Right
1223	right supraclavicular region in the	right supraclavicular region			region supraclavicular							Respiratory > Other_Anatomical_Structures > Supraclavicular > Laterality > Right
1224	right suprahilar	right suprahilar			region supraclavicular							Respiratory > General > Specific > Suprahilar > Laterality > Right
1225	right suprahilar region	right suprahilar region			-							Respiratory > General > Specific > Suprahilar > Laterality > Right
1226	right thoracic cavity	right thoracic cavity			-							Respiratory > General > Chest > Cavity > Laterality > Right
1227	right thoracotomy	right thoracotomy			Thoracic cavity structure							Respiratory > General > Chest > Walls > Specific_Descriptions
1228	right tracheobronchial angle	tracheobronchial angle	right									Respiratory > Other > Specific_Descriptions
1229	right tracheobronchial angulation	tracheobronchial angulation	right		Tracheobronchial angle	Tracheobronchial structure	Airways	Respiratory System				Respiratory > Other > Specific_Descriptions
1230	right transsubclavian	right transsubclavian			Tracheobronchial angle	Tracheobronchial structure	Airways	Respiratory System				Respiratory > General > Chest > Walls > Specific_Descriptions
1231	right upper	right upper			Upper zone of lung	Lungs	Lungs	Respiratory System				Respiratory > General > Zones > Upper > Laterality > Right
1232	right upper abdomen	right upper abdomen			Structure of upper lobe of lung							Respiratory > Abdominal > Regions > Specific_Descriptions
1233	right upper abdominal quadrant	right upper abdominal quadrant			Structure of right upper quadrant of abdomen	Substructure	Abdomen	Abdominal Structures				Respiratory > Abdominal > Regions > Quadrants > Upper_Right
1234	right upper and left lower lobes	right upper lobe, left lower lobe			Structure of right upper quadrant of abdomen	Substructure	Abdomen	Abdominal Structures				Respiratory > General > Lobes > Upper > Laterality > Right
1235	right upper and lower lobe	right upper lobe, right lower lobe			Structure of upper lobe of lung && Structure of lower lobe of lung	Right lung lobe	Lungs	Respiratory System				Respiratory > General > Lobes > Upper > Laterality > Right
1236	right upper and lower lobes	right upper lobe, right lower lobe			Structure of upper lobe of lung && Structure of lower lobe of lung	Right lung lobe	Lungs	Respiratory System				Respiratory > General > Lobes > Upper > Laterality > Right
1237	right upper and lower lobes bilaterally	right upper lobe, lower lobes bilaterally			Structure of upper lobe of lung && Structure of lower lobe of lung	Right lung lobe	Lungs	Respiratory System				Respiratory > General > Lobes > Upper > Specific_Descriptions
1238	right upper and mid lungs	right upper lung, right mid lung			Middle zone of lung (C0559287) && Upper zone of lung (C0559286)	Right lung	Lungs	Respiratory System	thorax, whole body		thorax, whole body	Respiratory > General > Zones > Combined > Laterality > Right
1239	right upper and middle lobe	right upper lobe, right middle lobe			Upper zone of lung (C0559286) && Middle zone of lung (C0559287)	Right lung	Lungs	Respiratory System	thorax, whole body		thorax, whole body	Respiratory > General > Lobes > Upper > Specific_Descriptions
1240	right upper anterior	right upper	anterior		Upper zone of lung	Lungs	Lungs	Respiratory System				Respiratory > General > Zones > Upper > Laterality > Right
1241	right upper arm	right upper arm			Structure of upper lobe of lung							Respiratory > Other_Anatomical_Structures > Specific_Descriptions
1242	right upper chest	right upper chest			Right upper arm structure							Respiratory > General > Chest > Laterality > Right > Position > Upper
1243	right upper chest wall	right upper chest wall			Chest wall structure	Chest						Respiratory > General > Chest > Walls > Laterality > Right
1244	right upper extremity	right upper extremity			Chest wall structure	right upper extremity				whole body	whole body	Respiratory > Other_Anatomical_Structures > Extremities > Upper > Laterality > Right
1245	right upper hemithorax	right hemithorax	upper		Hemithoracic structure	Right hemithorax	Hemithorax	Thoracic Structures				Respiratory > General > Chest > Hemithorax > Laterality > Right
1246	right upper hemithorax laterally	right hemithorax	upper laterally		Hemithoracic structure	Right hemithorax	Hemithorax	Thoracic Structures				Respiratory > General > Chest > Hemithorax > Laterality > Right
1247	right upper lateral chest wall	right lateral chest wall	upper		Right lateral chest wall (C0818149)	Chest						Respiratory > General > Chest > Walls > Laterality > Right
1248	right upper lobe	right upper lobe			Structure of upper lobe of lung	Right lung lobe	Lungs					Respiratory > General > Lung > Lobes > Upper > Laterality > Right
1249	right upper lobe bases	right upper lobe	bases		Structure of upper lobe of lung	Right lung lobe	Lungs	Respiratory System				Respiratory > General > Lung > Lobes > Upper > Laterality > Right
1250	right upper lobe medial	right upper lobe	medial		Structure of upper lobe of lung	Right lung lobe	Lungs	Respiratory System				Respiratory > General > Lung > Lobes > Upper > Laterality > Right
1251	right upper lobe perihilar	right upper lobe	perihilar		Structure of upper lobe of lung	Right lung lobe	Lungs	Respiratory System				Respiratory > General > Lung > Lobes > Upper > Laterality > Right
1252	right upper lobe posterior segment	right upper lobe	posterior segment		Structure of upper lobe of lung	Right lung lobe	Lungs	Respiratory System				Respiratory > General > Lung > Lobes > Upper > Laterality > Right
1253	right upper lobe/suprahilar	right upper lobe, suprahilar			Structure of upper lobe of lung	Right lung lobe	Lungs	Respiratory System				Respiratory > General > Lobes > Upper > Laterality > Right
1254	right upper lung	right upper lung			Upper zone of lung (C0559286)	Right lung	Lungs	Respiratory System	thorax, whole body		thorax, whole body	Respiratory > General > Lobes > Upper > Laterality > Right
1255	right upper lung field	right upper lung field			Upper zone of lung (C0559286)	Right lung	Lungs	Respiratory System	thorax, whole body		thorax, whole body	Respiratory > General > Lobes > Upper > Laterality > Right
1256	right upper lung region	right upper lung region			Upper zone of lung (C0559286)	Right lung	Lungs	Respiratory System	thorax, whole body		thorax, whole body	Respiratory > General > Lobes > Upper > Laterality > Right
1257	right upper lung zone	right upper lung zone			Upper zone of lung (C0559286)	Right lung	Lungs	Respiratory System	thorax, whole body		thorax, whole body	Respiratory > General > Lobes > Upper > Laterality > Right
1258	right upper mediastinal contour	right upper mediastinal contour			Upper zone of lung (C0559286)	Right lung	Lungs	Respiratory System	thorax, whole body		thorax, whole body	Respiratory > Mediastinum > Laterality > Right
1259	right upper mediastinum	right upper mediastinum			Mediastinum							Respiratory > Mediastinum > Laterality > Right
1260	right upper quadrant	right upper quadrant			Mediastinum							Respiratory > Abdominal > Regions > Quadrants > Upper_Right
1261	right upper quadrant of the abdomen	right upper quadrant of the abdomen			Structure of right upper quadrant of abdomen							Respiratory > Abdominal > Regions > Quadrants > Upper_Right
1262	right upper rib cage	right upper rib cage			Rib Cage	Right rib	Ribs	Musculoskeletal System				Respiratory > Musculoskeletal > Bones > Ribs > Specific_Descriptions
1263	right upper svc	right svc	upper		Rib Cage	Right rib	Ribs	Musculoskeletal System				Respiratory > Cardiovascular > Great_Vessels > Vena_Cava > Superior > Laterality > Right
1264	right upper zone	right upper zone			Right superior vena cava structure							Respiratory > General > Zones > Upper > Laterality > Right
1265	right ventricle	right ventricle			Right ventricular structure	right ventricle				heart, mediastinum, thorax, whole body	heart, mediastinum, thorax, whole body	Respiratory > Cardiovascular > Heart > Chambers > Ventricle > Laterality > Right
1266	right ventricle outflow tract	right ventricle outflow tract			Right ventricular structure							Respiratory > Cardiovascular > Heart > Chambers > Ventricle > Laterality > Right
1267	right ventricles	right ventricles			Right ventricular structure							Respiratory > Cardiovascular > Heart > Chambers > Ventricle > Laterality > Right
1268	right ventricular	right ventricular			Right ventricular structure							Respiratory > Cardiovascular > Heart > Chambers > Ventricle > Laterality > Right
1269	right ventricular apex	right ventricular	apex		Right ventricular structure							Respiratory > Cardiovascular > Heart > Chambers > Ventricle > Laterality > Right
1270	right ventricular apical portion	right ventricular apical portion			Right ventricular structure							Respiratory > Cardiovascular > Heart > Chambers > Ventricle > Laterality > Right
1271	right ventricular outflow tract	right ventricular outflow tract			Right ventricular structure							Respiratory > Cardiovascular > Heart > Chambers > Ventricle > Laterality > Right
1272	right-mid lung	right-mid lung			Structure of outflow tract of right ventricle (C0225892)							Respiratory > General > Zones > Middle > Laterality > Right
1273	right-sided	right-sided			Middle zone of lung (C0559287)	Right lung	Lungs	Respiratory System	thorax, whole body		thorax, whole body	Respiratory > Other > Relative_Positions > Right
1274	right-sided basilar	right-sided basilar			-							Respiratory > General > Regions > Other > Laterality > Right
1275	right-sided diaphragmatic contour and pleural sinus	right diaphragmatic contour, right pleural sinus			Basal segment of lung (C0225704)							Respiratory > Diaphragm > Laterality > Right
1276	right-sided internal jugular	right internal jugular			Right internal jugular vein							Respiratory > Cardiovascular > Great_Vessels > Jugular > Internal > Laterality > Right
1277	right-sided lung	right-sided lung			Right internal jugular vein							Respiratory > General > Lung > Laterality > Right
1278	right-sided mediastinal structures	right-sided mediastinal structures			Right lung	Right lung	Lungs	Respiratory System	thorax, whole body		thorax, whole body	Respiratory > Mediastinum > Laterality > Right
1279	right-sided mid and lower lung	right-sided mid lung, right-sided lower lung			Mediastinum							Respiratory > General > Zones > Combined > Specific_Descriptions
1280	right-sided pleural sinus	right-sided pleural sinus			Middle zone of lung (C0559287) && Lower zone of lung (C0559288)	Right lung	Lungs	Respiratory System	thorax, whole body		thorax, whole body	Respiratory > General > Specific > Pleura > Laterality > Right
1281	right-sided subclavian	right subclavian			right subclavian	Pleural	Pleural	Respiratory System				Respiratory > Cardiovascular > Great_Vessels > Subclavian > Laterality > Right
1282	rightward	rightward			right subclavian							Respiratory > Other > Relative_Positions > Right
1283	rightward upper	rightward upper			-							Respiratory > Other > Relative_Positions > Right
1284	scalp	scalp			Structure of upper lobe of lung							Respiratory > Other_Anatomical_Structures > Head > Scalp
1285	second and third left ribs	left ribs	second	third	Bone structure of rib	Left Ribs	Ribs	Musculoskeletal System				Respiratory > Musculoskeletal > Bones > Ribs > Laterality > Left
1286	second and third rib	rib	second	third	Bone structure of rib	Ribs	Ribs	Musculoskeletal System				Respiratory > Musculoskeletal > Bones > Ribs > General
1287	second most superior	superior	second most		superior							Respiratory > Other > Anatomical_Directions > Superior
1288	second portion of the duodenum	duodenum	second		Duodenum	duodenum				retroperitoneum, abdomen, whole body	retroperitoneum, abdomen, whole body	Respiratory > Abdominal > Organs > Intestines > Small > Duodenum
1289	second rib on the left	left rib	second		Bone structure of rib	Left Ribs	Ribs	Musculoskeletal System				Respiratory > Musculoskeletal > Bones > Ribs > Laterality > Left
1290	second sternotomy wire	second sternotomy wire			Bone structure of rib	Left rib	Ribs	Musculoskeletal System				Respiratory > Musculoskeletal > Bones > Sternum > Specific_Descriptions
1291	semi-upright	semi-upright										Respiratory > Other > Imaging_Descriptions
1292	several right lower thoracic ribs	several right thoracic ribs	lower		Bone structure of rib	Right rib	Ribs	Musculoskeletal System				Respiratory > Musculoskeletal > Bones > Ribs > Laterality > Right
1293	several right-sided lower thoracic ribs	several right-sided thoracic ribs	lower		Bone structure of rib	Right rib	Ribs	Musculoskeletal System				Respiratory > Musculoskeletal > Bones > Ribs > Laterality > Right
1294	shoulder	shoulder			Shoulder	Shoulder	Shoulder	Musculoskeletal System	upper extremity, whole body	upper extremity, whole body	upper extremity, whole body	Respiratory > Musculoskeletal > Joints > Shoulder > General
1295	shoulder area	shoulder			Shoulder	Shoulder	Shoulder	Musculoskeletal System	upper extremity, whole body	upper extremity, whole body	upper extremity, whole body	Respiratory > Musculoskeletal > Joints > Shoulder > General
1296	shoulder blades	shoulder blades			Shoulder	Shoulder	Shoulder	Adjacent Structures	upper extremity, whole body		upper extremity, whole body	Respiratory > Other_Anatomical_Structures > Specific_Descriptions
1297	shoulders	shoulders			Shoulder	Shoulder	Shoulder	Adjacent Structures	upper extremity, whole body		upper extremity, whole body	Respiratory > Musculoskeletal > Joints > Shoulder > General
1298	shoulders bilaterally	shoulders bilaterally			Shoulder	Bilateral shoulder	Shoulder	Adjacent Structures				Respiratory > Musculoskeletal > Joints > Shoulder > Laterality > Bilateral
1299	sixth through tenth ribs	ribs	sixth through tenth		Bone structure of rib	Rib	Ribs	Musculoskeletal System				Respiratory > Musculoskeletal > Bones > Ribs > General
1300	slightly proximal to the right subclavian vein	right subclavian vein	proximal		Subclavian vessels							Respiratory > Cardiovascular > Great_Vessels > Subclavian > Vein > Laterality > Right
1301	soft tissue of the	soft tissues			soft tissue							Respiratory > Musculoskeletal > Soft_Tissues > General
1302	soft tissues	soft tissues			soft tissue							Respiratory > Musculoskeletal > Soft_Tissues > General
1303	soft tissues of the right lateral chest wall	soft tissues	right lateral chest wall		soft tissue							Respiratory > Musculoskeletal > Soft_Tissues > General
1304	soft tissues on the left	left soft tissues			soft tissue							Respiratory > Musculoskeletal > Soft_Tissues > Laterality > Left
1305	spine	spine			Entire spine	spine	spine	Skeletal System	whole body	whole body	whole body	Respiratory > Musculoskeletal > Bones > Spine > General
1306	spleen	spleen			Spleen	spleen				peritoneal cavity, abdomen, whole body	peritoneal cavity, abdomen, whole body	Respiratory > Abdominal > Organs > Spleen
1307	splenic	splenic			Structure of splenic artery							Respiratory > Abdominal > Organs > Spleen
1308	splenic artery	splenic artery			Structure of splenic artery	splenic artery				abdomen, whole body	abdomen, whole body	Respiratory > Other > Specific_Descriptions
1309	splenic flexure	splenic flexure			Structure of splenic artery							Respiratory > Abdominal > Organs > Intestines > Large > Colon > Splenic_Flexure
1310	sternal	sternal			Sternum	Sternum	Sternum	Musculoskeletal System	anterior chest wall, chest wall, thorax, whole body		anterior chest wall, chest wall, thorax, whole body	Respiratory > Musculoskeletal > Bones > Sternum > General
1311	sternal notch	sternal notch			Sternum	Sternum	Sternum	Musculoskeletal System	anterior chest wall, chest wall, thorax, whole body		anterior chest wall, chest wall, thorax, whole body	Respiratory > Musculoskeletal > Bones > Sternum > Regions > Notch
1312	sternum	sternum			Sternum	Sternum	Sternum	Musculoskeletal System	anterior chest wall, chest wall, thorax, whole body	anterior chest wall, chest wall, thorax, whole body	anterior chest wall, chest wall, thorax, whole body	Respiratory > Musculoskeletal > Bones > Sternum > General
1313	stomach	stomach			Stomach structure	Stomach	Stomach	Abdominal Structures	peritoneal cavity, abdomen, whole body	peritoneal cavity, abdomen, whole body	peritoneal cavity, abdomen, whole body	Respiratory > Abdominal > Organs > Stomach > General
1314	stomach bodies	stomach bodies			Body of stomach (C0227230)	Stomach	Stomach	Abdominal Structures	peritoneal cavity, abdomen, whole body		peritoneal cavity, abdomen, whole body	Respiratory > Abdominal > Organs > Stomach > General
1315	stomach proximally	stomach	proximally		Stomach structure	Stomach	Stomach	Abdominal Structures	peritoneal cavity, abdomen, whole body	peritoneal cavity, abdomen, whole body	peritoneal cavity, abdomen, whole body	Respiratory > Abdominal > Organs > Stomach > General
1316	subclavian	subclavian			Clavicular region (C0230077)							Respiratory > Cardiovascular > Great_Vessels > Subclavian > General
1317	subdiaphragmatic	subdiaphragmatic			Subdiaphragmatic region							Respiratory > Abdominal > General
1318	subpulmonic	subpulmonic			-							Respiratory > Other > Specific_Descriptions
1319	subpulmonic right	right subpulmonic			Structure of right subclavian vein							Respiratory > General > Regions > Other > Laterality > Right
1320	substernal	substernal			Sternum							Respiratory > Other > Specific_Descriptions
1321	superior	superior			superior							Respiratory > Other > Anatomical_Directions > Superior
1322	superior aspect	superior			superior							Respiratory > Other > Anatomical_Directions > Superior
1323	superior aspect of the right lower lung	right lower lung	superior		Right lower lung zone (C0929214)	Right lung	Lungs	Respiratory System	thorax, whole body		thorax, whole body	Respiratory > General > Zones > Lower > Laterality > Right
1324	superior cavoatrial junction	cavoatrial junction	superior		cavoatrial junction							Respiratory > Cardiovascular > Great_Vessels > Vena_Cava > Superior > Junctions
1325	superior mediastinum	mediastinum	superior		Mediastinum	mediastinum				thorax, whole body	thorax, whole body	Respiratory > Mediastinum > General
1326	superior mid svc	svc	superior mid		Superior vena cava structure							Respiratory > Cardiovascular > Great_Vessels > Vena_Cava > Superior > General
1327	superior portion of the apices	apices	superior		Apical zone of lung	Lung	Lungs	Respiratory System	thorax, whole body		thorax, whole body	Respiratory > General > Specific > Apices > General
1328	superior portions	superior			superior							Respiratory > Other > Anatomical_Directions > Superior
1329	superior portions of the bilateral lower lobes	bilateral lower lobes	superior		Structure of lower lobe of lung	Bilateral lobe		Respiratory System				Respiratory > General > Lobes > Lower > Laterality > Bilateral
1330	superior posterior	superior	posterior		superior							Respiratory > Other > Anatomical_Directions > Superior
1331	superior right atrium	right atrium	superior		Right atrial structure	right atrium				heart, mediastinum, thorax, whole body	heart, mediastinum, thorax, whole body	Respiratory > Cardiovascular > Heart > Chambers > Atrium > Laterality > Right
1332	superior right lower lobe	right lower lobe	superior		Structure of lower lobe of lung	Right lung lobe		Respiratory System				Respiratory > General > Lung > Lobes > Lower > Laterality > Right
1333	superior right lower lobes	right lower lobes	superior		Structure of lower lobe of lung	Right lung lobe		Respiratory System				Respiratory > General > Lobes > Lower > Laterality > Right
1334	superior segment left lower lobe	left lower lobe	superior		Structure of lower lobe of lung (C1261077)	Left lung lobe	Lungs	Respiratory System				Respiratory > General > Lung > Lobes > Lower > Laterality > Left
1335	superior segment of the left lower lobe	left lower lobe	superior		Structure of lower lobe of lung (C1261077)	Left lung lobe	Lungs	Respiratory System				Respiratory > General > Lung > Lobes > Lower > Laterality > Left
1336	superior svc	svc	superior		Superior vena cava structure							Respiratory > Cardiovascular > Great_Vessels > Vena_Cava > Superior > General
1337	superior to the hila bilaterally	superior to the hila bilaterally			suprahilar	Hilar	Lung region	Respiratory System				Respiratory > Other > Anatomical_Directions > Superior
1338	superior trachea	trachea	superior		Trachea	Trachea	Airways	Respiratory System	mediastinum, thorax, whole body	mediastinum, thorax, whole body	mediastinum, thorax, whole body	Respiratory > General > Specific > Trachea > General
1339	superior vena cava	superior vena cava			Superior vena cava structure	superior vena cava				mediastinum, thorax, whole body	mediastinum, thorax, whole body	Respiratory > Cardiovascular > Great_Vessels > Vena_Cava > Superior > General
1340	superiorly	superiorly			superior							Respiratory > Other > Anatomical_Directions > Superior
1341	superolateral to left major fissure	left major fissure	superolateral		Major fissure (C0929208)	Fissure of lung	Lung	Respiratory System				Respiratory > General > Specific > Fissures > Major > Laterality > Left
1342	supraclavicular level on the left	left supraclavicular			region supraclavicular							Respiratory > Other_Anatomical_Structures > Supraclavicular > Laterality > Left
1343	suprahilar on the right	right suprahilar			region supraclavicular							Respiratory > General > Specific > Suprahilar > Laterality > Right
1344	surrounding the skeletal structures of the thorax	skeletal structures of the thorax	surrounding		Bone structure of thorax							Respiratory > Musculoskeletal > Bones > Spine > Specific_Descriptions
1345	svc	svc			Superior vena cava structure							Respiratory > Cardiovascular > Great_Vessels > Vena_Cava > Superior > General
1346	svc mid portion	svc	mid		Superior vena cava structure							Respiratory > Cardiovascular > Great_Vessels > Vena_Cava > Superior > General
1347	svc-right atrium junction	svc-right atrium junction			Superior vena cava structure && Right atrial structure && Anatomical junction							Respiratory > Cardiovascular > Great_Vessels > Vena_Cava > Superior > Junctions
1348	svc/right atrium junction	svc/right atrium junction			Superior vena cava structure && Right atrial structure && Anatomical junction							Respiratory > Cardiovascular > Great_Vessels > Vena_Cava > Superior > Junctions
1349	t1	t1			Body of vertebra							Respiratory > Musculoskeletal > Bones > Spine > Vertebrae > Specific > T1
1350	t10 and t11	t10 and t11			Body of vertebra							Respiratory > Musculoskeletal > Bones > Spine > Vertebrae > Specific > Combination
1351	t10 vertebral bodies	t10 vertebral bodies			Body of vertebra							Respiratory > Musculoskeletal > Bones > Spine > Vertebrae > Specific > T10
1352	t11	t11			Body of vertebra							Respiratory > Musculoskeletal > Bones > Spine > Vertebrae > Specific > T11
1353	t12	t12			Body of vertebra							Respiratory > Musculoskeletal > Bones > Spine > Vertebrae > Specific > T12
1354	t12 vertebrae	t12 vertebrae			Body of vertebra							Respiratory > Musculoskeletal > Bones > Spine > Vertebrae > Specific > T12
1355	t6	t6			Body of vertebra							Respiratory > Musculoskeletal > Bones > Spine > Vertebrae > Specific > T6
1356	t6 vertebral bodies	t6 vertebral bodies			Body of vertebra							Respiratory > Musculoskeletal > Bones > Spine > Vertebrae > Specific > T6
1357	t7	t7			Body of vertebra							Respiratory > Musculoskeletal > Bones > Spine > Vertebrae > Specific > T7
1358	t8 vertebral bodies	t8 vertebral bodies			Body of vertebra							Respiratory > Musculoskeletal > Bones > Spine > Vertebrae > Specific > T8
1359	t9 vertebral bodies	t9 vertebral bodies			Body of vertebra							Respiratory > Musculoskeletal > Bones > Spine > Vertebrae > Specific > T9
1360	tenth left posterior rib level	left posterior rib	tenth		Bone structure of rib	Left rib	Ribs	Musculoskeletal System				Respiratory > Musculoskeletal > Bones > Ribs > Laterality > Left
1361	the gastroesophageal junction	gastroesophageal junction			gastroesophageal	gastroesophageal junction				retroperitoneum, abdomen, whole body	retroperitoneum, abdomen, whole body	Respiratory > Abdominal > Junctions > Gastroesophageal
1362	the level of the gastroesophageal junction	gastroesophageal junction			gastroesophageal	gastroesophageal junction				retroperitoneum, abdomen, whole body	retroperitoneum, abdomen, whole body	Respiratory > Abdominal > Junctions > Gastroesophageal
1363	the lung parenchyma	lung parenchyma			Structure of parenchyma of lung (C0819757)	Lung	Lungs	Respiratory System	thorax, whole body		thorax, whole body	Respiratory > General > Lung > Parenchyma
1364	the lungs	lungs			Lung	Lung	Lungs	Respiratory System	thorax, whole body		thorax, whole body	Respiratory > General > Lung > General
1365	the lungs bilaterally	lungs bilaterally			Lung	Bilateral lungs	Lungs	Respiratory System				Respiratory > General > Lung > Laterality > Bilateral
1366	the right ventricle	right ventricle			Right ventricular structure	right ventricle				heart, mediastinum, thorax, whole body	heart, mediastinum, thorax, whole body	Respiratory > Cardiovascular > Heart > Chambers > Ventricle > Laterality > Right
1367	third anterior interspace	anterior interspace	third		-							Respiratory > Other > Anatomical_Directions > Anterior
1368	third left anterior rib	left anterior rib	third		Bone structure of rib	Left rib	Ribs	Musculoskeletal System				Respiratory > Musculoskeletal > Bones > Ribs > Laterality > Left
1369	third right intercostal space	right intercostal space	third		Structure of intercostal space							Respiratory > Musculoskeletal > Bones > Ribs > Laterality > Right
1370	thoracic	thoracic			Bone structure of thorax							Respiratory > General > Chest > General
1371	thoracic aorta	thoracic aorta			Thoracic aorta	thoracic aorta				mediastinum, thorax, whole body	mediastinum, thorax, whole body	Respiratory > Cardiovascular > Great_Vessels > Aorta > Regions > Thoracic
1372	thoracic cavity	thoracic cavity			Thoracic cavity structure							Respiratory > General > Chest > Cavity > General
1373	thoracic inlet	thoracic inlet			Structure of thoracic inlet							Respiratory > General > Chest > Inlet > General
1374	thoracic inlet bilaterally	thoracic inlet bilaterally			Structure of thoracic inlet							Respiratory > General > Chest > Inlet > Laterality > Bilateral
1375	thoracic spine	thoracic spine			Thoracic spine structure	Thoracic spine	spine	Skeletal System				Respiratory > Musculoskeletal > Bones > Spine > Thoracic > General
1376	thoracic vertebral bodies	thoracic vertebral bodies			Structure of body of thoracic vertebra							Respiratory > Musculoskeletal > Bones > Spine > Specific_Descriptions
1377	thoracoabdominal region	thoracoabdominal			Abdomen							Respiratory > Other_Anatomical_Structures > Thoracoabdominal
1378	thoracoabdominal wall and	thoracoabdominal wall										Respiratory > Other_Anatomical_Structures > Thoracoabdominal
1379	thoracolumbar junction	thoracolumbar junction			Thoracolumbar vertebral column							Respiratory > Musculoskeletal > Bones > Spine > Thoracolumbar
1380	thoracolumbar spine	thoracolumbar spine			Thoracolumbar vertebral column	Thoracolumbar spine	spine	Skeletal System				Respiratory > Musculoskeletal > Bones > Spine > Thoracolumbar
1381	thorax	thorax			Bone structure of thorax	thorax				whole body	whole body	Respiratory > General > Chest > General
1382	throat	throat			Throat							Respiratory > Other_Anatomical_Structures > Neck > General
1383	tip over distal svc	svc	distal		Superior vena cava structure							Respiratory > Cardiovascular > Great_Vessels > Vena_Cava > Superior > General
1384	to the left	left			-							Respiratory > Other > Relative_Positions > Left
1385	to the right	right			Right							Respiratory > Other > Relative_Positions > Right
1386	to the right side	right side			Right							Respiratory > Other > Relative_Positions > Right
1387	torso	torso										Respiratory > Other_Anatomical_Structures > Specific_Descriptions
1388	towards the right	right	towards		Right							Respiratory > Other > Relative_Positions > Right
1389	trach	trach			Trachea	Trachea	Airways	Respiratory System	mediastinum, thorax, whole body		mediastinum, thorax, whole body	Respiratory > General > Specific > Trachea > General
1390	trachea	trachea			Trachea	Trachea	Airways	Respiratory System	mediastinum, thorax, whole body	mediastinum, thorax, whole body	mediastinum, thorax, whole body	Respiratory > General > Specific > Trachea > General
1391	track of the right pleural tube	track of the right pleural tube										Respiratory > General > Chest > Walls > Specific_Descriptions
1392	transverse colon	transverse colon			Colon structure (body structure)	transverse colon				peritoneal cavity, abdomen, whole body	peritoneal cavity, abdomen, whole body	Respiratory > Abdominal > Organs > Intestines > Large > Colon > Transverse
1393	two lower thoracic vertebral bodies	thoracic vertebral bodies	lower		Structure of body of thoracic vertebra							Respiratory > Musculoskeletal > Bones > Spine > Specific_Descriptions
1394	under the diaphragm	diaphragm	under		Entire diaphragm	Diaphragm	Diaphragm	Abdominal Structures	thorax, whole body	thorax, whole body	thorax, whole body	Respiratory > Diaphragm > General
1395	under the diaphragms	diaphragms	under		Entire diaphragm	Diaphragm	Diaphragm	Abdominal Structures	thorax, whole body		thorax, whole body	Respiratory > Diaphragm > General
1396	under the hemidiaphragms	hemidiaphragms	under		Structure of hemidiaphragm	Hemidiaphragm	Diaphragm	Abdominal Structures	thorax, whole body		thorax, whole body	Respiratory > Diaphragm > General
1397	under the right hemidiaphragm	right hemidiaphragm	under		Right hemidiaphragm	Right hemidiaphragm	Diaphragm	Abdominal Structures	thorax, whole body	thorax, whole body	thorax, whole body	Respiratory > Diaphragm > Laterality > Right
1398	underlying lung	lung			Lung	Lung	Lungs	Respiratory System	thorax, whole body	thorax, whole body	thorax, whole body	Respiratory > General > Lung > General
1399	upper	upper			-							Respiratory > Other > Relative_Positions > Upper
1400	upper abdomen	upper abdomen			Upper abdomen structure (C2937240)	Abdomen	Abdomen	Abdominal Structures	whole body		whole body	Respiratory > Abdominal > General
1401	upper abdomen in the midline	upper abdomen	midline		Upper abdomen structure (C2937240)	Abdomen	Abdomen	Abdominal Structures	whole body		whole body	Respiratory > Abdominal > General
1402	upper abdomen near the gastroesophageal junction	upper abdomen	near gastroesophageal junction		Upper abdomen structure (C2937240)	Abdomen	Abdomen	Abdominal Structures	whole body		whole body	Respiratory > Abdominal > General
1403	upper abdominal	upper abdominal			Upper abdomen structure (C2937240)	Abdomen	Abdomen	Abdominal Structures	whole body		whole body	Respiratory > Abdominal > General
1404	upper airway	airway	upper		Airway structure							Respiratory > General > Airway > General
1405	upper and lower hilus	upper hilus, lower hilus			Hilum C0929176	Hilar	Lung region	Respiratory System				Respiratory > General > Specific > Hila > Position > Upper
1406	upper aspect of the abdomen	upper aspect of the abdomen			Upper abdomen structure (C2937240)	Abdomen	Abdomen	Abdominal Structures	whole body		whole body	Respiratory > Abdominal > Regions > Specific_Descriptions
1407	upper cardiac silhouette to the right of the spine	upper cardiac silhouette	to the right of the spine		Cardiac border && Entire spine							Respiratory > Cardiovascular > Heart > Specific_Descriptions
1408	upper chest	chest	upper		Chest							Respiratory > General > Chest > General
1409	upper chest border on the left	left upper chest border			Chest && Anatomic Border (C1522411)							Respiratory > Other > Specific_Descriptions
1410	upper esophagus	esophagus	upper		Esophagus	esophagus				mediastinum, thorax, whole body	mediastinum, thorax, whole body	Respiratory > Abdominal > Organs > Esophagus > General
1411	upper hemithorax	hemithorax	upper		Hemithoracic structure	Hemithoracic structure	Hemithorax	Thoracic Structures				Respiratory > General > Chest > Hemithorax > General
1412	upper hemithorax bilaterally	hemithorax bilaterally	upper		Hemithoracic structure	Hemithoracic structure	Hemithorax	Thoracic Structures				Respiratory > General > Chest > Hemithorax > Laterality > Bilateral
1413	upper left abdominal quadrant	upper left abdominal quadrant			Structure of left upper quadrant of abdomen (C0230179)	Substructure	Abdomen	Abdominal Structures				Respiratory > Abdominal > Regions > Quadrants > Upper_Left
1414	upper left lung medially	upper left lung	medially		Upper zone of lung (C0559286)	Left lung	Lungs	Respiratory System	thorax, whole body		thorax, whole body	Respiratory > General > Zones > Upper > Laterality > Left
1415	upper lobe	upper lobe			Structure of upper lobe of lung	Lung lobe	Lungs	Respiratory System				Respiratory > General > Lung > Lobes > Upper > General
1416	upper lobe and lower lobe bilaterally	upper lobe bilaterally, lower lobe bilaterally			Structure of upper lobe of lung && lower lobe	Bilateral lobe	Lungs	Respiratory System				Respiratory > General > Lobes > Upper > Laterality > Bilateral
1417	upper lobes	upper lobes			Structure of upper lobe of lung	Lung lobe	Lungs	Respiratory System				Respiratory > General > Lung > Lobes > Upper > General
1418	upper lobes bilaterally	upper lobes bilaterally			Structure of upper lobe of lung	Bilateral lobe	Lungs	Respiratory System				Respiratory > General > Lung > Lobes > Upper > Laterality > Bilateral
1419	upper lumbar	lumbar	upper		Lumbar Region							Respiratory > Musculoskeletal > Bones > Spine > Lumbar > General
1420	upper lumbar spine	lumbar spine	upper		Lumbar spine structure	Lumbar spine	spine	Skeletal System				Respiratory > Musculoskeletal > Bones > Spine > Lumbar > General
1421	upper lumbar vertebral bodies	lumbar vertebral bodies	upper		Structure of body of lumbar vertebra							Respiratory > Musculoskeletal > Bones > Spine > Specific_Descriptions
1422	upper lung	upper lung			Upper zone of lung (C0559286)	Lung	Lungs	Respiratory System	thorax, whole body		thorax, whole body	Respiratory > General > Lung > Zones > Upper > General
1423	upper lung fields bilaterally	upper lung fields bilaterally			Upper zone of lung (C0559286)	Bilateral lungs	Lungs	Respiratory System				Respiratory > General > Lung > Zones > Upper > Laterality > Bilateral
1424	upper lungs	upper lungs			Upper zone of lung (C0559286)	Lung	Lungs	Respiratory System	thorax, whole body		thorax, whole body	Respiratory > General > Lung > Zones > Upper > General
1425	upper lungs bilaterally	upper lungs bilaterally			Upper zone of lung (C0559286)	Bilateral lungs	Lungs	Respiratory System				Respiratory > General > Lung > Zones > Upper > Laterality > Bilateral
1426	upper margin of the clavicles	clavicles	upper margin		Bone structure of clavicle	Clavicles	Clavicles	Musculoskeletal System				Respiratory > Musculoskeletal > Bones > Clavicle > General
1427	upper margin of the left bronchus and the apex of the aortic knob	left bronchus, aorta knob	upper margin	apex	Structure of left bronchus (C4521596) && aortic knob							Respiratory > Other > Specific_Descriptions
1428	upper margin of the right lung	right lung	upper margin		Lung	Right lung	Lungs	Respiratory System	thorax, whole body	thorax, whole body	thorax, whole body	Respiratory > General > Lung > Laterality > Right
1429	upper medial left aspects of the mediastinum	left upper mediastinum	medial		Mediastinum							Respiratory > Mediastinum > Laterality > Left
1430	upper mediastinal	upper mediastinal			Mediastinum							Respiratory > Mediastinum > General
1431	upper mediastinal silhouette	mediastinal silhouette	upper		Mediastinum							Respiratory > Mediastinum > Specific_Descriptions
1432	upper mediastinum	mediastinum	upper		Mediastinum	mediastinum				thorax, whole body	thorax, whole body	Respiratory > Mediastinum > General
1433	upper mid thoracic vertebral bodies	thoracic vertebral bodies	upper	mid	Structure of body of thoracic vertebra							Respiratory > Musculoskeletal > Bones > Spine > Specific_Descriptions
1434	upper portion of a non-distended stomach	stomach	upper		Stomach structure	Stomach	Stomach	Abdominal Structures	peritoneal cavity, abdomen, whole body	peritoneal cavity, abdomen, whole body	peritoneal cavity, abdomen, whole body	Respiratory > Abdominal > Organs > Stomach > General
1435	upper portion of the abdomen	upper portion of the abdomen			Upper abdomen structure (C2937240)	Abdomen	Abdomen	Abdominal Structures	whole body		whole body	Respiratory > Abdominal > Regions > Specific_Descriptions
1436	upper portion of the esophagus	esophagus	upper		Esophagus	esophagus				mediastinum, thorax, whole body	mediastinum, thorax, whole body	Respiratory > Abdominal > Organs > Esophagus > General
1437	upper portion of the right atrium	right atrium	upper		Right atrial structure	right atrium				heart, mediastinum, thorax, whole body	heart, mediastinum, thorax, whole body	Respiratory > Cardiovascular > Heart > Chambers > Atrium > Laterality > Right
1438	upper portion of the svc	svc	upper		Superior vena cava structure							Respiratory > Cardiovascular > Great_Vessels > Vena_Cava > Superior > General
1439	upper quadrant	upper quadrant			Structure of upper abdominal quadrant							Respiratory > Abdominal > Regions > Quadrants > Upper
1440	upper respiratory airway	upper airway			Airway structure							Respiratory > General > Airway > Range > Upper
1441	upper right	upper right			-							Respiratory > Other > Relative_Positions > Upper
1442	upper right abdomen	upper right abdomen			Structure of right upper quadrant of abdomen	Substructure	Abdomen	Abdominal Structures				Respiratory > Abdominal > Regions > Upper > Laterality > Right
1443	upper right atrium	upper right atrium			Right atrial structure							Respiratory > Cardiovascular > Heart > Specific_Descriptions
1444	upper right mediastinum	upper right mediastinum			Mediastinum							Respiratory > Mediastinum > Regions > Upper > Laterality > Right
1445	upper right thorax	upper right thorax			Bone structure of thorax							Respiratory > Other > Specific_Descriptions
1446	upper stomach	upper stomach			Stomach structure	Stomach	Stomach	Abdominal Structures	peritoneal cavity, abdomen, whole body		peritoneal cavity, abdomen, whole body	Respiratory > Abdominal > Organs > Stomach > Position > Upper
1447	upper superior vena cava	superior vena cava	upper		Superior vena cava structure	superior vena cava				mediastinum, thorax, whole body	mediastinum, thorax, whole body	Respiratory > Cardiovascular > Great_Vessels > Vena_Cava > Superior > General
1448	upper svc	svc	upper		Superior vena cava structure							Respiratory > Cardiovascular > Great_Vessels > Vena_Cava > Superior > General
1449	upper third of the right atrium	upper right atrium	third		Right atrial structure							Respiratory > Cardiovascular > Heart > Specific_Descriptions
1450	upper thoracic	upper thoracic			Bone structure of thorax							Respiratory > Musculoskeletal > Bones > Spine > Thoracic > Regions > Upper
1451	upper thoracic spine	upper thoracic spine			Thoracic spine structure	Thoracic spine	spine	Skeletal System				Respiratory > Musculoskeletal > Bones > Spine > Position > Upper
1452	upper thorax	upper thorax			Bone structure of thorax							Respiratory > General > Chest > Laterality > Position > Upper > General
1453	upper to mid bodies of the stomach	bodies of the stomach	upper to mid		Body of stomach (C0227230)	Stomach	Stomach	Abdominal Structures	peritoneal cavity, abdomen, whole body		peritoneal cavity, abdomen, whole body	Respiratory > Abdominal > Organs > Stomach > General
1454	upper to mid portion of the svc	svc	upper to mid		Superior vena cava structure							Respiratory > Cardiovascular > Great_Vessels > Vena_Cava > Superior > General
1455	upper to mid svc	svc	upper to mid		Superior vena cava structure							Respiratory > Cardiovascular > Great_Vessels > Vena_Cava > Superior > General
1456	upper trachea	trachea	upper		Trachea	Trachea	Airways	Respiratory System	mediastinum, thorax, whole body	mediastinum, thorax, whole body	mediastinum, thorax, whole body	Respiratory > General > Specific > Trachea > General
1457	upper zone	upper			-							Respiratory > Other > Relative_Positions > Upper
1458	upper zone laterally	upper zone laterally			-							Respiratory > General > Lung > Zones > Upper > Range > Lateral
1459	upper zones	upper			-							Respiratory > Other > Relative_Positions > Upper
1460	upper-mid svc	svc	upper-mid		Superior vena cava structure							Respiratory > Cardiovascular > Great_Vessels > Vena_Cava > Superior > General
1461	upper-to-mid svc	svc	upper-to-mid		Superior vena cava structure							Respiratory > Cardiovascular > Great_Vessels > Vena_Cava > Superior > General
1462	ureter	ureter			Ureter	ureter				retroperitoneum, abdomen, whole body	retroperitoneum, abdomen, whole body	Respiratory > Other_Anatomical_Structures > Specific_Descriptions
1463	ventricle	ventricle			Heart Ventricle							Respiratory > Cardiovascular > Heart > Chambers > Ventricle > General
1464	vertebra at the thoracolumbar junction	vertebra at the thoracolumbar junction			Thoracolumbar vertebral column							Respiratory > Musculoskeletal > Bones > Spine > Specific_Descriptions
1465	vertebral bodies thoracolumbar spine	vertebral bodies thoracolumbar spine			Thoracolumbar vertebral column	Thoracolumbar spine	spine	Skeletal System				Respiratory > Musculoskeletal > Bones > Spine > Specific_Descriptions
1466	within the cardiac shadow	cardiac	within		Heart							Respiratory > Cardiovascular > Heart > General
1467	within the partially collapsed right lung	right lung			Lung	Right lung	Lungs	Respiratory System	thorax, whole body	thorax, whole body	thorax, whole body	Respiratory > General > Lung > Laterality > Right
1468	within the stomach	stomach	within		Stomach structure	Stomach	Stomach	Abdominal Structures	peritoneal cavity, abdomen, whole body	peritoneal cavity, abdomen, whole body	peritoneal cavity, abdomen, whole body	Respiratory > Abdominal > Organs > Stomach > General
1469	above the level of the effusion	above the level of the effusion										Respiratory > Other > Imaging_Descriptions
1470	anterior upper lumbar vertebral body	anterior upper lumbar vertebral body										Respiratory > Musculoskeletal > Bones > Spine > Lumbar > Specific
1471	ap window	ap window										Respiratory > Cardiovascular > Specific_Descriptions
1472	apical areas on either side	apical areas on either side										Respiratory > General > Lung > Regions > Apical > Laterality > Bilateral
1473	area of bronchiectasis	area of bronchiectasis										Respiratory > Other > Imaging_Descriptions
1474	area of the biopsies	area of the biopsies										Respiratory > Other > Imaging_Descriptions
1475	around g-tube	around g-tube										Respiratory > Other > Medical_Procedures
1476	at the ge junction	ge junction										Respiratory > Abdominal > Junctions > Gastroesophageal
1477	below ge junction	ge junction	below									Respiratory > Abdominal > Junctions > Gastroesophageal
1478	below the ge junction	ge junction	below									Respiratory > Abdominal > Junctions > Gastroesophageal
1479	body of the stomach	body of the stomach										Respiratory > Abdominal > Organs > Stomach > Regions > Body
1480	b/l upper lobe	b/l upper lobe										Respiratory > General > Lung > Lobes > Upper > Laterality > Bilateral
1481	bilateral interstitial	bilateral interstitial										Respiratory > General > Lung > Regions > Interstitial > Laterality > Bilateral
1482	body of the esophagus	body of the esophagus										Respiratory > Abdominal > Organs > Esophagus > Specific_Descriptions
1483	both	both										Respiratory > Other > Relative_Positions > Bilateral
1484	both apical areas	both apical areas			Apical zone of lung	Bilateral lung	Lungs	Respiratory System				Respiratory > General > Lung > Regions > Apical > Laterality > Bilateral
1485	both bases	both bases			Basal segment of lung (C0225704)	Bilateral lung						Respiratory > General > Regions > Basal > Laterality > Bilateral
1486	both lobes of the lung	both lobes of the lung			Structure of lobe of lung	Bilateral lobe						Respiratory > General > Lung > Lobes > Laterality > Bilateral
1487	both lower lobes	both lower lobes			Structure of lower lobe of lung	Bilateral lobe						Respiratory > General > Lung > Lobes > Lower > Laterality > Bilateral
1488	both lower lungs	both lower lungs			Lower zone of lung (C0559288)	Bilateral lung						Respiratory > Other > Relative_Positions > Bilateral
1489	both lower zones	both lower zones			Lower zone of lung (C0559288)	Bilateral lung						Respiratory > Other > Relative_Positions > Bilateral
1490	both lung apices	both lung apices			Apical zone of lung	Bilateral lung						Respiratory > General > Specific > Apices > Laterality > Bilateral
1491	both lung bases	both lung bases			Basal segment of lung (C0225704)	Bilateral lung						Respiratory > Other > Relative_Positions > Bilateral
1492	both lung fields	both lung fields			Lung	Bilateral lung						Respiratory > General > Lung > Laterality > Bilateral
1493	both lungs	both lungs			Lung	Bilateral lung						Respiratory > General > Lung > Laterality > Bilateral
1494	both pulmonary hila	both pulmonary hila										Respiratory > General > Specific > Hila > Laterality > Bilateral
1495	both upper lobes	both upper lobes			Structure of upper lobe of lung	Bilateral lobe	Lungs	Respiratory System				Respiratory > General > Lung > Lobes > Upper > Laterality > Bilateral
1496	bypass arteries	bypass arteries										Respiratory > Cardiovascular > Great_Vessels > Coronary > Specific
1497	diaphragmatic hiatus	diaphragmatic hiatus										Respiratory > Abdominal > Other > Diaphragmatic_Hiatus
1498	distal body of the stomach	distal body of the stomach			right costophrenic sulcus			Right costodiaphragmatic recess				Respiratory > Abdominal > Organs > Stomach > Specific_Descriptions
1499	entire chest	entire chest										Respiratory > General > Chest > General
1500	entire left	entire left										Respiratory > Other > Specific_Descriptions
1501	entire lungs	entire lungs			Lung	Lung	Lungs	Respiratory System	thorax, whole body		thorax, whole body	Respiratory > General > Lung > Laterality > Bilateral
1502	entire right lung	entire right lung			Lung	Right lung	Lungs	Respiratory System	thorax, whole body		thorax, whole body	Respiratory > General > Lung > Laterality > Right
1503	expected course of the left innominate vein	expected course of the left innominate vein										Respiratory > Cardiovascular > Great_Vessels > Brachiocephalic > Vein > Specific_Descriptions
1504	expected course of the splenic artery	expected course of the splenic artery										Respiratory > Other > Specific_Descriptions
1505	expected location for a left-sided svc placement	expected location for a left-sided svc placement										Respiratory > Cardiovascular > Great_Vessels > Subclavian > Specific_Descriptions
1506	expected location of the right ventricle	expected location of the right ventricle										Respiratory > Other > Specific_Descriptions
1507	expected locations	expected locations										Respiratory > Other > Specific_Descriptions
1508	first and second sternal wires	first and second sternal wires										Respiratory > Musculoskeletal > Bones > Ribs > Specific_Descriptions
1509	fractured vertebral body	fractured vertebral body										Respiratory > Musculoskeletal > Bones > Spine > Specific_Descriptions
1510	from the level of the carina upwards towards the neck	from the level of the carina upwards towards the neck										Respiratory > Other > Specific_Descriptions
1511	frontal and lateral	frontal and lateral										Respiratory > Other > Imaging_Descriptions
1512	fundus and body of the stomach	fundus and body of the stomach										Respiratory > Abdominal > Organs > Stomach > Specific_Descriptions
1513	ge junction	ge junction										Respiratory > Abdominal > Junctions > Gastroesophageal
1514	hiatus	hiatus										Respiratory > Abdominal > Other > Diaphragmatic_Hiatus
1515	inferior most wire	inferior most wire										Respiratory > Musculoskeletal > Bones > Sternum > Specific_Descriptions
1516	infrahilar portions of both lower lobes	infrahilar portions of both lower lobes										Respiratory > General > Specific > Infrahilar > Laterality > Bilateral
1517	l and r	l and r										Respiratory > Other > Relative_Positions > Combined
1518	l lower lung field	l lower lung field										Respiratory > General > Lung > Zones > Lower > Laterality > left
1519	l upper lone	l upper lone										Respiratory > Other > Specific_Descriptions
1520	lateral right third and seventh ribs	lateral right ribs	third	seventh								Respiratory > Musculoskeletal > Bones > Ribs > Laterality > Right
1521	left arm	left arm				left arm				left upper extremity, whole body	left upper extremity, whole body	Respiratory > Other_Anatomical_Structures > Specific_Descriptions
1522	left forearm	left forearm				left forearm				left upper extremity, whole body	left upper extremity, whole body	Respiratory > Other_Anatomical_Structures > Specific_Descriptions
1523	left neck and upper chest	left neck, upper chest										Respiratory > Other_Anatomical_Structures > Neck > Laterality > Left
1524	left upper lobectomy	left upper lobectomy										Respiratory > Other > Medical_Procedures
1525	lll	lll										Respiratory > General > Lung > Lobes > Lower > Laterality > Left
1526	low thoracic/upper lumbar vertebral body	low thoracic, upper lumbar vertebral body										Respiratory > Musculoskeletal > Bones > Spine > Thoracic > Regions > Lower
1527	lower body of the stomach	lower body of the stomach										Respiratory > Abdominal > Organs > Stomach > Position > Lower
1528	lower neck	lower neck										Respiratory > Other_Anatomical_Structures > Neck > Regions > Lower
1529	lower neck area	lower neck area										Respiratory > Other_Anatomical_Structures > Neck > Regions > Lower
1530	lower thoracic vertebral body	lower thoracic vertebral body										Respiratory > Musculoskeletal > Bones > Spine > Thoracic > Regions > Lower
1531	lumbar vertebral body	lumbar vertebral body										Respiratory > Musculoskeletal > Bones > Spine > Lumbar > General
1532	manubrium and upper body	manubrium and upper body										Respiratory > Musculoskeletal > Bones > Sternum > Regions > Manubrium
1533	mid body of the stomach	mid body of the stomach										Respiratory > Abdominal > Organs > Stomach > Position > Middle
1534	mid rv	mid rv										Respiratory > Cardiovascular > Heart > Chambers > Ventricle > Position > Mid
1535	mid shaft of the right clavicle	mid shaft of the right clavicle										Respiratory > Musculoskeletal > Bones > Clavicle > Position > Mid
1536	mid thoracic vertebral body	mid thoracic vertebral body										Respiratory > Musculoskeletal > Bones > Spine > Thoracic > Regions > Mid
1537	mid-thoracic vertebral body	mid-thoracic vertebral body										Respiratory > Musculoskeletal > Bones > Spine > Thoracic > Regions > Mid
1538	mid-to-lower thoracic vertebral body	mid-to-lower thoracic vertebral body										Respiratory > Musculoskeletal > Bones > Spine > Thoracolumbar
1539	most inferior sternotomy suture	most inferior sternotomy suture										Respiratory > Musculoskeletal > Bones > Sternum > Specific_Descriptions
1540	mostly right lung	right lung			right lung	Right lung	Lungs	Respi	thorax, whole body	thorax, whole body	thorax, whole body	Respiratory > General > Lung > Laterality > Right
1541	neck	neck				neck				whole body	whole body	Respiratory > Other_Anatomical_Structures > Neck > General
1542	periphery of both lungs	both lungs	periphery									Respiratory > General > Lung > Laterality > Bilateral
1543	position	position										Respiratory > Other > Imaging_Descriptions
1544	post-pyloric	post-pyloric										Respiratory > Abdominal > Organs > Stomach > Regions > Pylorus
1545	proximal and neck vessels	proximal and neck vessels										Respiratory > Cardiovascular > Great_Vessels > Specific_Descriptions
1546	proximal humeral neck	proximal humeral neck										Respiratory > Musculoskeletal > Bones > Humerus > Position > Specific_Descriptions
1547	proximal portion of the body of the stomach	proximal portion of the body of the stomach										Respiratory > Abdominal > Organs > Stomach > Specific_Descriptions
1548	pylorus	pylorus				pylorus				peritoneal cavity, abdomen, whole body	peritoneal cavity, abdomen, whole body	Respiratory > Abdominal > Organs > Intestines > Small > Specific
1549	r arm	r arm										Respiratory > Other_Anatomical_Structures > Specific_Descriptions
1550	r base	r base										Respiratory > General > Regions > Basal > Laterality > Right
1551	r-sided	r-sided										Respiratory > Other > Relative_Positions > Right
1552	ra	ra										Respiratory > Cardiovascular > Heart > Chambers > Atrium > Laterality > Right
1553	ra-svc junction	ra-svc junction										Respiratory > Cardiovascular > Great_Vessels > Vena_Cava > Superior > Junctions
1554	retrocardiac lung regions	retrocardiac lung regions										Respiratory > General > Regions > Retrocardiac > General
1555	right cp angle	right cp angle			right costophrenic sulcus	Right costodiaphragmatic recess						Respiratory > General > Specific > Costophrenic_Angles > Laterality > Right
1556	right femoral neck	right femoral neck				right femoral neck				right hip joint, right hip, right lower extremity, whole body	right hip joint, right hip, right lower extremity, whole body	Respiratory > Musculoskeletal > Bones > Femur > Laterality > Right
1557	right glenoid fossa	right glenoid fossa										Respiratory > Musculoskeletal > Joints > Glenoid > Laterality > Right
1558	right hip	right hip				right hip				right lower extremity, whole body	right lower extremity, whole body	Respiratory > Other_Anatomical_Structures > Specific_Descriptions
1559	right humeral neck	right humeral neck										Respiratory > Musculoskeletal > Bones > Humerus > Position > Specific_Descriptions
1560	right humeral surgical neck	right humeral surgical neck										Respiratory > Musculoskeletal > Bones > Humerus > Position > Specific_Descriptions
1561	right ij	right ij										Respiratory > Other_Anatomical_Structures > Specific_Descriptions
1562	right ij sheath location	right ij sheath location										Respiratory > Other_Anatomical_Structures > Specific_Descriptions
1563	right lower neck	right lower neck										Respiratory > Other_Anatomical_Structures > Neck > Regions > Lower
1564	right medial basal	right medial basal										Respiratory > General > Regions > Other > Laterality > Right
1565	right medial base	right medial base										Respiratory > General > Regions > Other > Laterality > Right
1566	right medial lung apex	right medial lung apex										Respiratory > General > Regions > Other > Laterality > Right
1567	right medial lung base	right medial lung base										Respiratory > General > Regions > Other > Laterality > Right
1568	right neck	right neck										Respiratory > Other_Anatomical_Structures > Neck > Laterality > Right
1569	right supraclavicular region in the neck	right supraclavicular region in the neck										Respiratory > Other_Anatomical_Structures > Supraclavicular > Laterality > Right
1570	rll	rll										Respiratory > General > Lung > Lobes > Lower > Laterality > Right
1571	ruq	ruq										Respiratory > Abdominal > Regions > Quadrants > Upper_Right
1572	soft tissue of the neck	soft tissue of the neck										Respiratory > Other_Anatomical_Structures > Neck > General
1573	spinal column	spinal column										Respiratory > Musculoskeletal > Bones > Spine > General
1574	standard	standard										Respiratory > Other > Specific_Descriptions
1575	standard locations	standard locations										Respiratory > Other > Specific_Descriptions
1576	standard placement	standard placement										Respiratory > Other > Specific_Descriptions
1577	standard placements	standard placements										Respiratory > Other > Specific_Descriptions
1578	sternal wires	sternal wires										Respiratory > Musculoskeletal > Bones > Sternum > Specific_Descriptions
1579	stomach body	stomach body										Respiratory > Abdominal > Organs > Stomach > General
1580	superior direction junction	superior direction junction										Respiratory > Other > Specific_Descriptions
1581	superior most wire	superior most wire										Respiratory > Musculoskeletal > Bones > Sternum > Specific_Descriptions
1582	superior most wires	superior most wires										Respiratory > Musculoskeletal > Bones > Sternum > Specific_Descriptions
1583	superior third sternal wire	superior third sternal wire										Respiratory > Musculoskeletal > Bones > Sternum > Specific_Descriptions
1584	superior to the vertebroplasty	superior to the vertebroplasty										Respiratory > Other > Anatomical_Directions > Superior
1585	svc-ra junction	svc-ra junction										Respiratory > Cardiovascular > Great_Vessels > Vena_Cava > Superior > Junctions
1586	svc/ra junction	svc/ra junction										Respiratory > Cardiovascular > Great_Vessels > Vena_Cava > Superior > Junctions
1587	t10 vertebral body	t10 vertebral body										Respiratory > Musculoskeletal > Bones > Spine > Vertebrae > Specific > T10
1588	t6 vertebral body	t6 vertebral body										Respiratory > Musculoskeletal > Bones > Spine > Vertebrae > Specific > T6
1589	t9 vertebral body	t9 vertebral body										Respiratory > Musculoskeletal > Bones > Spine > Vertebrae > Specific > T9
1590	the ge junction	the ge junction										Respiratory > Abdominal > Junctions > Gastroesophageal
1591	thoracoabdominal wall and neck	thoracoabdominal wall and neck										Respiratory > Other_Anatomical_Structures > Thoracoabdominal
1592	tibial plateau	tibial plateau										Respiratory > Other_Anatomical_Structures > Specific_Descriptions
1593	trach tube	trach tube										Respiratory > General > Specific > Trachea > General
1594	upper abdomen near the ge junction	upper abdomen	near the ge junction									Respiratory > Abdominal > General
1595	upper lumbar vertebral body	upper lumbar vertebral body										Respiratory > Musculoskeletal > Bones > Spine > Lumbar > Specific
1596	upper mid thoracic vertebral body	upper mid thoracic vertebral body										Respiratory > Musculoskeletal > Bones > Spine > Thoracic > Specific
1597	upper to mid body of the stomach	upper to mid body of the stomach										Respiratory > Abdominal > Organs > Stomach > Position > Upper
1598	pleural	pleural			Pleura	Pleural	Pleural	Respiratory System				Respiratory > General > Specific > Pleura > General
1599	pleura	pleura			Pleura	Pleural	Pleural	Respiratory System		thorax, whole body	thorax, whole body	Respiratory > General > Specific > Pleura > General
1600	cardiopulmonary	cardiopulmonary										Respiratory > Cardiovascular > Heart > General
1601	preibronchial	preibronchial										Respiratory > General > Specific > Bronchi > General
1602	pulmonary	pulmonary										Respiratory > General > Lung > General
1603	left cardiac	left cardiac										Respiratory > Cardiovascular > Heart > Laterality > Left
1604	cardiomediastinal	cardiomediastinal										Respiratory > Cardiovascular > Heart > General
1605	cardio mediastinal	cardio mediastinal										Respiratory > Cardiovascular > Heart > General
1606	diaphragmatic	diaphragmatic			trachealEntire diaphragm	Diaphragm		Abdominal Structures	thorax, whole body		thorax, whole body	Respiratory > Diaphragm > General
1607	hemidiaphragmatic	hemidiaphragmatic			Hemithoracic structure	Hemithorax		Thoracic Structures				Respiratory > Diaphragm > General
1608	tracheal	tracheal			Trachea	Trachea	Airways	Respiratory System	mediastinum, thorax, whole body		mediastinum, thorax, whole body	Respiratory > General > Specific > Trachea > General
1609	right cardiac	right cardiac										Respiratory > Cardiovascular > Heart > Laterality > Right
1610	right upper mediastinal	right upper mediastinal			Upper zone of lung (C0559286)	Right lung	Lungs	Respiratory System	thorax, whole body		thorax, whole body	Respiratory > Mediastinum > Regions > Upper > Laterality > Right
1611	intracardiac	intracardiac										Respiratory > Cardiovascular > Heart > General
1612	pericardial	pericardial										Respiratory > Cardiovascular > Pericardial
1613	acromioclavicular	acromioclavicular										Respiratory > Musculoskeletal > Joints > Acromioclavicular > General
1614	subcarinal	subcarinal										Respiratory > Mediastinum > Specific_Descriptions
1615	coronary artery	coronary artery										Respiratory > Cardiovascular > Great_Vessels > Coronary > General
1616	costochondral	costochondral										Respiratory > Musculoskeletal > Joints > Costochondral
1617	left main bronchus	left main bronchus				left main bronchus				mediastinum, thorax, whole body	mediastinum, thorax, whole body	Respiratory > General > Specific > Bronchi > Laterality > Left > Main
1618	mitral anulus	mitral anulus			Structure of anulus fibrosus of mitral orifice							Respiratory > Cardiovascular > Heart > Valves > Mitral
1619	tracheobronchial tree	tracheobronchial tree				tracheobronchial tree				mediastinum, thorax, whole body	mediastinum, thorax, whole body	Respiratory > General > Specific > Bronchi > Tree
1620	vascular	vascular										Respiratory > General > Lung > Pulmonary_Vasculature > General
1621	aortic annular	aortic annular										Respiratory > Cardiovascular > Great_Vessels > Aorta > Specific_Descriptions
1622	coronary artery	coronary artery										Respiratory > Cardiovascular > Great_Vessels > Coronary > General
1623	coronary	coronary										Respiratory > Cardiovascular > Great_Vessels > Coronary > General
1624	mitral annular	mitral annular										Respiratory > Cardiovascular > Heart > Valves > Mitral
1625	lymph node	lymph node										Respiratory > Lymphatic > Nodes
1626	spinal	spinal										Respiratory > Musculoskeletal > Bones > Spine > General
1627	airspace	airspace										Respiratory > General > Specific > Alveolar
1628	lobar airspace	lobar airspace										Respiratory > General > Lung > Regions > Airspace
1629	lobar	lobar										Respiratory > General > Lung > Lobes > General
1630	peribronchial	peribronchial										Respiratory > General > Specific > Bronchi > General
1631	alveolar	alveolar										Respiratory > General > Specific > Alveolar
1632	tracheal	tracheal										Respiratory > General > Specific > Trachea > General
1633	downward	downward										Respiratory > Other > Anatomical_Directions > Inferior
1634	thoracolumbar	thoracolumbar										Respiratory > Musculoskeletal > Bones > Spine > Thoracolumbar
1635	right hilar lung	right hilar lung										Respiratory > General > Specific > Hila > Laterality > Right
1636	central pulmonary vessel	central pulmonary vessel										Respiratory > General > Lung > Pulmonary_Vasculature > Specific
1637	left-sided hemidiaphragm	left-sided hemidiaphragm										Respiratory > Diaphragm > Laterality > Left
1638	wall	wall										Respiratory > Other > Specific_Descriptions
1639	mediatinal	mediatinal										Respiratory > Mediastinum > General
1640	costovertebral angles	costovertebral angles										Respiratory > Other_Anatomical_Structures > Specific_Descriptions
1641	costophrenic sinuses	costophrenic sinuses										Respiratory > General > Specific > Costophrenic_Angles > General
1642	l1	l1										Respiratory > Musculoskeletal > Bones > Spine > Lumbar > Specific
1643	t8	t8										Respiratory > Musculoskeletal > Bones > Spine > Vertebrae > Specific > T8
1644	8th rib	8th rib										Respiratory > Musculoskeletal > Bones > Ribs > Specific_Descriptions
1645	first left rib	first left rib										Respiratory > Musculoskeletal > Bones > Ribs > Specific_Descriptions
1646	left 11th rib	left 11th rib										Respiratory > Musculoskeletal > Bones > Ribs > Laterality > Left
1647	hip	hip				hip				lower extremity, whole body	lower extremity, whole body	Respiratory > Other_Anatomical_Structures > Specific_Descriptions
1648	juxtahilar	juxtahilar										Respiratory > General > Specific > Juxtahilar > General
1649	t9 vertebrl body	t9 vertebrl body										Respiratory > Musculoskeletal > Bones > Spine > Vertebrae > Specific > T9
1650	intravascular	intravascular										Respiratory > Other > Specific_Descriptions
1651	peribronchiolar	peribronchiolar										Respiratory > General > Specific > Bronchi > General
1652	soft tissue	soft tissue										Respiratory > Musculoskeletal > Soft_Tissues > General
1653	suprahilar	suprahilar										Respiratory > General > Specific > Suprahilar > General
1654	acute intra pulm	acute intra pulm										Respiratory > General > Lung > Parenchyma
1655	acute intrapulm	acute intrapulm										Respiratory > General > Lung > Parenchyma
1656	air space	air space										Respiratory > General > Specific > Alveolar
1657	cardiothoracic	cardiothoracic										Respiratory > Cardiovascular > Heart > General
1658	intrapulmonary	intrapulmonary										Respiratory > General > Lung > Parenchyma
1659	multilobar	multilobar										Respiratory > General > Lung > Lobes > General
1660	intraabdominal	intraabdominal										Respiratory > Abdominal > General
1661	subcutaneous	subcutaneous										Respiratory > Other > Specific_Descriptions
1662	ribcage	ribcage										Respiratory > Musculoskeletal > Bones > Ribs > General
1663	lobe	lobe										Respiratory > General > Lung > Lobes > General
1664	partial lobar	partial lobar										Respiratory > General > Lung > Lobes > Partial
1665	bone	bone										Respiratory > Musculoskeletal > Bones > General
1666	esophageal stricture	esophageal stricture										Respiratory > Abdominal > Organs > Esophagus > Specific_Descriptions
1667	ac joint	ac joint										Respiratory > Musculoskeletal > Joints > Acromioclavicular > General
1668	humeral	humeral										Respiratory > Musculoskeletal > Bones > Humerus > General
1669	bronchial	bronchial										Respiratory > General > Specific > Bronchi > General
1670	vascular pedicle	vascular pedicle										Respiratory > General > Lung > Pulmonary_Vasculature > Specific
1671	intrabdominal	intrabdominal										Respiratory > Abdominal > General
1672	supraclavicular	supraclavicular										Respiratory > Other_Anatomical_Structures > Supraclavicular > General
1673	endobronchial	endobronchial										Respiratory > General > Specific > Bronchi > Specific_Descriptions
1674	subcavian	subcavian										Respiratory > Cardiovascular > Great_Vessels > Subclavian > General
1675	upward	upward										Respiratory > Other > Anatomical_Directions > Superior
1676	left-sided cardiomediastinal	left-sided cardiomediastinal										Respiratory > Cardiovascular > Heart > Specific_Descriptions
1677	left diaphragmatic	left diaphragmatic										Respiratory > Diaphragm > Laterality > Left
1678	right-sided rib	right-sided rib			Bone structure of rib	Right rib	Ribs	Musculoskeletal System				Respiratory > Musculoskeletal > Bones > Ribs > Laterality > Right
1679	right-sided diaphragm	right-sided diaphragm										Respiratory > Diaphragm > Laterality > Right
1680	bronchial wall	bronchial wall										Respiratory > General > Specific > Bronchi > General
1681	pleural sulcus	pleural sulcus										Respiratory > General > Specific > Pleura > General
1682	right acromioclavicular	right acromioclavicular										Respiratory > Musculoskeletal > Joints > Acromioclavicular > Laterality > Right
1683	upper mediastinal silhouette	upper mediastinal silhouette										Respiratory > Mediastinum > Specific_Descriptions
1684	upper mediastinum	upper mediastinum										Respiratory > Mediastinum > General
1685	lobe lung	lobe lung										Respiratory > General > Lung > Lobes > General
1686	right-sided pleural	right-sided pleural										Respiratory > General > Specific > Pleura > Laterality > Right
1687	left-sided pleural	left-sided pleural										Respiratory > General > Specific > Pleura > Laterality > Left
1688	pulmonary vascular	pulmonary vascular										Respiratory > General > Lung > Pulmonary_Vasculature > General
1689	mediastinal right-sided	mediastinal right-sided										Respiratory > Mediastinum > Laterality > Right
1690	left hemidiaphragmatic	left hemidiaphragmatic										Respiratory > Diaphragm > Laterality > Left
1691	pulmonary arteries	pulmonary arteries										Respiratory > General > Lung > Pulmonary_Vasculature > Specific
1692	rib	rib			Bone structure of rib	Rib	Ribs	Musculoskeletal System				Respiratory > Musculoskeletal > Bones > Ribs > General
1693	airway	airway										Respiratory > General > Airway > General
1694	aortopulmonic window	aortopulmonic window										Respiratory > Cardiovascular > Specific_Descriptions
1695	bowel	bowel										Respiratory > Abdominal > Organs > Intestines > Large > General
1696	clavicle	clavicle				clavicle				shoulder, upper extremity, whole body	shoulder, upper extremity, whole body	Respiratory > Musculoskeletal > Bones > Clavicle > General
1697	clavicular	clavicular										Respiratory > Musculoskeletal > Bones > Clavicle > General
1698	diaphragms	diaphragms										Respiratory > Diaphragm > General
1699	hemidiaphragms	hemidiaphragms										Respiratory > Diaphragm > General
1700	left anterior rib	left anterior rib										Respiratory > Musculoskeletal > Bones > Ribs > Laterality > Left
1701	pleural cavity	pleural cavity										Respiratory > General > Specific > Pleura > Space
1702	pleural sinuses	pleural sinuses										Respiratory > General > Specific > Pleura > Space
1703	pleural sinus	pleural sinus										Respiratory > General > Specific > Pleura > Space
1704	right hemidiaphragmatic contour	right hemidiaphragmatic contour										Respiratory > Diaphragm > Laterality > Right
1705	thoracic vertebral	thoracic vertebral										Respiratory > Musculoskeletal > Bones > Spine > General
